# Supplementary material for: Too fast to stay on track? Shorter time to first anti-retroviral regimen is not associated with better retention in care in the French Dat’AIDS cohort
Source: PLoS One. 2019 Sep 6;14(9):e0222067. doi: 10.1371/journal.pone.0222067 (PMC6730866; doi:10.1371/journal.pone.0222067)
Supplement: S1 Dataset — (XLSX) [file pone.0222067.s001.xlsx]

## Sheet: SYNTHESE_après exclusion
PATNUME2	YEAR_INCARE	RETENTION M12	INF.	HEPATITIS	LATE DIAG.	ADVANCED	ACUTE	YEAR HIV	Sexuality	Gender	AGE	AGE_HIV Diag	AIDS_Class	HIVRNA_DIAG_LOG	PREART_HIVRNA_LOG	CD4_DIAG	CD4_PREART	DURATION_1srtART_M	DURATION_1srtART_D	Reason disc.	Agent3	ART_Type	Time_DIAG_encounter	DELAI_Encounter_ART	Time_DIAG_NonDETECT	Time_ART_NonDETECT	Time_DIAG_ART	Time_DIAG_AIDS	FU(Days)	CD4_M1 ART	RNA_M1 ART	Nondetect_M1 ART	CD4_M3 ART	RNA_M3_ART	Nondetect_M3 ART	CD4 _M6 ART	RNA_M6_ART	Nondetect M6 DIAG	Nondetect_M6 ART	CD4_M12 ART	RNA_M12_ART	Nondetect_M12 ART	Nondetect M12 DIAG	CD4_M18 ART	RNA_M18_ART	Nondetect M18 ART	RNA_M12_DIAG	RNA_M6_DIAG
10854244411	2011	YES	VIH		YES	YES	NO	2011	MWW	H	33	28	NonAIDS	5.31	5.31	133	133	1	45	Other	IPb	2N+1IPb	9	7	447	431	16		1731				147	4.47	NO					247	2.04	NO	NO	183	1.6	YES	2.04
10859827578	2013	YES	VIH&HEP	VHC	YES	NO	NO	2013	MWW	H	42	38	NonAIDS	3.88	3.67	335.6	236.3	58	1755		IPb	2N+1IPb	29	7	97	61	36		1673		1.83	NO
10862072169	2011	NO	VIH		YES	YES	NO	2011	Woman	F	45	39	AIDS	4.71		60.9		35	1079	Simplification	IPb	2N+1IPb	21	7	143	115	28	267	2357		3.49	NO	62	1.97	NO	132	1.7	NO	NO	156	1.7	NO						1.7
10863059461	2011	YES	VIH		YES	NO	NO	2011	Woman	F	62	56	NonAIDS	1.7	1.7	282.8	285.9	24	728	SIDEFF	IPb	2N+1IPb	10	103	10	-103	113		2385	247	1.7	NO	255	1.7	NO
10865804016	2010	YES	VIH&HEP	VHB	NO	NO	NO	2010	Woman	F	27	20	NonAIDS	3.19	4.01	1124	668	6	194	Other	IPb	2N+1IPb	10	1615	2248	623	1625		2779	856	2.15	NO						NO										4
10871731042	2010	YES	VIH		YES	YES	NO	2010	MWM	H	45	38	NonAIDS	5.8	5.8	189	189	46	1391	SIDEFF	INNTI	2N+1NN	10	2	122	110	12		2739	268	2.58	NO				337	1.67	NO	NO					438	1.7	NO		1.67
10873083770	2010	YES	VIH		YES	YES	NO	2010	MWW	H	29	22	AIDS	5.65	5.65	22	22	28	838	Simplification	IPb	2N+1IPb	1	1	373	371	2	7	2647	122	3.46	NO				237	1.83	NO	NO	267	1.7	NO	NO				1.7	1.83
10875096619	2012	YES	VIH		NO	NO	NO	2012	Woman	F	65	62	NonAIDS	1.7	1.81	362	360	1	4	SIDEFF	INNTI	2N+1NN	7	135	422	280	142		1176														YES				1.6
10877433419	2011	YES	VIH		NO	NO	NO	2011	MWM	H	47	41	NonAIDS	4.17	3.97	794.2	532	5	147	SIDEFF	INNTI	2N+1NN	9	928	1203	266	937		2419	571	1.94	NO	570	1.6	YES	698	1.6	NO	YES	576	1.91	NO		746	1.6	YES		3.89
10882193982	2011	YES	VIH		NO	NO	NO	2011	MWM	H	26	23	NonAIDS	4.49	4.99	490	290	63	1918		INNTI	2N+1NN	31	322	536	183	353		1087	403	2.64	NO	750	1.6	YES	659	1.6		YES				NO	490	1.6	YES	2.89
10884498059	2011	NO	VIH		NO	NO	NO	2011	MWM	H	30	24	NonAIDS	4.4	4.4	857	857	67	2049	SIDEFF	INNTI	2N+1NN	24	19	163	120	43		2099	867	2.36	NO												1057	1.6	YES
10884670436	2013	YES	VIH		NO	NO	NO	2013	MWM	H	34	30	NonAIDS	3.47	3.37	425	442	51	1551		INNTI	2N+1NN	24	135	283	124	159		1584	706	1.6	YES						YES										1.6
10892234265	2013	YES	VIH		ND	ND	NO	2011	MWM	H	55	49	AIDS		5.1		11.8	17	503	Other	IPb	2N+1IPb	545	8	722	169	553	547	1477		2.9	NO		2	NO		1.6		YES
10893592298	2010	YES	VIH		NO	NO	NO	2010	MWM	H	38	31	NonAIDS	3.15	3.65	381.9	390	77	2336		INSTI	2N+1II	13	365	413	35	378		2552	340	1.7	NO				467	1.7	NO	NO	518	1.7	NO		547	1.6	YES		3.6
10810935437	2011	YES	VIH		NO	NO	NO	2011	MWM	H	42	36	NonAIDS	3.47	3.47	427	427	26	782	Simplification	IPb	2N+1IPb	5	8	186	173	13		2488							753	1.7	NO	NO						1.61	NO		1.7
10812542140	2012	YES	VIH&HEP	VHC	NO	NO	NO	2012	MWW	H	37	32	NonAIDS	4.61	4.83	576.3	642	35	1078	Simplification	IPb	2N+1IPb	0	167	363	196	167		1693				758	1.78	NO			NO		644	1.6	YES	YES				1.6	4.83
10843668520	2010	YES	VIH&HEP	VHB	NO	NO	NO	2010	MWW	H	37	35	NonAIDS	4.48	4.48	418	324	89	2702		INNTI	2N+1NN	12	67	236	157	79		740		1.9	NO						NO										1.67
10845374703	2011	YES	VIH		YES	NO	NO	2011	MWW	H	43	37	NonAIDS	3.49	3.49	346	333	67	2058	SIDEFF	INNTI	2N+1NN	13	14	55	28	27		2275	390	1.7	NO	449	1.7	NO					543	1.7	NO
10849082589	2013	YES	VIH&HEP	VHB	NO	NO	NO	2013	MWW	H	39	35	NonAIDS	4.06	4.06	563	563	55	1668		INNTI	2N+1NN	7	10	80	63	17		1480	633	1.6	YES												1058	1.6	YES
10849235177	2013	NO	VIH		YES	NO	NO	2013	MWM	H	48	48	NonAIDS	4.95	4.95	293	293	55	1673		INNTI	2N+1NN	20	7			27		182	470	2.82	NO				425	1.6		YES
10853400647	2012	YES	VIH		NO	NO	YES	2012	MWM	H	51	46	NonAIDS	6.38	5.93	414	375	32	966	Simplification	IPb	2N+1IPb	15	25	309	269	40		1922	282	3.68	NO	417	2.77	NO			YES						899	1.6	YES		1.6
10894236147	2011	YES	VIH		NO	NO	NO	2011	MWW	H	42	36	NonAIDS	3.76	4.6	401.5	509	3	100	Other	IPb	2N+1IPb	21	96	1992	1875	117		2465	458	4.13	NO				442	4.92	NO	NO	527	2.91	NO		618	3.41	NO		4.3
10894924402	2010	YES	VIH		NO	NO	YES	2010	MWM	H	64	57	NonAIDS	6.47	5.82	472	430.8	0	10	SIDEFF	INSTI	1II	22	298	1251	931	320		2682	756	3.32	NO	962	2.88	NO					789	1.7	NO	NO	1037	1.82	NO	3.11
10898020327	2012	YES	VIH		NO	NO	NO	2012	MWW	H	47	42	NonAIDS	3.31	3.53	537	449	0	21	Simplification	INNTI	2N+1NN	2	56	79	21	58		1897											1018	1.6	YES		759	1.6	YES
10914501369	2012	NO	VIH		NO	NO	YES	2012	MWM	H	33	28	NonAIDS	3.96	6.1	328	143	6	195	Simplification	IPb	2N+1IPb	11	1404	1550	135	1415		1854							303	1.76		NO
10914662659	2012	YES	VIH		NO	NO	NO	2012	Woman	F	25	20	NonAIDS	4.49	4.49	496	496	1	7	SIDEFF	IPb	2N+1IPb	23	0	109	86	23		1995	520	2.42	NO	671	1.7	NO	731	1.7	NO	NO				YES	682	1.6	YES	1.6	1.7
10920635461	2012	YES	VIH		NO	NO	NO	2012	Woman	F	22	17	NonAIDS	2.8	2.8	661.6	661.6	0	6	Other	IPb	2N+1IPb	2	0	583	581	2		2087
10933895349	2012	YES	VIH		NO	NO	NO	2012	MWM	H	50	45	NonAIDS	4.29	5.49	629	471	43	1299		INSTI	2N+1II	9	616	1096	471	625		1836
10944896876	2011	YES	VIH		YES	YES	NO	2011	Woman	F	39	33	NonAIDS	5.65	5.65	179	179	7	210	SIDEFF	IPb	2N+1IPb	7	9	183	167	16		2390	317	2.91	NO				309	1.7	NO	NO					525	1.7	NO		1.7
10950122654	2011	NO	VIH		NO	NO	NO	2011	MWW	H	40	34	NonAIDS	5.43	5.43	401	463	78	2369		IPb	2N+1IPb	9	37	1576	1530	46		2169															588	1.6	YES
10955006897	2010	YES	VIH		YES	NO	NO	2010	MWW	H	48	41	NonAIDS	2.56	3.77	326.2	362	36	1088	SIDEFF	INNTI	2N+1NN	22	862	1083	199	884		2645									NO						603	1.6	YES		2.92
10963246643	2010	YES	VIH		NO	NO	NO	2010	MWW	H	37	30	NonAIDS	4.24	4.24	376	244	6	186	Simplification	IPb	2N+1IPb	12	22	41	7	34		2861	573	1.8	NO	690	1.7	NO	633	1.7		NO				NO				1.7
10964443385	2011	YES	VIH		YES	NO	NO	2011	MWM	H	52	46	NonAIDS	6.34	5.83	244	244	0	8	SIDEFF	IPb	2N+1IPb	11	14	161	136	25		2409	398	3.17	NO				419	1.7		NO	508	1.7	NO
10969051539	2011	YES	VIH		NO	NO	NO	2011	MWM	H	63	57	NonAIDS	4.95	4.77	444	504	22	669	SIDEFF	IPb	2N+1IPb	7	89	362	266	96		2458	590	2.65	NO				696	1.7		NO	622	1.7	NO	NO				1.7
10969214141	2013	YES	VIH		NO	NO	YES	2013	MWM	H	31	27	NonAIDS	7.19	7.19	593	593	1	18	Other	IPb	2N+1IPb	7	5	189	177	12		1703	1555	2.84	NO				1756	1.6	YES	YES	1340	1.6	YES		1864	1.6	YES		1.6
10971096217	2010	YES	VIH		NO	NO	NO	2010	MWW	H	26	24	NonAIDS	4.75	4.75	523	343	78	2373		IPb	2N+1IPb	3	541	693	149	544		903	585	2.54	NO								745	1.7	NO
10973836779	2010	NO	VIH		YES	YES	NO	2010	Woman	F	40	39	AIDS	5.65	5.65	91	91	88	2676		IPb	2N+1IPb	2	5			7	2	333
10981328308	2013	YES	VIH		YES	NO	NO	2013	MWM	H	28	26	NonAIDS	4.68	4.68	306	306	13	389	Simplification	IPb	2N+1IPb	14	24			38		825	480	2.28	NO											YES				1.6
10998806182	2013	YES	VIH		ND	ND	NO	2012	Woman	F	26	21	AIDS		4.5		83.9	0	17	SIDEFF	IPb	2N+1IPb	385	4			389	385	1624		2.9	NO	116	4.58	NO									126	5.62	NO
10998806186	2013	YES	VIH		NO	NO	NO	2013	Woman	F	25	21	NonAIDS	1.98	2.29	985	850	6	203	Simplification	IPb	2N+1IPb	20	509	559	30	529		1505				811	1.6	YES
10998806187	2013	YES	VIH		NO	NO	NO	2013	MWM	H	32	28	NonAIDS	5.2	4.6	581	606	6	176	Simplification	INSTI	2N+1II	3	11	107	93	14		1617	836	1.6	YES	724	1.6	YES	784	1.6	YES	YES	661	1.6	YES	YES				1.6	1.6
10998806189	2013	YES	VIH		NO	NO	NO	2013	MWM	H	43	39	NonAIDS	5.6	5.3	928.7	942	5	151	SIDEFF	IPb	2N+1IPb	9	18	243	216	27		1553							1729	1.79	NO	NO					2246	1.6	YES		1.79
10998806205	2013	YES	VIH		NO	NO	NO	2013	MWM	H	49	46	NonAIDS	4.66	4.56	709	845	52	1559		INNTI	2N+1NN	9	47	175	119	56		1104	976	2.16	NO						YES		1298	1.6	YES						1.6
10998806209	2013	YES	VIH&HEP	VHC	YES	YES	NO	2013	MWW	H	40	36	NonAIDS	4.4	4.4	197.2	197.2	11	329	SIDEFF	IPb	2N+1IPb	16	7	404	381	23		1498		2.6	NO						NO					NO				4.69	3.32
10998806233	2013	YES	VIH		NO	NO	YES	2013	MWM	H	50	46	NonAIDS	4.4	3.92	432.6	424	4	117	Simplification	IPb	2N+1IPb	9	28	100	63	37		1561	556	2.35	NO				524	1.6	YES	YES	522	1.6	YES		557	1.6	YES		1.6
10998806260	2013	YES	VIH		NO	NO	NO	2013	MWM	H	33	29	NonAIDS	4.95	5.08	399	521	13	397	SIDEFF	IPb	2N+1IPb	0	21	418	397	21		1505	464	3.11	NO	276	1.6	YES	536	1.6	YES	YES					657	1.6	YES		1.6
10998806261	2013	YES	VIH&HEP	VHB	NO	NO	NO	2013	Woman	F	33	29	NonAIDS	3.68	3.68	404.9	404.9	10	311	Simplification	IPb	2N+1IPb	15	8	334	311	23		1455	549	1.96	NO						YES		654	1.6	YES		617	1.6	YES		1.6
10998806264	2013	YES	VIH		NO	NO	NO	2013	MWM	H	45	41	NonAIDS	4.5	4.29	947.3	716	6	183	SIDEFF	INNTI	2N+1NN	12	14	209	183	26		1510							659	1.6		YES	1036	1.6	YES		969	1.6	YES
10998806272	2013	YES	VIH		NO	NO	NO	2013	MWW	H	45	43	NonAIDS	4.4	4.35	550.2	549	20	627	Simplification	IPb	2N+1IPb	6	21			27		648
10998806281	2013	YES	VIH		YES	YES	NO	2013	MWW	H	69	65	NonAIDS	5.98	6.1	15	20.6	11	339	Simplification	IPb	2N+1IPb	15	9	363	339	24		1281		3.6	NO		2.8	NO		2.1		NO				YES				1.6
10998806289	2013	YES	VIH		NO	NO	YES	2013	MWM	H	53	49	NonAIDS	6.8	6.1	369	429	4	121	SIDEFF	INSTI	2N+1II	6	7	330	317	13		1431	590	2.34	NO				733	1.6		YES
10998806307	2013	YES	VIH		YES	YES	NO	2013	MWM	H	71	67	AIDS	4.1	4.8	20	20	12	367	SIDEFF	Other	2N+1IPb+1II	0	3	352	349	3	0	1527				14	2.2	NO								YES	68	1.6	YES	1.6
10998806311	2013	YES	VIH		NO	NO	NO	2013	MWM	H	29	25	NonAIDS	5.7	5.43	408	325	6	174	SIDEFF	INNTI	2N+1NN	22	21	510	467	43		1299	384	2.86	NO				748	1.62		NO	937	1.6	YES
10998806316	2013	YES	VIH		NO	NO	NO	2013	MWW	H	25	21	NonAIDS	4.31	4.35	429	457	15	448	Simplification	INSTI	2N+1II	8	152	218	58	160		1230									NO						601	1.6	YES		1.64
10998806320	2013	YES	VIH		NO	NO	YES	2013	MWW	H	52	48	NonAIDS	3.7	3.4	590	534	3	98	SIDEFF	INSTI	2N+1II	8	6	301	287	14		1441	735	1.6	YES	783	1.6	YES					686	1.6	YES		714	1.6	YES
10998806321	2013	YES	VIH		YES	NO	NO	2013	MWM	H	51	47	NonAIDS	4.8	4.8	221	221	49	1480		INNTI	2N+1NN	20	17	727	690	37		1367	335	3.34	NO				363	2.2		NO	407	2.15	NO		539	1.6	YES
10998806323	2013	YES	VIH		NO	NO	NO	2013	Woman	F	34	32	NonAIDS	5.64	5.64	389.4	389.4	6	175	Simplification	IPb	2N+1IPb	12	12	235	211	24		552	555	3.41	NO				586	1.8		NO				YES				1.6
10998806325	2013	NO	VIH&HEP	VHC	ND	ND	NO	2010	MWW	H	42	35	NonAIDS		3.8		700.1	7	218	Other	INNTI	2N+1NN	1139	104	1384	141	1243		1318
10998806328	2013	YES	VIH&HEP	VHC	NO	NO	NO	2013	MWW	H	53	49	NonAIDS	4.4	4.24	614	725	4	117	SIDEFF	INNTI	2N+1NN	22	119	258	117	141		1483	825	1.68	NO				1048	1.6	YES	YES					1144	1.6	YES		1.6
10998806351	2013	YES	VIH		YES	NO	NO	2013	Woman	F	51	47	NonAIDS	4.93	4.93	294	294	10	314	Simplification	IPb	2N+1IPb	9	15	121	97	24		1439	448	2.83	NO	450	1.6	YES	573	1.6		YES				YES				1.6
10998806352	2013	NO	VIH		NO	NO	NO	2013	Woman	F	20	19	NonAIDS	3.41	3.13	484	675	44	1335		INNTI	2N+1NN	7	135	198	56	142		191
10998806353	2013	YES	VIH		NO	NO	NO	2013	MWM	H	25	21	NonAIDS	3.7	3.7	713	713	47	1406		INNTI	2N+1NN	6	64	189	119	70		1429							645	1.6	YES	YES	977	1.6	YES		937	1.6	YES		1.6
10998806371	2014	YES	VIH		YES	NO	NO	2013	Woman	F	37	33	NonAIDS	3.89	4.14	348	478	11	336	SIDEFF	INNTI	2N+1NN	22	51	169	96	73		1395				417	1.6	YES			YES						548	1.6	YES		1.6
10998806373	2014	YES	VIH		YES	NO	NO	2013	MWM	H	53	49	NonAIDS	5.2	4.06	335.2	339	11	320	Simplification	IPb	2N+1IPb	31	0	204	173	31		1405	399	2.23	NO	377	1.93	NO	336	1.6	YES	YES	362	1.6	YES		126	1.6	YES		1.6
10998806382	2014	YES	VIH		NO	NO	NO	2014	MWM	H	46	43	NonAIDS	4.7	4.86	450	645	46	1389		INNTI	2N+1NN	6	49	181	126	55		1274	760	2.8	NO						YES		810	1.6	YES		986	1.6	YES		1.6
10998806390	2014	YES	VIH		NO	NO	NO	2014	MWM	H	28	25	NonAIDS	5.1	4.27	755.5	466	30	924	Simplification	IPb	2N+1IPb	11	30	307	266	41		1379	584	2.28	NO						NO		458	1.6	YES						1.62
10998806392	2014	YES	VIH&HEP	VHC	NO	NO	NO	2014	MWM	H	37	34	NonAIDS	4.42	3.92	1233	1233	45	1357		INNTI	2N+1NN	8	70	107	29	78		1413	1162	1.6	YES				1035	1.6		YES	1208	1.6	YES	YES				1.6
10998806396	2014	YES	VIH		NO	NO	NO	2014	MWM	H	40	37	NonAIDS	5.98	5.82	384	371	12	384	Simplification	IPb	2N+1IPb	3	32	398	363	35		1421	540	3.36	NO				736	1.6		YES	484	1.6	YES
10998806401	2014	YES	VIH		YES	YES	NO	2014	MWW	H	31	28	NonAIDS	5.7	5.7	136.7	94	13	376	SIDEFF	IPb	2N+1IPb	8	7	300	285	15		1330	158	2.77	NO				286	1.82	NO	NO	290	1.6	YES						1.82
10998806404	2014	YES	VIH&HEP	VHB	NO	NO	NO	2014	Woman	F	37	34	NonAIDS	3.7	2.38	716.1	635	5	147	Simplification	IPb	2N+1IPb	0	175	287	112	175		1381							1092	1.6	NO	YES				YES	593	1.86	NO	1.6	1.91
10998806410	2013	YES	VIH		YES	YES	NO	2013	MWW	H	36	32	AIDS	6.1	6.1	32.1	32.1	28	841	Simplification	IPb	2N+1IPb	0	23	514	491	23	0	1452								2.2	NO	NO									2
10998806412	2013	YES	VIH		NO	NO	NO	2013	MWM	H	32	28	NonAIDS	3.74	4.56	1475	1164	10	306	SIDEFF	INNTI	2N+1NN	4	115	245	126	119		1361									NO										2.26
10998806413	2014	YES	VIH		NO	NO	YES	2014	MWM	H	58	55	NonAIDS	5.64	5.67	420	458	20	583	Simplification	IPb	2N+1IPb	16	5	85	64	21		1177	440	3	NO	326	2.25	NO			YES		544	1.6	YES						1.6
10998806424	2014	YES	VIH		YES	YES	NO	2014	Woman	F	39	36	AIDS	6.1	6.1	187.5	187.5	10	305	Simplification	IPb	2N+1IPb	0	21	536	515	21	525	1390	281	3.84	NO						NO		387	1.6	YES		309	1.6	YES		1.9
10998806430	2014	NO	VIH		YES	YES	NO	2014	MWM	H	33	32	NonAIDS	4.98	5.2	89	107.4	1	33	SIDEFF	Other	2N+1IPb+1IE	20	15			35		351	179	4.28	NO		1.7	NO			NO					YES				1.6	1.9
10998806437	2014	YES	VIH		YES	NO	NO	2014	MWM	H	26	23	NonAIDS	5.31	5.31	226	226	28	868	Simplification	INSTI	2N+1II	33	14	551	504	47		1358	334	2.11	NO
10998806439	2014	YES	VIH		NO	NO	YES	2014	MWM	H	47	44	NonAIDS	5.5	4.28	314	314	18	537	Simplification	INSTI	2N+1II	9	2	101	90	11		1365	550	1.6	YES	623	1.6	YES	655	1.6	YES	YES	628	1.6	YES	YES	603	1.6	YES	1.6	1.6
10998806442	2014	YES	VIH		YES	YES	NO	2014	Woman	F	42	39	AIDS	6.37	6.37	93	93	29	873	Simplification	IPb	2N+1IPb	5	2	613	606	7	0	1309	227	3.97	NO				383	2.38	NO	NO	593	1.6	YES	YES				1.6	2.38
10998806444	2014	NO	VIH		YES	NO	NO	2014	MWM	H	23	22	NonAIDS	4.66	4.66	276	276	45	1369		INNTI	2N+1NN	15	7			22		327
10998806454	2014	YES	VIH		NO	NO	NO	2014	MWM	H	23	20	NonAIDS	3.54	4.37	582	529	42	1252		INNTI	2N+1NN	3	112	234	119	115		1304	552	2.11	NO				739	1.6	NO	YES									1.79
10998806455	2014	YES	VIH		NO	NO	NO	2014	MWW	H	30	27	NonAIDS	4.45	4.45	437	383	44	1323		INNTI	2N+1NN	7	40	161	114	47		1190
10998806462	2014	YES	VIH		YES	NO	NO	2014	MWW	H	39	36	NonAIDS	4.6	4.5	201.6	194.9	43	1299		INNTI	2N+1NN	19	58	166	89	77		1304		2.3	NO	241	1.6	YES	370	1.6	YES	YES	361	1.6	YES						1.6
10998806472	2014	YES	VIH		NO	NO	YES	2014	MWM	H	45	42	NonAIDS	5.28	4.25	690	810	9	282	SIDEFF	IPb	2N+1IPb	28	0	219	191	28		1281	660	2.73	NO	814	1.89	NO	1000	1.6		YES	914	1.6	YES		930	1.6	YES
10998806475	2014	YES	VIH		NO	NO	YES	2014	MWM	H	33	30	NonAIDS	5.64	5.64	441	441	18	544	Simplification	INSTI	2N+1II	0	23	301	278	23		1309	529	2.14	NO				582	1.6		YES	550	1.6	YES		534	1.6	YES
10998806478	2014	YES	VIH		NO	NO	NO	2014	MWM	H	33	30	NonAIDS	5.76	5.76	569	569	19	578	SIDEFF	IPb	2N+1IPb	18	38	453	397	56		1309	547	3.58	NO	583	2.44	NO	427	1.7		NO					836	1.6	YES
10998806481	2014	NO	VIH&HEP	VHB	NO	NO	NO	2014	MWM	H	35	35	NonAIDS	4.08	4.08	575	575	43	1295		INNTI	2N+1NN	26	42			68		42
10998806494	2014	YES	VIH		YES	YES	NO	2014	MWW	H	66	63	AIDS	5.7	5.7	118	118	8	259	Simplification	Other	2N+1IPb+1II	0	6	82	76	6	0	1239	183	1.6	YES	173	1.6	YES	151	1.6		YES	273	1.6	YES	YES	65	1.6	YES	1.6
10998806500	2014	YES	VIH		NO	NO	YES	2014	MWM	H	30	29	NonAIDS	6.59	5.26	731	731	15	457	Simplification	INSTI	2N+1II	2	12	70	56	14		469	712	1.99	NO	949	1.6	YES	800	1.6		YES	754	1.6	YES	YES				1.6
10998806509	2014	YES	VIH		YES	YES	NO	2014	MWM	H	58	55	NonAIDS	4.82	5.05	163	200	5	166	SIDEFF	INSTI	2N+1II	15	23	144	106	38		1227	460	1.62	NO				519	1.6		YES
10998806516	2014	YES	VIH		YES	YES	NO	2014	MWW	H	48	45	NonAIDS	5.87	5.87	98	98	42	1272		IPb	2N+1IPb	21	14	541	506	35		1253	358	4.05	NO	303	2.92	NO			NO		337	1.6	YES						2.37
10998806575	2014	YES	VIH		NO	NO	YES	2014	MWM	H	31	28	NonAIDS	5.9	6.36	331	331	18	551	Simplification	IPb	2N+1IPb	9	2	227	216	11		1148				643	1.67	NO									636	1.6	YES
10998806576	2014	YES	VIH		NO	NO	NO	2014	Woman	F	28	25	NonAIDS	2.6	1.91	721.2	355	21	613		IPb	2N+1IPb	15	604	554	-65	619		1064	432	1.62	NO	377	1.6	YES
10998806578	2014	YES	VIH		NO	NO	NO	2014	MWM	H	27	24	NonAIDS	4.1	3.94	1141.3	742	39	1188		INNTI	2N+1NN	21	28	168	119	49		1013	967	2.11	NO				1271	1.6	YES	YES	1374	1.6	YES						1.6
10998806586	2014	YES	VIH		NO	NO	YES	2014	MWM	H	47	44	NonAIDS	5.14	5.75	730	730	33	994	Simplification	INSTI	2N+1II	19	9	293	265	28		1094											843	1.6	YES		852	1.6	YES
10998806588	2014	YES	VIH		YES	YES	NO	2014	MWM	H	56	53	AIDS	6.59	6.6	184	116	17	505	Other	IPb	2N+1IPb	3	5	240	232	8	0	1091		3.7	NO		2.8	NO		1.7	NO	NO									1.7
10998806597	2014	YES	VIH		YES	NO	NO	2014	MWM	H	32	29	NonAIDS	4.46	4.46	314	314	5	157	Simplification	IPb	2N+1IPb	7	14	178	157	21		1053	560	2.39	NO	471	1.71	NO			YES						609	1.6	YES		1.6
10998806604	2014	YES	VIH		NO	NO	YES	2014	MWM	H	24	21	NonAIDS	4.43	4.43	520	520	34	1026		INSTI	2N+1II	3	0	85	82	3		1183	463	1.84	NO	385	1.6	YES	541	1.6	YES	YES	478	1.6	YES	YES	533	1.6	YES	1.6	1.6
10998806605	2014	YES	VIH		NO	NO	NO	2014	Woman	F	26	23	NonAIDS	1.6	1.6	1251	871	3	93	Other	Other	1IPb	12	551	12	-551	563		1006											864	1.6	YES
10998806612	2014	YES	VIH		NO	NO	YES	2014	MWM	H	54	51	NonAIDS	6.99	5.55	360	331	9	269	Simplification	INSTI	2N+1II	6	11	501	484	17		1141	621	2.31	NO	591	1.6	YES	676	1.6		YES	722	1.6	YES
10998806620	2014	YES	VIH		NO	NO	NO	2014	MWM	H	27	24	NonAIDS	4.8	4.64	704	454	1	14	SIDEFF	INNTI	2N+1NN	1	47	141	93	48		1139											621	1.6	YES	YES				1.3
10998806621	2014	YES	VIH		NO	NO	NO	2014	Woman	F	41	38	NonAIDS	4.1	4.24	509.9	431	36	1078		IPb	2N+1IPb	2	102	232	128	104		1084							1042	1.6		YES
10998806649	2014	YES	VIH		YES	NO	NO	2014	Woman	F	80	78	NonAIDS	3.56	3.56	218	218	14	450	SIDEFF	INSTI	2N+1II	12	0	40	28	12		763	176	1.6	YES	166	1.6	YES
10998806651	2014	NO	VIH		NO	NO	YES	2014	MWM	H	25	25	NonAIDS	7	7	532	532	38	1137		INSTI	2N+1II	11	14			25		26
10998806654	2014	YES	VIH		NO	NO	NO	2014	Woman	F	59	56	NonAIDS	4.1	4.1	1140	1140	18	546	Simplification	INSTI	2N+1II	21	11	113	81	32		1026				1919	1.6	YES					1924	1.6	YES		1933	1.6	YES
10998806665	2012	NO	VIH		NO	NO	NO	2012	MWM	H	33	28	NonAIDS	4.06	4.21	751	666.4	34	1045	Other	INSTI	2N+1II	60	1006	1158	92	1066		2051	833	1.6	YES	963	1.6	YES	841	1.6		YES
10998806674	2014	YES	VIH		YES	NO	NO	2014	MWM	H	28	25	NonAIDS	4.67	4.67	344	344	30	911	Other	INSTI	2N+1II	2	8	800	790	10		1069	761	1.6	YES								827	1.6	YES	YES	813	1.6	YES	1.6
10998806693	2014	YES	VIH		ND	ND	NO	2010	Woman	F	31	24	NonAIDS		3.43		268	7	198	Simplification	IPb	2N+1IPb	1473	0	1573	100	1473		1078	296	1.6	YES	299	1.6	YES
10998806694	2014	YES	VIH		NO	NO	NO	2014	Woman	F	28	25	NonAIDS	3.3	2.96	486.7	593	1	55	Simplification	IPb	2N+1IPb	13	2	95	80	15		1049	537	1.6	YES	609	1.6	YES			YES		648	1.6	YES						1.6
10998806696	2015	YES	VIH		YES	NO	NO	2014	MWW	H	52	49	NonAIDS	5.17	5.17	248	248	3	90	SIDEFF	IPb	2N+1IPb	21	15	154	118	36		1008	300	2.58	NO	265	2.37	NO	269	1.6		YES					304	1.6	YES
10998806709	2015	YES	VIH		NO	NO	NO	2014	MWM	H	29	27	NonAIDS	3.03	3.03	543	543	3	84	SIDEFF	INNTI	2N+1NN	64	11	131	56	75		714	678	1.6	YES	837	1.6	YES	694	1.6	YES	YES					619	1.6	YES		1.6
10998806724	2015	YES	VIH		NO	NO	NO	2015	MWM	H	40	38	NonAIDS	3.75	4.13	500	576	34	1035		INNTI	2N+1NN	6	34	228	188	40		987							627	1.6		YES
10998806731	2015	NO	VIH		ND	ND	NO	2015	MWW	H	39	38	NonAIDS					11	324	SIDEFF	INNTI	2N+1NN	10	10			20		348								1.6		YES				NO				1.88
10998806748	2015	YES	VIH		NO	NO	NO	2015	MWW	H	40	38	NonAIDS	4.3	4.3	377.6	377.6	25	754	Other	IPb	2N+1IPb	0	20			20		997		2.1	NO						NO						467	4.14	NO		4.4
10998806761	2015	YES	VIH		NO	NO	YES	2015	MWM	H	40	38	NonAIDS	6.1	4.07	446	670	35	1062		INSTI	2N+1II	4	11	71	56	15		929	712	1.6	YES	1010	1.6	YES	759	1.6	YES	YES		1.6	YES	YES	897	1.6	YES	1.6	1.6
10998806775	2015	YES	VIH		NO	NO	NO	2015	MWM	H	49	47	AIDS	4	3.61	510	472	8	249	Simplification	INSTI	2N+1II	26	16	109	67	42	124	993	493	1.6	YES	643	1.6	YES	457	1.6	YES	YES					726	1.6	YES		1.6
10998806783	2015	YES	VIH		NO	NO	YES	2015	Woman	F	47	45	NonAIDS	5.3	5.6	535	604	18	566	Simplification	INSTI	2N+1II	7	7	188	174	14		951	788	2.21	NO	775	1.89	NO	945	1.6	YES	YES	581	1.6	YES	YES	1077	1.6	YES	1.6	1.6
10998806784	2014	YES	VIH&HEP	VHC	YES	YES	NO	2014	MWW	H	43	40	AIDS	4.5	4.5	310.5	362	44	1332		INSTI	2N+1II	0	50	137	87	50	0	1340	291	2	NO						YES						545	1.6	YES		1.6
10998806785	2015	YES	VIH		NO	NO	YES	2015	MWW	H	51	49	NonAIDS	7	7	286	286	8	266	Simplification	INSTI	2N+1II	12	7	107	88	19		894	544	1.65	NO	764	1.6	YES	646	1.6		YES	847	1.6	YES			1.6	YES
10998806790	2015	YES	VIH		NO	NO	YES	2015	MWM	H	33	31	NonAIDS	5.1	5.1	295	295	29	889	SIDEFF	INSTI	2N+1II	8	14	76	54	22		949							647	1.6	YES	YES	672	1.6	YES	YES	653	1.6	YES	1.6	1.6
10998806794	2015	NO	VIH		NO	NO	YES	2015	MWM	H	22	22	NonAIDS	5.12	5.1	780	659	32	975		INSTI	2N+1II	4	14			18		69
10998806801	2015	YES	VIH		NO	NO	NO	2015	MWW	H	38	36	NonAIDS	5.6	5.13	784	621	8	266	Simplification	IPb	2N+1IPb	11	11	189	167	22		945	806	2.84	NO	778	1.6	YES	1211	1.6	YES	YES	954	1.6	YES	YES				1.6	1.6
10998806804	2015	YES	VIH		NO	NO	YES	2015	MWW	H	58	56	NonAIDS	4.83	4.83	656	656	24	731	Other	INSTI	2N+1II	11	6	47	30	17		919	767	1.6	YES	718	1.6	YES	784	1.6	YES	YES	813	1.6	YES	YES	834	1.6	YES	1.6	1.6
10998806805	2015	YES	VIH		ND	ND	NO	2014	MWW	H	26	23	NonAIDS		4.34		450.7	4	119	Simplification	INSTI	2N+1II	125	21	195	49	146		952		1.6	YES						YES										1.6
10998806807	2015	YES	VIH		YES	NO	NO	2015	MWM	H	54	52	NonAIDS	4.6	4.85	296	353	3	99	Simplification	INSTI	2N+1II	7	21	187	159	28		964	391	1.6	YES	715	1.6	YES			YES										1.6
10998806820	2015	YES	VIH&HEP	VHC	YES	NO	NO	2015	MWW	H	52	50	NonAIDS	4.56	4.56	201	201	10	301	Simplification	IPb	2N+1IPb	9	7	220	204	16		854	285	2.44	NO	351	1.86	NO								YES				1.6
10998806832	2015	YES	VIH		NO	NO	NO	2015	MWM	H	45	43	NonAIDS	3.97	3.97	362	362	31	929		INNTI	2N+1NN	6	14	244	224	20		793											634	1.6	YES
10998806835	2015	YES	VIH		NO	NO	NO	2015	MWM	H	46	44	NonAIDS	4.81	5.06	398	393	7	209	Simplification	INSTI	2N+1II	7	9	76	60	16		873	745	1.64	NO
10998806843	2015	YES	VIH		NO	NO	YES	2015	Woman	F	36	34	NonAIDS	6.7	6.44	846	695	6	176	Other	INSTI	2N+1II	1	4	102	97	5		908	977	1.6	YES	1079	1.6	YES	1064	1.6	YES	YES	1117	1.6	YES	YES	1241	1.6	YES	1.6	1.6
10998806846	2015	YES	VIH		YES	YES	NO	2015	MWW	H	34	32	NonAIDS	5.13	5.13	161	161	3	69	SIDEFF	INSTI	2N+1II	5	7	81	69	12		769	236	1.92	NO				334	1.6	YES	YES									1.6
10998806854	2015	YES	VIH&HEP	VHB	YES	YES	NO	2015	MWW	H	40	38	NonAIDS	5.94	5.94	70	70	10	302	SIDEFF	IPb	2N+1IPb	9	5			14		874	113	2.87	NO								167	1.76	NO
10998806866	2015	YES	VIH		YES	NO	NO	2015	Woman	F	46	44	NonAIDS	4.4	4.2	208	171	7	206	Simplification	IPb	2N+1IPb	9	7	170	154	16		728	242	2.36	NO						YES		471	1.6	YES						1.6
10998806871	2015	YES	VIH		NO	NO	NO	2015	MWM	H	56	54	NonAIDS	4.81	4.81	383	383	30	892		INSTI	2N+1II	10	7	167	150	17		721	513	1.85	NO						YES		563	1.6	YES						1.6
10998806878	2015	YES	VIH		NO	NO	YES	2015	MWM	H	47	45	NonAIDS	6.57	6.57	246	246	6	178	Simplification	INSTI	2N+1II	3	4	99	92	7		873	584	2.18	NO	377	1.6	YES	514	1.6	YES	YES	603	1.6	YES	YES				1.6	1.6
10998806879	2015	YES	VIH		YES	YES	NO	2015	MWM	H	40	38	AIDS	5.43	5.43	24	24	30	887		INSTI	2N+1II	24	5	164	135	29	24	789
10998806880	2015	YES	VIH		NO	NO	NO	2015	MWM	H	21	19	NonAIDS	4.63	4.63	455	455	22	669	Other	INSTI	2N+1II	49	7	168	112	56		676									YES										1.6
10998806890	2015	YES	VIH		NO	NO	YES	2015	MWM	H	36	34	NonAIDS	5.79	5.79	323	323	8	256	Simplification	INSTI	2N+1II	3	3	262	256	6		868	340	1.86	NO	544	1.6	YES	306	1.6	YES	YES				YES	527	1.6	YES	1.6	1.6
10998806894	2015	NO	VIH		YES	NO	NO	2015	MWM	H	39	38	NonAIDS	4.5	4.44	283	283	29	872		INNTI	2N+1NN	3	7	87	77	10		315							494	1.6	YES	YES									1.6
10998806898	2015	YES	VIH		NO	NO	NO	2015	MWM	H	45	43	NonAIDS	4.28	4.28	615	615	1	28	SIDEFF	INSTI	2N+1II	0	15	273	258	15		651
10998806916	2015	YES	VIH		NO	NO	YES	2015	MWW	H	21	19	NonAIDS	6.5	6.5	292.3	292.3	6	195	Other	INSTI	2N+1II	6	0	427	421	6		800							320	4.88	NO	NO					497	1.63	NO		4.88
10998806926	2015	YES	VIH		ND	ND	NO	2015	Woman	F	53	51	NonAIDS		4.5		345.3	28	826		IPb	2N+1IPb	174	18	622	430	192		810	375	2.1	NO	387	1.6	YES	425	1.6	NO	YES	605	1.79	NO	YES	519	1.6	YES	1.6	4.5
10998806927	2015	YES	VIH		NO	NO	NO	2015	MWM	H	26	24	NonAIDS	4.96	4.96	945	945	1	31	SIDEFF	INSTI	2N+1II	5	8	128	115	13		659	1035	1.76	NO						YES					YES				1.6	1.6
10998806930	2015	YES	VIH		NO	NO	NO	2015	Woman	F	21	19	NonAIDS	4.12	4.12	420	420	28	825		INSTI	2N+1II	11	18	57	28	29		770	610	1.6	YES				649	1.6		YES	657	1.6	YES		724	1.6	YES
10998806931	2015	YES	VIH		NO	NO	NO	2015	MWM	H	26	24	NonAIDS	4.14	4.14	484	484	28	832		INSTI	2N+1II	2	11	41	28	13		689	638	1.6	YES				728	1.6	YES	YES	754	1.6	YES		817	1.6	YES		1.6
10998806932	2015	NO	VIH		NO	NO	NO	2015	MWM	H	23	22	NonAIDS	2.94	2.94	500	500	28	833		INSTI	2N+1II	4	7	25	14	11		253	616	1.6	YES
10998806936	2015	YES	VIH		NO	NO	NO	2015	MWM	H	47	45	NonAIDS	3.75	3.75	512	512	21	624	Other	INSTI	2N+1II	5	6	40	29	11		835	671	1.6	YES	878	1.6	YES	950	1.6	YES	YES	846	1.6	YES						1.6
10998806941	2015	YES	VIH		NO	NO	NO	2015	Woman	F	28	26	NonAIDS	4.1	4.1	499.3	689	28	838		IPb	2N+1IPb	23	68	224	133	91		747	759	1.6	YES								1046	1.6	YES	YES				1.6
10998806945	2015	YES	VIH		YES	YES	NO	2015	MWW	H	57	55	NonAIDS	4.31	4.31	172	172	27	819		INSTI	2N+1II	6	11	49	32	17		795	257	1.6	YES
10998806948	2015	YES	VIH		ND	ND	NO	2015	MWW	H	54	52	NonAIDS		6.29		252	15	447	Simplification	IPb	2N+1IPb	98	16			114		809	311	3.38	NO	319	2.61	NO			NO		333	1.6	YES		406	1.47	YES		2.76
10998806967	2015	YES	VIH		YES	NO	NO	2015	Woman	F	31	29	NonAIDS	3.89	3.89	202	202	24	714	SIDEFF	INSTI	2N+1II	2	11	22	9	13		770	288	1.6	YES	351	1.6	YES	371	1.6	YES	YES	390	1.6	YES	YES				1.6	1.6
10998806969	2015	YES	VIH&HEP	VHC	NO	NO	NO	2015	Woman	F	67	65	NonAIDS	5.75	5.75	619	619	26	777		IPb	2N+1IPb	6	32	381	343	38		753	668	3.03	NO						NO										1.9
10998806971	2015	YES	VIH		YES	YES	NO	2015	Woman	F	37	35	NonAIDS	4.35	4.35	85	85	27	801		IPb	2N+1IPb	5	4	38	29	9		740	54	1.6	YES				103	1.6	YES	YES	141	1.66	NO						1.6
10998806972	2015	YES	VIH		NO	NO	YES	2015	MWM	H	47	45	NonAIDS	7	7	267	200	21	645	Simplification	IPb	2N+1IPb	5	5			10		757	622	4.06	NO	665	3.39	NO	667	2.19	NO	NO	632	1.71	NO	NO	609	1.5	YES	1.71	2.19
10998806975	2015	NO	VIH		NO	NO	YES	2015	MWM	H	21	20	NonAIDS	4.55	4.55	448	448	27	797		INSTI	2N+1II	0	5	33	28	5		231	600	1.6	YES	664	1.88	NO	639	1.6	YES	YES									1.6
10998806987	2015	YES	VIH		YES	NO	NO	2015	MWW	H	65	63	NonAIDS	4.9	4.68	245.3	183	26	781		Other	1IPb+1II	34	3	56	19	37		782		2.1	NO				348	1.6		YES				YES				1.6
10998806988	2015	YES	VIH		NO	NO	NO	2015	Woman	F	41	39	NonAIDS	3.77	3.77	405	405	1	23	Other	IPb	2N+1IPb	8	7	120	105	15		679							533	1.6	YES	YES					833	1.5	YES		1.6
10998806991	2015	YES	VIH		NO	NO	NO	2015	MWM	H	30	28	NonAIDS	4.8	4.3	756.4	440	1	29	Simplification	INSTI	2N+1II	8	4	76	64	12		470	726	1.82	NO	524	1.6	YES
10998806994	2015	YES	VIH		YES	NO	NO	2015	MWW	H	37	35	NonAIDS	5.05	5.05	337	337	26	769		INSTI	2N+1II	9	8	222	205	17		703											664	1.6	YES
10998807013	2015	YES	VIH		YES	NO	NO	2015	MWW	H	50	48	AIDS	5.8	5.8	404.5	404.5	18	550	Other	INSTI	2N+1II	1	56	236	179	57	0	832					2.5	NO	265	1.6	NO	YES					435	4.5	NO		1.83
10998807017	2010	YES	VIH		NO	NO	NO	2010	Woman	F	28	21	NonAIDS	3.92	4.24	902	1006.2	2	34	Other	IPb	2N+1IPb	4	727	1032	301	731		2694
10998807022	2015	YES	VIH		YES	NO	NO	2015	Woman	F	25	23	NonAIDS	3.49	3.49	213	213	18	532	Other	IPb	2N+1IPb	13	6	103	84	19		699	267	1.6	YES	408	1.6	YES	358	1.6	YES	YES					467	1.5	YES		1.6
10998807026	2015	YES	VIH		NO	NO	NO	2015	MWW	H	21	20	NonAIDS	4.03	4.03	509	509	1	27	Simplification	INSTI	2N+1II	8	26	117	83	34		378	544	1.6	YES	656	1.6	YES			YES					YES				1.6	1.6
10998807027	2015	YES	VIH&HEP	VHB	ND	ND	NO	2015	MWM	H	62	60	NonAIDS		4.77		289	13	392	Failure	INSTI	2N+1II	126	10	178	42	136		678				444	1.6	YES	355	2.46	YES	NO	257	2.25	NO	NO	249	1.48	YES	2.48	1.6
10998807040	2015	YES	VIH		YES	YES	NO	2015	MWM	H	46	44	NonAIDS	5.3	5.19	75.9	54	24	727		INSTI	2N+1II	12	12			24		707	131	2.19	NO	87	1.66	NO	179	1.84	YES	NO	181	1.6	YES						1.6
10998807042	2015	YES	VIH		YES	YES	NO	2015	MWW	H	39	37	NonAIDS	5.3	5.3	161	161	10	295	Simplification	INSTI	2N+1II	6	22	323	295	28		678									YES		317	1.6	YES						1.6
10998807051	2016	YES	VIH		NO	NO	YES	2015	MWM	H	25	23	NonAIDS	6.1	5.49	477.2	585	1	28	Simplification	IPb	2N+1IPb	16	0	114	98	16		614	729	3.23	NO	753	1.6	YES									998	1.48	YES
10998807057	2016	YES	VIH		NO	NO	NO	2015	Woman	F	33	31	NonAIDS	4.4	4.4	484	484	6	182	Simplification	IPb	2N+1IPb	15	13	153	125	28		447									NO										1.79
10998807111	2016	YES	VIH		ND	ND	NO	2012	MWM	H	24	19	NonAIDS		3.23		958	22	660		INSTI	2N+1II	1244	14	1293	35	1258		595	1208	1.6	YES
10998807162	2016	NO	VIH		ND	ND	NO	2015	MWM	H	34	32	NonAIDS		5.47		190	21	619		INSTI	2N+1II	196	15			211		624	376	1.9	NO
10998807296	2016	NO	VIH		ND	ND	NO	2015	MWM	H	38	36	NonAIDS		3.96		368	4	122	Other	INSTI	2N+1II	528	14	850	308	542		364											950	1.48	YES
10998807328	2016	YES	VIH		ND	ND	NO	2013	Woman	F	66	62	NonAIDS		3.2		419.2	14	425		INSTI	2N+1II	1072	42	1142	28	1114		448		1.6	YES
10998807592	2016	YES	VIH		ND	ND	NO	2013	MWW	H	51	47	NonAIDS		4.9		316	8	216		INSTI	2N+1II	993	452			1445		466
10998807680	2010	YES	VIH&HEP	VHC	YES	NO	NO	2010	MWW	H	34	27	NonAIDS	4.83	4.83	234	234	36	1099	Simplification	IPb	2N+1IPb	8	22	219	189	30		2422	402	2.16	NO	456	1.73	NO	441	1.6		YES
50000002727	2010	YES	VIH		YES	YES	NO	2010	MWW	H	44	37	AIDS	6.26	6.26	58	58	46	1401	Simplification	IPb	2N+1IPb	2	0	369	367	2		2862	237	3.9	NO	197	2.27	NO					269	1.3	YES	YES	311	1.6	YES	1.3
50000002728	2010	NO	VIH		YES	YES	NO	2010	MWW	H	60	60	AIDS	5.07	5.07	172	172	3	68	Other	IPb	2N+1IPb	1	0			1	0	68	213	2.73	NO
50000002731	2010	YES	VIH		NO	NO	NO	2010	MWW	H	47	40	NonAIDS	4.43	4.24	557	498	18	567	Simplification	IPb	2N+1IPb	11	553	690	126	564		2849														NO	974	1.6	YES	3.79
50000002746	2010	YES	VIH		YES	NO	NO	2010	MWW	H	50	43	NonAIDS	4.67	5.49	340	264	10	301	Other	IPb	2N+1IPb	15	182	372	175	197		2763														YES	495	1.6	YES	1.6
50000002747	2010	NO	VIH		YES	YES	NO	2010	Woman	F	24	24	NonAIDS	5.82	5.46	10	10	93	2820		IPb	2N+1IPb	13	0			13		28	54	3.48	NO
50000002751	2010	YES	VIH		NO	NO	NO	2010	MWW	H	62	55	NonAIDS	6.23	5.71	395	341	24	714	Other	Other	2N+1IPb+1II+1IE	2	11	188	175	13		2601	382	2.39	NO	371	1.49	YES	348	1.3	YES	YES	564	1.6	YES	YES	437	1.6	YES	1.6	1.3
50000002752	2010	YES	VIH		NO	NO	NO	2010	MWW	H	70	63	NonAIDS	4.92	1.6	533	655	48	1455	SIDEFF	INNTI	2N+1NN	0	505	231	-274	505		2634				874	1.6	YES			NO						822	1.6	YES		2.42
50000002754	2010	YES	VIH		NO	NO	NO	2010	MWW	H	57	53	NonAIDS	4.56	4.06	492	396	25	752	Simplification	Other	1IPb+1II	11	233	300	56	244		1318	489	1.81	NO	557	1.6	YES	609	1.6		YES				YES	685	1.6	YES	1.6
50000002758	2010	YES	VIH		YES	YES	NO	2010	MWM	H	43	36	NonAIDS	4.99	4.9	171	221	5	139	SIDEFF	IPb	2N+1IPb	17	35	290	238	52		2493									NO		497	1.6	YES						2.04
50000002760	2010	YES	VIH		NO	NO	NO	2010	Woman	F	39	33	NonAIDS	6.44	6.18	361	284	24	742	SIDEFF	Other	2N+1NN+1II	6	84	1161	1071	90		2268	349	3.16	NO
50000002761	2010	YES	VIH		NO	NO	NO	2010	MWM	H	55	48	NonAIDS	5.03		467	188	6	188	Other	Other	2N+1NN+1II	7	183	378	188	190		2514				693	1.6	YES	521	1.6		YES				YES				1.6
50000002763	2010	NO	VIH		YES	NO	NO	2010	Woman	F	31	30	NonAIDS		4.12	299	219	0	7	Other	IPb	2N+1IPb	48	168			216		308	434	2.11	NO											NO				2.37
50000002764	2010	YES	VIH		ND	ND	NO	2010	MWM	H	49	44	NonAIDS	3.2	3.42		405	22	659	Other	Other	1IPb+1II	88	352	503	63	440		1739	471	1.6	YES												509	1.6	YES
50000002765	2010	YES	VIH		NO	NO	NO	2010	MWM	H	25	21	NonAIDS	6.99	5.59	388	512	89	2708		IPb	2N+1IPb	0	11	194	183	11		1433	636	3.41	NO	701	2.81	NO	660	1.6	YES	YES	658	1.6	YES	YES	623	1.6	YES	1.6	1.6
50000003342	2011	YES	VIH&HEP	VHC	NO	NO	NO	2011	MWM	H	50	44	NonAIDS	4.43	3.3	686	796	48	1439		INNTI	2N+1NN	27	776	893	90	803		2029				797	1.6	YES
50000004210	2010	NO	VIH		YES	YES	NO	2010	MWW	H	50	43	AIDS	6.68	6.36	46	42	11	323	Failure	IPb	2N+1IPb	30	0	1648	1618	30	30	2710														NO				3.56
50000004232	2010	NO	VIH		YES	NO	NO	2010	Woman	F	40	33	NonAIDS	4.03	4.17	304	285	2	42		INNTI	2N+1NN	15	0	943	928	15		2366															596
50023693264	2012	NO	VIH		NO	NO	NO	2012	MWM	H	25	20	AIDS	4.69	5.39	528	97	7	219	Other	INSTI	2N+1II	0	957	1176	219	957	914	2060	150	2.33	NO								530	1.6	YES		679	1.6	YES
50024066747	2011	NO	VIH		YES	YES	NO	2011	Woman	F	66	66	AIDS					1	16	Other	IPb	2N+1IPb	0	27			27	0	43
50054252267	2011	YES	VIH		NO	NO	NO	2011	MWW	H	34	28	NonAIDS	5.01	4.52	432	444	63	1927	Other	INNTI	2N+1NN	7	429	609	173	436		2167				363	1.6	YES	472	1.6		YES
50060177029	2012	YES	VIH&HEP	VHC	YES	YES	NO	2012	MWW	H	39	34	NonAIDS	4.67	4.8	158	299	37	1117	Simplification	IPb	2N+1IPb	0	62	986	924	62		2087											368	3.06	NO		387	4.86	NO
50073040188	2011	NO	VIH		YES	YES	NO	2011	MWW	H	53	52	AIDS					2	53	Simplification	IPb	2N+1IPb	48	0			48	0	375				201	2.35	NO								NO				1.79
50082637966	2011	YES	VIH		NO	NO	NO	2011	MWM	H	61	55	NonAIDS	3.39	4	467	305	54	1645		INNTI	2N+1NN	0	747	882	135	747		2162									NO					NO				4.09	3.8
50088710964	2011	YES	VIH		YES	NO	NO	2011	Woman	F	60	54	NonAIDS	4.69	4.69	328	328	17	510	Simplification	INNTI	2N+1NN	14	0	525	511	14		2317
50091121853	2011	YES	VIH		YES	YES	NO	2011	Woman	F	39	33	NonAIDS	4.2	4.64	107	120	21	640	Simplification	IPb	2N+1IPb	3	78	211	130	81		2261	183	1.78	NO
50100826443	2011	YES	VIH		YES	NO	NO	2011	MWM	H	37	31	NonAIDS	4.07	4.07	304	313	76	2288		INNTI	2N+1NN	8	63	260	189	71		2348				466	1.91	NO			NO		447	1.6	YES						1.91
50105720163	2012	YES	VIH		ND	ND	NO	2011	Woman	F	29	23	NonAIDS		4.43		259	40	1211		INNTI	2N+1NN	158	931	1404	315	1089		1841
50112850368	2012	YES	VIH&HEP	VHB	YES	NO	NO	2012	MWW	H	35	30	AIDS	4.77	4.77	201	201	6	189	Simplification	IPb	2N+1IPb	0	19	131	112	19		1887	139	1.79	NO				263	1.6		YES	251	1.6	YES
50114918173	2012	NO	VIH		NO	NO	NO	2011	MWW	H	36	30	NonAIDS		4.58	836	743	3	98	Simplification	INNTI	2N+1NN	242	176	926	508	418		2122														NO				4.58
50115062893	2012	NO	VIH		NO	NO	NO	2012	MWW	H	55	50	NonAIDS	3.6	3.6	374	374	49	1496	Failure	INNTI	2N+1NN	3	12	924	909	15		1802															523	1.92	NO
50130254269	2011	NO	VIH&HEP	VHC	ND	ND	NO	2011	MWW	H	37	31	AIDS		5.18		720	1	8	Other	IPb	2N+1IPb	92	581	1141	468	673	105	2299							670	1.6		YES	815	1.8	NO	NO				5.18
50149410427	2010	YES	VIH&HEP	VHC	ND	ND	NO	2010	MWM	H	43	36	NonAIDS		1.6		399	31	953	SIDEFF	INNTI	2N+1NN	106	650	633	-123	756		2572
50160778225	2010	YES	VIH		YES	NO	NO	2010	MWW	H	63	57	NonAIDS	6.6	3.6	328	710.2	14	404	Simplification	INSTI	2N+1II	8	1470	1546	68	1478		2367		1.3	YES												407	1.3	YES
50172215760	2012	YES	VIH&HEP	VHB	YES	NO	NO	2012	MWW	H	43	42	NonAIDS	5.47	5.47	212.5	212.5	14	413	SIDEFF	INNTI	2N+1NN	1	13			14		426
50176128567	2013	YES	VIH		YES	YES	NO	2013	Woman	F	43	39	NonAIDS	5.35	5.35	103.2	103.2	12	349	Other	IPb	2N+1IPb	6	8	453	439	14		1542		2.96	NO													1.3	YES
50219188869	2012	YES	VIH		NO	NO	YES	2012	MWM	H	53	48	NonAIDS		4.48	755	819	4	119	Simplification	IPb	2N+1IPb	97	393	721	231	490		1777	877	3.81	NO
50235038221	2011	YES	VIH		YES	NO	NO	2011	MWW	H	23	17	NonAIDS	5.1	4.83	278	337	23	693	Simplification	IPb	2N+1IPb	0	63	301	238	63		2441				401	2.19	NO									424	1.6	YES
50237906873	2010	YES	VIH		NO	NO	NO	2011	Woman	F	29	23	NonAIDS	4.63	4.99	490	490	23	698	Other	IPb	2N+1IPb	7	7	700	686	14		2387	567	3.4	NO	533	2.67	NO	664	1.68		NO				YES				1.6
50241146267	2012	YES	VIH		ND	ND	NO	2011	MWM	H	30	24	NonAIDS		3.68		286	6	187	Simplification	IPb	2N+1IPb	489	291	876	96	780		1652				501	1.6	YES									698	1.6	YES
50244899929	2012	YES	VIH		NO	NO	NO	2012	MWM	H	35	30	NonAIDS	4.99	5.1	721	372	20	608	Simplification	IPb	2N+1IPb	54	241	924	629	295		1785							458	4.53		NO	562	1.6	YES		727	1.6	YES
50252849758	2012	YES	VIH		YES	YES	NO	2012	MWM	H	32	27	NonAIDS		5.66	137	137	16	483	Simplification	INSTI	2N+1II	225	27	469	217	252		1665
50253423035	2012	YES	VIH		NO	NO	NO	2012	Woman	F	42	37	NonAIDS	4.04	4.4	416	376.4	47	1426		IPb	2N+1IPb	6	681	787	100	687		1963														NO		1.3	YES	4.82
50256213963	2011	YES	VIH		YES	YES	NO	2011	MWW	H	34	32	NonAIDS	5.74	5.74	199	199	7	229	Failure	INNTI	2N+1NN	5	21			26		672									NO										4.83
50260810495	2013	YES	VIH		NO	NO	NO	2013	MWM	H	49	45	NonAIDS	5.57	5.39	509	193	43	1306	Simplification	IPb	2N+1IPb	0	126	273	147	126		1587									NO					YES				1.6	2.73
50262873233	2011	YES	VIH		ND	ND	NO	2011	MWM	H	52	48	NonAIDS		3.43		505	6	196	SIDEFF	IPb	2N+1IPb	110	385	691	196	495		1589									NO		722	1.6	YES	NO				3.46	3.45
50269153416	2011	NO	VIH&HEP	VHB	YES	YES	NO	2011	MWW	H	28	22	AIDS	5.54	5.54	100	100	0	1	Other	IPb	2N+1IPb	13	27			40	1779	2253									NO										1.65
50277706385	2011	NO	VIH&HEP	VHB	YES	NO	NO	2011	MWW	H	35	35	NonAIDS	3.31	1.6	236	210	1	28	Other	INNTI	2N+1NN	7	20	7	-20	27		48
50290386379	2012	YES	VIH		YES	YES	NO	2012	MWW	H	47	42	NonAIDS	5.23	5.23	21.9	24	2	56	SIDEFF	IPb	2N+1IPb	10	5	253	238	15		1992	63	3.1	NO	75	2.3	NO	139	1.91	NO	NO									1.91
50307720363	2012	YES	VIH		YES	YES	NO	2012	MWM	H	51	46	NonAIDS	5.61	5.61	95.1	59	64	1938		IPb	2N+1IPb	0	7	294	287	7		1911	93	2.76	NO								116	1.6	YES
50319957972	2012	YES	VIH		NO	NO	NO	2012	Woman	F	18	14	NonAIDS	3.77	3.77	709.1	709.1	67	2013		INNTI	2N+1NN	13	0	216	203	13		1292
50344707668	2011	YES	VIH&HEP	VHC	NO	NO	NO	2011	MWM	H	40	34	NonAIDS	5.8	5.24	505	545	43	1312	SIDEFF	INNTI	2N+1NN	4	511	882	367	515		2176	632	2.57	NO	991	2.27	NO			NO		1054	1.6	YES		751	1.6	YES		5.18
50346899688	2011	YES	VIH		YES	YES	NO	2011	Woman	F	58	53	AIDS	1.6	1.6	38	38	5	147	SIDEFF	INNTI	2N+1NN	14	0	0	-14	14	280	1974				40	1.6	YES					36	1.6	YES	YES	180	1.6	YES	1.6
50365120053	2012	NO	VIH		NO	NO	NO	2012	Woman	F	30	25	NonAIDS	2.02	2.38	544.7	351	4	110	Other	Other	2N	2	91	135	42	93		2161									YES						426	2.09	NO		1.6
50372871041	2013	YES	VIH		YES	NO	NO	2013	Woman	F	43	39	NonAIDS	4.34	4.34	292	292	46	1393	SIDEFF	INNTI	2N+1NN	7	0	91	84	7		1617				343	1.6	YES
50374981403	2011	YES	VIH		YES	YES	NO	2011	MWM	H	62	56	AIDS	5.94	5.94	117	117	15	434	SIDEFF	INNTI	2N+1NN	2	19	245	224	21	1	2049									YES										1.6
50376258493	2011	YES	VIH		NO	NO	NO	2011	Woman	F	37	31	NonAIDS	4.75	3.08	400	517	0	3	Other	IPb	2N+1IPb	0	118	434	316	118		2492	386	1.6	YES						YES										1.6
50381306946	2012	YES	VIH		YES	YES	NO	2012	MWM	H	70	65	NonAIDS	5.99	5.98	162	165	37	1104	Simplification	IPb	2N+1IPb	0	28	460	432	28		1986	181	3.56	NO												296	1.6	YES
50387355983	2012	YES	VIH		YES	YES	NO	2012	Woman	F	38	33	NonAIDS	6.58	6.58	18	18	2	64	SIDEFF	IPb	2N+1IPb	10	0	1122	1112	10		1901	125	3.63	NO	160	2.92	NO	168	4.22	NO	NO					227	1.73	NO		4.22
50390904725	2010	YES	VIH		YES	NO	NO	2010	MWW	H	40	33	NonAIDS	5.83	5.83	213	213	56	1694	Other	IPb	2N+1IPb	14	0	490	476	14		2485
50395436585	2011	YES	VIH		NO	NO	NO	2011	Woman	F	57	51	NonAIDS	3.05	3.42	650	1032	12	341		INNTI	2N+1NN	0	1860	1897	37	1860		2128
50398876369	2012	YES	VIH		NO	NO	NO	2012	MWW	H	49	44	NonAIDS	4.32	4.41	419.3	278	60	1826		INNTI	2N+1NN	5	180	418	233	185		1810									NO							1.6	YES		4.41
50403145790	2010	YES	VIH		YES	YES	NO	2010	MWW	H	50	43	AIDS	5.71	5.71	98	98	2	63	SIDEFF	IPb	2N+1IPb	23	68	609	518	91	4	2539									NO										2.17
50422954738	2011	NO	VIH		NO	NO	NO	2011	MWM	H	29	23	NonAIDS	4.12	3.68	543	457	42	1266		INNTI	2N+1NN	0	937	1199	262	937		1848
50437871277	2011	YES	VIH		NO	NO	NO	2011	Woman	F	35	29	NonAIDS	1.6		429		3	98	Other	IPb	2N+1IPb	0	0	28	28	0		2381				446	4.23	NO								YES	507	1.71	NO	1.6
50447521389	2011	NO	VIH		ND	ND	NO	2011	MWW	H	32	31	NonAIDS		1.6		292	69	2099		Other	1NN+1IPb+1II	237	97	236	-98	334		160
50455990017	2012	YES	VIH		NO	NO	NO	2012	MWW	H	37	32	AIDS	5.47	5.47	377.2	274	5	162	SIDEFF	IPb	2N+1IPb	15	0	268	253	15	144	1861				238	2.47	NO			YES							1.3	YES		1.6
50459906995	2013	YES	VIH		NO	NO	NO	2013	MWM	H	44	40	NonAIDS	4.69	4.7	449	579	53	1587		INNTI	2N+1NN	0	84	259	175	84		1533	569	2.47	NO						YES			1.6	YES		643	1.6	YES		1.6
50466663897	2011	YES	VIH		NO	NO	NO	2011	MWM	H	48	42	NonAIDS	3.9	4.95	562	310	9	277	Simplification	IPb	2N+1IPb	26	584	747	137	610		2451									NO										4.57
50479401350	2012	YES	VIH		YES	NO	NO	2012	Woman	F	53	48	NonAIDS	4.1	4.12	276.5	405	63	1917		INNTI	2N+1NN	9	197	304	98	206		1911
50481528699	2010	YES	VIH		YES	YES	NO	2010	MWM	H	59	52	AIDS	5.84	5.84	43	43	5	161	SIDEFF	IPb	2N+1IPb	0	8	1002	994	8	0	2556				243	3.41	NO			NO						357	2.33	NO		2.84
50484931529	2011	YES	VIH		NO	NO	YES	2011	MWM	H	54	48	NonAIDS	4.42	5.43	644	401	7	239	Simplification	IPb	2N+1IPb	1	857	1343	485	858		2201														NO				5.09
50490531385	2013	YES	VIH		YES	YES	NO	2013	Woman	F	24	20	NonAIDS	5.1	5.1	180	180	8	257	Other	IPb	2N+1IPb	59	23	206	124	82		1629		2.81	NO	162	1.73	NO			NO										1.73
50512676418	2013	YES	VIH		NO	NO	YES	2013	MWM	H	42	38	NonAIDS	5.53	5.53	461.8	461.8	9	274	Other	IPb	2N+1IPb	22	13	525	490	35		1497					2.2	NO		1.9		NO
50513073146	2011	YES	VIH		YES	YES	NO	2011	Woman	F	39	33	NonAIDS	4.2	4.2	182	182	25	770	Other	INNTI	2N+1NN	25	24	196	147	49		2173
50537681699	2012	YES	VIH		YES	YES	NO	2012	MWW	H	64	59	AIDS	5.26	5.47	8	8	2	73	SIDEFF	IPb	2N+1IPb	7	16	190	167	23	0	1773	43	2.41	NO	36	1.6	YES	32	1.6	YES	YES	97	1.6	YES	YES				1.6	1.6
50541195095	2010	YES	VIH		YES	NO	NO	2010	MWM	H	55	48	NonAIDS	5.53	5.2	302	304	23	702	Simplification	IPb	2N+1IPb	0	79	1002	923	79		2519	412	3.73	NO	451	2.9	NO	505	2.13	NO	NO	630	2.27	NO		542	2.21	NO		2.34
50562287092	2011	NO	VIH		YES	YES	NO	2011	MWM	H	37	37	NonAIDS	5.07	5.07	173		1	35	SIDEFF	IPb	2N+1IPb	4	0			4		35
50580928981	2012	NO	VIH		YES	NO	NO	2012	MWW	H	42	40	NonAIDS	5.16	5.16	239	239	11	324	Simplification	IPb	2N+1IPb	45	356	726	325	401		697
50587874353	2013	YES	VIH		NO	NO	NO	2013	Woman	F	31	27	NonAIDS	3.52	4.1	945	1423	53	1599		IPb	2N+1IPb	28	186	600	386	214		1450	1230	4.3	NO											NO				3.8
50597356677	2011	YES	VIH		NO	NO	YES	2011	MWM	H	47	41	NonAIDS		3.89		877	61	1852		INNTI	2N+1NN	209	429	700	62	638		2170				690	1.6	YES		1.3		YES
50610097229	2012	YES	VIH		NO	NO	YES	2012	MWM	H	55	50	NonAIDS	5.15	4.55	402	576	30	927	Other	INNTI	2N+1NN	0	70	196	126	70		1828	582	1.86	NO
50618847072	2012	YES	VIH		NO	NO	NO	2012	MWW	H	34	29	NonAIDS	4.13	4.38	514	462	64	1948	SIDEFF	INNTI	2N+1NN	10	116	252	126	126		1858	506	1.85	NO
50635838806	2012	NO	VIH		YES	YES	NO	2012	Woman	F	42	41	NonAIDS	5.27	5.27	107	107	10	318	Simplification	IPb	2N+1IPb	47	4			51		322				292	2.56	NO								YES				1.6
50638458967	2011	YES	VIH		NO	NO	YES	2011	MWW	H	43	37	NonAIDS	5.76	4.59	706	477	51	1564	SIDEFF	INNTI	2N+1NN	45	449	739	245	494		2319	486	2.18	NO						NO					NO	809	1.6	YES	4.23	4.62
50640438259	2011	YES	VIH		NO	NO	NO	2011	MWM	H	44	38	NonAIDS	5.53	5.53	755	523	9	259	SIDEFF	IPb	2N+1IPb	20	85	854	749	105		2242	466	2.78	NO	369	1.6	YES	606	1.6	YES	YES				YES				1.6	1.6
50643690467	2013	NO	VIH		YES	YES	NO	2013	MWW	H	48	47	NonAIDS	5.17	5.17	130	130	2	64	SIDEFF	IPb	2N+1IPb	36	0	171	135	36		331	256	2.93	NO	254	1.8	NO			YES					YES				1.6	1.6
50647350490	2012	YES	VIH		YES	YES	NO	2012	MWW	H	51	46	NonAIDS	2.26	5.22	36	10	51	1548	Simplification	IPb	2N+1IPb	8	97	294	189	105		1891	73	2.72	NO		2.24	NO	126	1.3	NO	YES						1.8	NO		2.24
50657013953	2010	YES	VIH		NO	NO	NO	2010	MWM	H	50	43	NonAIDS	4.42	3.48	629	422	25	769	Other	INSTI	2N+1II	0	1841	1938	97	1841		2610				404	1.6	YES
50661445260	2012	YES	VIH		YES	YES	NO	2012	MWW	H	77	72	NonAIDS	5.9	5.9	36	75	4	116	SIDEFF	IPb	2N+1IPb	6	30	378	342	36		1879														YES				1.6
50663753688	2012	YES	VIH		YES	NO	NO	2012	Woman	F	42	37	NonAIDS	2.46	2.46	327	327	24	731	Simplification	IPb	2N+1IPb	0	202	255	53	202		1703
50683162868	2011	YES	VIH		NO	NO	NO	2011	MWM	H	29	23	NonAIDS	3.83	3.87	371	332	12	366	SIDEFF	IPb	2N+1IPb	7	351	518	160	358		2201	523	2.01	NO													1.3	YES
50693767726	2013	YES	VIH		NO	NO	YES	2013	MWM	H	50	46	NonAIDS	6.2	5.57	536	502	13	392	Simplification	IPb	2N+1IPb	9	110	511	392	119		1328									NO					YES				1.6	2.99
50698872864	2010	NO	VIH		ND	ND	NO	2010	MWW	H	40	40	NonAIDS					87	2636		INNTI	2N+1NN	121	0			121		0
50713436305	2013	YES	VIH		YES	YES	NO	2013	Woman	F	54	50	AIDS	5.66	3.09	20	20	17	525	Simplification	IPb	2N+1IPb	4	25	106	77	29	0	1537							72	1.8	YES	NO				YES	234	1.6	YES	1.6	1.6
50718166530	2011	YES	VIH&HEP	VHC	NO	NO	NO	2011	MWM	H	45	40	NonAIDS	5.14	5.14	643	643	13	400	SIDEFF	IPb	2N+1IPb	0	23	337	314	23		2038	748	2.86	NO	689	1.84	NO					696	1.6	YES		637	1.6	YES
50730750680	2012	NO	VIH		YES	YES	NO	2012	Woman	F	49	48	AIDS	4.51	4.51	100	90	71	2154		IPb	2N+1IPb	0	14			14	0	583	128	2.15	NO												127	5	NO
50736407041	2011	YES	VIH		YES	YES	NO	2011	Woman	F	28	22	NonAIDS	1.72		174	174	1	35	Other	Other	2N+1IPb+1II	0	0	89	89	0		2266	274	1.6	YES				315	1.6	YES	YES									1.6
50749553859	2011	YES	VIH&HEP	VHB	YES	NO	NO	2011	Woman	F	39	33	NonAIDS	4.78	4.77	230	245	15	467	Intensification	IPb	2N+1IPb	35	154	294	105	189		2224															419	1.6	YES
50752895534	2011	YES	VIH		YES	NO	NO	2011	MWW	H	49	43	AIDS	5.24	5.51	328	317	7	206	SIDEFF	IPb	2N+1IPb	13	85	581	483	98	304	2346											306	1.6	YES	YES	441	3.91	NO	1.6
50753309607	2011	YES	VIH&HEP	VHC	NO	NO	YES	2011	MWM	H	41	35	NonAIDS	5.13	4.21	650	477	8	242	Other	IPb	2N+1IPb	7	2	1093	1084	9		2220	748	2.91	NO	794	2.52	NO	679	1.6		YES				NO				3.98
50756079554	2012	YES	VIH		YES	YES	NO	2012	MWM	H	22	20	NonAIDS	5.45	5.45	61	61	68	2062		IPb	2N+1IPb	0	48	294	246	48		805				102	1.6	YES			YES					YES	124	2.86	NO	1.6	1.6
50756099879	2012	NO	VIH		NO	NO	NO	2012	MWW	H	69	64	AIDS	4.38	5.04	600	104	0	10	SIDEFF	IPb	2N+1IPb	0	1992	2030	38	1992	1963	2166							424	1.54		YES
50767415344	2012	YES	VIH		NO	NO	NO	2012	MWM	H	53	48	NonAIDS	4.54	4.29	549	659	31	916		INNTI	2N+1NN	121	887	1070	62	1008		1785		2.4	NO	660	1.6	YES	657	1.6		YES
50775661647	2012	YES	VIH		NO	NO	NO	2012	MWM	H	38	33	NonAIDS	3.81	4.2	674	397	46	1393		INNTI	2N+1NN	0	755	951	196	755		2134												1.6	YES	NO		1.6	YES	4.13
50777563274	2010	YES	VIH		NO	NO	NO	2010	MWM	H	53	46	NonAIDS	4.97	5.22	383	427	29	882	Simplification	IPb	2N+1IPb	0	203	546	343	203		2331	460	2.68	NO						NO						680	1.6	YES		4.99
50793056667	2012	YES	VIH		YES	YES	NO	2012	Woman	F	21	16	NonAIDS	4.2	4.2	89	89	11	335	Simplification	IPb	2N+1IPb	38	27	191	126	65		1877	140	2.44	NO					1.6	YES	YES		1.6	YES	YES		1.6	YES	1.6	1.6
50798259914	2012	YES	VIH		NO	NO	NO	2012	Woman	F	63	58	NonAIDS	2.46	3.21	555.5	495	57	1707		INNTI	2N+1NN	24	406	458	28	430		1932
50808391750	2012	YES	VIH		NO	NO	YES	2011	Woman	F	26	20	NonAIDS	4.21	4.08	800.8	490	12	380	Other	INNTI	2N+1NN	29	251	315	35	280		2064
50808564245	2011	YES	VIH&HEP	VHB	ND	ND	NO	2010	Woman	F	37	30	NonAIDS		4.69		296	15	467	Simplification	IPb	2N+1IPb	519	30	673	124	549		2212															605	1.6	YES
50808773219	2012	YES	VIH		YES	YES	NO	2012	Woman	F	37	32	AIDS	4.32	4.11	342	433	23	699	Other	IPb	2N+1IPb	7	112	7	-112	119	26	1996	570	2.44	NO	618	1.73	NO			YES					YES				1.3	1.6
50812694788	2010	YES	VIH		YES	YES	NO	2010	Woman	F	48	41	AIDS	4.92	5.1	145	114	75	2301	Failure	INNTI	2N+1NN	22	29	2380	2329	51	0	2437	249	2.98	NO						YES						340	1.6	YES		1.6
50817128479	2012	YES	VIH		YES	YES	NO	2012	MWM	H	63	58	AIDS	5.27	1.6	92	117	25	755	Simplification	IPb	2N+1IPb	61	115	36	-140	176	0	1797	213	1.76	NO
50851970851	2012	YES	VIH		NO	NO	NO	2010	MWM	H	38	31	NonAIDS		4.43	538	400	60	1819		INNTI	2N+1NN	589	368	1063	106	957		2061	497	2.67	NO
50852123439	2011	YES	VIH		NO	NO	NO	2011	MWW	H	71	65	NonAIDS	3.41		413		13	398	Simplification	IPb	2N+1IPb	47	3	306	256	50		2179	413	3.41	NO	529	2.52	NO	610	1.6	NO	YES						1.3	YES		2.13
50864483058	2012	YES	VIH		NO	NO	YES	2012	MWM	H	59	54	NonAIDS	5.85	5.85	344	344	8	243	SIDEFF	IPb	2N+1IPb	8	7	195	180	15		1882	369	2.63	NO						YES		395	1.6	YES						1.6
50865636170	2011	YES	VIH		NO	NO	NO	2011	Woman	F	52	46	NonAIDS	5.56	4.59	520	360	69	2082		INNTI	2N+1NN	77	164	371	130	241		2200	288	2.4	NO				381	1.6	NO	YES				YES				1.6	4.05
50872677028	2012	YES	VIH		YES	YES	NO	2012	MWW	H	55	50	AIDS	5.54	5.54	122		14	420	Simplification	IPb	2N+1IPb	7	12	229	210	19	0	1721	122	3.67	NO				224	1.9		NO				YES				1.6
50894980847	2011	YES	VIH		NO	NO	NO	2011	Woman	F	42	36	NonAIDS	1.6	2.26	353	354	26	779	Simplification	IPb	2N+1IPb	0	49	0	-49	49		2401							248	1.79		NO	278	1.6	YES		325	1.6	YES
50895164132	2013	YES	VIH		NO	NO	NO	2013	Woman	F	26	22	NonAIDS	4.08	3.82	462	507	6	175	Other	INNTI	2N+1NN	0	140	910	770	140		1701							568	3.37		NO
50922262072	2010	YES	VIH		YES	YES	NO	2010	MWW	H	50	43	NonAIDS	5.52	5.52	9	9	20	624	Other	IPb	2N+1IPb	21	8	154	125	29		2569	28	2.6	NO	31	1.45	YES									66	1.6	YES
50946514308	2011	YES	VIH		NO	NO	NO	2011	MWM	H	53	47	NonAIDS	2.41	2.88	646	839	44	1336		INNTI	2N+1NN	0	1034	1097	63	1034		2259														NO				3.12
50949075639	2010	YES	VIH		YES	NO	NO	2010	MWW	H	47	40	AIDS	4.08	3.54	583	612.5	44	1328	SIDEFF	INNTI	2N+1NN	0	948	1204	256	948	31	2557														NO				2.52
50949550807	2011	YES	VIH		NO	NO	NO	2011	MWW	H	47	46	NonAIDS	3	3.27	431	527	16	483	Other	Other	1IPb+1II	9	26	49	14	35		509	572	1.6	YES								531	1.6	YES
50956249415	2013	YES	VIH		NO	NO	NO	2013	Woman	F	56	52	NonAIDS	4.11	4.11	628	628	56	1692		INNTI	2N+1NN	0	23	191	168	23		1661							964	1.6	YES	YES									1.6
50993663966	2012	YES	VIH		NO	NO	YES	2012	MWM	H	58	53	NonAIDS	5.6	4.46	640	483	60	1811		INNTI	2N+1NN	0	329	420	91	329		2100				619	1.6	YES								YES				1.6
50996619641	2011	YES	VIH		NO	NO	NO	2011	Woman	F	39	33	NonAIDS	1.86	1.86	781	781	8	237	Other	IPb	2N+1IPb	0	36	56	20	36		2485				1151	1.6	YES			YES					YES	998	1.6	YES	1.6	1.6
50998436119	2013	YES	VIH		NO	NO	YES	2013	MWM	H	37	34	NonAIDS	6.26	5.55	284	471	31	941	Other	IPb	2N+1IPb	8	0	239	231	8		1183	681	3.18	NO
50998436121	2013	YES	VIH&HEP	VHB	NO	NO	NO	2013	Woman	F	30	26	NonAIDS	4.9	4.9	474.3	474.3	54	1629		INNTI	2N+1NN	0	0	224	224	0		1510					1.6	YES									819	1.6	YES
50998436141	2013	YES	VIH		YES	YES	NO	2013	MWW	H	41	37	NonAIDS	4.5	4.5	23	23	53	1609		INNTI	2N+1NN	20	12	95	63	32		1580									YES		253	1.64	NO						1.6
50998436154	2013	YES	VIH		NO	NO	YES	2013	Woman	F	43	39	NonAIDS	7.4	7	350	350	34	1047	SIDEFF	IPb	2N+1IPb	3	0	240	237	3		1516	619	3.2	NO				984	1.66	NO	NO				YES	840	1.6	YES	1.6	1.66
50998436165	2013	YES	VIH		YES	YES	NO	2013	Woman	F	30	27	NonAIDS	5.38	5.38	97	97	0	28	SIDEFF	INNTI	2N+1NN	0	12	756	744	12		1225															326	1.6	YES
50998436178	2013	YES	VIH		YES	YES	NO	2013	Woman	F	71	67	NonAIDS	3.75	3.75	113	113	3	83	SIDEFF	IPb	2N+1IPb	14	21	531	496	35		1584									YES		164	1.6	YES						1.6
50998436197	2013	YES	VIH		YES	YES	NO	2013	Woman	F	34	30	NonAIDS	4.3	4.2	170	170	9	268	SIDEFF	INNTI	2N+1NN	13	14	90	63	27		1624	201	1.9	NO								417	1.6	YES
50998436217	2013	YES	VIH&HEP	VHC	YES	NO	NO	2013	MWW	H	31	30	NonAIDS	2.7	2.7	236	236	1	9	SIDEFF	INNTI	2N+1NN	5	45	161	111	50		387							291	1.99		NO
50998436218	2013	NO	VIH		NO	NO	NO	2013	MWM	H	21	20	NonAIDS	4.4	4.4	770	770	52	1566		IPb	2N+1IPb	0	40	222	182	40		313							687	1.6		YES
50998436219	2013	YES	VIH		NO	NO	YES	2013	MWM	H	26	22	NonAIDS	6	6	428	428	2	90	Simplification	Other	2N+1IPb+1II	0	3	93	90	3		1465				582	1.6	YES	639	1.6	YES	YES					466	1.6	YES		1.6
50998436258	2013	YES	VIH		NO	NO	NO	2013	MWM	H	54	50	NonAIDS	3.35	3.46	586	725	53	1610	Other	INNTI	2N+1NN	27	84	216	105	111		1358															922	1.6	YES
50998436259	2013	YES	VIH		ND	ND	NO	2012	Woman	F	35	30	NonAIDS		5.44		220	1	31	Other	IPb	2N+1IPb	634	194	1317	489	828		1399											310	5.12	NO		432	1.6	YES
50998436267	2013	YES	VIH		YES	NO	NO	2013	MWM	H	64	60	AIDS	5.35	5.35	413	413	14	434	Simplification	IPb	2N+1IPb	14	21	733	698	35	0	1398				530	2.57	NO									674	1.85	NO
50998436274	2013	NO	VIH		NO	NO	NO	2013	MWM	H	47	43	NonAIDS	5.1	6.16	388.6	336	16	487	Other	INSTI	2N+1II	21	808	888	59	829		1420
50998436340	2013	NO	VIH&HEP	VHC	NO	NO	NO	2013	MWM	H	21	20	NonAIDS	4.4	4.6	700	613	50	1501		IPb	2N+1IPb	0	8	95	87	8		203				825	1.6	YES			YES										1.6
50998436345	2013	YES	VIH		YES	YES	NO	2013	MWM	H	59	55	NonAIDS	4.4	4.41	72	72	16	469	Simplification	IPb	2N+1IPb	24	0	368	344	24		1505	79	2.9	NO	113	2	NO								YES	179	1.79	NO	1.6
50998436367	2013	YES	VIH		YES	YES	NO	2013	MWW	H	32	28	NonAIDS	6.2	6.2	104	104	11	320	Simplification	IPb	2N+1IPb	0	23	224	201	23		1429															282	1.6	YES
50998436368	2013	YES	VIH&HEP	VHC	YES	YES	NO	2013	MWW	H	59	55	AIDS	5.6	5.6	51	62	1	21	SIDEFF	INNTI	2N+1NN	8	19	227	200	27	0	1430	105	2.5	NO	135	1.6	YES									272	1.6	YES
50998436370	2013	YES	VIH		YES	YES	NO	2013	MWW	H	32	28	NonAIDS	5.1	5.15	120	120	49	1505	Other	INNTI	2N+1NN	26	0	509	483	26		1405
50998436371	2013	YES	VIH		YES	YES	NO	2013	MWM	H	35	31	AIDS	5.8	5.8	251	251	16	491	Simplification	IPb	2N+1IPb	42	21	349	286	63	0	1212															564	1.6	YES
50998436387	2013	NO	VIH		YES	YES	NO	2013	MWW	H	55	55	AIDS	6.9	6.9	8	8	0	11	SIDEFF	Other	2N+1IPb+1II	0	5			5	0	142
50998436391	2013	NO	VIH		NO	NO	NO	2013	MWM	H	22	20	NonAIDS	3.6	3.66	518	445	47	1419		INNTI	2N+1NN	0	72	121	49	72		632
50998436392	2013	YES	VIH		NO	NO	NO	2013	MWM	H	33	29	NonAIDS	4.1	5.6	525	525	3	85	Simplification	Other	2N+1IPb+1II	4	0	81	77	4		1393	688	2.5	NO												962	1.6	YES
50998436411	2013	YES	VIH		NO	NO	NO	2013	Woman	F	23	19	NonAIDS	3.7	3.52	876	876	0	0	Other	INNTI	2N+1NN	43	0	178	135	43		1289									YES					YES				1.6	1.6
50998436413	2013	YES	VIH		NO	NO	NO	2013	Woman	F	24	20	NonAIDS	3.5	3.76	511	424	39	1183		INNTI	2N+1NN	38	257	430	135	295		1346	850	1.6	YES						NO						860	1.54	YES		3.4
50998436414	2013	YES	VIH		YES	NO	NO	2013	Woman	F	44	40	NonAIDS	5	5	209	209	17	497	SIDEFF	INNTI	2N+1NN	0	63	217	154	63		1381
50998436454	2014	NO	VIH		YES	NO	NO	2014	Woman	F	27	24	NonAIDS	4.26	4.26	340	340	6	201	Simplification	IPb	2N+1IPb	0	16	121	105	16		1435														YES	765	1.6	YES	1.6
50998436472	2014	YES	VIH&HEP	VHB	YES	NO	NO	2014	Woman	F	38	35	NonAIDS	4.4	4.4	243	243	47	1407		INNTI	2N+1NN	0	28	350	322	28		1246	236	2.43	NO	254	1.6	YES	238	1.6		YES				YES				1.6
50998436479	2014	YES	VIH		YES	YES	NO	2014	Woman	F	57	54	NonAIDS	2.9	2.9	82	82	11	320	Simplification	IPb	2N+1IPb	3	5	56	48	8		1333
50998436492	2014	YES	VIH		YES	YES	NO	2014	MWM	H	49	46	NonAIDS	5.8	5.8	46	46	12	370	Simplification	IPb	2N+1IPb	0	7	377	370	7		1336							282	1.89	NO	NO	356	1.6	YES	YES				1.6	1.89
50998436504	2014	YES	VIH		ND	ND	NO	2013	Woman	F	36	32	NonAIDS		4.8		415	44	1336		INNTI	2N+1NN	191	123	656	342	314		1439	464	2.7	NO
50998436524	2014	YES	VIH		YES	YES	NO	2014	Woman	F	68	65	AIDS	6	6	20	20	2	57	SIDEFF	IPb	2N+1IPb	0	5	127	122	5	0	1329
50998436529	2013	YES	VIH		YES	YES	NO	2013	MWM	H	52	48	AIDS	6.5	5.3	34.8	244.4	4	119	Intensification	IPb	2N+1IPb	0	38	1084	1046	38	109	1410							281	2.3		NO	238	3.8	NO	NO				5.4
50998436530	2014	YES	VIH		NO	NO	NO	2014	Woman	F	39	36	NonAIDS	2.1	2.1	381	381	10	284	Simplification	IPb	2N+1IPb	1	0	33	32	1		1370									YES										1.6
50998436544	2014	YES	VIH&HEP	VHB	YES	YES	NO	2014	MWW	H	70	68	AIDS	5.7	5.43	15	12	3	86	Simplification	IPb	2N+1IPb	0	42	478	436	42	959	1005							128	2		NO
50998436578	2014	YES	VIH		NO	NO	NO	2014	MWM	H	34	31	NonAIDS	4.8	4.83	627	627	7	193	SIDEFF	IPb	2N+1IPb	0	17	210	193	17		1253	730	2.8	NO
50998436612	2014	YES	VIH		NO	NO	NO	2014	MWM	H	60	57	NonAIDS	4.9	4.9	432	432	2	47	Other	Other	1IPb+1II	0	6	178	172	6		1201	661	2.1	NO	726	2.5	NO	871	1.6	YES	YES	768	1.63	NO	NO				1.63	1.6
50998436626	2014	YES	VIH		YES	NO	NO	2014	MWW	H	48	45	AIDS	5.2	5.19	211	211	14	411	SIDEFF	IPb	2N+1IPb	14	55	328	259	69	325	1280	339	3.01	NO	306	2.49	NO					194	2.53	NO		197	1.61	NO
50998436627	2014	YES	VIH		YES	YES	NO	2014	MWM	H	51	48	NonAIDS	5.6	5.6	66	75	10	287	Simplification	IPb	2N+1IPb	0	34	197	163	34		1182											301	1.6	YES		241	1.6	YES
50998436633	2014	YES	VIH		YES	YES	NO	2014	Woman	F	35	32	AIDS	3		51		43	1295		IPb	2N+1IPb	0	38	368	330	38	84	1323	51	3	NO				83	1.66		NO				YES	196	1.6	YES	1.6
50998436676	2014	YES	VIH		YES	NO	NO	2014	MWM	H	40	37	NonAIDS	3.42	4.1	228.5	291	40	1204		INNTI	2N+1NN	6	96	299	197	102		1294									YES										1.6
50998436691	2014	YES	VIH&HEP	VHC	NO	NO	NO	2014	MWM	H	56	53	NonAIDS	4.5	4.79	572.2	391	35	1072	Other	INNTI	2N+1NN	2	305	434	127	307		1233									NO		609	1.6	YES		508	1.54	YES		4.62
50998436708	2014	YES	VIH		YES	NO	NO	2014	MWW	H	44	41	NonAIDS	1.6	5.7	228	228	6	178	Simplification	IPb	2N+1IPb	0	51	387	336	51		1288				764	2.9	NO	558	1.92		NO
50998436712	2014	YES	VIH		ND	ND	NO	2014	Woman	F	44	41	NonAIDS					17	543	SIDEFF	Other	1N+1IPb	163	6	1169	1000	169		1195									NO		254	3.65	NO		353	1.3	YES		2.6
50998436724	2014	NO	VIH		NO	NO	NO	2012	MWW	H	20	16	NonAIDS	5.6	6	666.3	449	15	457	Other	IPb	2N+1IPb	775	365			1140		891
50998436780	2014	YES	VIH		YES	NO	NO	2014	Woman	F	41	38	NonAIDS	5	5	265	265	6	186	Other	IPb	2N+1IPb	0	9	135	126	9		1266								1.3	YES	YES						1.3	YES		1.3
50998436788	2013	YES	VIH		ND	ND	NO	2013	MWM	H	29	25	NonAIDS		2.67		487	3	98	Simplification	IPb	2N+1IPb	134	350	533	49	484		1468							599	1.6		YES					821	1.6	YES
50998436802	2014	YES	VIH		NO	NO	NO	2014	MWM	H	33	32	NonAIDS	5.03	5.03	669	669	40	1203		INSTI	2N+1II	17	28	136	91	45		370				864	1.6	YES
50998436807	2014	YES	VIH		YES	YES	NO	2014	Woman	F	42	39	NonAIDS	5.6	5.63	150	150	4	106	Simplification	IPb	2N+1IPb	6	28	196	162	34		1134									NO										2.25
50998436809	2014	YES	VIH		NO	NO	YES	2014	MWW	H	62	59	NonAIDS	6.17	5.25	759	556	30	925	Other	INSTI	2N+1II	0	22	189	167	22		1099	698	1.92	NO				805	1.6	YES	YES	583	1.6	YES		572	1.6	YES		1.6
50998436815	2014	YES	VIH		NO	NO	NO	2014	MWW	H	37	34	NonAIDS	5.1	5.05	433	433	0	5	Other	INSTI	2N+1II	0	292	756	464	292		1057
50998436828	2011	NO	VIH		NO	NO	YES	2011	MWM	H	28	22	AIDS	6.84	6.84	910	910	7	227	Other	Other	2N+1IPb+1IE	0	8	1296	1288	8	0	2141	1754	4.4	NO
50998436845	2014	YES	VIH		NO	NO	NO	2014	MWM	H	42	39	NonAIDS	2.7	3.01	610	1004.2	28	852		INNTI	2N+1NN	0	351	378	27	351		945									NO					YES				1.6	3.52
50998436846	2014	NO	VIH		YES	YES	NO	2014	MWW	H	28	27	NonAIDS	4.6	4.57	150	150	3	97	Other	IPb	2N+1IPb	0	55			55		279	189	2.6	NO
50998436858	2014	NO	VIH		ND	ND	NO	2011	Woman	F	30	26	NonAIDS		3.19		517	40	1202		INNTI	2N+1NN	1317	0	1436	119	1317		260	483	1.6	YES
50998436870	2014	YES	VIH		YES	YES	NO	2014	MWW	H	59	56	AIDS	4.95	5.07	23	23	35	1050	Simplification	IPb	2N+1IPb	0	15	180	165	15	0	1098	273	2.97	NO	128	1.65	NO	137	1.6	YES	YES				YES				1.6	1.6
50998436894	2014	YES	VIH		YES	YES	NO	2014	MWW	H	49	46	AIDS	4.7	4.7	30.3	30.3	0	12	SIDEFF	IPb	2N+1IPb	13	0	119	106	13	13	1152		2.1	NO					1.3	YES	YES						1.5	YES		1.3
50998436907	2014	YES	VIH		NO	NO	NO	2014	MWM	H	57	54	NonAIDS	3.4	3.93	512	610	8	219	Simplification	INSTI	2N+1II	0	186	222	36	186		1159	580	1.6	YES						NO						1187	1.54	YES		3.93
50998436911	2014	YES	VIH		YES	YES	NO	2014	MWW	H	54	51	AIDS	6.4	3.32	101	48	6	188	SIDEFF	IPb	2N+1IPb	1	24	231	206	25	1	1084							257	1.67		NO				YES				1.6
50998436936	2014	YES	VIH		NO	NO	NO	2014	MWM	H	26	24	NonAIDS	5.79	5.7	415	461	3	103	Simplification	IPb	2N+1IPb	6	49			55		662	769	3.29	NO				1197	2.06		NO
50998436951	2014	YES	VIH		NO	NO	NO	2014	MWW	H	47	44	NonAIDS	4.1	4.1	421	421	14	398	Simplification	IPb	2N+1IPb	2	18	140	120	20		1102	529	1.7	NO								714	1.6	YES
50998436954	2014	NO	VIH&HEP	VHC	NO	NO	NO	2014	MWW	H	25	24	NonAIDS	4.29	3.91	730	730	38	1154		INNTI	2N+1NN	14	7			21		76
50998436955	2014	YES	VIH		NO	NO	NO	2014	MWW	H	34	31	NonAIDS	1.72		665		37	1119		INNTI	2N+1NN	15	42	123	66	57		1086	665	1.72	NO											YES				1.6
50998436966	2014	YES	VIH		NO	NO	NO	2014	Woman	F	39	36	NonAIDS	4.3	4	672.3	610.6	18	562	Other	INSTI	2N+1II	3	626	667	38	629		1007								1.3	NO	YES		1.3	YES		863	1.5	YES		4.4
50998436991	2014	NO	VIH		YES	YES	NO	2014	MWM	H	41	40	NonAIDS	6.3	6.3	104	104	36	1088		IPb	2N+1IPb	0	49			49		147				263	2.11	NO
50998436998	2014	YES	VIH		YES	NO	NO	2014	Woman	F	24	21	NonAIDS	5.5	5.5	307.6	307.6	12	365	Other	INSTI	2N+1II	13	48	217	156	61		1115															464	4.56	NO
50998437001	2014	YES	VIH		ND	ND	NO	2011	MWW	H	30	25	NonAIDS		3.76		410	36	1076		INNTI	2N+1NN	1260	56	1477	161	1316		695	474	1.6	YES
50998437011	2014	NO	VIH		NO	NO	NO	2014	MWW	H	26	23	NonAIDS	3.73	5.49	566	64	19	558		INNTI	2N+1NN	0	568	687	119	568		1051				154	1.54	YES
50998437042	2014	YES	VIH		ND	ND	NO	2014	Woman	F	22	20	NonAIDS	4.72	4.72			35	1064		INNTI	2N+1NN	0	45	385	340	45		735
50998437061	2013	YES	VIH&AES		NO	NO	YES	2014	MWM	H	34	31	NonAIDS	4.66	4.66	518	518	9	257	Simplification	IPb	2N+1IPb	0	16	184	168	16		952	823	2.41	NO	621	1.65	NO	591	1.6	YES	YES					687	1.5	YES		1.6
50998437079	2014	YES	VIH		YES	NO	NO	2014	MWM	H	55	52	NonAIDS	4.09	4.09	340	402	10	301	Simplification	IPb	2N+1IPb	0	74	254	180	74		1066							511	1.6		YES				YES				1.6
50998437080	2014	YES	VIH		NO	NO	YES	2014	MWM	H	27	24	NonAIDS	4.61	4.33	733	587	35	1043		INNTI	2N+1NN	10	88	126	28	98		1103
50998437109	2015	YES	VIH		NO	NO	NO	2015	MWM	H	33	32	NonAIDS	4.24	4.84	395	380	10	307	SIDEFF	INNTI	2N+1NN	0	63	203	140	63		615	455	2.1	NO											YES	597	1.54	YES	1.6
50998437111	2015	YES	VIH		ND	ND	NO	2015	Woman	F	37	35	NonAIDS	2.27				2	48	Simplification	INSTI	2N+1II	7	0	137	130	7		1063
50998437135	2014	YES	VIH		YES	NO	NO	2014	MWM	H	57	54	NonAIDS	4.43	4.32	256	301	1	24	Other	IPb	2N+1IPb	0	111	167	56	111		1000	254	4.44	NO						YES		355	4.24	NO	NO				1.83	1.6
50998437140	2015	YES	VIH		YES	YES	NO	2015	MWW	H	40	38	AIDS	4.7	4.7	226		12	369	Simplification	IPb	2N+1IPb	7	14	391	370	21	0	1036	226	2.57	NO
50998437141	2015	YES	VIH		NO	NO	YES	2015	MWM	H	30	28	NonAIDS	4.2	4.22	303.7	303	35	1054		INNTI	2N+1NN	6	8	97	83	14		735	313	1.85	NO	277	1.6	YES
50998437178	2015	YES	VIH		YES	NO	NO	2015	Woman	F	37	35	NonAIDS	3.91	3.91	350	350	34	1029		IPb	2N+1IPb	0	19	166	147	19		957									YES										1.6
50998437227	2015	YES	VIH		NO	NO	YES	2015	MWM	H	27	25	NonAIDS	4.23	4.23	616	616	26	810	Other	INSTI	2N+1II	0	8	29	21	8		955														YES	671	1.5	YES	1.6
50998437232	2015	YES	VIH		NO	NO	NO	2015	MWM	H	49	47	NonAIDS	5.33	5.33	516	516	11	334	Simplification	INSTI	2N+1II	0	26	178	152	26		1001									YES										1.6
50998437447	2011	NO	VIH		YES	YES	NO	2011	Woman	F	44	38	NonAIDS	5.8	5.8	141	141	56	1694	Simplification	IPb	2N+1IPb	26	0	189	163	26		2388	229	3.3	NO	207	2.1	NO			YES						403	1.3	YES		1.3
50998437590	2015	YES	VIH		YES	NO	NO	2015	MWM	H	33	31	NonAIDS	5.57	5.57	281	281	23	714	Other	INSTI	2N+1II	0	0	91	91	0		714				288	1.6	YES	522	1.6	YES	YES									1.6
50998437608	2015	YES	VIH		YES	YES	NO	2015	MWW	H	58	56	NonAIDS	6	6	47	47	33	993		IPb	2N+1IPb	6	19	195	170	25		845									YES					YES				1.6	1.6
50998437610	2015	YES	VIH		YES	YES	NO	2015	MWM	H	54	52	NonAIDS	4.87	4.87	22	22	33	994		INNTI	2N+1NN	24	14	136	98	38		980	44	2.6	NO	42	1.6	YES
50998437616	2015	NO	VIH		NO	NO	YES	2015	MWW	H	36	36	NonAIDS	5.71	5.71	479	479	33	998		INSTI	2N+1II	0	10			10		28
50998437630	2015	YES	VIH		NO	NO	NO	2015	MWM	H	44	42	NonAIDS	5.1	5.1	495	495	35	1046		INNTI	2N+1NN	3	42	196	151	45		837														YES				1.3
50998437638	2015	YES	VIH		NO	NO	NO	2015	MWW	H	38	36	NonAIDS	6.01	4.97	629	502	32	973		INNTI	2N+1NN	64	31	320	225	95		845	741	2.79	NO						NO										2.01
50998437646	2015	NO	VIH		YES	YES	NO	2015	MWM	H	53	51	NonAIDS	6.1	6.1	65	65	26	790	Other	INSTI	2N+1II	10	14	241	217	24		965														YES				1.6
50998437647	2015	NO	VIH		NO	NO	NO	2015	MWM	H	27	25	NonAIDS	3.76	3.76	479	479	32	970		INNTI	2N+1NN	35	16	111	60	51		962									YES						905	1.54	YES		1.6
50998437667	2015	YES	VIH		YES	NO	NO	2015	MWW	H	67	65	NonAIDS	4.8	4.8	318	318	33	980		INNTI	2N+1NN	12	28	250	210	40		939
50998437691	2015	YES	VIH		YES	YES	NO	2015	MWM	H	36	34	AIDS	5.88	5.88	59	59	5	142	Simplification	IPb	2N+1IPb	5	16	107	86	21	16	976	132	3.1	NO	168	1.6	YES									329	1.54	YES
50998437718	2015	YES	VIH		NO	NO	NO	2015	MWM	H	53	51	NonAIDS	3.85	3.85	372	372	21	655	Other	INSTI	2N+1II	0	24	59	35	24		822
50998437721	2015	YES	VIH&HEP	VHC	YES	YES	NO	2015	MWW	H	48	46	AIDS	5.6	5.6	202	202	8	234	SIDEFF	INSTI	2N+1II	7	55	150	88	62	31	940	241	2.53	NO	187	1.6	YES								YES	477	1.54	YES	1.6
50998437729	2015	NO	VIH		NO	NO	YES	2015	MWM	H	20	19	NonAIDS	5.43	5.43	384	384	4	96	Simplification	INSTI	2N+1II	4	3	39	32	7		257	641	1.6	YES				555	1.6	YES	YES									1.6
50998437732	2015	YES	VIH		YES	NO	NO	2015	Woman	F	32	30	NonAIDS	1.6	1.6	269	269	9	268	Other	INNTI	2N+1NN	0	0	0	0	0		1016				284	1.6	YES
50998437733	2015	YES	VIH		NO	NO	YES	2015	Woman	F	37	35	NonAIDS	4.1	2.52	683	926	2	61	SIDEFF	INNTI	2N+1NN	7	36	109	66	43		850											934	1.54	YES
50998437739	2015	YES	VIH		NO	NO	NO	2015	MWW	H	29	27	NonAIDS	5.4	5.4	459	459	21	629	Other	INSTI	2N+1II	8	34	112	70	42		852											1026	1.69	NO
50998437854	2015	YES	VIH		NO	NO	YES	2015	MWM	H	52	50	NonAIDS	3.89	3.89	898	898	27	805	Other	INSTI	2N+1II	11	0	25	14	11		805									YES										1.6
50998437855	2015	YES	VIH&HEP	VHB	YES	YES	NO	2015	MWM	H	59	57	AIDS	5.54	5.54	70	70	1	36	Other	IPb	2N+1IPb	0	15	70	55	15	0	833				158	1.6	YES	169	1.67		NO	284	1.66	NO	NO				1.66
50998437856	2015	YES	VIH		NO	NO	NO	2015	Woman	F	58	56	NonAIDS	3.61	3.82	1204	1353	11	308		INSTI		0	616	681	65	616		868
50998437868	2015	YES	VIH&HEP	VHB	YES	NO	NO	2015	Woman	F	40	38	NonAIDS	3.5	3.01	321.6	275	30	924	Other	INNTI	2N+1NN	27	70	153	56	97		805															443	1.54	YES
50998437874	2014	NO	VIH		YES	YES	NO	2014	MWW	H	34	33	AIDS	4.4	4.4	232	232	2	50	SIDEFF	INSTI	2N+1II	5	11			16	0	258							693	2.37	NO	NO									2.37
50998437890	2015	YES	VIH&HEP	VHB	NO	NO	NO	2015	MWW	H	60	58	NonAIDS	4.56	4.56	540	540	10	316	SIDEFF	INNTI	2N+1NN	0	4	32	28	4		789									YES		894	1.5	YES	YES				1.5	1.6
50998437899	2015	YES	VIH		NO	NO	YES	2015	Woman	F	29	27	NonAIDS	6.27	6.01	220	301	1	36	Simplification	IPb	2N+1IPb	2	6	132	124	8		818	352	3.44	NO
50998437910	2015	YES	VIH		NO	NO	NO	2015	Woman	F	38	36	NonAIDS	2	5.1	351.4	351.4	22	671	Simplification	IPb	2N+1IPb	27	97	272	148	124		831		3.2	NO		2.9	NO			NO										3
50998437943	2015	YES	VIH		YES	NO	NO	2015	MWM	H	71	69	NonAIDS	4.74	4.74	285	285	5	152	Simplification	INSTI	2N+1II	7	50	121	64	57		735
50998437967	2015	YES	VIH		NO	NO	YES	2015	MWW	H	36	34	NonAIDS	7.41	3.77	185	279	22	648		INNTI	2N+1NN	2	232	469	235	234		869															383	1.54	YES
50998438030	2015	YES	VIH		ND	ND	NO	2014	MWM	H	33	30	NonAIDS		4.32		114	28	843		INSTI	2N+1II	392	14	497	91	406		847	217	1.91	NO	237	1.6	YES
50998438043	2013	YES	VIH		NO	NO	NO	2013	MWM	H	28	24	NonAIDS	3.9	3.9	658	658	3	84	Other	IPb	2N+1IPb	10	35	194	149	45		1667									YES						840	1.3	YES		1.6
50998438095	2015	YES	VIH		NO	NO	NO	2015	MWW	H	68	66	NonAIDS	5.42	5.42	385	385	4	118	Simplification	IPb	2N+1IPb	3	4	475	468	7		821	515	3.29	NO						NO						857	1.54	YES		1.76
50998438103	2015	YES	VIH		YES	YES	NO	2015	Woman	F	65	63	AIDS	5.9	5.9	99	99	7	204	Simplification	IPb	2N+1IPb	0	14	218	204	14	23	743	262	3.39	NO	372	2.42	NO
50998438104	2015	YES	VIH		YES	YES	NO	2015	MWW	H	54	52	AIDS	3.8	3.39	79	79	28	824		INNTI	2N+1NN	3	12	50	35	15	3	745									YES					NO	378	1.98	NO	2.06	1.6
50998438107	2015	YES	VIH		NO	NO	NO	2015	MWW	H	50	48	NonAIDS	1.6	1.54	470	435	15	427		INNTI	2N+1NN	15	416	15	-416	431		794				415	1.54	YES
50998438148	2015	YES	VIH		NO	NO	NO	2015	MWM	H	38	36	NonAIDS	3.81	3.81	702	702	27	809		INNTI	2N+1NN	0	0	33	33	0		806									YES					YES	604	1.54	YES	1.54	1.6
50998438159	2011	YES	VIH		NO	NO	NO	2011	Woman	F	50	44	NonAIDS	6.63	6.7	365	392	12	376	Failure	IPb	2N+1IPb	17	56	493	420	73		2446	305	4.24	NO						NO		262	1.34	YES						3.03
50998438161	2015	YES	VIH		YES	NO	NO	2015	MWM	H	38	36	NonAIDS	4.39	4.39	204	204	21	628	Other	INSTI	2N+1II	12	15	60	33	27		790	287	1.6	YES
50998438233	2015	YES	VIH		NO	NO	NO	2015	Woman	F	34	32	NonAIDS	3.2	3.2	384.5	384.5	26	787	Simplification	IPb	2N+1IPb	12	28	75	35	40		745		1.3	YES						YES						342	1.3	YES		1.3
50998438237	2015	NO	VIH		YES	YES	NO	2015	Woman	F	70	69	AIDS	3.64	3.64	106		3	88	Other	IPb	2N+1IPb	5	11	101	85	16	0	99				130	1.6	YES
50998438241	2011	NO	VIH		NO	NO	NO	2010	Woman	F	38	31	NonAIDS	2.6	3	768	536	13	400	Simplification	IPb	2N+1IPb	27	504	562	31	531		2478	340	1.3	YES				533	1.3		YES	899	1.3	YES		908	1.3	YES
50998438265	2015	YES	VIH		ND	ND	NO	2014	Woman	F	34	31	NonAIDS		5.37		452	14	434	Simplification	IPb	2N+1IPb	455	114	795	226	569		625	496	3.06	NO
50998438269	2015	YES	VIH		NO	NO	NO	2014	MWM	H	32	29	NonAIDS	4.4	5.22	976.3	776	16	510	Simplification	IPb	2N+1IPb	407	154	729	168	561		699									NO										3.7
50998438277	2015	YES	VIH		YES	NO	NO	2015	Woman	F	30	28	AIDS	5.3	5.3	611.4	611	10	281	Simplification	INSTI	2N+1II	3	88	372	281	91	0	712	614	2.14	NO						NO					YES				1.54	1.67
50998438304	2015	YES	VIH		NO	NO	NO	2015	MWM	H	39	37	NonAIDS	4.4	4.06	456	456	22	661		INNTI	2N+1NN	20	81	140	39	101		723														YES				1.54
50998438312	2015	YES	VIH		YES	YES	NO	2015	MWM	H	49	47	NonAIDS	3.47	3.39	170	170	24	748	Other	INNTI	2N+1NN	8	37	80	35	45		632	231	1.6	YES	171	1.8	NO					251	1.54	YES
50998438319	2015	YES	VIH		YES	NO	NO	2015	MWW	H	32	30	NonAIDS	4.1	4.1	308	252	10	299	SIDEFF	INNTI	2N+1NN	20	42	363	301	62		645				290	2.73	NO								YES				1.5
50998438327	2015	NO	VIH		NO	NO	NO	2015	MWM	H	20	18	NonAIDS	4.2	4.2	899	899	23	672		INNTI	2N+1NN	0	69	328	259	69		671	1244	2.66	NO
50998438328	2015	YES	VIH		YES	NO	NO	2015	Woman	F	36	34	NonAIDS	4.8	4.8	313	313	22	670		IPb	2N+1IPb	0	71	323	252	71		659
50998438334	2015	YES	VIH		NO	NO	NO	2015	MWM	H	76	74	NonAIDS	3.37	3.37	1043	1043	10	309	SIDEFF	INNTI	2N+1NN	6	12	119	101	18		699							894	1.6		YES	926	1.6	YES	YES				1.6
50998438789	2016	NO	VIH		ND	ND	NO	2015	Woman	F	27	26	NonAIDS				286	3	90	Other	IPb	2N+1IPb	137	0			137		208
50998438791	2016	YES	VIH		ND	ND	NO	2011	Woman	F	31	25	NonAIDS		1.6		535	23	679		IPb	2N+1IPb	1713	0	1713	0	1713		641
50998439021	2015	NO	VIH		NO	NO	NO	2015	Woman	F	36	34	NonAIDS	4.4	4.4	440	440	19	586	Simplification	IPb	2N+1IPb	21	28	635	586	49		865				377	2.7	NO
50998439081	2013	NO	VIH		ND	ND	NO	2011	Woman	F	36	30	NonAIDS		4.34		364	41	1261	Simplification	IPb	2N+1IPb	671	50	1527	806	721		1704
50998439110	2015	NO	VIH		NO	NO	NO	2015	MWM	H	29	28	NonAIDS	4.4	4.4	727	727	26	783		INSTI	2N+1II	27	19	105	59	46		259
50998439275	2012	YES	VIH		YES	YES	NO	2012	Woman	F	33	28	NonAIDS	5.02	5.02	80.3	80.3	21	662	Simplification	IPb	2N+1IPb	17	26	591	548	43		2038		2.88	NO		1.54	YES		1.9	NO	NO					352	1.3	YES		2.18
50998439513	2011	YES	VIH		NO	NO	NO	2011	MWM	H	36	30	NonAIDS	4.8	4.8	433	433	5	163	Other	IPb	2N+1IPb	46	0	1280	1234	46		2279	508	2.51	NO
50998439785	2017	NO	VIH		ND	ND	NO	2015	MWM	H	26	24	NonAIDS		5.5		281.4	8	232	Simplification	IPb	2N+1IPb	756	125	950	69	881		230
50998439934	2015	YES	VIH		NO	NO	NO	2015	MWM	H	27	25	NonAIDS	4.2	4.2	508.3	508.3	33	987		INNTI	2N+1NN	11	12	289	266	23		937											514	1.3	YES			1.3	YES
50998440057	2013	YES	VIH		YES	YES	NO	2013	MWW	H	56	52	NonAIDS	5.2	5.2	70	70	22	691	Simplification	IPb	2N+1IPb	14	9	336	313	23		1609				80	1.6	YES		1.34		YES						1.3	YES
50998440080	2011	YES	VIH		NO	NO	NO	2011	MWW	H	43	37	NonAIDS	4.99	5.6	559	368	22	663	Simplification	IPb	2N+1IPb	26	849	1071	196	875		2311															847	1.6	YES
50998440119	2015	YES	VIH		ND	ND	NO	2013	Woman	F	30	26	NonAIDS		5.05		87	31	963	Other	INSTI	2N+1II	854	7	1216	355	861		879							197	1.41		YES	259	1.3	YES
50998440235	2014	YES	VIH		NO	NO	YES	2014	MWM	H	25	22	NonAIDS	6.26	6.26	352	352	43	1284		INSTI	2N+1II	9	2	186	175	11		1252	964	2.36	NO	815	1.66	NO	844	1.3	YES	YES					965	1.3	YES		1.3
50998440320	2017	NO	VIH		ND	ND	NO	2015	MWM	H	34	32	AIDS		6.3		40	5	147	Failure	INSTI	2N+1II	805	11			816	770	286								2.05		NO
60000148953	2010	YES	VIH		NO	NO	NO	2010	MWM	H	32	25	NonAIDS	4.08	3.98	459.4	568	11	315	SIDEFF	INNTI	2N+1NN	3	535	671	133	538		2747	820	1.9	NO						NO						717	1.3	YES		4.5
60009258450	2011	YES	VIH		YES	YES	NO	2011	Woman	F	33	29	NonAIDS	4.36	4.36	153	153	0	14	Other	IPb	2N+1IPb	36	7	141	98	43		1413	229	2.42	NO	195	1.6	YES	301	1.3		YES	286	1.6	YES		286	1.3	YES
60015667141	2012	YES	VIH		YES	NO	NO	2012	MWM	H	63	58	NonAIDS	4.57	4.48	300.5	252	27	836	Other	INNTI	2N+1NN	5	108	445	332	113		1864	401	2.87	NO												556	1.3	YES
60023784817	2011	NO	VIH		NO	NO	NO	2011	MWM	H	28	24	NonAIDS	3.14	3.61	416	501	4	95	Other	IPb	2N+1IPb	15	146			161		1470	548	1.99	NO						NO										1.99
60027187527	2012	YES	VIH		YES	NO	NO	2012	MWW	H	53	50	NonAIDS	4.76	4.76	275	275	15	453	SIDEFF	IPb	2N+1IPb	4	57	538	477	61		860	356	3.2	NO													1.3	YES
60041652859	2012	YES	VIH		ND	ND	NO	2010	Woman	F	54	47	NonAIDS		4.26		477	17	491	Other	INNTI	2N+1NN	483	293	868	92	776		2130	582	2.36	NO	647	1.3	YES	540	1.3		YES
60065785706	2011	YES	VIH&HEP	VHB	YES	YES	NO	2011	MWM	H	51	45	AIDS	5.67	5.56	49	36	1	53	SIDEFF	IPb	2N+1IPb	22	0	112	90	22	0	2207				26	1.6	YES	309	1.95	NO	NO	267	2.18	NO		219	1.6	YES		1.74
60072185696	2011	YES	VIH		NO	NO	NO	2011	Woman	F	43	37	NonAIDS	3.87	4.6	737.6	377.3	13	413	Other	Other		41	316	476	119	357		2367	647	2.56	NO	701	1.94	NO	831	1.6		YES				NO		1.7	NO	4.6
60083553553	2012	NO	VIH&HEP		NO	NO	NO	2012	MWM	H	38	33	NonAIDS	4.04	4.04	546	546	5	139	Simplification	IPb	2N+1IPb	49	8	294	237	57		1624	679	2.46	NO
60092891872	2012	YES	VIH		NO	NO	NO	2012	Woman	F	44	39	NonAIDS	3.85	4.2	1903.2	1324	10	299	SIDEFF	IPb	2N+1IPb	22	734	950	194	756		1875							1981	1.3		YES
60117763698	2012	YES	VIH		YES	YES	NO	2012	MWM	H	61	56	NonAIDS	5.16	5.16	197	197	16	482	Other	INSTI	2N+1II	11	5	379	363	16		1824	371	2.13	NO	299	1.7	NO	263	1.6		YES		1.3	YES	YES		1.4	YES	1.3
60117778957	2012	YES	VIH		NO	NO	NO	2012	Woman	F	22	17	NonAIDS	3.65	4.7	727	661	17	498	SIDEFF	INNTI	2N+1NN	14	343	680	323	357		1956	875	2.1	NO	971	3.9	NO
60121685207	2012	YES	VIH&HEP	VHC&VHB	YES	YES	NO	2012	Woman	F	42	37	NonAIDS	5.74	5.74	143	143	0	14	Other	IPb	2N+1IPb	27	0	457	430	27		1862															410	1.3	YES
60147030056	2012	YES	VIH		YES	YES	NO	2012	MWW	H	69	64	NonAIDS	4.95	4.95	30	30	10	316	SIDEFF	IPb	2N+1IPb	9	5	188	174	14		2049	45	3.09	NO	61	2.3	NO	81	1.3	YES	YES	81	1.3	YES	YES	102	1.3	YES	1.3	1.3
60154720486	2012	NO	VIH&HEP	VHC	ND	ND	NO	2011	Woman	F	38	32	NonAIDS					2	48	Intensification	IPb	2N+1IPb	379	0	1882	1503	379		1881														NO				3.74
60157391072	2012	YES	VIH		YES	NO	NO	2012	MWW	H	55	50	NonAIDS	5.01	4.53	211	191	20	605	SIDEFF	IPb	2N+1IPb	19	31	334	284	50		1786	232	2.48	NO	143	1.7	NO	273	1.6		YES						1.3	YES
60169658840	2011	YES	VIH		YES	YES	NO	2011	MWW	H	35	29	NonAIDS	5.54	5.54	19.2	51	27	823	Simplification	IPb	2N+1IPb	6	28	157	123	34		2238														NO	210	1.3	YES	1.77
60179989040	2010	YES	VIH&HEP	VHB	YES	NO	NO	2010	Woman	F	42	35	NonAIDS	4.69	4.69	278.2	278.2	45	1376	Simplification	IPb	2N+1IPb	22	18	231	191	40		2441		2.67	NO				406	1.3		YES
60187526942	2010	YES	VIH		NO	NO	NO	2010	MWW	H	31	27	NonAIDS	1.3	1.3	726.4	726.4	39	1180	SIDEFF	INNTI	2N+1NN	42	0	42	0	42		1328									YES					YES				1.6	1.3
60224224270	2012	YES	VIH		YES	NO	NO	2012	MWM	H	42	37	NonAIDS	4.61	4.61	241	241	32	973	Simplification	IPb	2N+1IPb	16	0	211	195	16		2099	313	2.79	NO					1.3		YES					524	1.3	YES
60231823147	2011	NO	VIH		NO	NO	NO	2010	Woman	F	30	28	NonAIDS	4.59	4.6	480	572.1	79	2406		IPb	2N+1IPb	217	15	421	189	232		353							674	1.6		YES
60274181545	2012	YES	VIH&HEP	VHB	YES	YES	NO	2012	MWM	H	45	40	AIDS	5.75	5.75	27	27	12	364	Failure	IPb	2N+1IPb	19	0	831	812	19	110	2117							80	1.9	NO	NO					77	5.6	NO		1.9
60278240442	2011	YES	VIH		NO	NO	NO	2011	MWM	H	34	28	NonAIDS	4.42	4.42	589.4	589.4	22	671	Simplification	IPb	2N+1IPb	14	0	217	203	14		2338		2.77	NO												981	1.3	YES
60278419137	2011	YES	VIH		YES	NO	NO	2011	Woman	F	62	56	NonAIDS	5.06	5.17	222.4	151.2	51	1562	Simplification	INSTI	2N+1II	58	26	113	29	84		2413		1.7	NO		1.7	NO	349	1.76	NO	NO				NO				1.7	1.7
60284481228	2012	YES	VIH&HEP	VHC	YES	NO	NO	2012	MWW	H	64	59	NonAIDS	4.41	4.41	221	221	25	770	Simplification	INSTI	2N+1II	15	8	135	112	23		1629	223	1.6	YES				342	1.3		YES	181	1.3	YES	YES		1.3	YES	1.3
60289068103	2010	YES	VIH		YES	NO	NO	2010	Woman	F	40	33	NonAIDS	4.56	4.56	333.5	333.5	39	1195	Failure	IPb	2N+1IPb	13	1	167	153	14		2386		2.4	NO						YES						397	1.3	YES		1.6
60300884426	2012	YES	VIH		YES	YES	NO	2012	Woman	F	41	36	NonAIDS	4.21	4.21	151	151	3	91	Simplification	INNTI	2N+1NN	34	0	49	15	34		2072							109	1.3		YES				YES	197	1.3	YES	1.3
60300986886	2012	YES	VIH&HEP	VHB	NO	NO	YES	2012	MWM	H	49	44	NonAIDS	3.81	4.11	329	245	3	90	Simplification	IPb	2N+1IPb	14	8	308	286	22		2018				509	1.6	YES	434	1.3	YES	YES									1.3
60318706691	2012	YES	VIH		NO	NO	NO	2012	MWM	H	51	46	NonAIDS	4.83	4.83	463	463	36	1103	Simplification	INSTI	2N+1II	6	9	43	28	15		2023	965	1.3	YES											YES	1235	1.3	YES	1.3
60327306092	2010	YES	VIH		NO	NO	NO	2010	MWW	H	40	33	NonAIDS	4.44	4.44	417.2	417.2	47	1408	SIDEFF	INNTI	2N+1NN	6	14	210	190	20		2724		2.75	NO					1.9		NO		1.6	YES
60332038522	2011	YES	VIH		YES	NO	NO	2011	Woman	F	41	35	NonAIDS	3.9	3.9	221	221	7	232	Simplification	IPb	2N+1IPb	11	0	105	94	11		2157	317	2.46	NO	279	1.6	YES			YES										1.3
60343700588	2010	YES	VIH		YES	YES	NO	2010	Woman	F	48	41	NonAIDS	3.49	3.49	167.4	167.4	26	817	Simplification	INSTI	2N+1II	17	1	76	58	18		2624					1.3	YES									364	1.6	YES
60362819851	2012	YES	VIH		YES	YES	NO	2012	Woman	F	48	43	NonAIDS	4.57	4.43	96	112	19	590	Simplification	INSTI	2N+1II	9	45	216	162	54		1874	173	1.6	YES									1.3	YES			1.3	YES
60366261780	2012	YES	VIH		YES	YES	NO	2012	MWM	H	48	43	NonAIDS	5.82	5.82	141	141	57	1742	Simplification	INNTI	2N+1NN	14	42	817	761	56		1784	386	3.4	NO						NO										2
60368694484	2012	YES	VIH		NO	NO	NO	2012	Woman	F	32	27	NonAIDS	3.91	3.63	479	470	18	532	SIDEFF	IPb	2N+1IPb	20	29	79	30	49		2094	485	1.6	YES				848	1.3		YES					866	1.3	YES
60380306423	2011	YES	VIH		YES	NO	NO	2011	Woman	F	44	38	NonAIDS	4.87	4.99	342.6	312	19	579	Simplification	IPb	2N+1IPb	7	79	176	90	86		2366	550	2.27	NO	572	1.6	YES			YES						540	1.3	YES		1.6
60394481838	2012	NO	VIH		YES	YES	NO	2012	Woman	F	33	33	NonAIDS	4.29	4.32	135	135	64	1943		INNTI	2N+1NN	6	15			21		90	110	1.3	YES
60416149318	2012	YES	VIH		NO	NO	NO	2012	MWW	H	64	59	NonAIDS	3.92	4.19	616	828	3	92	SIDEFF	IPb	2N+1IPb	2	26	120	92	28		1784	647	2.2	NO	910	1.3	YES								YES	932	1.3	YES	1.3
60428096950	2010	NO	VIH		YES	YES	NO	2010	MWW	H	57	57	NonAIDS	5.76	5.76	86.2	86.2	2	58	SIDEFF	IPb	2N+1IPb	14	1			15		158
60428341091	2010	YES	VIH		NO	NO	NO	2010	MWM	H	43	36	NonAIDS	3.96	4.1	436.5	385	49	1474		INNTI	2N+1NN	5	1191	1370	174	1196		2567								1.3		YES
60468497872	2011	YES	VIH		ND	ND	NO	2011	Woman	F	29	23	NonAIDS		4.32		492.2	16	484	Other	Other		95	160	297	42	255		2142														YES		4	NO	1.6
60472371399	2010	YES	VIH&HEP	VHB	YES	NO	NO	2010	Woman	F	49	42	NonAIDS	4.98	4.98	230.9	230.9	69	2107	Failure	INNTI	2N+1NN	37	12	183	134	49		2665		2.21	NO						YES										1.3
60477962673	2010	YES	VIH		NO	NO	NO	2010	Woman	F	59	52	NonAIDS	5.1	5.1	498.8	375.6	27	811	SIDEFF	IPb	2N+1IPb	12	379	573	182	391		2745	458	3	NO	580	2.33	NO	690	1.6	NO	YES	634	1.3	YES						5.09
60534420192	2011	YES	VIH		NO	NO	NO	2011	Woman	F	37	31	NonAIDS	3.35	3.35	366.9	366.9	0	10	SIDEFF	IPb	2N+1IPb	52	0	84	32	52		2397		1.6	YES		1.3	YES	499	1.3		YES
60563972115	2012	YES	VIH		NO	NO	YES	2012	MWM	H	39	34	NonAIDS	4.1	3.98	605	605	3	89	SIDEFF	IPb	2N+1IPb	13	8	110	89	21		1835	673	1.62	NO	570	1.3	YES					751	1.3	YES	YES	993	1.3	YES	1.3
60601417184	2012	YES	VIH		YES	NO	NO	2012	Woman	F	56	52	NonAIDS	3.75	3.75	276	276	4	133	Other	INNTI	2N+1NN	46	0	89	43	46		1499				381	1.3	YES			YES		477	1.3	YES			1.3	YES		1.3
60630901515	2011	NO	VIH		ND	ND	NO	2010	MWM	H	40	39	NonAIDS		4.16		438	80	2418		IPb	2N+1IPb	186	0			186		0									NO										4.16
60683803737	2010	YES	VIH		ND	ND	NO	2010	Woman	F	36	30	NonAIDS		3.06		327.4	4	124	Other	INNTI	2N+1NN	105	17			122		2227					3.11	NO		3.05		NO
60770977199	2010	YES	VIH		YES	NO	NO	2010	Woman	F	37	30	NonAIDS	3.54	3.54	242.8	242.8	9	264	SIDEFF	IPb	2N+1IPb	14	14	110	82	28		2688		2.2	NO		1.9	NO		1.3	YES	YES				YES	297	1.3	YES	1.3	1.3
60790493190	2011	YES	VIH		YES	YES	NO	2011	Woman	F	53	47	NonAIDS	5.81	5.6	187.2	181.5	52	1583	Simplification	Other	2N	27	29	140	84	56		2361		1.92	NO		1.7	NO		1.7	NO	NO	617	1.7	NO						1.7
60819378078	2012	YES	VIH		NO	NO	NO	2012	MWM	H	32	27	NonAIDS	1.63	4	1000	950	46	1384		INNTI	2N+1NN	5	743	1005	257	748		2080												1.3	YES		751	1.3	YES
60828029811	2011	YES	VIH		YES	NO	NO	2011	MWM	H	51	45	NonAIDS	4.82	4.82	339.2	339.2	0	12	SIDEFF	INNTI	2N+1NN	14	13	74	47	27		2247									YES						467	1.3	YES		1.3
60859962105	2012	YES	VIH		YES	NO	NO	2012	MWM	H	41	36	NonAIDS	4.8	4.8	268	268	11	341	Simplification	IPb	2N+1IPb	13	9	229	207	22		2009	497	2.89	NO	605	1.6	YES										1.3	YES
60859996974	2012	YES	VIH		NO	NO	NO	2012	Woman	F	35	30	NonAIDS	3.57	3.57	664	664	9	274	Other	IPb	2N+1IPb	14	9	129	106	23		2019	902	1.8	NO								932	1.3	YES		1034	1.3	YES
60889897644	2010	YES	VIH		NO	NO	NO	2010	Woman	F	35	28	NonAIDS	3.38	3.1	412.8	187	33	993		INNTI	2N+1NN	9	1663	1869	197	1672		2436																1.3	YES
60898671448	2012	YES	VIH		YES	YES	NO	2012	Woman	F	58	53	AIDS	5.56	5.56	263	263	2	71	SIDEFF	INNTI	2N+1NN	13	63	181	105	76	22	1954	373	3.12	NO				289	1.3	YES	YES	316	1.3	YES						1.3
60901958644	2010	NO	VIH		YES	YES	NO	2010	Woman	F	20	20	NonAIDS	4.69	4.69	136	136	91	2747		IPb	2N+1IPb	14	0			14		32
60903392970	2010	YES	VIH		NO	NO	NO	2010	Woman	F	35	32	NonAIDS	5.06	4.9	615.7	803.5	7	196	Simplification	IPb	2N+1IPb	31	23	172	118	54		1199									YES						1281	2.32	NO		1.3
60914464294	2012	YES	VIH		NO	NO	NO	2012	MWM	H	35	31	NonAIDS	3.6	4.2	618	909	52	1560		INNTI	2N+1NN	5	567	846	274	572		1456	1037	1.8	NO									1.3	YES			1.3	YES
60920849025	2011	YES	VIH		YES	YES	NO	2011	MWW	H	50	44	AIDS	6.76	6.76	228.5	228.5	4	130	Simplification	IPb	2N+1IPb	0	10	106	96	10	3	2281	702	3.43	NO		1.6	YES	677	2.22	NO	NO	774	1.3	YES	YES	702	1.47	YES	1.3	2.22
60933341443	2012	YES	VIH		NO	NO	YES	2012	MWM	H	36	31	NonAIDS	6.88	6.74	582.8	582.8	10	298	Simplification	IPb	2N+1IPb	6	0	137	131	6		2000	1070	3.34	NO	1304	1.96	NO	997	1.3	YES	YES				YES				1.3	1.3
60967724025	2012	YES	VIH		YES	YES	NO	2012	MWM	H	45	40	NonAIDS	5.24	5.24	139	139	15	478	Simplification	IPb	2N+1IPb	21	1	500	478	22		1963	214	3.2	NO				362	1.68	NO	NO				YES		1.9	NO	1.4	1.68
60996624171	2011	YES	VIH&HEP	VHC	YES	YES	NO	2011	MWM	H	47	44	NonAIDS	4.29	4.32	126	113	18	572	Simplification	IPb	2N+1IPb	2	14	105	89	16		949	192	1.89	NO	231	1.3	YES	254	1.3		YES					446	1.4	YES
60999599640	2013	YES	VIH&HEP	VHC	YES	YES	NO	2013	MWW	H	50	46	NonAIDS	5.4	5.1	99	131	6	200	Failure	IPb	2N+1IPb	10	14	1148	1124	24		1771	162	3.5	NO		2.8	NO		2.5		NO		2.2	NO			1.3	YES
60999599642	2013	NO	VIH		NO	NO	NO	2013	Woman	F	29	25	NonAIDS	1.5	2.2	431	356	8	243	Simplification	IPb	2N+1IPb	15	131	276	130	146		1666														YES				1.3
60999599644	2013	YES	VIH		NO	NO	NO	2013	Woman	F	56	52	NonAIDS	2.7	2.7	580.5	528	10	317	Simplification	IPb	2N+1IPb	2	3	119	114	5		1720	567	1.3	YES											YES	798	1.3	YES	1.3
60999599645	2013	YES	VIH		NO	NO	NO	2012	Woman	F	30	25	NonAIDS	2.9	2.6	653	289	39	1162		Other	2N	354	585	974	35	939		1673	351	1.3	YES											NO				2.1
60999599647	2013	YES	VIH		ND	ND	NO	2011	MWM	H	51	45	NonAIDS		1.3		554.3	23	700	SIDEFF	INNTI	2N+1NN	703	0	669	-34	703		1694
60999599648	2013	YES	VIH		NO	NO	NO	2013	MWM	H	49	45	NonAIDS	4.4	4.4	391	391	6	196	SIDEFF	IPb	2N+1IPb	11	0	137	126	11		1609	571	2.5	NO	556	1.4	YES								YES	794	1.3	YES	1.3
60999599653	2013	YES	VIH		YES	NO	NO	2013	MWM	H	52	48	NonAIDS	4.5	4.5	328	328	4	105	Simplification	IPb	2N+1IPb	9	0	205	196	9		1513	851	3	NO
60999599654	2013	YES	VIH		NO	NO	NO	2013	MWM	H	25	21	NonAIDS	4.6	4.6	482	482	4	128	Simplification	IPb	2N+1IPb	8	0	118	110	8		1605	618	2.1	NO						YES						578	1.3	YES		1.3
60999599655	2013	YES	VIH		NO	NO	NO	2013	MWM	H	42	38	NonAIDS	3.9	4.4	837	665	25	763	Other	INNTI	2N+1NN	1	196	400	203	197		1638				906	1.5	YES			NO							1.3	YES		4.4
60999599657	2011	NO	VIH		ND	ND	NO	2010	Woman	F	40	33	NonAIDS				107	40	1222	Simplification	IPb	2N+1IPb	506	25	1124	593	531		2283							110	1.6	NO	YES									4.7
60999599658	2013	NO	VIH		YES	NO	NO	2013	Woman	F	19	18	NonAIDS	3.8	3.8	317	317	0	7	SIDEFF	IPb	2N+1IPb	24	19	119	76	43		340
60999599659	2013	YES	VIH		YES	YES	NO	2013	MWW	H	48	44	NonAIDS	5	5	112	112	3	94	Simplification	Other	1IPb+1II	4	15	153	134	19		1586																1.3	YES
60999599661	2013	YES	VIH&HEP	VHC	NO	NO	NO	2013	MWM	H	29	26	NonAIDS	3.4	3.3	754	1103	20	610	Other	INNTI	2N+1NN	14	14	324	296	28		1252	895	1.5	YES	1154	1.3	YES					1147	1.3	YES		1668	1.3	YES
60999599662	2013	YES	VIH&HEP	VHB	YES	YES	NO	2013	MWW	H	49	45	NonAIDS	5.7	5.7	24.6	24.6	0	9	Other	Other	1N+1IPb	25	0	234	209	25		1524																1.3	YES
60999599663	2013	YES	VIH		NO	NO	NO	2013	Woman	F	22	18	NonAIDS	4.8	4.8	636	636	7	211	Simplification	INSTI	2N+1II	19	9	103	75	28		1571								1.3		YES
60999599665	2013	YES	VIH		NO	NO	NO	2013	Woman	F	36	32	NonAIDS	2.7	2.7	592	592	1	32	Failure	INNTI	2N+1NN	38	6	115	71	44		1568	1063	1.8	NO								946	1.62	NO	YES				1.3
60999599666	2013	YES	VIH		YES	YES	NO	2013	MWW	H	50	46	NonAIDS	2.6	2.6	150	150	12	360	Simplification	INSTI	2N+1II	4	0	129	125	4		1291												1.3	YES	YES				1.3
60999599670	2013	YES	VIH		YES	YES	NO	2013	MWW	H	43	42	NonAIDS	4.3	4.3	95	95	11	332	Simplification	INSTI	2N+1II	0	10	42	32	10		447		1.3	YES		1.3	YES
60999599672	2013	YES	VIH		YES	NO	NO	2013	MWM	H	27	23	NonAIDS	4.2	4.2	348	348	54	1616		INNTI	2N+1NN	7	18	117	92	25		1587	510	1.9	NO	538	1.3	YES								YES				1.3
60999599678	2013	YES	VIH		NO	NO	NO	2013	Woman	F	50	46	NonAIDS	4.4	4.3	686	686	53	1609		INNTI	2N+1NN	7	4	103	92	11		1589	660	1.5	YES		1.3	YES		1.3	YES	YES									1.3
60999599679	2013	NO	VIH		NO	NO	NO	2013	Woman	F	23	21	NonAIDS	4.2	3.8	448	657	52	1567		INNTI	2N+1NN	56	42	168	70	98		580	597	1.3	YES						YES							4	NO		1.3
60999599681	2013	NO	VIH		YES	YES	NO	2013	MWM	H	36	32	NonAIDS	5.7	5.6	126.8	103	43	1289	Simplification	IPb	2N+1IPb	15	21	1325	1289	36		1402	263	3.3	NO					1.3		YES
60999599682	2013	YES	VIH		YES	NO	NO	2013	Woman	F	46	42	NonAIDS	5.1	4.6	288	288	14	440	Simplification	IPb	2N+1IPb	23	0	613	590	23		1504	401	3.7	NO		2.6	NO			NO		580	1.3	YES	NO				1.8	1.8
60999599685	2010	YES	VIH		NO	NO	NO	2010	Woman	F	38	31	NonAIDS	3.84	4.5	456	605.4	9	285	Simplification	IPb	2N+1IPb	21	108	193	64	129		2668					1.6	YES			YES					YES		1.6	YES	1.6	1.6
60999599689	2013	NO	VIH		YES	YES	NO	2013	Woman	F	21	20	NonAIDS	4.6	4.6	154	154	51	1531		IPb	2N+1IPb	7	20	137	110	27		145	246	2.4	NO
60999599690	2013	YES	VIH		ND	ND	NO	2011	MWM	H	63	57	NonAIDS		4.5		546	20	589	Other	INNTI	2N+1NN	998	41	1221	182	1039		1428		2.2	NO					1.3		YES					773	1.3	YES
60999599695	2013	YES	VIH		ND	ND	NO	2011	Woman	F	39	33	NonAIDS		1.3		278	7	211	SIDEFF	IPb	2N+1IPb	874	7	874	-7	881		1506															332	1.3	YES
60999599696	2013	YES	VIH&HEP	VHB	YES	YES	NO	2013	Woman	F	44	40	NonAIDS	5.3	5.3	147	147	2	64	SIDEFF	IPb	2N+1IPb	21	49	246	176	70		1408		3.2	NO		1.3	YES	329	1.3	YES	YES									1.3
60999599699	2013	YES	VIH		NO	NO	NO	2013	Woman	F	38	34	NonAIDS	1.3	1.3	376	376	49	1477		INNTI	2N+1NN	0	14	0	-14	14		1403		1.3	YES
60999599703	2013	YES	VIH&HEP	VHC	YES	YES	NO	2013	MWW	H	42	38	NonAIDS	4.8	4.8	7.1	9	8	252	Simplification	IPb	2N+1IPb	7	13	131	111	20		1301														YES				1.3
60999599704	2013	YES	VIH&HEP	VHC	NO	NO	NO	2013	Woman	F	43	39	NonAIDS	1.8	2.6	506	436.6	6	196	Simplification	Other	2N	1	152	195	42	153		1300									YES										1.3
60999599705	2013	YES	VIH		YES	NO	NO	2013	Woman	F	55	51	NonAIDS	5.4	5.4	309.4	309.4	17	505	Simplification	IPb	2N+1IPb	15	6	435	414	21		1394		3.4	NO						NO		643	1.5	YES	YES				1.5	1.9
60999599715	2014	YES	VIH		NO	NO	YES	2014	MWW	H	47	44	NonAIDS	4.4	4.4	204.3	204.3	11	325	Simplification	IPb	2N+1IPb	8	0	491	483	8		1305		1.9	NO		1.5	YES										1.3	YES
60999599717	2014	YES	VIH		NO	NO	YES	2014	MWW	H	57	54	NonAIDS	4.7	4.7	430.9	430.9	1	44	Simplification	Other	2N+1IPb+1II	5	7	203	191	12		1313								1.3		YES					79	1.3	YES
60999599723	2014	YES	VIH		YES	NO	NO	2014	MWM	H	25	22	NonAIDS	3.2	2.5	341.5	346.7	46	1384		INNTI	2N+1NN	22	0	59	37	22		1262	478	1.3	YES		1.3	YES		1.3		YES		1.3	YES		616	1.3	YES
60999599725	2014	YES	VIH		NO	NO	NO	2014	MWW	H	54	51	NonAIDS	4.4	4.4	350.8	350.8	9	291	SIDEFF	INNTI	2N+1NN	7	0	292	285	7		1260		2.3	NO								642	1.3	YES	YES				1.3
60999599727	2014	YES	VIH		YES	YES	NO	2014	MWW	H	73	70	NonAIDS	4.2	4.2	118.8	118.8	24	711	SIDEFF	INNTI	2N+1NN	4	14	134	116	18		1259		2.2	NO											YES				1.4
60999599729	2014	NO	VIH		ND	ND	NO	2013	MWW	H	45	41	NonAIDS		5.2		4.2	24	743	Simplification	IPb	2N+1IPb	325	0			325		1311
60999599734	2014	YES	VIH		YES	YES	NO	2014	MWW	H	42	39	AIDS	5.1	5.1	12	12	2	43	SIDEFF	IPb	2N+1IPb	14	0	126	112	14	0	1310	71	3.2	NO											YES				1.3
60999599737	2014	YES	VIH		NO	NO	YES	2014	MWM	H	54	51	NonAIDS	3.9	4	320.2	427	24	742	SIDEFF	INSTI	2N+1II	11	130	256	115	141		1257									YES							1.3	YES		1.6
60999599738	2014	YES	VIH		NO	NO	YES	2014	MWM	H	29	26	NonAIDS	5.2	5.2	334.4	334.4	13	408	Other	INSTI	2N+1II	0	0	452	452	0		1185	473	2.1	NO	496	1.4	YES	514	1.3	YES	YES					904	1.3	YES		1.3
60999599787	2014	YES	VIH&HEP		ND	ND	NO	2014	Woman	F	19	16	NonAIDS	5.1	5.2			5	140	Simplification	IPb	2N+1IPb	82	0	385	303	82		1260	466	1.5	YES				552	1.3		YES	522	1.3	YES		843	1.3	YES
60999599825	2014	NO	VIH		NO	NO	NO	2014	MWM	H	35	32	NonAIDS	3.3	3.3	755	755	4	126	SIDEFF	INSTI	2N+1II	11	27	69	31	38		1245		1.3	YES					1.3	YES	YES					1032	1.3	YES		1.3
60999599851	2014	YES	VIH		YES	NO	NO	2014	MWM	H	45	42	NonAIDS	4.3	4.7	260.6	262	40	1202		INNTI	2N+1NN	0	54	159	105	54		1167	501	1.8	NO												464	1.3	YES
60999599861	2014	YES	VIH&HEP	VHC&VHB	YES	NO	NO	2014	MWW	H	39	37	NonAIDS	4.6	4.5	251	251	40	1216		INSTI	2N+1II	73	28	236	135	101		615	373	1.3	YES													1.3	YES
60999599948	2014	YES	VIH		ND	ND	NO	2011	Woman	F	30	24	NonAIDS		3.2		254	4	119	Simplification	IPb	2N+1IPb	1170	20	1335	145	1190		1084	194	2.3	NO													1.3	YES
60999599978	2012	YES	VIH		YES	YES	NO	2012	Woman	F	41	36	NonAIDS	3.92	3.97	123	116	27	816	Simplification	IPb	2N+1IPb	14	49	154	91	63		1812	122	2.27	NO	112
60999600066	2014	YES	VIH		NO	NO	NO	2014	MWW	H	31	29	NonAIDS	3.3	3.3	415	415	1	27	Simplification	IPb	2N+1IPb	6	0	154	148	6		799	457	2.3	NO								861	1.3	YES	YES				1.3
60999600073	2014	NO	VIH		YES	NO	NO	2014	MWM	H	25	24	NonAIDS	4	3.9	292.8	340	8	247	Simplification	INSTI	2N+1II	9	3			12		250	559	1.3	YES		1.3	YES
60999600086	2014	YES	VIH		YES	YES	NO	2014	Woman	F	47	45	NonAIDS	5.8	1.8	20	19	14	425	Simplification	INSTI	2N+1II	275	0	334	59	275		617	33	1.3	YES						NO										1.9
60999600088	2014	YES	VIH		YES	YES	NO	2014	Woman	F	25	22	NonAIDS	4.1	3.8	166	258.8	12	377	Simplification	INSTI	2N+1II	6	16	50	28	22		1128	208	1.3	YES	229	1.3	YES						1.3	YES			1.3	YES
60999600098	2014	YES	VIH&HEP	VHB	YES	YES	NO	2014	MWW	H	49	46	NonAIDS	5.3	5.3	99	99	11	316	Failure	IPb	2N+1IPb	1	25	895	869	26		1048	133	3.7	NO		2.2	NO		1.5		YES				YES				1.6
60999600124	2014	YES	VIH		NO	NO	YES	2014	Woman	F	47	44	NonAIDS	4	4	1346	1398	1	50	Other	INNTI	2N+1NN	6	0	85	79	6		1044	857	1.3	YES
60999600129	2014	YES	VIH&HEP	VHB	NO	NO	NO	2014	Woman	F	22	19	NonAIDS	4.2	4.2	395	395	18	535	Simplification	INSTI	2N+1II	7	0	100	93	7		1058	419	1.3	YES	462	1.3	YES										1.3	YES
60999600132	2014	YES	VIH		ND	ND	NO	2014	MWM	H	29	26	NonAIDS		3.5		518	30	924	Other	INSTI		337	195	587	55	532		1006																1.3	YES
60999600134	2015	NO	VIH		YES	YES	NO	2014	Woman	F	34	33	NonAIDS	5	5	158	158	36	1082		IPb	2N+1IPb	30	0			30		127		2.8	NO
60999600136	2015	NO	VIH		YES	NO	NO	2015	MWM	H	24	22	NonAIDS	4.2	4.2	282	282	3	84	Simplification	IPb	2N+1IPb	4	0	177	173	4		908		2.5	NO	457	1.8	NO		1.3	YES	YES									1.3
60999600138	2015	YES	VIH		YES	NO	NO	2015	Woman	F	23	21	NonAIDS	1.8	5.1	246.7	172.4	8	229	Simplification	INSTI	2N+1II	4	8	218	206	12		1022		1.8	NO					1.3	YES	YES				YES				1.3	1.3
60999600139	2015	YES	VIH		NO	NO	NO	2015	MWW	H	21	19	NonAIDS	5.5	5.5	379.7	379.7	8	229	Simplification	INSTI	2N+1II	4	8	1026	1014	12		1022		2.8	NO					1.8	NO	NO				YES				1.3	1.8
60999600142	2015	YES	VIH		NO	NO	NO	2015	Woman	F	57	55	NonAIDS	1.3	3.9	451	471	4	119	Simplification	INSTI	2N+1II	0	89	117	28	89		1028		1.3	YES													1.3	YES
60999600148	2015	YES	VIH&HEP	VHC	NO	NO	NO	2015	Woman	F	48	46	NonAIDS	4.3	4.3	1386	1386	32	991	Other	INSTI	2N+1II	22	0	362	340	22		991		2.3	NO	867	1.3	YES								YES				1.3
60999600150	2015	YES	VIH&HEP	VHB	YES	YES	NO	2015	Woman	F	35	33	NonAIDS	5.1	5.1	61.2	61.2	8	243	Simplification	INSTI	2N+1II	9	16	374	349	25		827														YES				1.3
60999600157	2015	YES	VIH		YES	NO	NO	2015	MWW	H	19	17	NonAIDS	5.3	5.3	258	258	2	40	Simplification	IPb	2N+1IPb	1	12	552	539	13		977		3.5	NO				707	1.6	YES	YES		1.3	YES	YES		1.3	YES	1.3	1.6
60999600160	2015	YES	VIH		NO	NO	NO	2015	Woman	F	26	24	NonAIDS	3.5	3.4	691.3	656	1	28	Simplification	INSTI	2N+1II	12	23	63	28	35		896	922	1.3	YES												1142	1.3	YES
60999600170	2015	YES	VIH		YES	YES	NO	2015	MWW	H	71	69	NonAIDS	5.5	5.5	77.6	77.6	1	35	Simplification	INSTI	2N+1II	14	3	297	280	17		924		2.5	NO		1.6	YES	358	1.3	YES	YES		1.3	YES						1.3
60999600174	2015	YES	VIH		NO	NO	NO	2015	MWM	H	34	32	NonAIDS	4.4	4.4	716.5	716.5	13	385	Simplification	INSTI	2N+1II	11	0	116	105	11		854		1.3	YES				1112	1.3		YES						1.3	YES
60999600177	2015	YES	VIH		ND	ND	NO	2014	Woman	F	24	21	NonAIDS		4.9		570.3	3	89	Simplification	IPb	2N+1IPb	376	0			376		861					1.9	NO						2.1	NO	NO				4.9
60999600185	2014	YES	VIH		NO	NO	NO	2012	Woman	F	54	49	NonAIDS	4.9	5.2	513	392.4	7	210	Simplification	INSTI	2N+1II	696	446	1464	322	1142		1204	569	2.2	NO
60999600192	2015	YES	VIH		ND	ND	NO	2014	Woman	F	31	28	NonAIDS		1.3		940	20	592	SIDEFF	INSTI	2N+1II	465	0	465	0	465		879					1.3	YES										1.3	YES
60999600200	2015	YES	VIH		YES	YES	NO	2015	MWM	H	29	27	NonAIDS	4.1	4.1	162.8	162.8	6	185	Simplification	INSTI	2N+1II	7	0	294	287	7		763									YES							1.3	YES		1.3
60999600201	2015	YES	VIH		NO	NO	YES	2015	MWM	H	42	40	NonAIDS	5.7	5.7	532.3	532.3	14	424	Simplification	INSTI	2N+1II	0	10	373	363	10		829												1.3	YES	YES		1.3	YES	1.3
60999600204	2015	YES	VIH		NO	NO	NO	2015	MWM	H	37	35	NonAIDS	4.5	4.5	445	445	28	845		INSTI		21	0	56	35	21		727	432	1.3	YES
60999600206	2015	YES	VIH		ND	ND	NO	2015	Woman	F	45	43	NonAIDS		1.3		547	9	290	SIDEFF	INNTI	2N+1NN	242	0	242	0	242		778					1.3	YES		1.3		YES						1.3	YES
60999600213	2015	YES	VIH&HEP	VHB	NO	NO	NO	2015	Woman	F	38	36	NonAIDS	1.3	5.4	773.4	236.8	22	670		INSTI	2N+1II	1	160	40	-121	161		747		2.9	NO						NO							1.5	YES		2.9
60999600214	2015	YES	VIH		NO	NO	NO	2015	MWW	H	70	68	NonAIDS	4.1	4.1	600.3	600	8	239	Simplification	INSTI	2N+1II	19	0	51	32	19		725	757	1.3	YES
60999600217	2015	YES	VIH		NO	NO	YES	2015	Woman	F	34	32	NonAIDS	5	5	521.4	521.4	5	167	SIDEFF	INNTI	2N+1NN	0	26	446	420	26		747								1.6	YES	YES				YES				1.3	1.6
60999600219	2015	YES	VIH		ND	ND	NO	2015	MWW	H	40	38	NonAIDS		5.5		94.7	23	701	Simplification	INSTI	2N+1II	104	18	368	246	122		789									YES					YES		1.3	YES	1.3	1.3
60999600221	2015	YES	VIH		YES	YES	NO	2015	MWW	H	51	49	AIDS	5.5	5.5	54.7	54.7	14	431	Other	INSTI	2N+1II	14	15			29	33	446	52	2.1	NO		1.3	YES		2	YES	NO		1.3	YES	YES				1.5	1.5
60999600226	2015	YES	VIH&HEP	VHB	ND	ND	NO	2015	Woman	F	32	30	NonAIDS					27	821	Other	INNTI	2N+1NN	209	0	216	7	209		680																1.3	YES
60999600227	2015	YES	VIH&HEP	VHB	YES	NO	NO	2015	Woman	F	58	56	NonAIDS	1.3	5	205.1	172	25	748		INNTI	2N+1NN	48	35	0	-83	83		693	236	3.2	NO
60999600229	2015	YES	VIH		YES	NO	NO	2015	MWM	H	55	53	NonAIDS	5.2	5.3	200.7	155	2	68	Simplification	INSTI	2N+1II	13	4	336	319	17		639		1.9	NO									1.3	YES	YES		1.3	YES	1.3
60999600234	2015	YES	VIH		NO	NO	YES	2015	MWM	H	38	36	NonAIDS	5.2	5.2	262.8	262.8	2	42	Simplification	INSTI	2N+1II	13	5			18		692	677	2.5	NO	813	1.9	NO		1.6		YES
60999600235	2015	YES	VIH		NO	NO	YES	2015	MWM	H	45	43	NonAIDS	4.8	4.8	355.7	355.7	26	773		INSTI	2N+1II	16	0	398	382	16		746																1.3	YES
60999600255	2015	YES	VIH		NO	NO	NO	2015	MWM	H	50	48	NonAIDS	4.3	4.3	457.3	457.3	1	35	Simplification	INSTI	2N+1II	14	7	338	317	21		736		1.5	YES												793	1.3	YES
60999600391	2016	YES	VIH		ND	ND	NO	2010	Woman	F	47	40	NonAIDS		2.5		1297.9	23	696		Other	1II	2191	0	2231	40	2191		685					1.3	YES										1.3	YES
60999600406	2014	NO	VIH		ND	ND	NO	2010	Woman	F	56	49	NonAIDS		5.1		604.7	3	96	Other	INSTI	2N+1II	1609	135	1954	210	1744		1212																1.3	YES
60999600410	2016	YES	VIH&HEP	VHC&VHB	ND	ND	NO	2015	Woman	F	50	48	NonAIDS		5.1		345	3	96	Simplification	IPb	2N+1IPb	269	0	457	188	269		648		3.1	NO		2.5	NO		1.3		YES				NO		1.3	YES	2.5
60999600430	2016	YES	VIH		YES	YES	NO	2012	Woman	F	35	30	NonAIDS	2.3	3.6	13	340.5	21	613		Other	1IPb+1II	1474	0	1977	503	1474		559		1.4	YES					1.7		NO
60999600447	2016	NO	VIH		ND	ND	NO	2011	MWW	H	31	26	NonAIDS		2.7		332.9	19	553		INSTI	2N+1II	1794	35			1829		35		1.3	YES
60999600460	2016	YES	VIH		ND	ND	NO	2011	MWW	H	50	44	NonAIDS		1.3		737.3	18	549		INNTI	2N+1NN	1828	15	2051	208	1843		454
60999600464	2016	YES	VIH		ND	ND	NO	2013	MWW	H	39	35	NonAIDS		3.9		506.4	21	626	Simplification	INNTI	2N+1NN	1109	0	1207	98	1109		416		1.3	YES		1.3	YES										1.3	YES
60999600466	2016	YES	VIH		ND	ND	NO	2013	Woman	F	38	34	NonAIDS		4.9		68.3	1	12	Other	INNTI	2N+1NN	1111	0	1452	341	1111		503																2.2	NO
60999600474	2010	YES	VIH		YES	YES	NO	2010	MWM	H	42	35	AIDS			56		17	523	SIDEFF	IPb	2N+1IPb	0	0	422	422	0	0	2775							90	1.98	NO	NO		1.74	NO	NO				1.74	1.98
60999600486	2010	YES	VIH		YES	NO	NO	2010	MWM	H	26	19	NonAIDS	4.67	4.67	226	226	4	124	SIDEFF	IPb	2N+1IPb	4	0	104	100	4		2576					1.6	YES
60999600499	2013	YES	VIH		NO	NO	NO	2013	Woman	F	29	25	NonAIDS	2.88	2.88	369	369	6	202	Other	INNTI	2N+1NN	20	28	84	36	48		1574	263	1.6	YES				326	1.6		YES	374	1.6	YES
60999600523	2014	YES	VIH		NO	NO	NO	2014	MWW	H	50	47	NonAIDS	5.3	5.3	699.1	699.1	0	12	SIDEFF	IPb	2N+1IPb	9	21	273	243	30		1246		3.2	NO						NO					YES	914	1.6	YES	1.6	1.7
60999600529	2016	NO	VIH		ND	ND	NO	2014	Woman	F	35	32	NonAIDS		1.3		411.8	7	220	Simplification	INSTI	2N+1II	877	0	471	-406	877		330
60999600542	2016	NO	VIH&HEP	VHC	ND	ND	NO	2015	MWW	H	64	62	NonAIDS		6.2		165.3	3	102	Simplification	IPb	2N+1IPb	536	0			536		138
60999600581	2017	NO	VIH		ND	ND	NO	2012	Woman	F	36	31	NonAIDS		5.1		137.1	11	314		IPb	2N+1IPb	1712	0			1712		51
60999600598	2016	YES	VIH		ND	ND	NO	2014	Woman	F	30	27	NonAIDS		3.3		425	8	248	Other	INSTI		982	42	1048	24	1024		468	378	1.3	YES
60999600643	2017	NO	VIH		NO	NO	NO	2011	Woman	F	41	35	NonAIDS	3.2	3.2	1749.3	1749.3	1	56	SIDEFF	IPb	2N+1IPb	2373	0	2576	203	2373		150								3.5		NO
60999600651	2017	NO	VIH		ND	ND	NO	2011	MWW	H	42	36	NonAIDS		2.2		333.5	3	77		Other	1IPb+1II	2297	18			2315		62		2.1	NO		1.7	NO
60999600662	2017	NO	VIH		ND	ND	NO	2015	Woman	F	41	39	NonAIDS		1.3		622.6	2	42		INNTI	2N+1NN	889	0	882	-7	889		0
70001759828	2012	YES	VIH		NO	NO	NO	2012	MWM	H	39	34	NonAIDS	4.52	4.3	500	460	51	1547	Other	IPb	2N+1IPb	56	233	607	318	289		1780
70001873196	2010	YES	VIH		NO	NO	YES	2010	MWW	H	51	44	NonAIDS	6.51	5.6	765	908.2	10	303	SIDEFF	IPb	2N+1IPb	0	6	179	173	6		2456		2.14	NO		1.6	YES		1.6	YES	YES		1.6	YES	YES				1.6	1.6
70002341867	2010	YES	VIH		YES	NO	NO	2010	MWW	H	50	43	NonAIDS	4.34	4.36	242	305.9	34	1021	Simplification	IPb	2N+1IPb	6	130	223	87	136		2769		2.46	NO		1.6	YES		1.6	NO	YES	462	1.6	YES						2.46
70013894082	2011	YES	VIH		NO	NO	YES	2011	MWM	H	43	38	NonAIDS	5.14	5.14	675.8	675.8	1	49	SIDEFF	IPb	2N+1IPb	0	73			73		1915												1.6	YES	NO		1.88	NO	1.72
70047817409	2010	YES	VIH		YES	YES	NO	2010	Woman	F	39	32	NonAIDS	3.43	3.31	198.9	198.9	7	230	Simplification	IPb	2N+1IPb	3	0	52	49	3		2715					1.6	YES	281	1.6	YES	YES		1.6	YES	YES				1.6	1.6
70057689846	2011	YES	VIH		YES	YES	NO	2011	MWW	H	46	40	AIDS	5.56	5.56	3	3	31	937	Simplification	IPb	2N+1IPb	0	5	553	548	5	0	2491	82	2.67	NO		1.7	NO	100	1.6	YES	YES					177	1.6	YES		1.6
70071758450	2011	YES	VIH		YES	YES	NO	2011	MWM	H	44	38	AIDS	4.87		25		14	457	SIDEFF	IPb	2N+1IPb	6	0	181	175	6	0	2212					1.78	NO		1.6	YES	YES					102	1.6	YES		1.6
70097530544	2012	YES	VIH		NO	NO	NO	2012	Woman	F	39	34	NonAIDS	5.4	5.4	595.8	595.8	25	757	Simplification	IPb	2N+1IPb	8	7	365	350	15		2107												1.6	YES	YES	1254	1.75	NO	1.6
70107204616	2012	NO	VIH		YES	YES	NO	2012	MWM	H	26	21	AIDS	4.01	4.01	2	2	0	5	SIDEFF	IPb	2N+1IPb	3	10	1316	1303	13	9	2118	40	2.58	NO	60	1.66	NO
70134533108	2011	YES	VIH		YES	NO	NO	2011	MWM	H	48	42	NonAIDS	4.09	4.09	293.8	332.4	11	333	Simplification	IPb	2N+1IPb	10	43	260	207	53		2265		1.85	NO													1.6	YES
70152233303	2012	YES	VIH		YES	NO	NO	2012	MWM	H	27	23	NonAIDS	4.62	4.41	344	409	2	77	Simplification	IPb	2N+1IPb	10	154	290	126	164		1539	470	2.51	NO						NO		695	1.6	YES						2.51
70157070339	2011	YES	VIH		NO	NO	YES	2011	MWW	H	51	45	NonAIDS	5.75	5.46	530.7	406.9	10	302	Simplification	IPb	2N+1IPb	20	844	2225	1361	864		2346					2.66	NO			NO		498	1.48	YES	NO				5.24	5.5
70171703577	2010	YES	VIH		YES	NO	NO	2010	MWM	H	81	79	NonAIDS	6.31	6.31	225.9	241	0	1	Other	IPb	2N+1IPb	7	21			28		811		2.92	NO						NO		456	5.89	NO	NO		4.04	NO	4.39	2.06
70173397243	2012	YES	VIH		YES	YES	NO	2012	MWM	H	44	39	AIDS	6.33	6.76	228	228	0	9	SIDEFF	IPb	2N+1IPb	66	0	293	227	66	56	1936	340	3.72	NO				820	1.9		NO				YES	575	1.6	YES	1.6
70176967800	2011	YES	VIH		ND	ND	NO	2010	MWM	H	40	33	NonAIDS		5.64		330	16	490	Simplification	IPb	2N+1IPb	197	33	789	559	230		2176															610	1.6	YES
70189846218	2012	YES	VIH		NO	NO	NO	2012	MWW	H	54	49	NonAIDS	4.01	2.62	470	410	5	145	SIDEFF	IPb	2N+1IPb	25	77	124	22	102		2135				550	1.6	YES	420	1.6	YES	YES	600	1.6	YES	YES				1.6	1.6
70202169299	2010	YES	VIH		NO	NO	NO	2010	Woman	F	69	62	NonAIDS	1.6	3.65	700.9	377.9	63	1888		INNTI	2N+1NN	10	1017	10	-1017	1027		2825		1.6	YES		1.6	YES		1.6		YES					670	1.3	YES
70229046047	2012	NO	VIH		YES	YES	NO	2012	MWW	H	35	35	NonAIDS	4.69	4.69	144.9	144.9	70	2106		IPb	2N+1IPb	0	63			63		83
70235877633	2012	YES	VIH		NO	NO	NO	2010	Woman	F	43	40	NonAIDS	5.32	1.6	357	1010	71	2152		IPb	2N+1IPb	544	0			544		528
70237636745	2011	NO	VIH		NO	NO	NO	2011	MWM	H	49	43	NonAIDS	3.69	3.3	680	440	5	160	SIDEFF	IPb	2N+1IPb	1	918	1066	147	919		2205	600	1.8	NO				780	1.3	NO	YES									3.81
70247280300	2012	YES	VIH		NO	NO	YES	2012	MWM	H	30	28	NonAIDS	4.24	4.24	431	431	8	228	Simplification	IPb	2N+1IPb	0	15	243	228	15		495		2.38	NO											YES				1.6
70260174036	2011	YES	VIH		ND	ND	NO	2010	MWM	H	38	31	NonAIDS		3.81		330	3	94	Other	IPb	2N+1IPb	321	18	448	109	339		2486														YES				1.6
70273922146	2010	YES	VIH		NO	NO	NO	2010	Woman	F	44	41	NonAIDS	3.17	1.92	530	540	3	97	SIDEFF	IPb	2N+1IPb	0	424	612	188	424		857							470	1.6		YES
70306194484	2010	YES	VIH		NO	NO	NO	2010	MWM	H	54	47	NonAIDS	3.53	3.53	481	481	15	469	Simplification	IPb	2N+1IPb	9	21	184	154	30		2627		1.67	NO						YES					YES		1.6	YES	1.6	1.6
70318737209	2010	YES	VIH		NO	NO	NO	2010	MWW	H	43	36	NonAIDS	3.99	4.4	442	397.7	12	384	Simplification	IPb	2N+1IPb	41	266	713	406	307		2455															417	1.6	YES
70367809534	2012	NO	VIH		NO	NO	YES	2012	MWM	H	25	24	NonAIDS	5.7	5.7	370	370	2	55	SIDEFF	IPb	2N+1IPb	5	15	300	280	20		351	530	3.3	NO	570	2.1	NO
70368191004	2012	YES	VIH		YES	YES	NO	2010	MWW	H	47	40	AIDS		1.79		590	40	1228	Other	IPb	2N+1IPb	636	0	690	54	636	0	1971							577	1.64	NO	NO									2.68
70370723903	2012	YES	VIH		YES	NO	NO	2012	MWM	H	50	45	NonAIDS	6.4	6.4	280	280	16	496	Simplification	IPb	2N+1IPb	14	21	502	467	35		1992	720	4.07	NO	510	2.84	NO	640	1.7		NO					830	1.6	YES
70387935817	2012	YES	VIH		YES	NO	NO	2012	MWW	H	64	59	NonAIDS	3.8	4.3	264	250	39	1180	Simplification	IPb	2N+1IPb	17	347	427	63	364		1847														NO	400	1.3	YES	4.3
70399501979	2011	NO	VIH		YES	YES	NO	2011	MWM	H	44	43	AIDS	5.35	4.87	69	36	1	4	SIDEFF	IPb	2N+1IPb	0	19			19	0	48	105	2.54	NO
70410346627	2010	YES	VIH		ND	ND	NO	2010	Woman	F	53	46	AIDS		5.03		140	0	9	Other	IPb	2N+1IPb	316	3	698	379	319	316	2490							340	1.62		NO	430	1.86	NO	NO				2.68
70418819606	2012	YES	VIH		NO	NO	NO	2012	Woman	F	35	30	NonAIDS	5.46	5.46	457	457	67	2013		IPb	2N+1IPb	7	7	238	224	14		1995				586	2.71	NO
70438132882	2011	YES	VIH		NO	NO	NO	2011	MWW	H	29	27	NonAIDS	4.01	4.41	1127.7	1301	9	301	Simplification	IPb	2N+1IPb	156	138	485	191	294		617		2.04	NO				1187	1.6		YES		1.6	YES
70444210291	2010	YES	VIH&HEP	VHC	NO	NO	NO	2010	MWM	H	49	42	NonAIDS	4.14	4.42	387	359.4	28	864	Simplification	IPb	2N+1IPb	21	45	244	178	66		2488		2.58	NO	468	1.6	YES		1.6		YES	587	1.6	YES		599	1.6	YES
70447323024	2011	NO	VIH		YES	YES	NO	2011	Woman	F	50	45	AIDS	6.14	6.14	30	30	1	31	Other	IPb	2N+1IPb	2	7			9	17	1851		3.79	NO
70467662990	2011	YES	VIH&HEP	VHC	YES	YES	NO	2011	MWW	H	40	34	AIDS	5.79	5.79	2	2	5	175	SIDEFF	INSTI	2N+1II	0	15	99	84	15	0	2449	25	1.6	YES		1.6	YES			YES							1.6	YES		1.6
70509969056	2012	NO	VIH		YES	NO	NO	2012	MWM	H	53	48	NonAIDS	5.39	4.88	290	290	46	1406	Simplification	IPb	2N+1IPb	11	20	365	334	31		2034							390	1.6		YES				YES	420	1.6	YES	1.6
70524837673	2012	YES	VIH		YES	YES	NO	2012	Woman	F	40	35	NonAIDS	4.67	4.67	121		14	396	Simplification	Other	2N+2IPb	13	3	72	56	16		1856	121	1.6	YES		1.6	YES									508	1.6	YES
70526786268	2011	YES	VIH		NO	NO	YES	2011	MWM	H	53	47	NonAIDS	4.17	4.1	439.9	612	35	1046	Other	INSTI	2N+1II	24	860	1127	243	884		2115	662	1.3	YES								639	1.3	YES
70536632717	2010	YES	VIH		YES	YES	NO	2010	MWW	H	42	35	NonAIDS	1.6		13	13	39	1183	Simplification	IPb	2N+1IPb	7	13	402	382	20		2710		3.07	NO					1.86	NO	NO									1.86
70558895290	2012	YES	VIH		NO	NO	YES	2012	MWM	H	55	50	NonAIDS	4.96	4.96	471	472	7	213	Simplification	IPb	2N+1IPb	7	18	273	248	25		2098																1.6	YES
70563361764	2011	YES	VIH		YES	NO	NO	2011	Woman	F	41	35	NonAIDS	5.44	5.44	293.9	293.9	8	259	SIDEFF	IPb	2N+1IPb	0	13	272	259	13		2466		2.69	NO						YES										1.6
70568920314	2010	YES	VIH		ND	ND	NO	2010	Woman	F	35	29	NonAIDS		3.5		670	3	87	Simplification	IPb	2N+1IPb	186	9	1650	1455	195		2036									NO		854	1.3	YES						3.5
70619014919	2012	YES	VIH		YES	NO	NO	2012	MWW	H	59	54	NonAIDS	4.23	4.23	266	266	5	175	SIDEFF	IPb	2N+1IPb	7	14	196	175	21		2046		1.97	NO		1.6	YES	325	1.6		YES	463	1.6	YES
70637035549	2012	YES	VIH		YES	YES	NO	2012	MWW	H	38	33	AIDS	5.52	5.52	3	3	20	617	Simplification	IPb	2N+1IPb	0	13	427	414	13	0	1970	15	2.04	NO	20	1.6	YES
70638515651	2011	YES	VIH		YES	YES	NO	2011	MWM	H	68	62	NonAIDS	5	5	175.9	175.9	21	636	Simplification	IPb	2N+1IPb	8	35	327	284	43		2380					1.68	NO		1.6		YES						1.6	YES
70653103053	2010	NO	VIH		NO	NO	NO	2010	MWM	H	28	21	NonAIDS	4.82	4.68	453.8	762.3	46	1388		INSTI	2N+1II	18	1270	2145	857	1288		2534
70658214748	2012	YES	VIH&HEP	VHB	NO	NO	NO	2012	Woman	F	38	33	NonAIDS	1.3	2.81	654.9	416.1	3	98	Failure	IPb	2N+1IPb	57	95	47	-105	152		1737		3.62	NO	319	3.05	NO	531	1.6	NO	YES									3.62
70682445705	2011	YES	VIH		YES	NO	NO	2011	MWW	H	72	66	NonAIDS	4.21	4.21	324.8	324.8	13	406	Simplification	IPb	2N+1IPb	48	17	132	67	65		2192	376	2.49	NO						YES					YES				1.6	1.6
70686580837	2012	NO	VIH		NO	NO	NO	2012	Woman	F	29	28	NonAIDS	4.35	4.3	430	470	63	1902		IPb	2N+1IPb	4	33			37		279	700	2.5	NO	590	1.8	NO
70710537135	2012	YES	VIH		NO	NO	YES	2012	MWM	H	33	29	NonAIDS	6.11	6.11	166.9	166.9	18	532	Simplification	IPb	2N+1IPb	3	14	311	294	17		1673	263	3.77	NO												359	1.6	YES
70713421047	2012	YES	VIH		NO	NO	NO	2012	Woman	F	44	39	NonAIDS	4	4	481	481	8	217	Simplification	IPb	2N+1IPb	17	7	100	76	24		2099	457	1.6	YES					1.6		YES	818	1.6	YES
70751179993	2011	YES	VIH		NO	NO	NO	2011	MWM	H	36	30	NonAIDS	5.3	5.28	441	441	25	758	Simplification	IPb	2N+1IPb	4	40	339	295	44		2275		3.08	NO					2.05	NO	NO									2.27
70761425197	2010	YES	VIH		YES	YES	NO	2010	MWW	H	58	51	NonAIDS	5.26	5.26	11	9.1	13	394	Simplification	IPb	2N+1IPb	0	40	288	248	40		2757	25	1.7	NO		1.6	YES
70809520900	2012	YES	VIH		YES	YES	NO	2012	MWW	H	60	55	AIDS	6.27		35	35	1	38	SIDEFF	IPb	2N+1IPb	3	0	1466	1463	3	3	1810							250	2.8	NO	NO	240	1.9	NO		320	2.1	NO		2.8
70814556300	2010	YES	VIH		NO	NO	YES	2010	Woman	F	23	20	NonAIDS	3.8	4.91	620.9	361.8	5	138	SIDEFF	IPb	2N+1IPb	3	501	619	115	504		1015	611	2.07	NO
70815517604	2010	YES	VIH		YES	YES	NO	2010	MWW	H	60	53	AIDS	6.99	6.99	3.1		2	80	Failure	IPb	2N+1IPb	5	6	427	416	11	1	2557		6.47	NO					3.1	NO	NO		1.6	YES	YES	111	1.6	YES	1.6	5.48
70824657619	2012	YES	VIH		NO	NO	NO	2012	Woman	F	45	40	NonAIDS	2	2	881.8	881.8	5	158	Other	IPb	2N+1IPb	59	16	59	-16	75		1785	738	1.6	YES						NO										2
70837093532	2012	YES	VIH		YES	NO	NO	2012	MWM	H	51	46	AIDS	4.2	4.25	458.9	458.9	67	2036		INSTI	2N+1II	6	20	91	65	26	6	1953	351	1.83	NO					1.6	YES	YES	360	1.6	YES	YES				1.6	1.6
70904720485	2010	YES	VIH		YES	YES	NO	2010	MWM	H	70	63	NonAIDS	5.89	5.89	71	71	29	879	Simplification	IPb	2N+1IPb	0	0	158	158	0		2897		3.09	NO		1.77	NO
70914669215	2011	YES	VIH		NO	NO	YES	2011	Woman	F	29	23	AIDS	5.09	5.09	170		72	2185	Simplification	IPb	2N+1IPb	0	5	456	451	5	0	2422	210	2.55	NO				339	1.83	NO	NO					330	1.6	YES		1.83
70984188258	2010	YES	VIH		YES	NO	NO	2010	MWM	H	49	42	NonAIDS	3.2	3.2	240.8	240.8	27	818	SIDEFF	IPb	2N+1IPb	10	15	116	91	25		2762					1.6	YES									441	1.3	YES
70991893947	2011	YES	VIH		YES	NO	NO	2011	Woman	F	40	34	NonAIDS	3.95	3.95	201.6	201.6	8	245	Simplification	IPb	2N+1IPb	6	0	160	154	6		2087	232	2	NO		1.6	YES	381	1.6	YES	YES									1.6
70997738063	2010	NO	VIH		NO	NO	NO	2010	MWM	H	36	29	NonAIDS	4.51	4.4	790	520	1	29	SIDEFF	IPb	2N+1IPb	4	1591	1791	196	1595		2536															1000	1.6	YES
70999904811	2011	YES	VIH		YES	YES	NO	2011	MWW	H	52	46	AIDS	4.95	4.95	104.1		35	1066	Simplification	IPb	2N+1IPb	7	4	1385	1374	11	0	2344												1.67	NO	NO		1.6	YES	1.67
70999904814	2012	YES	VIH		NO	NO	NO	2012	MWM	H	62	57	NonAIDS	5.38	5.16	384.2	384.2	10	294	Simplification	IPb	2N+1IPb	24	77	479	378	101		1880	384	3.21	NO	439	1.97	NO			NO			1.6	YES						1.97
70999904816	2012	YES	VIH		NO	NO	NO	2012	MWM	H	45	40	NonAIDS	2.8	3.8	573.8	703.9	24	725		INNTI	2N+1NN	39	1151	1243	53	1190		1855														NO	709			2.81
70999904820	2012	YES	VIH		YES	YES	NO	2012	Woman	F	38	33	NonAIDS	5.3	5.29	109	109	25	750	SIDEFF	IPb	2N+1IPb	34	19	384	331	53		1843
70999904821	2012	YES	VIH		YES	YES	NO	2012	MWM	H	53	48	AIDS	5.5	5.5	69		2	47	SIDEFF	IPb	2N+1IPb	0	28	1309	1281	28	0	1636	69	2.5	NO						YES					YES	200	1.3	YES	1.3	1.3
70999904828	2012	YES	VIH		NO	NO	YES	2012	MWM	H	53	48	NonAIDS	4.5	2.79	510.9	488.2	28	825		INSTI	2N+1II	11	1019	1093	63	1030		1810									NO						599				4.2
70999904829	2012	YES	VIH		NO	NO	NO	2012	MWM	H	52	47	NonAIDS	4.5	4.55	392.9	433.6	7	207	Simplification	IPb	2N+1IPb	9	42	142	91	51		1718				440	1.6	YES		1.6		YES				YES				1.6
70999904830	2012	YES	VIH		YES	NO	NO	2012	MWW	H	74	69	NonAIDS	4.9	4.9	253	253	4	112	SIDEFF	IPb	2N+1IPb	17	0	158	141	17		1747	197	2.73	NO		1.9	NO									251	1.3	YES
70999904838	2013	YES	VIH		NO	NO	NO	2013	MWM	H	27	23	NonAIDS	4.95	4.95	549.9	549.9	1	28	Other	IPb	2N+1IPb	9	14	357	334	23		1763	740	2.52	NO								572	1.6	YES	YES		1.3	YES	1.6
70999904840	2013	YES	VIH		NO	NO	NO	2013	Woman	F	48	45	NonAIDS	2.5	2.5	450	450	31	931	Simplification	IPb	2N+1IPb	29	22	80	29	51		1422	520	1.6	YES											YES	666	1.3	YES	1.3
70999904845	2013	YES	VIH		YES	YES	NO	2013	MWW	H	41	37	NonAIDS	5.2	5.2	23	23	28	841	Simplification	IPb	2N+1IPb	33	0	264	231	33		1723	50	2.5	NO	115	1.4	YES			YES										1.6
70999904847	2013	YES	VIH		YES	YES	NO	2013	Woman	F	28	26	AIDS	5.6	5.57	140	140	8	236	Failure	INSTI	2N+1II	1	25			26	1	865
70999904849	2013	YES	VIH		NO	NO	NO	2013	Woman	F	39	35	NonAIDS	2.2	3.8	1230	1150	3	97	SIDEFF	INNTI	2N+1NN	57	979	1061	25	1036		1694	1230	1.6	YES	1400	1.6	YES
70999904850	2013	YES	VIH		YES	NO	NO	2013	MWW	H	69	65	NonAIDS	6.3	6.3	211	211	15	427	Failure	IPb	2N+1IPb	12	67	1025	946	79		1754	242	3.59	NO	190	2.9	NO			NO		394	4.31	NO	NO				5.18	2.9
70999904852	2013	YES	VIH		NO	NO	NO	2013	Woman	F	30	26	NonAIDS	2.8	2.8	354.9	354.9	36	1078	Simplification	IPb	2N+1IPb	14	11	130	105	25		1735		1.6	YES											YES		1.3	YES	1.6
70999904853	2013	YES	VIH		YES	YES	NO	2013	Woman	F	29	25	NonAIDS	4.4	4.5	95.9	93	54	1644		IPb	2N+1IPb	18	119	353	216	137		1660	129	2.29	NO						NO					YES	298	1.6	YES	1.6	2.29
70999904854	2013	YES	VIH		NO	NO	YES	2013	MWW	H	47	43	NonAIDS	4.7	5	401	401	22	679	Simplification	IPb	2N+1IPb	29	20	757	708	49		1679									YES					YES	697	1.5	YES	1.3	1.3
70999904857	2013	YES	VIH		NO	NO	NO	2013	MWM	H	47	43	NonAIDS	4.3	4.3	375.8	375.8	4	112	Simplification	IPb	2N+1IPb	42	76	269	151	118		1707				486	1.6	YES										1.3	YES
70999904858	2013	YES	VIH		NO	NO	NO	2013	MWM	H	27	23	NonAIDS	5	5	709	709	14	422	Simplification	IPb	2N+1IPb	1	39	145	105	40		1454
70999904864	2013	YES	VIH		YES	NO	NO	2013	MWM	H	70	66	NonAIDS	5.1	5.1	266	220	19	572	Simplification	IPb	2N+1IPb	30	28	453	395	58		1617	330	3.2	NO	350	2.2	NO	350	1.6		YES					381	1.3	YES
70999904865	2013	YES	VIH&HEP	VHC	NO	NO	NO	2013	MWM	H	37	33	NonAIDS	4.2	4.2	500	500	20	586	SIDEFF	IPb	2N+1IPb	13	47	215	155	60		1445	470	2.2	NO								400	1.3	YES		530	1.3	YES
70999904866	2013	YES	VIH		YES	NO	NO	2013	MWM	H	49	45	NonAIDS	4.29	4.29	266	266	15	463	Simplification	IPb	2N+1IPb	11	14	306	281	25		1619					2.25	NO	615	1.6		YES						1.6	YES
70999904867	2013	YES	VIH		YES	YES	NO	2013	MWM	H	52	48	NonAIDS	4.5	4.5	105	170	6	189	SIDEFF	IPb	2N+1IPb	8	21	1411	1382	29		1617	210	2.6	NO	371	1.8	NO	362	1.3		YES
70999904868	2013	YES	VIH		YES	YES	NO	2013	MWM	H	38	34	AIDS	4.5	4.5	221	221	10	308	Simplification	IPb	2N+1IPb	14	7	236	215	21	48	1608		2.54	NO									1.3	YES	YES				1.3
70999904869	2013	YES	VIH		NO	NO	NO	2013	MWM	H	49	45	NonAIDS	2.1	2.1	427.7	427.7	8	245	Simplification	IPb	2N+1IPb	1	19	168	148	20		1553									YES							1.3	YES		1.6
70999904870	2013	YES	VIH		NO	NO	YES	2013	MWM	H	46	42	NonAIDS	3.88	3.88	316.8	316.8	54	1620		INNTI	2N+1NN	26	29	291	236	55		1589
70999904872	2013	YES	VIH		YES	NO	NO	2013	MWW	H	56	53	NonAIDS	6.2	6.2	320	320	5	167	Other	IPb	2N+1IPb	25	38			63		1065														NO				2.9
70999904873	2013	YES	VIH		NO	NO	NO	2013	MWW	H	22	18	NonAIDS	4.9	4.9	390	249	10	293	Simplification	IPb	2N+1IPb	14	70	1159	1075	84		1587	428	3.1	NO				796	2		NO	519	1.3	YES		962	1.3	YES
70999904875	2013	YES	VIH		YES	YES	NO	2013	MWW	H	41	37	AIDS	3.28		15	15	19	567	Simplification	IPb	2N+1IPb	1	11	208	196	12	12	1551	177	2.83	NO	143	1.6	YES			YES		217	1.3	YES	YES	334	1.3	YES	1.3	1.6
70999904876	2013	YES	VIH		NO	NO	YES	2013	MWW	H	31	27	NonAIDS	5.9	5.9	59	59	14	398	Other	IPb	2N+1IPb	33	0	930	897	33		1492															166	2.04	NO
70999904879	2013	YES	VIH		NO	NO	NO	2013	MWM	H	51	47	NonAIDS	4.4	4.4	380	380	7	215	Simplification	IPb	2N+1IPb	13	63	234	158	76		1533	320	1.8	NO	340	1.7	NO					370	1.3	YES	YES				1.3
70999904880	2013	NO	VIH		NO	NO	YES	2013	MWM	H	27	25	NonAIDS	4.7	4.7	720	720	52	1564		IPb	2N+1IPb	11	15	1417	1391	26		664	1010	2.2	NO				1569	1.3		YES					1054	1.3	YES
70999904881	2013	YES	VIH		YES	YES	NO	2013	MWM	H	50	46	AIDS	6.48	6.48	99	99	19	560	Simplification	IPb	2N+1IPb	3	19	1134	1112	22	3	1544	162	3.11	NO		2.37	NO	216	1.88	NO	NO	278	1.72	NO						1.88
70999904882	2013	YES	VIH		NO	NO	NO	2013	MWM	H	55	51	NonAIDS	4.9	4.9	595	595	28	846	SIDEFF	IPb	2N+1IPb	60	49	913	804	109		1554	748	2.4	NO	850	1.9	NO									908	1.3	YES
70999904883	2013	YES	VIH		NO	NO	NO	2013	Woman	F	37	33	NonAIDS	1.6	1.6	508.6	474	2	41		IPb	2N+1IPb	4	1527	0	-1531	1531		1527
70999904884	2013	NO	VIH		NO	NO	NO	2013	MWM	H	27	26	NonAIDS	3.48	3.48	534.7	534.7	6	182	Simplification	IPb	2N+1IPb	2	5	189	182	7		215		1.6	YES	733	1.6	YES			YES										1.6
70999904886	2013	YES	VIH		YES	YES	NO	2013	MWW	H	63	59	AIDS	6.04	6.04	9	9	15	455	Simplification	IPb	2N+1IPb	6	13	363	344	19	11	1462	30	3.68	NO	31	2.41	NO	39	1.88		NO				YES	48	1.3	YES	1.3
70999904887	2013	YES	VIH		NO	NO	NO	2013	Woman	F	33	29	NonAIDS	2.93	2.93	487	681	48	1445		IPb	2N+1IPb	16	108	152	28	124		1364		1.6	YES					1.6		YES
70999904890	2013	YES	VIH		YES	YES	NO	2013	MWM	H	51	48	NonAIDS	6	6	161.9	161.9	51	1525		Other	1NN+1IPb+1II	0	21	1071	1050	21		1071	206	3	NO											NO				1.8
70999904892	2013	YES	VIH		NO	NO	YES	2013	MWM	H	47	44	NonAIDS	5.7	5.46	598.8	380.8	8	264	Simplification	IPb	2N+1IPb	8	13	770	749	21		914					2.18	NO
70999904898	2013	YES	VIH		NO	NO	YES	2013	MWM	H	47	43	NonAIDS	4.8	4.8	799	508.1	4	112	SIDEFF	IPb	2N+1IPb	35	91	300	174	126		1413		2.7	NO				738	1.3		YES
70999904899	2013	NO	VIH		ND	ND	NO	2012	MWW	H	57	56	NonAIDS		5.18		178.9	50	1501		INNTI	2N+1NN	617	0			617		0
70999904901	2011	YES	VIH		ND	ND	NO	2010	MWW	H	37	30	NonAIDS		4.53		689	11	338	SIDEFF	INNTI	2N+1NN	454	131	712	127	585		2164	649	1.92	NO
70999904903	2013	YES	VIH		NO	NO	YES	2013	MWM	H	37	33	NonAIDS	4.2	4.2	427	427	25	746	Simplification	IPb	2N+1IPb	19	17	127	91	36		1458				561	1.6	YES
70999904904	2013	YES	VIH		NO	NO	YES	2013	MWM	H	74	70	NonAIDS	4.9	4.9	478.6	478.6	8	252	Simplification	IPb	2N+1IPb	30	0	178	148	30		1463									YES						695	1.3	YES		1.3
70999904905	2014	YES	VIH		YES	YES	NO	2013	MWM	H	38	34	AIDS	5.25	5.25	35	35	9	264	Simplification	IPb	2N+1IPb	18	9	564	537	27	18	1414		3.5	NO					1.3	YES	YES					163	1.3	YES		1.3
70999904907	2014	YES	VIH		NO	NO	NO	2014	MWM	H	34	31	NonAIDS	3.67	3.67	481	481	4	113	SIDEFF	IPb	2N+1IPb	9	40	335	286	49		1421									YES							1.3	YES		1.3
70999904908	2014	YES	VIH		NO	NO	YES	2014	MWM	H	41	38	NonAIDS	6	6	299	299	7	198	Other	IPb	2N+1IPb	0	2	297	295	2		1347		3.78	NO		3.1	NO			NO							1.83	NO		2.46
70999904910	2014	YES	VIH		NO	NO	YES	2014	MWW	H	37	34	NonAIDS	5.4	5.4	365		1	18	Other	IPb	2N+1IPb	6	0	359	353	6		1362							690	1.7	NO	NO	600	1.3	YES	YES				1.3	1.7
70999904911	2014	YES	VIH		NO	NO	NO	2014	Woman	F	35	32	NonAIDS	4.8	4.8	419	419	8	237	Simplification	IPb	2N+1IPb	15	0	196	181	15		1327					1.71	NO									1070
70999904912	2014	YES	VIH		YES	YES	NO	2014	Woman	F	40	37	AIDS	5.19	5.19	30	3	1	25	Other	INSTI	2N+1II	20	31	252	201	51	58	1325	72	1.99	NO	75	1.6	YES
70999904914	2014	YES	VIH		NO	NO	NO	2014	MWM	H	42	39	NonAIDS	3.5	3.5	646	646	1	28	SIDEFF	INNTI	2N+1NN	10	26	669	633	36		1328
70999904920	2014	YES	VIH		NO	NO	NO	2014	MWM	H	54	51	NonAIDS	1.6	1.34	420.8	331	35	1061		INNTI	2N+1NN	30	332	405	43	362		1352
70999904921	2014	YES	VIH		NO	NO	YES	2014	MWM	H	37	34	NonAIDS	4.8	4.74	573.2	573.2	5	175	Simplification	IPb	2N+1IPb	23	14	743	706	37		1365	421	2.49	NO	532	1.76	NO								YES		1.91	NO	1.3
70999904923	2014	YES	VIH&HEP	VHB	NO	NO	NO	2014	MWM	H	35	32	NonAIDS	4.1	4.1	366	366	10	315	Simplification	IPb	2N+1IPb	25	3	63	35	28		1247					1.3	YES			YES										1.6
70999904924	2014	YES	VIH		NO	NO	YES	2014	MWM	H	26	23	NonAIDS	3.95	3.95	644.2	644.2	4	119	Simplification	IPb	2N+1IPb	20	19	244	205	39		1331
70999904925	2014	YES	VIH		YES	NO	NO	2014	MWM	H	27	24	NonAIDS	6.58	5.33	330	330	3	90	Simplification	IPb	2N+1IPb	5	19	438	414	24		1085					2.52	NO		1.3		YES
70999904929	2014	YES	VIH		YES	YES	NO	2014	Woman	F	45	42	AIDS	5.6	5.19	62	62	14	433	SIDEFF	IPb	2N+1IPb	11	7	248	230	18	11	1142		2.86	NO
70999904933	2014	YES	VIH		ND	ND	NO	2013	MWM	H	33	29	NonAIDS		3.6		360	25	763	Simplification	IPb	2N+1IPb	230	30	351	91	260		1199				600	1.3	YES					680	1.3	YES	YES	670	1.6	YES	1.3
70999904934	2014	YES	VIH		NO	NO	YES	2014	MWM	H	26	23	NonAIDS	5	5	389.9	389.9	3	106	Simplification	IPb	2N+1IPb	4	1	111	106	5		1236
70999904939	2014	YES	VIH		YES	NO	NO	2014	MWM	H	49	46	NonAIDS	5.05	5.05	247	247	8	230	Simplification	IPb	2N+1IPb	11	27	402	364	38		1158	364	2.85	NO						NO		427								2.29
70999904940	2014	YES	VIH		NO	NO	NO	2014	Woman	F	33	30	NonAIDS	1.49	1.49	393	393	3	107	Other	Other	1IPb	58	12	111	41	70		1175																1.3	YES
70999904941	2014	YES	VIH		NO	NO	YES	2014	MWM	H	51	48	NonAIDS	6.9	6.9	258.8	258.8	6	183	SIDEFF	IPb	2N+1IPb	4	0	169	165	4		1212		3.43	NO				768	1.3	YES	YES									1.3
70999904942	2014	YES	VIH		YES	YES	NO	2014	MWW	H	53	50	NonAIDS	5.41	5.39	77	77	11	350	Simplification	IPb	2N+1IPb	7	34	560	519	41		1184	126	3.05	NO						YES			1.3	YES						1.3
70999904943	2014	YES	VIH		YES	YES	NO	2014	MWM	H	50	47	NonAIDS	5.4	5.4	10	10	14	412	Failure	IPb	2N+1IPb	1	6	709	702	7		1196	70	3.4	NO				110	1.8		NO	190	1.7	NO	NO	220	1.6	YES	1.7
70999904944	2014	YES	VIH		YES	YES	NO	2014	MWW	H	45	42	AIDS	4.8	4.8	10	10	5	152	Simplification	IPb	2N+1IPb	1	22	141	118	23	0	1210														YES				1.3
70999904947	2014	YES	VIH		NO	NO	YES	2014	MWM	H	35	32	NonAIDS	5.7	5.7	717.8	717.8	30	922	Other	INSTI	2N+1II	7	21	164	136	28		1148		1.86	NO					1.3		YES
70999904948	2014	YES	VIH		NO	NO	NO	2014	MWM	H	53	52	NonAIDS	4.04	4.04	444	444	40	1217		INSTI	2N+1II	12	21	260	227	33		470									YES										1.3
70999904959	2014	NO	VIH&HEP	VHC	ND	ND	NO	2012	MWW	H	30	25	NonAIDS		3.5		575.1	5	154	Other	IPb	2N+1IPb	766	16	888	106	782		1218								1.3		YES
70999904962	2014	NO	VIH		NO	NO	NO	2014	Woman	F	29	26	NonAIDS	3.9	4.4	455.6	288.4	10	282	Simplification	IPb	2N+1IPb	1	348	661	312	349		845
70999904963	2014	NO	VIH		NO	NO	YES	2013	MWM	H	23	22	NonAIDS					45	1350		IPb	2N+1IPb	372	0			372		168
70999904965	2014	YES	VIH		ND	ND	NO	2013	Woman	F	39	35	NonAIDS		4.98		402.1	36	1077		IPb	2N+1IPb	541	43	1087	503	584		1100
70999904967	2014	YES	VIH		YES	YES	NO	2014	MWM	H	38	35	AIDS	5.1	5.1	212	212	3	90	Intensification	IPb	2N+1IPb	13	0	170	157	13	13	1036		2.84	NO				274	1.34	YES	YES									1.3
70999904968	2014	YES	VIH		YES	YES	NO	2014	MWW	H	18	15	NonAIDS	4.6	4.6	141	164.1	36	1084		INSTI	2N+1II	13	26	152	113	39		1048	179	4.51	NO					1.3		YES					220	1.3	YES
70999904971	2014	YES	VIH		NO	NO	NO	2014	Woman	F	58	55	NonAIDS	5	4.7	1153	932.3	4	126	Simplification	IPb	2N+1IPb	7	66	303	230	73		1017		3.11	NO		1.93	NO						1.3	YES
70999904972	2015	YES	VIH		NO	NO	NO	2015	Woman	F	24	22	NonAIDS	4.8	4.8	646	646	9	266	SIDEFF	IPb	2N+1IPb	12	22	279	245	34		967	660	3	NO	620	2.3	NO			YES					YES				1.6	1.3
70999904977	2015	YES	VIH		NO	NO	NO	2015	MWW	H	28	26	NonAIDS	4.7	4.7	415	415	7	215	Simplification	IPb	2N+1IPb	15	64	140	61	79		945							910	1.3		YES
70999904979	2015	NO	VIH		ND	ND	NO	2015	MWM	H	24	24	NonAIDS	5.3	5.3			34	1025		IPb	2N+1IPb	38	28			66		158		2.62	NO		2.16	NO
70999904980	2015	YES	VIH		ND	ND	NO	2014	MWM	H	30	28	NonAIDS		3.42		475.3	1	43	SIDEFF	INSTI	2N+1II	181	21			202		449									NO										3.42
70999904983	2015	YES	VIH		NO	NO	NO	2014	Woman	F	50	47	NonAIDS			392	321.4	1	42	SIDEFF	INSTI	2N+1II	94	0	136	42	94		1007
70999904987	2015	YES	VIH		ND	ND	NO	2014	Woman	F	31	28	NonAIDS		4.3		610	8	232	SIDEFF	IPb	2N+1IPb	299	71	590	220	370		651	554	1.9	NO								860	1.6	YES
70999904992	2015	NO	VIH		YES	YES	NO	2015	MWM	H	29	28	AIDS	5.18	5.18	13	13	0	4	SIDEFF	IPb	2N+1IPb	14	14	210	182	28	14	266	35	3.95	NO				118	1.3		YES
70999905001	2015	YES	VIH&HEP	VHC&VHB	YES	YES	NO	2015	MWW	H	71	69	AIDS	5.9	5.8	140	140	0	10	SIDEFF	IPb	2N+1IPb	25	37			62	73	759							310	1.7		NO
70999905002	2015	YES	VIH		NO	NO	YES	2015	MWM	H	51	49	NonAIDS	6.82	6.96	516.9	654.9	12	387	Simplification	IPb	2N+1IPb	11	28	426	387	39		925		3.38	NO						YES										1.3
70999905004	2015	NO	VIH		NO	NO	NO	2015	MWW	H	68	66	NonAIDS	5.49	5.49	390	390	20	603	SIDEFF	IPb	2N+1IPb	10	20	577	547	30		910				552	2.92	NO										1.3	YES
70999905008	2015	YES	VIH		YES	NO	NO	2015	MWW	H	44	42	NonAIDS	5.7	5.7	217	217	17	504	SIDEFF	IPb	2N+1IPb	42	5	609	562	47		783	250	3.3	NO												580	1.6	YES
70999905011	2015	YES	VIH		YES	NO	NO	2015	Woman	F	52	50	NonAIDS	4.7	4.7	250	250	27	810		IPb	2N+1IPb	19	49	726	658	68		764	240	2.6	NO						YES		280	1.6	YES						1.6
70999905015	2015	YES	VIH		ND	ND	NO	2015	Woman	F	36	34	NonAIDS	4.9	4.9			26	790		IPb	2N+1IPb	8	55			63		530	108	3.4	NO								180	2.4	NO	NO				2.7
70999905018	2015	YES	VIH		NO	NO	YES	2015	MWM	H	30	28	NonAIDS	5.4	5.4	820	820	2	57	Other	IPb	2N+1IPb	8	0	98	90	8		701	1210	2.2	NO	1270	1.6	YES
70999905020	2014	YES	VIH		YES	YES	NO	2014	MWW	H	49	47	AIDS	5.5	5.5	60	60	38	1157		IPb	2N+1IPb	0	8			8	0	558	170	4.3	NO	230	3.2	NO	288	2.5	NO	NO									2.5
70999905022	2014	YES	VIH		NO	NO	YES	2014	MWM	H	34	32	NonAIDS		3.1		1607.2	27	796		INNTI	2N+1NN	12	441			453		867														NO				3.1
70999905026	2015	YES	VIH		NO	NO	NO	2015	MWW	H	59	57	NonAIDS	4.77	4.8	362.9	404	12	378	Failure	IPb	2N+1IPb	7	19	422	396	26		782		2.4	NO					2		NO		2.1	NO	NO		1.6	YES	2.1
70999905029	2014	YES	VIH		YES	NO	NO	2014	MWM	H	25	23	NonAIDS	3.5	3.5	337	337	17	507	SIDEFF	INSTI	2N+1II	33	42	533	458	75		703							499	1.3		YES					510	1.6	YES
70999905037	2015	NO	VIH		YES	NO	NO	2015	Woman	F	32	31	NonAIDS	4.2	4.2	310	310	0	3	Other	IPb	2N+1IPb	5	86			91		112							290	4.5		NO
70999905039	2015	YES	VIH		YES	NO	NO	2015	Woman	F	40	38	NonAIDS	5.3	5.3	260.3	260.3	22	650		IPb	2N+1IPb	36	98	421	287	134		713	349	3.4	NO	348	2.3	NO			NO										3.4
70999905041	2015	YES	VIH		YES	YES	NO	2015	Woman	F	64	62	AIDS	5.6	5.6	130	130	22	670	Simplification	INSTI	2N+1II	19	2	265	244	21	27	723	190	2.1	NO	390	1.7	NO			YES		390	1.6	YES	YES				1.6	1.6
70999905042	2015	YES	VIH		NO	NO	NO	2015	MWM	H	34	32	NonAIDS	3.3	3.5	417	498.9	5	144	SIDEFF	INSTI	2N+1II	0	21	49	28	21		543					1.3	YES
70999905050	2016	YES	VIH		ND	ND	NO	2015	Woman	F	23	21	NonAIDS	4.1	4.1			0	0	Other	INSTI	2N+1II	49	11	528	468	60		584
70999905055	2015	YES	VIH		YES	YES	NO	2015	Woman	F	36	34	NonAIDS	5.3	5.3	150	150	7	230	Simplification	IPb	2N+1IPb	9	23	480	448	32		925							290	1.6		YES
70999905060	2014	YES	VIH		NO	NO	NO	2014	MWM	H	30	28	NonAIDS	4.6	4.9	553	503	43	1287		INSTI	2N+1II	24	12	154	118	36		887	867	2	NO				942	1.5		YES					790	1.6	YES
70999905068	2016	YES	VIH&HEP	VHB	ND	ND	NO	2013	Woman	F	42	38	AIDS		5.2		265.5	17	488		IPb	2N+1IPb	1032	141	1346	173	1173	1558	616		3.2	NO				402	1.6		YES
70999905170	2015	YES	VIH&HEP	VHB	YES	NO	NO	2015	Woman	F	35	33	NonAIDS			240		12	373	Other	INSTI	2N+1II	11	10	107	86	21		582					1.7	NO		1.7		NO					245
70999905178	2017	NO	VIH		NO	NO	NO	2010	MWW	H	56	49	NonAIDS	4.2	4.6	790	830	6	183		IPb	2N+1IPb	2574	52			2626		49
70999905219	2013	YES	VIH		NO	NO	YES	2012	MWM	H	27	22	NonAIDS					0	7	SIDEFF	IPb	2N+1IPb	48	0			48		1734
70999905223	2012	YES	VIH		YES	YES	NO	2012	Woman	F	43	38	AIDS					15	452	Failure	IPb	2N+1IPb	12	37			49	71	1765
70999905232	2013	YES	VIH		ND	ND	NO	2013	MWW	H	29	25	NonAIDS					22	672	Other	INNTI	2N+1NN	154	187			341		1560
70999905236	2015	YES	VIH		ND	ND	NO	2015	MWM	H	30	28	NonAIDS					7	215	Simplification	INSTI	2N+1II	12	23			35		744
70999905240	2011	YES	VIH		ND	ND	NO	2011	MWW	H	40	34	NonAIDS					24	729	Other	INSTI	2N+1II	148	1454			1602		2231
70999905241	2009	NO	VIH		YES	YES	NO	2010	MWW	H	46	39	AIDS					2	45		IPb	2N+1IPb	167	2545			2712	16	2559
70999905262	2017	NO	VIH		ND	ND	NO	2015	Woman	F	32	30	NonAIDS					0	-2		IPb	2N+1IPb	918	15			933		0
80004436672	2011	YES	VIH		YES	YES	NO	2011	MWM	H	50	44	AIDS	6.43	6.43	115.3	115.3	7	214	SIDEFF	IPb	2N+1IPb	20	8	220	192	28	41	2276					2.61	NO		1.6		YES
80009790361	2012	NO	VIH		NO	NO	NO	2012	Woman	F	24	23	NonAIDS	4.81	4.81	563.4	563.4	60	1813		IPb	2N+1IPb	7	47			54		183
80012691677	2011	YES	VIH		NO	NO	YES	2011	Woman	F	56	50	NonAIDS	4.92	4.92	369.5	370.5	6	200	Simplification	IPb	2N+1IPb	32	9	131	90	41		2043					1.3	YES		1.6		YES				YES				1.3
80015950501	2010	YES	VIH		NO	NO	NO	2010	Woman	F	34	27	AIDS	4.38	4.4	362.9	237.1	0	20	Other	INNTI	2N+1NN	78	470	2008	1460	548	2406	2561									NO										4.5
80022365749	2012	YES	VIH		YES	NO	NO	2012	Woman	F	55	50	NonAIDS	4.52	4.52	324.3	324.3	8	230	Simplification	INNTI	2N+1NN	18	15	243	210	33		1941					1.3	YES								YES				1.4
80025737942	2010	YES	VIH		NO	NO	NO	2010	MWM	H	26	19	NonAIDS	3.15	3.5	411.2	565.7	34	1008		INNTI	2N+1NN	13	1698	2301	590	1711		2489
80026455105	2011	YES	VIH&HEP	VHC	YES	YES	NO	2011	MWM	H	51	45	AIDS	4.96	4.96	13.1	13.1	6	180	SIDEFF	IPb	2N+1IPb	67	12	314	235	79	67	2289		2.77	NO						YES					YES		1.6	YES	1.3	1.32
80038112820	2013	YES	VIH		NO	NO	NO	2013	Woman	F	35	31	NonAIDS	1.99	3.1	789.3	1134.4	45	1348		INNTI	2N+1NN	25	380	437	32	405		1576		1.6	YES						NO					NO				3.1	2.4
80052266419	2011	NO	VIH		YES	YES	NO	2011	MWW	H	47	41	NonAIDS	4.77	4.77	147.3	147.3	42	1279	Simplification	IPb	2N+1IPb	39	22	1305	1244	61		1955
80058696926	2012	YES	VIH		YES	NO	NO	2012	MWM	H	38	33	NonAIDS	5.25	5.25	219.5	219.5	4	147	Simplification	INNTI	2N+1NN	28	48	712	636	76		1873		3.19	NO
80089458645	2010	YES	VIH&HEP	VHC&VHB	YES	YES	NO	2010	Woman	F	72	65	AIDS	6.57	6.57	51.8	51.8	6	201	SIDEFF	IPb	2N+1IPb	16	23	1484	1445	39	15	2617					3.8	NO		2.74	NO	NO				NO				3.07	2.8
80090038479	2011	YES	VIH		NO	NO	NO	2011	Woman	F	34	31	NonAIDS	3.24	3.45	376.5	421.3	72	2182		IPb	2N+1IPb	18	155	193	20	173		926								1.3	YES	YES									1.3
80090840638	2012	NO	VIH&HEP	VHB	YES	NO	NO	2012	MWM	H	24	21	NonAIDS	4.55	4.55	312	312	1	42	SIDEFF	IPb	2N+1IPb	35	91	595	469	126		1228									NO										4.51
80091558338	2012	NO	VIH		NO	NO	NO	2012	MWM	H	24	19	NonAIDS	5	5	547.5	547.5	2	59	Other	INNTI	2N+1NN	41	76	800	683	117		1646																3.8	NO
80103405238	2011	YES	VIH		YES	YES	NO	2011	MWW	H	68	62	NonAIDS	5.24	5.24	122.4	122.4	1	36	Other	IPb	2N+1IPb	19	23	361	319	42		2305								1.83		NO				YES				1.6
80109199644	2012	YES	VIH		ND	ND	NO	2012	MWM	H	32	30	NonAIDS					64	1942		IPb	2N+1IPb	13	63	359	283	76		684														YES				1.3
80117748440	2012	NO	VIH		ND	ND	NO	2011	MWW	H	40	39	NonAIDS		4.33		327.8	68	2071		IPb	2N+1IPb	135	64			199		260
80121654690	2012	YES	VIH		NO	NO	YES	2012	MWM	H	40	35	NonAIDS	4.35	4.35	420.3	420.3	37	1132	Simplification	IPb	2N+1IPb	38	15	87	34	53		2008		1.6	YES	659	1.3	YES								YES		1.3	YES	1.6
80126568020	2012	YES	VIH		NO	NO	NO	2012	MWM	H	34	29	NonAIDS	5.08	5.08	480.8	543.7	3	104	Simplification	INNTI	2N+1NN	6	28	211	177	34		1678		2.16	NO		1.3	YES		1.3		YES
80130367458	2012	YES	VIH		YES	YES	NO	2012	MWW	H	67	62	NonAIDS	5.24	5.24	60.7	60.7	30	888	Other	IPb	2N+1IPb	7	15	314	292	22		2100		3.03	NO													1.3	YES
80133098781	2011	YES	VIH		YES	YES	NO	2011	Woman	F	59	53	AIDS	5.1	5.1	20.2	31.4	14	405	Other	IPb	2N+1IPb	20	20	187	147	40	35	2359		3.13	NO						YES							1.3	YES		1.3
80134182155	2012	NO	VIH		ND	ND	NO	2012	MWW	H	44	39	AIDS		4.7		2	14	401	Simplification	IPb	2N+1IPb	48	823	1166	295	871	841	2091
80147359193	2010	YES	VIH		NO	NO	NO	2010	MWM	H	30	26	NonAIDS	3.93	3.93	350.5	350.5	32	988	Simplification	IPb	2N+1IPb	11	38	229	180	49		1219								1.3		YES	1108	1.3	YES			1.3	YES
80151775539	2011	YES	VIH		YES	YES	NO	2011	MWW	H	48	42	AIDS	5.46	5.46	13.3	13.3	1	24	Other	Other	1N+1IPb	15	17			32	17	2377					3.62	NO		2.51	NO	NO									2.34
80157360256	2010	NO	VIH		YES	YES	NO	2010	MWW	H	47	42	AIDS			152.8	152.8	1	29	Other	IPb	2N+1IPb	8	8			16	6	1676
80157552064	2012	NO	VIH		ND	ND	NO	2011	Woman	F	44	42	NonAIDS		4.53		414.9	69	2099		IPb	2N+1IPb	139	70	294	85	209		350					1.3	YES
80159816921	2011	YES	VIH		YES	YES	NO	2010	MWM	H	41	34	NonAIDS	4.46	4.32	186.1	407.5	2	56	SIDEFF	IPb	2N+1IPb	81	273	697	343	354		2462
80166378200	2013	NO	VIH		NO	NO	NO	2013	MWW	H	37	33	NonAIDS	4.46	4.46	618.8	618.8	46	1414	Other	IPb	2N+1IPb	0	19			19		1539
80168616712	2011	NO	VIH		ND	ND	NO	2011	MWW	H	52	46	AIDS					2	46	Other	IPb	2N+1IPb	69	15	2198	2114	84	1888	2340
80169682801	2011	YES	VIH		NO	NO	NO	2011	Woman	F	22	16	NonAIDS	6.36	6.36	436.5	436.5	36	1099	Simplification	IPb	2N+1IPb	13	41	730	676	54		2440									NO							1.72	NO		2.34
80176037014	2013	YES	VIH		YES	NO	NO	2013	MWW	H	56	52	NonAIDS	4.4	4.4	272.9	272.9	56	1704		INNTI	2N+1NN	55	17	245	173	72		1686				415	1.7	NO	416	1.3		YES						1.3	YES
80176067531	2012	YES	VIH		YES	YES	NO	2012	MWW	H	37	32	NonAIDS	7.37	7.37	3	3	20	599	Simplification	IPb	2N+1IPb	7	18	210	185	25		1705					1.57	YES		1.6		YES						1.3	YES
80181087673	2013	NO	VIH&HEP	VHC	YES	NO	NO	2013	Woman	F	48	44	NonAIDS	5.1	5.1	224.3	224.3	10	302	Other	Other	1N+1IPb	8	14	221	199	22		1694		3.3	NO
80186940492	2010	YES	VIH		ND	ND	NO	2010	Woman	F	33	26	AIDS		5.2		220.2	11	316	Other	IPb	2N+1IPb	131	224	488	133	355	1072	2631														NO				5.2
80189689100	2012	NO	VIH		NO	NO	NO	2012	MWM	H	29	24	NonAIDS	4.95	4.95	524.8	524.8	1	29	SIDEFF	IPb	2N+1IPb	29	43	1900	1828	72		2040
80190334499	2011	YES	VIH		YES	NO	NO	2011	Woman	F	39	33	NonAIDS	3.23		311.7		40	1240	Intensification	IPb	2N+1IPb	2	7	156	147	9		2269		3.23	NO		1.86	NO								YES				1.6
80191428781	2012	YES	VIH		NO	NO	NO	2012	MWW	H	51	46	NonAIDS	4.07	4	600.5	614.3	42	1293	Other	INNTI	2N+1NN	22	303	417	92	325		1806														NO				2
80201793850	2012	YES	VIH		YES	YES	NO	2012	MWM	H	53	48	AIDS	4.88	4.88	181.6	181.6	29	873	Simplification	IPb	2N+1IPb	1	15	279	263	16	5	1881		2.37	NO													1.3	YES
80206112087	2012	YES	VIH		ND	ND	NO	2011	MWM	H	43	37	NonAIDS	4.79	4.66		342.6	2	50	SIDEFF	IPb	2N+1IPb	48	462	1065	555	510		2145		3.7	NO												292	1.3	YES
80209179104	2011	NO	VIH		YES	YES	NO	2011	MWM	H	40	39	NonAIDS	5.63	5.63	113.8	113.8	77	2360	Simplification	INNTI	2N+1NN	24	23			47		151		2.97	NO		1.83	NO
80218776882	2012	YES	VIH&HEP	VHB	NO	NO	YES	2012	MWW	H	55	50	NonAIDS	8.73	8.73	233.8	233.8	3	101	Simplification	INNTI	2N+1NN	8	12	379	359	20		1763		3.37	NO		2.53	NO		1.73	NO	NO		1.3	YES	YES				1.3	1.73
80224128366	2011	YES	VIH		YES	NO	NO	2011	Woman	F	53	47	NonAIDS	3.95	3.95	284.7	284.7	5	136	Other	IPb	2N+1IPb	65	31	229	133	96		2084																1.3	YES
80227367580	2011	YES	VIH		NO	NO	NO	2011	Woman	F	53	49	NonAIDS	4.89	4.89	604.1	604.1	75	2278		IPb	2N+1IPb	12	65	166	89	77		1406					1.6	YES			YES			1.6	YES						1.6
80229641140	2012	YES	VIH		YES	NO	NO	2012	Woman	F	33	32	NonAIDS	4.18	4.18	273.9	273.9	65	1958		IPb	2N+1IPb	12	121	405	272	133		382	213	4.37	NO
80230678797	2011	YES	VIH		ND	ND	NO	2010	Woman	F	52	49	NonAIDS		4.21		239.2	75	2266		IPb	2N+1IPb	298	47	408	63	345		497
80244283021	2012	YES	VIH&HEP	VHC	YES	YES	NO	2012	Woman	F	57	52	NonAIDS	5.82	5.82	26.1	26.1	22	647	Simplification	IPb	2N+1IPb	11	14	503	478	25		1725		3.61	NO													1.3	YES
80248073757	2013	YES	VIH		YES	NO	NO	2013	Woman	F	69	65	NonAIDS	4.7	4.7	208.8	208.8	57	1729		INNTI	2N+1NN	0	34	339	305	34		1711		2.6	NO		2.1	NO			NO							1.6	YES		2
80252631068	2012	YES	VIH		YES	YES	NO	2012	Woman	F	48	46	NonAIDS	4.85	4.85	22.7	22.7	61	1849		IPb	2N+1IPb	16	27	234	191	43		554							133	1.3	NO	YES									2.5
80253135145	2010	YES	VIH		NO	NO	NO	2010	MWW	H	46	39	NonAIDS	4.99	4.99	482.8	482.8	47	1434	Simplification	INNTI	2N+1NN	4	46	423	373	50		2672				263	5.03	NO			NO			1.3	YES						3.36
80253856838	2012	YES	VIH		YES	YES	NO	2012	MWW	H	56	51	NonAIDS	5.51	5.51	30.6	30.6	29	886	Other	IPb	2N+1IPb	3	10	303	290	13		2066		3.67	NO
80255195260	2012	YES	VIH		NO	NO	NO	2010	Woman	F	41	34	NonAIDS	3.07	3.55	464.5	322.7	60	1813	Other	INNTI	2N+1NN	587	399	1258	272	986		2058									NO										2.99
80255916775	2013	NO	VIH		NO	NO	NO	2013	MWW	H	73	70	NonAIDS	2.5	2.5	527.3	527.3	59	1768		INNTI	2N+1NN	26	23			49		1394
80266567409	2010	YES	VIH&HEP	VHB	NO	NO	NO	2010	Woman	F	58	51	NonAIDS	4.37	4.23	707.5	629.1	67	2048	Simplification	IPb	2N+1IPb	32	220	332	80	252		2535					1.3	YES
80272684634	2012	YES	VIH		YES	YES	NO	2012	Woman	F	20	16	AIDS	5.56	5.56	42.3	42.3	8	248	SIDEFF	IPb	2N+1IPb	0	17			17	0	1371		2.79	NO						NO					NO	213	3	NO	4.8	3.31
80282726467	2012	YES	VIH		YES	NO	NO	2012	MWW	H	35	30	NonAIDS	4.25	4.52	227	255.5	34	1034	Simplification	IPb	2N+1IPb	15	69	289	205	84		1659												1.6	YES
80287273586	2012	YES	VIH		NO	NO	NO	2012	MWM	H	29	25	NonAIDS	4.68	4.27	504	741.1	6	160	Other	INNTI	2N+1NN	20	321	1541	1200	341		1659														NO	779	1.9	NO	4.46
80291637659	2012	YES	VIH		NO	NO	NO	2012	MWW	H	77	72	NonAIDS	4.71	4.71	411.2	411.2	21	633	SIDEFF	INNTI	2N+1NN	11	39	223	173	50		1822				341	1.76	NO
80292869032	2011	NO	VIH		NO	NO	NO	2011	MWW	H	36	36	NonAIDS	4.98	4.98	480.2	480.2	80	2427		IPb	2N+1IPb	16	35			51		114
80294927478	2012	NO	VIH		ND	ND	NO	2011	MWM	H	40	38	NonAIDS		5.3		84.9	62	1862		IPb	2N+1IPb	368	132			500		174
80294944406	2010	YES	VIH		YES	NO	NO	2010	MWM	H	25	23	NonAIDS	3.96	2.79	300.6	402.4	5	159	Simplification	INNTI	2N+1NN	27	457	629	145	484		617
80295528591	2010	YES	VIH		YES	YES	NO	2010	MWW	H	46	45	NonAIDS	5.53	5.53	39.4	39.4	93	2805		IPb	2N+1IPb	7	30	360	323	37		480														YES		1.49	YES	1.3
80300498426	2011	YES	VIH		YES	YES	NO	2011	MWM	H	47	45	NonAIDS	4.87	4.87	101.7	101.7	73	2203		IPb	2N+1IPb	58	28			86		464
80309978962	2011	YES	VIH&HEP	VHC	NO	NO	NO	2011	MWW	H	55	49	NonAIDS	4.13	4.12	397.9	446.4	7	215	SIDEFF	INNTI	2N+1NN	16	1983	2189	190	1999		2240		1.3	YES					1.3		YES
80327245057	2010	YES	VIH		NO	NO	NO	2010	MWM	H	42	35	NonAIDS	4.97	4.34	416.8	318.4	2	59	Simplification	INNTI	2N+1NN	14	198	537	325	212		2568					1.63	NO		1.43	NO	YES									4.34
80349575222	2010	YES	VIH		YES	YES	NO	2010	MWW	H	43	36	NonAIDS	4.92	4.92	172	172	0	20	SIDEFF	IPb	2N+1IPb	16	13	198	169	29		2526								1.3		YES
80351413548	2010	YES	VIH		NO	NO	NO	2010	MWW	H	28	21	NonAIDS	3.09	3.57	442	450.8	18	534	Simplification	IPb	2N+1IPb	14	494	823	315	508		2736									NO										3.12
80352481663	2011	YES	VIH		YES	YES	NO	2011	MWW	H	37	31	AIDS	5.56	5.63	17	0.8	6	185	SIDEFF	IPb	2N+1IPb	22	5	2275	2248	27	17	2295		4.19	NO									3.48	NO
80354382038	2012	NO	VIH		ND	ND	NO	2011	MWM	H	29	23	NonAIDS		5.45		306	26	782	SIDEFF	IPb	2N+1IPb	152	90	490	248	242		2079															354	1.3	YES
80365882516	2010	YES	VIH		NO	NO	NO	2010	MWM	H	28	21	NonAIDS	4.15	4.5	397.6	352.3	45	1364		INNTI	2N+1NN	53	1212	1398	133	1265		2478
80369381130	2010	YES	VIH		YES	NO	NO	2010	Woman	F	26	22	NonAIDS			297.4	297.4	30	904	Other	INNTI	2N+1NN	20	37	231	174	57		1521					1.3	YES		1.3		YES				YES				1.3
80369410098	2013	NO	VIH		NO	NO	NO	2012	MWM	H	22	21	NonAIDS	4.77	4.77	445.1	445.1	60	1797		IPb	2N+1IPb	19	23			42		135		2.6	NO	330	2.1	NO
80369915247	2010	YES	VIH		YES	YES	NO	2011	Woman	F	71	65	NonAIDS	4.26	1.3	178.8	494.6	30	890	Simplification	IPb	2N+1IPb	47	245	251	-41	292		2304																1.3	YES
80370845974	2011	YES	VIH		YES	YES	NO	2011	Woman	F	37	31	NonAIDS	4.66	4.66	194.7	194.7	5	166	Other	IPb	2N+1IPb	21	25	946	900	46		2076	284	2.64	NO		1.89	NO
80372234821	2012	NO	VIH		NO	NO	NO	2012	Woman	F	31	26	NonAIDS	4.79	4.79	455.5	455.5	1	49	SIDEFF	IPb	2N+1IPb	19	66	1910	1825	85		2088									YES										1.45
80372570217	2011	YES	VIH		NO	NO	NO	2011	MWW	H	60	54	NonAIDS	4.51	3.5	943.1	1241.6	1	21		IPb	2N+1IPb	8	2321			2329		2321														NO				3.43
80375927150	2010	NO	VIH		YES	YES	NO	2010	Woman	F	52	51	NonAIDS	5.65	5.65	168.1	168.1	2	61	SIDEFF	IPb	2N+1IPb	15	22			37		302
80378612697	2011	YES	VIH&HEP	VHB	YES	YES	NO	2011	Woman	F	57	51	AIDS	3.16		16.6	16.6	33	1000	Simplification	INSTI	2N+1II	27	22	193	144	49	27	2371					1.4	YES		1.3	YES	YES						1.3	YES		1.3
80378882110	2011	YES	VIH		NO	NO	NO	2011	Woman	F	27	26	NonAIDS	4.35	4.22	439.4	484.5	0	12	Other	IPb	2N+1IPb	14	218			232		462
80386847198	2012	YES	VIH		YES	YES	NO	2012	MWW	H	58	53	NonAIDS	5.52	5.52	20.6	20.6	43	1308	Simplification	IPb	2N+1IPb	15	35	668	618	50		1973									NO					NO	270	1.4	YES	1.65	2.66
80387096882	2011	YES	VIH		YES	YES	NO	2011	Woman	F	46	40	AIDS	5.31	5.38	72.8	79.2	45	1358	Simplification	IPb	2N+1IPb	8	96	495	391	104	85	2308								5.78		NO				NO				2.84
80387966633	2011	NO	VIH		YES	YES	NO	2011	MWM	H	61	55	AIDS	5.17	5.17	10.4	9.3	77	2361		IPb	2N+1IPb	9	26	234	199	35	9	2466		3.33	NO
80389930189	2012	YES	VIH		NO	NO	NO	2012	Woman	F	28	23	NonAIDS	3.59	3.59	430.3	358.6	45	1367	Other	IPb	2N+1IPb	21	150	252	81	171		2001		2.22	NO		1.3	YES
80396918714	2012	NO	VIH		ND	ND	NO	2011	MWM	H	23	21	NonAIDS		3.17		292.7	3	84	SIDEFF	IPb	2N+1IPb	347	42	485	96	389		294		1.96	NO		1.3	YES								NO				3.17
80399929226	2011	YES	VIH		NO	NO	NO	2010	MWM	H	30	28	NonAIDS	5.49	5.06	416.7	435.7	71	2161		IPb	2N+1IPb	34	391			425		573
80407865882	2012	NO	VIH		ND	ND	NO	2012	MWM	H	21	20	NonAIDS		3.75		430.9	60	1805		IPb	2N+1IPb	108	174			282		202
80409527004	2010	YES	VIH		YES	YES	NO	2010	MWW	H	65	58	NonAIDS	5.46	5.46	134.1	134.1	47	1439	Simplification	IPb	2N+1IPb	12	53	694	629	65		2604								1.65	NO	NO				YES				1.34	1.93
80410105288	2010	YES	VIH		YES	NO	NO	2010	MWM	H	57	50	NonAIDS	2.2	2.2	294.6	193.4	5	160	SIDEFF	INNTI	2N+1NN	19	35	80	26	54		2786		1.3	YES						YES					YES				1.3	1.3
80411464870	2013	YES	VIH&HEP	VHB	NO	NO	NO	2013	MWW	H	43	39	NonAIDS	4.26	4.26	400.2	400.2	30	905	SIDEFF	INNTI	2N+1NN	6	38	125	81	44		1772					1.3	YES	661	1.3		YES
80423101306	2011	NO	VIH		NO	NO	NO	2011	MWW	H	75	69	AIDS	1.99	1.3	684.9	851.6	21	629	Other	INSTI	2N+1II	11	1022	898	-135	1033	1010	2239
80440227687	2010	YES	VIH		YES	YES	NO	2010	MWW	H	88	81	NonAIDS	5.81	5.81	125.4	125.4	2	82	Simplification	INNTI	2N+1NN	15	28	309	266	43		2421		3.3	NO					1.46		YES
80444683254	2011	YES	VIH		YES	YES	NO	2011	MWW	H	45	43	NonAIDS	4.56	4.66	195	176	76	2303		IPb	2N+1IPb	25	40	213	148	65		614															462	1.3	YES
80446418405	2011	NO	VIH		NO	NO	NO	2011	MWM	H	23	19	NonAIDS	4.53	4.9	570.6	307.2	42	1266		INNTI	2N+1NN	51	1203			1254		1400
80451000392	2010	YES	VIH		NO	NO	NO	2010	Woman	F	23	16	NonAIDS	4.39	3.73	795	441.6	46	1385	Simplification	IPb	2N+1IPb	67	198	375	110	265		2485								1.3		YES		2.8	NO	YES				1.3
80451183498	2011	YES	VIH		YES	NO	NO	2011	Woman	F	67	61	NonAIDS	6.18	6.18	284.7	284.7	4	120	SIDEFF	IPb	2N+1IPb	17	39	329	273	56		2241		2.63	NO		1.92	NO		1.59		YES		1.6	YES
80453746975	2011	NO	VIH		YES	YES	NO	2011	MWW	H	45	39	AIDS	6.15	5.68	21.7	12.6	7	192	Other	IPb	2N+1IPb	64	87	911	760	151	778	2081					2.16	NO			NO					NO				5.3	3.21
80463024318	2010	NO	VIH		YES	NO	NO	2010	MWW	H	77	70	NonAIDS	4.02	4.02	237.7		3	88	Other	IPb	2N+1IPb	24	29	2338	2285	53		2321
80466564357	2012	YES	VIH		YES	YES	NO	2012	MWW	H	45	40	AIDS	5.89	5.89	27.6	27.6	17	508	Simplification	INSTI	2N+1II	1	35	263	227	36	22	1865					1.93	NO			NO										1.64
80475730360	2010	YES	VIH		YES	YES	NO	2010	Woman	F	24	17	NonAIDS	4.83	4.83	148.5		41	1228	Simplification	IPb	2N+1IPb	24	19	423	380	43		2687									NO			1.6	YES			1.64	NO		1.61
80477834046	2010	YES	VIH		NO	NO	NO	2010	Woman	F	28	25	NonAIDS	4.99	4.93	569.5	420.4	76	2313		INNTI	2N+1NN	10	358	463	95	368		930					1.3	YES			NO			1.6	YES			1.6	YES		4.97
80482250392	2011	NO	VIH		NO	NO	YES	2011	Woman	F	24	23	NonAIDS	6.21	5.16	195	275.6	6	164	Other	IPb	2N+1IPb	9	28			37		192
80483425319	2013	YES	VIH		NO	NO	NO	2013	MWM	H	49	45	NonAIDS	4.78	4.78	510.3	510.3	29	879	SIDEFF	INNTI	2N+1NN	11	16	207	180	27		1630		2.6	NO					1.6		YES				YES		1.3	YES	1.6
80484127224	2012	YES	VIH		ND	ND	NO	2012	MWM	H	29	24	AIDS		4.98		253.6	55	1675		IPb	2N+1IPb	21	424	667	222	445	604	1945		3.2	NO
80488582790	2010	YES	VIH		YES	YES	NO	2010	MWW	H	55	48	AIDS	5.64	5.64	5.9	5.9	61	1858	Simplification	IPb	2N+1IPb	0	46	246	200	46	0	2580									YES			1.3	YES			1.3	YES		1.51
80492329896	2012	NO	VIH		NO	NO	NO	2012	MWW	H	84	83	NonAIDS	4.86	4.86	454.3	454.3	64	1936		IPb	2N+1IPb	74	17			91		147
80494442165	2011	YES	VIH		NO	NO	NO	2011	Woman	F	57	52	NonAIDS	3.73	4.8	741.4	329	17	543	Other	IPb	2N+1IPb	31	1156	1383	196	1187		1699					1.8	NO
80501156092	2011	YES	VIH		NO	NO	NO	2011	Woman	F	72	66	NonAIDS	3.99	4.02	353	391.6	37	1141	Simplification	IPb	2N+1IPb	42	225	384	117	267		2409
80505581081	2011	YES	VIH		NO	NO	NO	2011	Woman	F	53	47	NonAIDS	5.11	5.11	388.6	388.6	65	1995	Other	INNTI	2N+1NN	7	40	248	201	47		2244					1.96	NO										1.3	YES
80507030666	2012	YES	VIH&HEP	VHB	ND	ND	NO	2012	Woman	F	56	51	NonAIDS		4.71			55	1653	SIDEFF	INNTI	2N+1NN	58	76	308	174	134		1806								1.6	YES	YES									1.57
80510387599	2010	NO	VIH		ND	ND	NO	2010	Woman	F	33	26	NonAIDS		1.3		1317	7	206	Simplification	IPb	2N+1IPb	1	1141	756	-386	1142		2398																2.1	NO
80515804470	2011	YES	VIH		NO	NO	NO	2011	Woman	F	43	37	NonAIDS	4.8	3.92	378.4	359.4	45	1362	SIDEFF	IPb	2N+1IPb	8	269	411	134	277		2325
80517971218	2011	YES	VIH		NO	NO	NO	2011	MWM	H	34	28	NonAIDS	3.53	5	716.1	415.1	8	269	Simplification	IPb	2N+1IPb	14	911	1015	90	925		2289					1.6	YES
80527660549	2011	YES	VIH		ND	ND	NO	2010	Woman	F	38	33	NonAIDS	4.82	4.82			0	27	Other	IPb	2N+1IPb	34	26	263	203	60		1630														YES		1.3	YES	1.3
80529655099	2010	YES	VIH		YES	YES	NO	2010	MWM	H	77	70	AIDS	5.53	5.53	38.9	38.9	1	37	SIDEFF	IPb	2N+1IPb	20	6	416	390	26	0	2456																1.3	YES
80535122097	2012	YES	VIH		YES	YES	NO	2012	MWW	H	41	40	AIDS	5.78	5.93	112.1	205.6	4	119	SIDEFF	IPb	2N+1IPb	2	27			29	17	412		3.2	NO
80537375152	2012	YES	VIH		YES	YES	NO	2012	Woman	F	43	38	AIDS	6.12	6.12	13.8	13.8	4	142	SIDEFF	IPb	2N+1IPb	0	26			26	633	1867					3.27	NO		2.3		NO
80538280725	2012	YES	VIH		ND	ND	NO	2012	MWM	H	33	28	NonAIDS		5.01		249.6	8	231	Simplification	INNTI	2N+1NN	90	35	372	247	125		2025									NO					YES		1.6	YES	1.53	3.12
80541286647	2012	YES	VIH		NO	NO	NO	2012	MWW	H	34	29	NonAIDS	1.86	4	548.5	380.7	55	1657		INNTI	2N+1NN	23	294	375	58	317		1805														YES		1.6	YES	1.6
80551326930	2012	NO	VIH&HEP	VHC	YES	YES	NO	2012	MWW	H	73	72	AIDS	5.37	5.59	142.6	142.6	61	1840		IPb	2N+1IPb	48	56			104	204	181		3.16	NO
80553432643	2011	YES	VIH		NO	NO	NO	2011	MWW	H	69	63	NonAIDS	5.21	5.15	501.6	556.7	2	63	SIDEFF	INNTI	2N+1NN	65	105	375	205	170		2212												1.3	YES	YES				1.3
80554511666	2011	NO	VIH		YES	NO	NO	2011	Woman	F	50	46	NonAIDS	5.28	5.28	305.2	282.4	43	1313	Simplification	Other	2N+2IPb	56	23	559	480	79		1336									NO										1.95
80569027126	2012	YES	VIH&HEP	VHC	YES	YES	NO	2012	MWW	H	55	50	AIDS	5.02	5.45	53.4	53.4	16	464	Other	IPb	2N+1IPb	11	31	385	343	42	38	1973		3.24	NO													5.2	NO
80575344264	2012	YES	VIH		ND	ND	NO	2012	MWW	H	66	61	NonAIDS	3.58	4		540.9	1	42	SIDEFF	INNTI	2N+1NN	7	1193	1804	604	1200		1858		2.1	NO												421	3.9	NO
80575810730	2012	YES	VIH		YES	YES	NO	2012	Woman	F	35	30	AIDS	5.82	5.82	7.8	7.8	20	606	Simplification	IPb	2N+1IPb	4	27	299	268	31	13	2016		2.65	NO		2.25	NO		1.63		NO	389	1.6	YES
80580756783	2010	YES	VIH		YES	YES	NO	2010	MWW	H	61	54	NonAIDS	5.03	5.03	20.2	20.2	18	531	Failure	INNTI	2N+1NN	8	0	637	629	8		2783																4.78	NO
80593548000	2012	YES	VIH		NO	NO	NO	2012	MWW	H	36	31	NonAIDS	4.8	4.8	399	399	10	292	Simplification	IPb	2N+1IPb	50	3	109	56	53		2103														YES	748	1.3	YES	1.3
80595928371	2011	YES	VIH		YES	NO	NO	2010	MWW	H	63	56	NonAIDS	4.72	4.72	349.3	361.7	43	1334	Simplification	IPb	2N+1IPb	31	14	342	297	45		2495
80611028016	2010	YES	VIH		YES	YES	NO	2010	MWM	H	55	48	NonAIDS	5.44	5.44	77.8	77.8	31	944	Other	IPb	2N+1IPb	30	0	494	464	30		2750		3.29	NO		2.63	NO
80612514973	2012	YES	VIH		YES	YES	NO	2012	MWW	H	35	33	NonAIDS	5.57	5.57	55.2	55.2	9	251	Other	IPb	2N+1IPb	64	52	288	172	116		794								1.3		YES		5.1	NO
80623501003	2011	YES	VIH		NO	NO	NO	2011	Woman	F	64	59	NonAIDS	5.03	5.03	474.3	562.3	40	1247	Simplification	IPb	2N+1IPb	70	71	427	286	141		1874									NO		1010	1.3	YES						3.09
80625118434	2011	YES	VIH		YES	YES	NO	2011	MWW	H	37	31	AIDS	5.26	5.26	19.9	19.9	47	1425	SIDEFF	IPb	2N+1IPb	0	17	170	153	17	0	2401	46	2.64	NO		1.43	YES			YES										1.3
80626261294	2010	YES	VIH		YES	NO	NO	2010	MWM	H	22	21	NonAIDS	3.62	3.62	260.2	340.9	91	2749		IPb	2N+1IPb	3	69			72		501					2.53	NO
80640682399	2010	YES	VIH		ND	ND	NO	2010	Woman	F	58	53	NonAIDS		4.07		246.8	86	2600		IPb	2N+1IPb	196	22	280	62	218		1762		2.06	NO											YES				1.3
80650594056	2012	YES	VIH		YES	YES	NO	2012	MWW	H	56	51	AIDS	5.07	5.07	9.9	10	26	820	Other	IPb	2N+1IPb	1	27	1074	1046	28	0	2022		2.69	NO				97	2.47	NO	NO									2.47
80653362453	2011	NO	VIH		YES	NO	NO	2011	MWW	H	48	43	NonAIDS	5.12	5.12	207.9	207.9	27	822	Failure	IPb	2N+1IPb	52	14	959	893	66		2074		2.9	NO					1.61		NO
80655666530	2012	YES	VIH		NO	NO	YES	2012	MWM	H	22	19	NonAIDS	4.99	4.24	548.9	480.8	57	1729		INNTI	2N+1NN	36	132	361	193	168		848								1.3	NO	YES				YES		1.3	YES	1.3	2.44
80662862658	2011	YES	VIH		NO	NO	NO	2011	MWW	H	62	56	NonAIDS	2.53	3.98	410.3	473.6	15	448	Simplification	IPb	2N+1IPb	14	230	356	112	244		2143														YES		1.3	YES	1.3
80685161829	2012	NO	VIH		ND	ND	NO	2012	Woman	F	58	53	AIDS	4.98	5.9		29.5	13	382	Other	IPb	2N+1IPb	16	1322	1842	504	1338	1320	2067
80701595485	2011	YES	VIH		YES	YES	NO	2011	Woman	F	56	54	NonAIDS	5.12	5.12	18.1	18.1	72	2190		IPb	2N+1IPb	30	13	273	230	43		454									NO					NO				3.66	1.65
80711326241	2013	NO	VIH		YES	NO	NO	2012	MWW	H	54	53	NonAIDS	4.73	4.73	268.4	268.4	58	1755		IPb	2N+1IPb	58	62			120		97
80716777980	2011	NO	VIH		NO	NO	YES	2011	Woman	F	51	45	NonAIDS	6.24	4	567.3	343.5	47	1419		INNTI	2N+1NN	11	939	994	44	950		2332
80719263613	2011	YES	VIH		NO	NO	NO	2011	Woman	F	45	42	NonAIDS	4.22	4.22	439.7	439.7	29	877	Simplification	IPb	2N+1IPb	21	34	202	147	55		1015		2.43	NO											YES				1.6
80721950710	2012	NO	VIH		YES	YES	NO	2012	MWW	H	35	35	NonAIDS	6.34	6.34	9.5	9.5	70	2113		IPb	2N+1IPb	22	26			48		54
80730092287	2012	YES	VIH		ND	ND	NO	2012	MWW	H	47	42	NonAIDS		5.7		269.1	16	482	Simplification	IPb	2N+1IPb	235	85	592	272	320		1830		3.26	NO		2.5	NO										1.3	YES
80731640041	2012	YES	VIH		YES	NO	NO	2012	MWW	H	31	26	NonAIDS	4.91	4.91	251.2	251.2	3	111	Simplification	INNTI	2N+1NN	11	71	178	96	82		1672					1.6	YES		1.6	YES	YES				YES				1.6	1.6
80732350647	2013	YES	VIH		NO	NO	NO	2013	MWW	H	70	66	NonAIDS	5.02	4.7	370.4	401.4	51	1557	Other	INNTI	2N+1NN	26	63	214	125	89		1659
80738872707	2012	YES	VIH		YES	YES	NO	2012	MWW	H	58	53	NonAIDS	5.23	5.23	132.9	132.9	42	1297	SIDEFF	IPb	2N+1IPb	16	9	266	241	25		1881		3.16	NO											YES				1.3
80748424709	2011	YES	VIH		NO	NO	NO	2011	MWW	H	49	47	NonAIDS	4.8	5.08	460.8	317.5	14	428	SIDEFF	IPb	2N+1IPb	21	262	696	413	283		690														NO				2.17
80755031764	2011	YES	VIH		YES	NO	NO	2011	MWM	H	47	41	NonAIDS	5.11	5.11	348.7	481.3	0	11	Other	IPb	2N+1IPb	8	26	236	202	34		2524														YES				1.38
80757534206	2011	YES	VIH		NO	NO	NO	2010	Woman	F	51	44	NonAIDS	3.75	3.42	381.7	467.5	2	63	SIDEFF	IPb	2N+1IPb	19	406	505	80	425		2443								1.3		YES						1.3	YES
80759064436	2012	YES	VIH		NO	NO	NO	2012	Woman	F	56	51	NonAIDS	3.99	3.99	382.6	382.6	61	1848		INNTI	2N+1NN	5	41	208	162	46		1791
80772625148	2012	NO	VIH		YES	YES	NO	2012	MWW	H	48	46	AIDS	5.46	6.3	73.5	44.2	0	11	Other	IPb	2N+1IPb	62	605			667	648	616
80780544460	2010	YES	VIH		YES	YES	NO	2010	Woman	F	40	34	AIDS	5.28	2.81	65.4	382	91	2764		IPb	2N+1IPb	24	48	746	674	72	0	2205														NO				3.45
80781582117	2011	YES	VIH		YES	YES	NO	2011	Woman	F	79	75	NonAIDS	4.36	4.36	117.8	117.8	50	1534	Other	IPb	2N+1IPb	42	60	236	134	102		1594														NO				1.66
80785652756	2012	YES	VIH		NO	NO	NO	2012	Woman	F	53	48	NonAIDS		5.04	644.5	580.6	3	77	SIDEFF	INNTI	2N+1NN	0	261	440	179	261		2057								1.3		YES				NO				1.64
80794933498	2012	YES	VIH		ND	ND	NO	2012	Woman	F	61	56	NonAIDS					24	719	Simplification	IPb	2N+1IPb	23	0	413	390	23		1986									NO							1.3	YES		2.2
80798092067	2010	YES	VIH		YES	YES	NO	2010	MWW	H	67	60	NonAIDS	3.45	3.45	63.4	10.6	1	44	SIDEFF	IPb	2N+1IPb	2	12	71	57	14		2736		2.57	NO		1.3	YES
80798900783	2011	NO	VIH		YES	YES	NO	2011	MWW	H	46	40	AIDS	4.51	4.51	221.3	242.3	1	15	Other	INSTI	2N+1II	15	14	2123	2094	29	15	2184
80807029366	2012	NO	VIH		YES	NO	NO	2011	MWW	H	27	21	NonAIDS	4.26	3.2	210.2	250.2	33	1000		INNTI	2N+1NN	36	1183	1345	126	1219		2138
80818599879	2012	YES	VIH		YES	NO	NO	2012	MWM	H	41	36	NonAIDS	4.77	4.77	309.3	309.3	51	1530	Other	INNTI	2N+1NN	7	39	140	94	46		1744		2.22	NO		1.3	YES
80824764430	2010	YES	VIH		YES	YES	NO	2010	Woman	F	54	51	NonAIDS	4.61	4.61	165.9	165.9	3	78	SIDEFF	IPb	2N+1IPb	9	20	142	113	29		1075		3.19	NO					1.3		YES		2.72	NO	NO				4.66
80825481593	2010	YES	VIH		YES	YES	NO	2010	Woman	F	43	36	AIDS	5.4	5.4	17	17	0	9	SIDEFF	INNTI	2N+1NN	43	33	653	577	76	43	2612									NO							1.6	YES		2.11
80827480554	2013	NO	VIH		NO	NO	YES	2013	MWW	H	32	28	AIDS	7.27	4.78	581.3	581.3	3	102	Other	IPb	2N+1IPb	18	9	1403	1376	27	784	1696
80835561275	2012	YES	VIH		NO	NO	NO	2012	Woman	F	20	15	NonAIDS	4.12	4.5	819.6	314.1	19	570	Simplification	IPb	2N+1IPb	18	178	382	186	196		1597				480	1.3	YES	444	1.3		YES						1.6	YES
80839600622	2011	YES	VIH		NO	NO	NO	2014	MWM	H	58	55	NonAIDS	5.5	5.5	460.8	460.8	34	1038	Other	INSTI	2N+1II	14	5	198	179	19		1044					2	NO						1.3	YES	YES				1.3
80841472804	2010	YES	VIH		YES	YES	NO	2010	Woman	F	52	45	AIDS	5.55	5.55	98.4	98.4	11	316	SIDEFF	IPb	2N+1IPb	10	0			10	92	2710									YES					YES				1.58	1.45
80842015564	2011	YES	VIH		YES	YES	NO	2010	MWW	H	52	45	AIDS	5.48	5.48	7.5	7.5	41	1237	Simplification	IPb	2N+1IPb	50	10	353	293	60	0	2519														YES				1.6
80856746852	2011	NO	VIH&HEP	VHB	NO	NO	NO	2011	MWW	H	61	55	AIDS	6.01	6	474	81.7	1	10	Other	IPb	2N+1IPb	6	1420			1426	1414	2223							77	6.3		NO
80859478175	2011	YES	VIH		YES	YES	NO	2011	MWW	H	42	36	NonAIDS	4.77	4.77	169.3	169.3	24	720	Simplification	IPb	2N+1IPb	16	20	84	48	36		2226								1.6		YES				YES				1.6
80866771936	2010	YES	VIH		YES	YES	NO	2010	MWW	H	57	50	NonAIDS	4.9	4.9	90.4	90.4	28	845	Simplification	IPb	2N+1IPb	7	28	235	200	35		2406					1.97	NO
80868099391	2012	YES	VIH		NO	NO	NO	2012	MWM	H	42	37	NonAIDS	3.88	3.88	460.7	460.7	62	1861		INNTI	2N+1NN	28	14	72	30	42		1749					1.3	YES								YES				1.3
80872860193	2013	YES	VIH&HEP	VHC	ND	ND	NO	2013	MWW	H	61	57	AIDS		5.6		337	14	420	Simplification	IPb	2N+1IPb	102	15	1573	1456	117	1062	1602		3.8	NO	640	2.7	NO										2.3	NO
80876720607	2010	YES	VIH		YES	NO	NO	2010	Woman	F	37	35	NonAIDS	5.08	5.08	237.9	237.9	85	2560		IPb	2N+1IPb	18	16	211	177	34		634								1.3	YES	YES						1.6	YES		1.51
80878643214	2010	YES	VIH		NO	NO	NO	2010	MWW	H	18	16	NonAIDS	4.91	4.52	394.4	381.7	87	2620		IPb	2N+1IPb	16	82	405	307	98		858																1.6	YES
80885708034	2012	YES	VIH		NO	NO	NO	2012	Woman	F	39	34	NonAIDS	4.67	4.67	475	475	16	476	Simplification	IPb	2N+1IPb	0	7	136	129	7		1910		2.86	NO		1.71	NO
80888378322	2011	YES	VIH&HEP	VHC&VHB	YES	YES	NO	2011	MWW	H	52	46	AIDS	5.79	5.79	21.8	21.8	17	528	Other	IPb	2N+1IPb	2	12	70	56	14	0	2175		3.42	NO					1.67		NO
80893062770	2013	YES	VIH		YES	YES	NO	2013	MWW	H	58	54	AIDS	5.96	5.96	10	10	26	812	Simplification	IPb	2N+1IPb	16	17	358	325	33	35	1659		3.32	NO	88	2.4	NO			NO					YES				1.3	2.8
80893398463	2011	YES	VIH		YES	YES	NO	2010	Woman	F	48	41	AIDS	5.86	5.86	17.7	17.7	84	2538		IPb	2N+1IPb	25	16	108	67	41	42	2544		2.54	NO						YES					YES				1.51	1.3
80893459498	2013	YES	VIH		YES	YES	NO	2013	Woman	F	63	59	NonAIDS	5	5	60	60	56	1678		INNTI	2N+1NN	19	22	260	219	41		1548									NO					YES				1.6	1.9
80897152125	2010	YES	VIH		YES	YES	NO	2010	MWW	H	59	52	AIDS	5.17	5.17	19.4	19.4	55	1660	Simplification	INSTI	2N+1II	20	35	258	203	55	20	2789					1.41	YES								YES				1.3
80899135768	2012	NO	VIH		YES	YES	NO	2012	Woman	F	52	47	AIDS	5.19	5.19	175.5	175.5	10	301	Simplification	IPb	2N+1IPb	0	13	112	99	13	7	1798					1.3	YES								YES		1.3	YES	1.3
80901923775	2011	YES	VIH		NO	NO	NO	2011	Woman	F	34	28	NonAIDS	1.57	1.57	832.5	832.5	4	121	Other	IPb	2N+1IPb	85	0	147	62	85		2242					1.3	YES			YES										1.3
80904917299	2013	NO	VIH		YES	YES	NO	2013	Woman	F	28	24	AIDS	4.6	4.6	177	177	6	165	Other	IPb	2N+1IPb	1	8	92	83	9	1572	1662	200	2.4	NO	280	1.3	YES		1.3	YES	YES									1.3
80907039821	2012	YES	VIH		NO	NO	NO	2012	MWW	H	66	61	NonAIDS	4.67	4.67	496.9	358.9	48	1442	Other	INNTI	2N+1NN	0	274	428	154	274		2058
80918880641	2010	YES	VIH		NO	NO	NO	2010	Woman	F	25	23	NonAIDS	3.32	4.36	903.8	741.9	0	16	SIDEFF	IPb	2N+1IPb	5	413	526	108	418		715		1.84	NO
80919682800	2011	YES	VIH		YES	NO	NO	2010	Woman	F	61	54	NonAIDS	4.9	4.9	253.2	253.2	51	1552	Simplification	IPb	2N+1IPb	39	28	246	179	67		2447					2.21	NO		1.6		YES				YES				1.6
80924343288	2012	YES	VIH		YES	NO	NO	2012	Woman	F	88	83	NonAIDS	5.24	5.24	260.6	260.6	25	771	Simplification	IPb	2N+1IPb	62	14	274	198	76		2022					2.42	NO			NO										2.42
80947118103	2010	NO	VIH		YES	NO	NO	2010	Woman	F	31	30	NonAIDS	3.58	1.3	321.5	378.2	83	2520		IPb	2N+1IPb	6	144	123	-27	150		274	356	1.3	YES						YES										1.3
80947979152	2012	YES	VIH		YES	NO	NO	2013	MWM	H	35	31	NonAIDS	4.44	4.44	288.7	288.7	58	1767		INNTI	2N+1NN	4	10	189	175	14		1737		2.13	NO				471	1.3	YES	YES		1.6	YES		658	1.3	YES		1.3
80961834132	2013	YES	VIH		YES	YES	NO	2013	Woman	F	41	37	AIDS	6.39	6.39	299.5	350.7	10	301	Simplification	IPb	2N+1IPb	3	8	227	216	11	50	1728					2	NO
80982993543	2010	YES	VIH		YES	NO	NO	2010	MWW	H	55	48	NonAIDS	4.95	4.95	212.7	212.7	43	1314	Simplification	IPb	2N+1IPb	69	25	258	164	94		2767									NO			1.3	YES			1.3	YES		3.48
80988776803	2013	YES	VIH		YES	YES	NO	2013	Woman	F	64	60	NonAIDS	6.6	6.6	60	60	21	661	Simplification	IPb	2N+1IPb	12	13	397	372	25		1689	413	4	NO	372	2.6	NO	305	1.5		YES		1.6	YES
80992992639	2012	NO	VIH&HEP	VHB	NO	NO	NO	2012	Woman	F	70	66	NonAIDS	3.77	3.77	441	441	1	27	SIDEFF	INNTI	2N+1NN	51	50	195	94	101		1509		2.2	NO		1.3	YES			YES							1.3	YES		1.3
80999381486	2013	YES	VIH		YES	NO	NO	2013	Woman	F	49	45	NonAIDS	4.1	4.2	268.4	270.1	57	1742	Other	INNTI	2N+1NN	25	28	150	97	53		1599		2.1	NO		1.3	YES						1.6	YES			1.6	YES
80999381488	2013	YES	VIH		NO	NO	NO	2013	Woman	F	44	40	NonAIDS	4.4	4.5	379.9	327	54	1617		INNTI	2N+1NN	15	69	784	700	84		1597		1.7	NO		2.2	NO		1.7	NO	NO		1.6	YES						2.2
80999381489	2013	YES	VIH		NO	NO	YES	2013	Woman	F	70	66	NonAIDS	5.02	4.2	539.2	580.5	10	295	Simplification	IPb	2N+1IPb	7	26	210	177	33		1597								1.6		YES						1.6	YES
80999381500	2013	YES	VIH		YES	YES	NO	2013	MWW	H	52	48	NonAIDS	4.5	4.5	44.2	44.2	55	1658		INNTI	2N+1NN	19	14	133	100	33		1590		1.4	YES	390	1.3	YES										1.3	YES
80999381504	2013	YES	VIH		NO	NO	NO	2013	MWM	H	28	24	NonAIDS	5.1	5.1	420	420	18	540	Simplification	IPb	2N+1IPb	25	55	176	96	80		1499				612	1.6	YES			YES										1.6
80999381514	2013	NO	VIH		YES	YES	NO	2013	Woman	F	38	34	AIDS	5.4	5.4	8.9	8.9	0	6	Other	INNTI	2N+1NN	8	21	897	868	29	22	1518															0	5.3	NO
80999381517	2013	NO	VIH		ND	ND	NO	2012	Woman	F	46	44	AIDS		5		58.4	7	223	SIDEFF	IPb	2N+1IPb	270	9			279	270	329	110	4.9	NO	60	4.7	NO		5		NO				NO				4.7
80999381520	2013	YES	VIH		YES	NO	NO	2013	MWM	H	37	33	NonAIDS	3.7	3.7	285.1	285.1	55	1647		INNTI	2N+1NN	8	11	70	51	19		1443
80999381521	2013	YES	VIH		YES	NO	NO	2013	Woman	F	52	48	NonAIDS	4.4	4.4	330	330	18	569	Simplification	IPb	2N+1IPb	0	22	121	99	22		1578				829	1.3	YES		1.3	YES	YES		1.6	YES						1.3
80999381528	2013	YES	VIH		YES	NO	NO	2013	Woman	F	44	40	NonAIDS	3.7	3.7	270.2	270.2	0	20	SIDEFF	IPb	2N+1IPb	0	10	136	126	10		1588		2.5	NO		2.1	NO			YES			1.6	YES			1.3	YES		1.3
80999381532	2013	NO	VIH		YES	NO	NO	2013	MWW	H	54	50	NonAIDS	2.4	2.4	298.2	298.2	54	1618		INNTI	2N+1NN	32	26	84	26	58		1492	517	1.3	YES		1.3	YES		1.3		YES		1.3	YES			1.3	YES
80999381533	2013	YES	VIH		NO	NO	YES	2013	MWW	H	66	62	NonAIDS	5.6	5.6	288.9	288.9	20	609	Simplification	IPb	2N+1IPb	15	9	162	138	24		1557												1.3	YES			1.3	YES
80999381537	2013	NO	VIH		YES	YES	NO	2013	Woman	F	54	49	AIDS	5.3	5.3	170	170	5	151	Other	INSTI	2N+1II	2	32	99	65	34	18	1662					1.8	NO
80999381544	2013	YES	VIH		YES	NO	NO	2013	MWW	H	51	47	NonAIDS	4.8	4.8	340	340	19	574	SIDEFF	INNTI	2N+1NN	7	23	456	426	30		1500		3	NO	402	2.2	NO		1.6		YES
80999381546	2013	YES	VIH		YES	NO	NO	2013	Woman	F	43	39	AIDS		5	330	390	10	308	SIDEFF	IPb	2N+1IPb	86	426			512	805	1357	510	3.6	NO		1.5	YES		2.5		NO
80999381548	2013	YES	VIH		YES	YES	NO	2013	MWW	H	32	29	AIDS	5.3	5.45	53.4	2.1	39	1172		IPb	2N+1IPb	19	452	938	467	471	464	940
80999381560	2013	YES	VIH		YES	YES	NO	2013	Woman	F	44	42	AIDS	5.1	5.1	16.9	16.9	23	720	Simplification	IPb	2N+1IPb	2	21	323	300	23	2	860		2.6	NO					2.5		NO
80999381564	2013	YES	VIH		YES	YES	NO	2013	MWW	H	66	63	NonAIDS	5.3	5.6	150	133.2	12	379	Failure	IPb	2N+1IPb	18	27	621	576	45		916								1.7	NO	NO		2.2	NO			1.6	YES		1.7
80999381570	2013	YES	VIH		YES	YES	NO	2013	Woman	F	49	45	NonAIDS	4.4	4.36	69.3	70.4	2	83	Simplification	INNTI	2N+1NN	15	17	185	153	32		1462		2	NO						YES			1.3	YES			1.6	YES		1.6
80999381579	2013	NO	VIH		YES	YES	NO	2013	MWW	H	89	88	NonAIDS	5.4	5.4	98.2	98.2	6	184	Other	IPb	2N+1IPb	40	27			67		212
80999381581	2012	YES	VIH		YES	YES	NO	2012	Woman	F	46	41	AIDS	5.37	5.37	11.5	11.5	4	116	Other	IPb	2N+1IPb	0	93	491	398	93	0	1786									NO					NO				2.2	2
80999381614	2013	YES	VIH		ND	ND	NO	2013	MWW	H	63	59	NonAIDS		4.8		327.3	50	1517		INNTI	2N+1NN	243	22	489	224	265		1263					1.5	YES								YES		1.3	YES	1.5
80999381619	2012	YES	VIH		ND	ND	NO	2012	Woman	F	35	33	NonAIDS		3.5		814.1	50	1505		INNTI	2N+1NN	58	357			415		438
80999381627	2013	YES	VIH		ND	ND	NO	2012	Woman	F	34	29	AIDS		4.6		110	50	1522		IPb	2N+1IPb	361	10	630	259	371	361	1506		3.4	NO				310	1.8		NO				NO		1.9	NO	4.6
80999381640	2013	YES	VIH		NO	NO	NO	2013	Woman	F	60	56	NonAIDS	4.4	4.4	370	370	32	962	SIDEFF	INNTI	2N+1NN	36	70	198	92	106		1430		2	NO		1.3	YES		1.6		YES				YES				1.3
80999381644	2013	NO	VIH		NO	NO	NO	2013	MWM	H	22	19	NonAIDS	4.7	4.7	400	400	7	234	Simplification	IPb	2N+1IPb	21	14	252	217	35		953
80999381645	2013	YES	VIH		YES	YES	NO	2013	Woman	F	48	44	NonAIDS	4.9	4.9	90	90	6	190	Simplification	IPb	2N+1IPb	60	14	175	101	74		1310		2.4	NO					1.6	YES	YES									1.6
80999381656	2013	YES	VIH		NO	NO	NO	2013	Woman	F	29	25	NonAIDS	5.2	5.2	353.3	353.3	33	1016	Simplification	IPb	2N+1IPb	17	15	281	249	32		1444					2.5	NO		1.69		NO		1.5	YES			1.3	YES
80999381660	2013	YES	VIH		YES	YES	NO	2013	Woman	F	32	28	AIDS	5.5	5.3	20.7	20.7	27	841	Simplification	IPb	2N+1IPb	0	14	210	196	14	3	1310		2.6	NO		1.3	YES						1.6	YES	YES				1.6
80999381670	2013	NO	VIH		NO	NO	NO	2011	MWW	H	56	50	AIDS	3.1	3.2	1127.5	1289	13	394	Simplification	IPb	2N+1IPb	854	693	1743	196	1547	1525	1330				1058	1.6	YES					1367	1.6	YES
80999381686	2013	YES	VIH		NO	NO	NO	2013	Woman	F	36	32	NonAIDS	4.4	4.4	473.6	473.6	22	689	Simplification	IPb	2N+1IPb	78	14	182	90	92		1353					1.3	YES		1.6	YES	YES						1.3	YES		1.3
80999381688	2013	YES	VIH		YES	YES	NO	2013	MWW	H	38	34	NonAIDS	4.7	4.7	91.5	91.5	0	17	Other	IPb	2N+1IPb	23	17	555	515	40		1384														NO				2.35
80999381698	2013	YES	VIH		ND	ND	NO	2013	MWM	H	49	45	NonAIDS		4.7		535.3	48	1432		INNTI	2N+1NN	92	41	273	140	133		1399									NO										3.3
80999381711	2014	YES	VIH		YES	YES	NO	2014	MWM	H	38	35	NonAIDS	5.9	5.9	40.8	40.8	30	894	Simplification	IPb	2N+1IPb	12	31	361	318	43		1219														YES				1.6
80999381714	2014	NO	VIH		ND	ND	NO	2013	Woman	F	22	20	NonAIDS		3.61		572.5	1	28	SIDEFF	IPb	2N+1IPb	220	3	356	133	223		622		2.5	NO									1.3	YES	YES				1.3
80999381715	2014	YES	VIH		YES	NO	NO	2013	Woman	F	71	67	NonAIDS	4.5	4.3	323.4	270.6	47	1413		INNTI	2N+1NN	58	27	268	183	85		1337		2	NO		1.4	YES	462	1.6	YES	YES		1.6	YES			1.6	YES		1.4
80999381723	2014	YES	VIH		NO	NO	NO	2014	MWM	H	24	21	NonAIDS	5.7	5.7	439.1	439.1	6	169	SIDEFF	INNTI	2N+1NN	7	20	232	205	27		1226	794	2.9	NO						NO					YES				1.6	1.8
80999381724	2014	YES	VIH		NO	NO	NO	2014	Woman	F	44	41	NonAIDS	3.7	3.71	353.9	360	10	288	Simplification	IPb	2N+1IPb	15	14	103	74	29		1277		1.7	NO						YES							1.6	YES		1.6
80999381725	2014	YES	VIH		YES	NO	NO	2014	MWW	H	66	63	NonAIDS	3	3	334.6	334.6	43	1306		INNTI	2N+1NN	14	121	196	61	135		1395
80999381750	2014	YES	VIH		NO	NO	NO	2014	Woman	F	37	34	NonAIDS	3.2	3.2	597.4	597.4	1	21	SIDEFF	INNTI	2N+1NN	0	34	114	80	34		1219		1.4	YES		1.6	YES
80999381765	2014	NO	VIH		ND	ND	NO	2012	MWW	H	55	51	NonAIDS		5		262	41	1221		IPb	2N+1IPb	763	198	1694	733	961		940	390	3.3	NO
80999381769	2014	YES	VIH		NO	NO	NO	2014	Woman	F	32	29	NonAIDS	3.8	3.8	398.1	398.1	47	1404		INNTI	2N+1NN	1	15	216	200	16		1402
80999381772	2014	YES	VIH		YES	YES	NO	2014	Woman	F	48	45	AIDS	5.7	6	39.4	40	41	1230	Simplification	IPb	2N+1IPb	4	16	432	412	20	16	1386		3.1	NO		1.3	YES			YES					YES				1.3	1.3
80999381776	2014	YES	VIH		NO	NO	NO	2014	Woman	F	29	26	NonAIDS	3.6	3.6	459	459	9	266	Other	INNTI	2N+1NN	3	8	108	97	11		1319					1.3	YES		1.3		YES				YES				1.6
80999381777	2014	YES	VIH		YES	YES	NO	2014	MWW	H	36	33	NonAIDS	5.2	5.2	90.2	90.2	7	208	Simplification	IPb	2N+1IPb	9	8	213	196	17		1371		2.8	NO		1.9	NO
80999381817	2014	YES	VIH		NO	NO	NO	2014	Woman	F	44	41	NonAIDS	4.9	4.9	649.9	649.9	8	222	Simplification	IPb	2N+1IPb	2	0	208	206	2		1333												1.3	YES	YES		1.3	YES	1.3
80999381820	2014	YES	VIH		NO	NO	NO	2014	MWW	H	26	24	NonAIDS	5.1	5.1	492.2	492.2	30	890	Other	INSTI	2N+1II	17	60	297	220	77		995		1.5	YES						NO										1.8
80999381822	2014	YES	VIH		YES	NO	NO	2014	MWW	H	29	26	NonAIDS	5.2	5.2	287.5	287.5	3	71	SIDEFF	IPb	2N+1IPb	20	27	198	151	47		1324																1.3	YES
80999381830	2014	YES	VIH		YES	YES	NO	2014	Woman	F	67	64	AIDS	4.74	4.74	59.7	59.7	4	112	Other	IPb	2N+1IPb	1	19	168	148	20	1	1174		2.1	NO		2.1	NO			YES										1.3
80999381846	2014	YES	VIH		NO	NO	NO	2014	MWM	H	27	24	NonAIDS	4.8	4.8	380	380	44	1341		INNTI	2N+1NN	15	44	275	216	59		1296					2	NO								YES				1.6
80999381852	2014	YES	VIH		YES	NO	NO	2014	MWW	H	48	45	NonAIDS	4.9	4.9	332.1	332.1	19	568	Simplification	IPb	2N+1IPb	13	125	545	407	138		1254	405	2.6	NO	407	2.1	NO		1.6	NO	YES						1.3	YES		2.6
80999381855	2014	NO	VIH		NO	NO	NO	2014	Woman	F	47	45	NonAIDS	4.92	4.5	440.8	342.5	20	600		INNTI	2N+1NN	0	803			803		803
80999381859	2014	YES	VIH		YES	YES	NO	2014	MWW	H	42	39	AIDS	4.7	4.7	145.2	145.2	11	329	Simplification	INSTI	2N+1II	14	49	152	89	63	11	1349		1.9	NO		1.3	YES		1.3		YES				NO				1.7
80999381864	2014	YES	VIH		YES	NO	NO	2014	MWM	H	32	29	NonAIDS	4	4	281	281	43	1291		INNTI	2N+1NN	6	80	296	210	86		1298		1.7	NO						YES					YES				1.3	1.4
80999381865	2014	YES	VIH		NO	NO	NO	2014	MWM	H	31	28	NonAIDS	4.1	4.1	693.4	693.4	44	1341		INNTI	2N+1NN	0	42	131	89	42		1366					1.6	YES						1.6	YES
80999381870	2014	YES	VIH		YES	YES	NO	2014	MWW	H	40	37	NonAIDS	4.8	4.8	132.5	132.5	18	557	Simplification	IPb	2N+1IPb	24	23	208	161	47		1240		2.4	NO		2	NO										1.3	YES
80999381878	2014	YES	VIH		NO	NO	NO	2014	Woman	F	49	46	NonAIDS	3.6	3.6	681.4	681.4	44	1337		INNTI	2N+1NN	28	20	140	92	48		1196		2.1	NO		1.3	YES		1.6		YES				YES				1.6
80999381881	2014	YES	VIH		NO	NO	NO	2014	MWM	H	43	40	NonAIDS	2.8	2.8	583.1	583.1	45	1342		INNTI	2N+1NN	16	13	90	61	29		1152																1.3	YES
80999381885	2014	YES	VIH		YES	YES	NO	2014	MWW	H	56	53	NonAIDS	5	5	69	69	19	563	Other	IPb	2N+1IPb	38	49	300	213	87		1298	125	2.8	NO		2.1	NO			NO					YES				1.6	2.1
80999381891	2014	YES	VIH		NO	NO	NO	2014	Woman	F	34	31	NonAIDS	3.6	3.6	403.5	403.5	10	309	Simplification	IPb	2N+1IPb	15	12	104	77	27		1253	444	2.2	NO						YES							1.3	YES		1.3
80999381895	2014	NO	VIH		NO	NO	NO	2014	MWW	H	50	47	AIDS	5.4	5.3	420	706.5	1	37	Simplification	INSTI	2N+1II	14	1227			1241	1239	1310
80999381896	2014	YES	VIH		YES	NO	NO	2014	MWW	H	23	20	NonAIDS	3.2	3.2	234.6	234.6	16	484	Simplification	IPb	2N+1IPb	6	13	57	38	19		1101
80999381905	2014	YES	VIH		NO	NO	NO	2014	Woman	F	30	27	NonAIDS	3.8	3.8	600.2	600.2	1	22	Other	Other	2N+1IPb+1II	13	0	99	86	13		1303					1.3	YES
80999381929	2014	NO	VIH		YES	YES	NO	2014	MWW	H	49	46	NonAIDS	5.2	5.1	130.7	120	41	1241	Other	INSTI	2N+1II	18	83	227	126	101		1107
80999381930	2014	YES	VIH		NO	NO	NO	2014	MWW	H	54	51	NonAIDS	5.9	5.9	421.9	421.9	10	294	Other	INSTI	2N+1II	9	22			31		1214	630	2.8	NO		2.4	NO		1.7	NO	NO									2
80999381931	2014	YES	VIH&HEP	VHC	YES	NO	NO	2014	MWM	H	21	20	NonAIDS	4.8	4.8	295.5	295.5	3	92	Other	IPb	2N+1IPb	18	36			54		478									NO		479	4.6	NO						4.5
80999381966	2014	YES	VIH		NO	NO	NO	2014	Woman	F	27	24	NonAIDS	4.1	4.1	1070	1070	20	587	Simplification	IPb	2N+1IPb	21	8	132	103	29		1175									YES		5505	1.3	YES	YES		1.3	YES	1.6	1.3
80999381972	2014	YES	VIH		ND	ND	NO	2011	MWW	H	51	45	NonAIDS		3.6		306.2	8	255	Simplification	IPb	2N+1IPb	1128	32	1371	211	1160		1250		1.7	NO
80999381978	2014	YES	VIH		YES	YES	NO	2014	MWW	H	44	41	AIDS	5.45	5.4	19.9	16.1	1	35	Other	IPb	2N+1IPb	0	14	173	159	14	43	1171									YES										1.3
80999381980	2014	YES	VIH&HEP	VHB	ND	ND	NO	2012	MWW	H	41	36	NonAIDS		4.4		38.9	2	49	Failure	IPb	2N+1IPb	939	23	1124	162	962		1183		5	NO		1.3	YES						1.3	YES
80999381981	2014	NO	VIH		NO	NO	NO	2014	MWM	H	32	31	NonAIDS	2.4	2.4	788.2	788.2	40	1194		INNTI	2N+1NN	31	59	143	53	90		302
80999381987	2014	YES	VIH		YES	YES	NO	2014	MWW	H	71	68	AIDS	4.93	4.93	167.4	167.4	10	306	SIDEFF	INNTI	2N+1NN	3	26	231	202	29	4	1168				410	1.9	NO
80999381990	2014	YES	VIH		YES	YES	NO	2014	MWM	H	30	27	NonAIDS	5.8	5.8	144.6	144.6	12	353	Simplification	IPb	2N+1IPb	14	13	415	388	27		1189								1.5		YES				YES				1.6
80999381991	2014	YES	VIH		YES	YES	NO	2014	Woman	F	59	56	NonAIDS	5.4	5.4	13.2	13.2	2	63	SIDEFF	IPb	2N+1IPb	21	14	214	179	35		1157		3	NO	237	1.7	NO		1.6		YES		2.19	NO
80999381992	2014	YES	VIH		NO	NO	NO	2014	MWM	H	33	30	NonAIDS	4	4	557.2	557.2	19	586	Other	INNTI	2N+1NN	9	63	284	212	72		1170		1.6	YES						YES							1.6	YES		1.6
80999382007	2014	YES	VIH		YES	YES	NO	2014	Woman	F	18	15	NonAIDS	5.1	5.1	131.8	131.8	8	245	Other	IPb	2N+1IPb	5	13	637	619	18		1052								2	NO	NO				NO		2.4	NO	1.9	2
80999382009	2014	YES	VIH		YES	NO	NO	2014	MWM	H	43	40	NonAIDS	4.8	4.8	258.1	294.6	30	924	Other	INSTI	2N+1II	62	15	118	41	77		1226									YES			1.3	YES						1.3
80999382012	2014	YES	VIH		YES	YES	NO	2014	MWW	H	45	42	NonAIDS	4.6	4.6	40.1	40.1	17	519	Simplification	IPb	2N+1IPb	1	13	198	184	14		1120	80	1.72	NO					1.6		YES				YES		1.6	YES	1.6
80999382025	2014	YES	VIH		YES	NO	NO	2014	MWM	H	27	24	NonAIDS	7.3	7.3	205.1	205.1	13	406	Simplification	IPb	2N+1IPb	5	15	413	393	20		1212				360	2.7	NO										1.3	YES
80999382026	2014	YES	VIH		YES	NO	NO	2014	MWW	H	46	43	NonAIDS	5.54	5.54	239.7	239.7	9	280	Simplification	IPb	2N+1IPb	9	13	898	876	22		1058		3.5	NO		2.57	NO		2.2		NO						1.3	YES
80999382031	2014	YES	VIH		NO	NO	NO	2014	Woman	F	50	47	NonAIDS	4.04	4.04	401.5	401.5	6	181	Simplification	IPb	2N+1IPb	26	20	171	125	46		1168									YES							1.3	YES		1.3
80999382037	2014	YES	VIH		YES	NO	NO	2014	MWW	H	51	48	NonAIDS	4.9	4.9	230	230	11	348	Simplification	IPb	2N+1IPb	16	59	351	276	75		1169		3	NO		1.7	NO		1.6		YES				YES				1.6
80999382041	2014	YES	VIH		YES	YES	NO	2014	MWW	H	67	64	NonAIDS	4.9	4.9	51.3	41.2	12	379	Simplification	IPb	2N+1IPb	28	19	252	205	47		1080					2.5	NO						1.6	YES			1.6	YES
80999382068	2014	YES	VIH		YES	YES	NO	2014	MWW	H	40	37	NonAIDS	4.77	4.77	150	150	9	268	Simplification	IPb	2N+1IPb	12	4	484	468	16		1007	200	2.7	NO		1.3	YES
80999382069	2014	NO	VIH		NO	NO	YES	2014	MWW	H	26	23	NonAIDS	6	6	460	460	5	147	Simplification	IPb	2N+1IPb	7	17	436	412	24		1080	1145	3.3	NO				1337	2		NO
80999382078	2014	YES	VIH		NO	NO	NO	2014	MWM	H	42	39	NonAIDS	4.7	4.7	437.6	437.6	39	1183	Other	INNTI	2N+1NN	7	62	160	91	69		1064					1.6	YES								NO				2
80999382121	2014	YES	VIH		NO	NO	NO	2014	MWM	H	19	17	NonAIDS	3.9	3.9	558.9	558.9	12	384	Other	INSTI	2N+1II	16	16	266	234	32		462		1.3	YES					3		NO
80999382128	2014	NO	VIH		YES	NO	NO	2014	Woman	F	47	45	NonAIDS	2.5		212.6	212.6	37	1123		IPb	2N+1IPb	12	10			22		675		2.5	NO
80999382135	2014	YES	VIH		NO	NO	NO	2014	Woman	F	58	55	NonAIDS	5.3	5.6	491.3	540.7	36	1096	Other	INNTI	2N+1NN	29	58	560	473	87		1119					2	NO			NO										2
80999382141	2014	YES	VIH		YES	YES	NO	2014	MWM	H	22	19	AIDS	5.1	5.1	213.5	213.5	21	650	Simplification	IPb	2N+1IPb	26	9	469	434	35	49	1093		3.1	NO	520	2.3	NO			YES										1.3
80999382145	2014	NO	VIH		YES	NO	NO	2014	MWW	H	55	54	NonAIDS	5.6	5.6	307.4	307.4	37	1110		IPb	2N+1IPb	1	12	123	110	13		235
80999382147	2014	NO	VIH		YES	YES	NO	2014	MWM	H	27	26	NonAIDS	4.5	4.5	157.5	157.5	36	1089		INNTI	2N+1NN	8	23	193	162	31		190									YES										1.3
80999382149	2014	YES	VIH		YES	NO	NO	2014	MWM	H	26	23	NonAIDS	5.1	5.1	289.8	289.8	6	175	Simplification	IPb	2N+1IPb	17	27	206	162	44		987				370	2.1	NO									504	1.4	YES
80999382173	2015	YES	VIH		YES	NO	NO	2015	MWW	H	57	55	AIDS	5.6	5.6	430	430	6	174	Simplification	INSTI	2N+1II	5	9	144	130	14	0	1023																1.4	YES
80999382180	2015	YES	VIH		NO	NO	NO	2015	MWW	H	49	48	NonAIDS	3.9	3.9	657.3	657.3	34	1034		INSTI	2N+1II	28	30	86	28	58		625		1.3	YES		1.3	YES
80999382183	2015	YES	VIH		NO	NO	NO	2015	Woman	F	53	51	NonAIDS	4.4	4.4	412	412	35	1040		INNTI	2N+1NN	5	22	188	161	27		882		2.6	NO		1.9	NO			YES			1.6	YES	YES				1.6	1.3
80999382204	2015	NO	VIH		YES	YES	NO	2015	MWM	H	29	27	NonAIDS	4.6	4.6	15.2	15.2	26	793	SIDEFF	INNTI	2N+1NN	9	11	587	567	20		853																1.3	YES
80999382209	2015	YES	VIH		NO	NO	NO	2015	Woman	F	30	28	NonAIDS	3.7	3.7	574.6	574.6	8	252	Simplification	IPb	2N+1IPb	15	20	139	104	35		994									YES					YES				1.6	1.3
80999382210	2015	YES	VIH		YES	NO	NO	2015	MWW	H	37	35	NonAIDS	4.8	4.8	223.1	223.1	7	237	Simplification	IPb	2N+1IPb	15	35	139	89	50		994														YES				1.6
80999382212	2015	YES	VIH		NO	NO	NO	2015	MWM	H	20	19	NonAIDS	2.7	2.7	619.9	619.9	33	997		INNTI	2N+1NN	18	50	99	31	68		372		1.3	YES
80999382214	2012	YES	VIH		NO	NO	YES	2012	MWM	H	28	24	NonAIDS		4.79		586	27	810	SIDEFF	INNTI	2N+1NN	214	91	387	82	305		1455					1.6	YES			NO										4.61
80999382217	2015	NO	VIH		NO	NO	NO	2015	MWM	H	25	23	NonAIDS	3.5	3.5	424.4	424.4	9	267	Simplification	IPb	2N+1IPb	40	21	193	132	61		854		1.3	YES						YES					YES				1.6	1.3
80999382220	2015	YES	VIH		YES	YES	NO	2015	Woman	F	35	33	NonAIDS	4.6	4.6	174.3	174.3	7	196	SIDEFF	IPb	2N+1IPb	22	20	224	182	42		992		2.93	NO		2.4	NO		1.3		YES		1.3	YES			1.3	YES
80999382223	2015	YES	VIH		NO	NO	NO	2015	Woman	F	24	22	NonAIDS	3.3	3.4	417.5	619.1	32	957		INNTI	2N+1NN	2	77	143	64	79		945
80999382224	2015	YES	VIH		YES	NO	NO	2015	MWW	H	42	40	NonAIDS	4.3	4.3	308.8		34	1041	Other	INSTI	2N+1II	2	14	189	173	16		707		2	NO					1.6	YES	YES	330	1.6	YES			1.6	YES		1.6
80999382226	2015	YES	VIH		YES	YES	NO	2015	MWM	H	51	49	AIDS	5.2	5.2	21.3	21.3	3	88	Other	INSTI	2N+1II	43	0			43	0	805															35	5	NO
80999382241	2015	YES	VIH		NO	NO	NO	2015	MWM	H	55	53	NonAIDS	4.8	4.8	436.1	436.1	6	186	Simplification	IPb	2N+1IPb	15	16	185	154	31		1008									YES										1.6
80999382248	2015	YES	VIH		YES	YES	NO	2015	MWW	H	49	47	NonAIDS	4.4	4.4	161.9	161.9	4	152	Other	IPb	2N+1IPb	30	7	329	292	37		999		2.7	NO					2.9	NO	NO									2.6
80999382250	2015	YES	VIH		NO	NO	NO	2015	Woman	F	43	41	NonAIDS	5.2	5.2	399.3	399.3	0	7	SIDEFF	IPb	2N+1IPb	5	13	285	267	18		951								1.8		NO	772	1.3	YES	YES				1.3
80999382259	2015	YES	VIH		YES	YES	NO	2015	Woman	F	46	44	AIDS	4.45	4.45	34.1	34.1	3	80	Simplification	IPb	2N+1IPb	47	12	132	73	59	47	905		1.9	NO						YES							1.3	YES		1.3
80999382260	2001	YES	VIH		YES	YES	NO	2015	Woman	F	40	38	NonAIDS	5.5	5.5	40.8	12	25	754	Other	INSTI	2N+1II	50	8	169	111	58		951		1.8	NO						YES			1.6	YES	NO		1.6	YES	2.5	1.3
80999382262	2015	YES	VIH		YES	YES	NO	2015	MWW	H	67	65	NonAIDS	5.3	5.3	45.2	45.2	11	333	Simplification	IPb	2N+1IPb	7	10	209	192	17		863		3.1	NO		1.9	NO	154	1.6		YES
80999382265	2015	YES	VIH		NO	NO	NO	2015	MWW	H	29	27	NonAIDS	4.5	4.5	544.7	434.2	2	61	SIDEFF	INNTI	2N+1NN	17	21	127	89	38		810					1.3	YES								YES				1.6
80999382269	2015	YES	VIH		YES	NO	NO	2015	MWM	H	20	19	NonAIDS	4.49	4.49	262.1	262.1	4	119	Simplification	IPb	2N+1IPb	23	14	148	111	37		468
80999382276	2015	YES	VIH		YES	YES	NO	2015	MWW	H	48	46	NonAIDS	4.9	4.9	4.7	4.7	3	75	Other	IPb	2N+1IPb	50	23	272	199	73		880	46	2.13	NO		5.4	NO						1.3	YES	YES		1.3	YES	1.3
80999382277	2015	YES	VIH		YES	NO	NO	2015	MWW	H	26	24	NonAIDS	3.8	3.8	277.6	277.6	19	569	Other	INNTI	2N+1NN	9	13	273	251	22		887									YES										1.4
80999382282	2015	YES	VIH		NO	NO	NO	2015	Woman	F	28	26	NonAIDS	3.6	3.6	491.7	491.7	5	164	Simplification	IPb	2N+1IPb	37	12	168	119	49		960		1.7	NO		1.3	YES		1.3	YES	YES						1.3	YES		1.3
80999382283	2015	YES	VIH		NO	NO	NO	2015	Woman	F	39	37	NonAIDS	3.5	3.5	377.1	377.1	1	22	Simplification	Other	2N+1IPb+1II	10	0	23	13	10		895		1.3	YES
80999382285	2015	YES	VIH		ND	ND	NO	2014	MWW	H	79	76	NonAIDS		4.8		646.3	32	980	Simplification	IPb	2N+1IPb	356	0	475	119	356		770																1.6	YES
80999382286	2015	NO	VIH		NO	NO	NO	2015	MWM	H	24	24	NonAIDS	4.2	4.2	608.1	466.8	31	945		INNTI	2N+1NN	20	26			46		40
80999382287	2015	YES	VIH		YES	YES	NO	2014	MWW	H	23	20	NonAIDS	5.35	5.8	87	31.3	32	962		IPb	2N+1IPb	212	9	402	181	221		863								1.3		YES
80999382326	2015	YES	VIH		YES	YES	NO	2015	MWW	H	41	40	NonAIDS	4.9	4.9	163.8	163.8	31	922		INNTI	2N+1NN	12	14	277	251	26		554		3.2	NO				236	1.5	YES	YES						3.8	NO		1.5
80999382338	2012	YES	VIH		NO	NO	NO	2012	Woman	F	55	50	NonAIDS	4.48	4.13	364	259	18	536	Simplification	IPb	2N+1IPb	42	68	264	154	110		1812															482	1.6	YES
80999382348	2015	NO	VIH		YES	NO	NO	2015	MWM	H	17	17	NonAIDS	4.8	4.8	210	210	30	906		IPb	2N+1IPb	55	16			71		167									NO										1.7
80999382349	2015	YES	VIH		NO	NO	NO	2015	MWW	H	57	55	NonAIDS	3.2	4.2	544.9	235.6	27	794		INNTI	2N+1NN	0	135	243	108	135		639		1.9	NO						NO			1.3	YES						1.9
80999382350	2015	YES	VIH		YES	YES	NO	2015	MWW	H	62	60	AIDS	5.4	5.4	8.1	8.1	0	24	Other	IPb	2N+1IPb	56	14	204	134	70	63	742								1.3		YES
80999382359	2015	YES	VIH		NO	NO	NO	2015	MWM	H	33	31	NonAIDS	4.7	4.7	536.4	536.4	3	78	SIDEFF	INNTI	2N+1NN	19	9	203	175	28		794					1.3	YES										1.3	YES
80999382362	2015	YES	VIH		ND	ND	NO	2015	Woman	F	70	68	NonAIDS		5.6		67.9	13	407	Simplification	IPb	2N+1IPb	131	8	416	277	139		793					2.4	NO		1.3	NO	YES		1.6	YES			1.6	YES		3.64
80999382369	2015	NO	VIH		NO	NO	NO	2015	Woman	F	35	35	NonAIDS	4.4	4.4	505.1		30	888		INNTI	2N+1NN	14	13			27		35
80999382372	2015	YES	VIH		NO	NO	NO	2015	MWW	H	26	24	NonAIDS	3.5	3.5	562.2	562.2	30	886		INNTI	2N+1NN	6	14	47	27	20		818
80999382373	2015	YES	VIH		YES	YES	NO	2015	MWW	H	45	43	NonAIDS	3.5		43.9	43.9	10	307	Simplification	IPb	2N+1IPb	16	10	360	334	26		702								1.3		YES				YES		1.6	YES	1.6
80999382374	2015	YES	VIH		YES	YES	NO	2015	Woman	F	43	41	NonAIDS	4.9	4.9	75	75	1	39	Failure	INNTI	2N+1NN	0	26	180	154	26		877		3.6	NO						YES			1.3	YES			1.3	YES		1.3
80999382390	2015	NO	VIH		NO	NO	NO	2015	MWM	H	37	36	NonAIDS	4.6	4.6	557.5	557.5	3	92	Simplification	IPb	2N+1IPb	16	21			37		145					1.7	NO
80999382391	2015	YES	VIH		YES	NO	NO	2015	MWW	H	29	27	NonAIDS	4.1	4.1	322.2	322.2	29	859		INNTI	2N+1NN	1	14	118	103	15		826		1.9	NO													1.3	YES
80999382392	2015	YES	VIH		NO	NO	YES	2015	MWW	H	27	25	AIDS	5.3	5.3	10	12.9	29	854		IPb	2N+1IPb	2	18	115	95	20	14	622		2.7	NO		1.6	YES		1.6		YES		1.6	YES		817	1.3	YES
80999382398	2015	YES	VIH		NO	NO	NO	2015	MWW	H	34	32	NonAIDS	4.5	4.5	716.5	716.5	29	882	Other	INNTI	2N+1NN	13	56	158	89	69		756					1.3	YES								YES				1.3
80999382406	2015	YES	VIH		YES	YES	NO	2015	MWW	H	50	48	AIDS	5.1	5.1	28.2	28.2	11	336	Simplification	IPb	2N+1IPb	14	0	314	300	14	8	834		3.3	NO					1.7	NO	NO									1.7
80999382417	2015	YES	VIH		YES	YES	NO	2015	MWW	H	38	36	AIDS	6.6	6.6	103.4	103.4	8	234	Failure	INSTI	2N+1II	0	37	584	547	37	0	829																1.3	YES
80999382420	2015	YES	VIH		YES	YES	NO	2015	Woman	F	36	34	AIDS	5.4	5.4	81.7	81.7	5	148	Simplification	IPb	2N+1IPb	6	13	148	129	19	61	832		3.2	NO	258	2.3	NO		1.3		YES		1.3	YES
80999382421	2015	YES	VIH		YES	YES	NO	2015	MWW	H	57	55	AIDS	5.4	5.4	41.3	41.3	16	489	Simplification	IPb	2N+1IPb	0	8	467	459	8	0	742		2.3	NO									1.3	YES	YES				1.3
80999382426	2015	YES	VIH		NO	NO	NO	2015	Woman	F	42	40	NonAIDS	3.6	3.6	359.1	359.1	7	188	Simplification	IPb	2N+1IPb	8	14	83	61	22		776		1.5	YES						YES										1.3
80999382434	2014	YES	VIH		YES	YES	NO	2014	MWW	H	54	51	AIDS	5.5	4.9	23.4	23.4	19	604	Simplification	IPb	2N+1IPb	4	30	215	181	34	0	1268		2.4	NO		1.6	YES		1.3		YES				YES				1.3
80999382440	2015	YES	VIH		NO	NO	NO	2015	MWM	H	57	55	NonAIDS	3.1	3.1	666.9	666.9	8	242	SIDEFF	INNTI	2N+1NN	12	9	140	119	21		814		1.7	NO											YES				1.3
80999382443	2015	YES	VIH		NO	NO	NO	2015	MWW	H	25	23	NonAIDS	4.8	4.8	764.4	764.4	0	11	SIDEFF	INNTI	2N+1NN	8	9	48	31	17		740	744	1.6	YES					1.3		YES	867	2.1	NO	NO		1.72	NO	2.1
80999382444	2015	YES	VIH		YES	YES	NO	2015	MWW	H	50	48	NonAIDS	5.82	5.82	180.4	180.4	7	217	Simplification	IPb	2N+1IPb	45	18	882	819	63		760		3.5	NO						NO					NO				1.9	2.2
80999382449	2015	YES	VIH		YES	YES	NO	2015	MWW	H	59	57	NonAIDS	5.57	5.57	10	10	1	32	Other	INSTI	2N+1II	8	14	53	31	22		660		1.3	YES					1.3		YES		3	NO	NO		1.3	YES	3
80999382466	2015	YES	VIH		YES	YES	NO	2015	MWW	H	31	29	AIDS	5.4	5.4	67.7		17	495	Simplification	IPb	2N+1IPb	0	43	224	181	43	0	778		1.84	NO		1.5	YES		1.6		YES				YES	209	1.6	YES	1.3
80999382483	2015	YES	VIH		YES	NO	NO	2015	MWW	H	28	26	NonAIDS	5	5	222	222	26	779		INSTI	2N+1II	6	10	473	457	16		693		1.9	NO		1.3	YES
80999382492	2015	NO	VIH		YES	YES	NO	2015	MWM	H	40	39	AIDS	5.3	5	94.7	87	1	45	Other	INSTI	2N+1II	3	18			21	0	213									NO										5.5
80999382511	2015	YES	VIH&HEP	VHC	NO	NO	YES	2015	MWM	H	20	18	NonAIDS	5.4	5.4	565.9	565.9	5	179	Simplification	INSTI	2N+1II	13	2	65	50	15		496				749	1.6	YES		1.6	YES	YES	551	1.6	YES						1.6
80999382520	2015	NO	VIH		YES	YES	NO	2015	MWM	H	47	47	AIDS	5	5	1.9	1.9	25	752		IPb	2N+1IPb	3	10			13	3	21
80999382524	2015	NO	VIH		NO	NO	YES	2015	MWM	H	23	22	NonAIDS	6.1	6.1	389.6	389.6	25	749		IPb	2N+1IPb	6	5			11		121
80999382527	2015	YES	VIH		NO	NO	NO	2015	MWM	H	26	24	NonAIDS	5.2	5.2	443	443	25	782	Other	INSTI	2N+1II	5	22	92	65	27		734								1.3		YES
80999382530	2015	NO	VIH		YES	YES	NO	2015	MWM	H	25	24	NonAIDS	5.4	5.4	191.9	191.9	24	720		IPb	2N+1IPb	19	27	304	258	46		300		2.9	NO		2.1	NO		1.6		YES
80999382531	2015	YES	VIH		YES	NO	NO	2015	MWW	H	34	32	NonAIDS	4.8	4.8	214.6	214.6	17	523	Simplification	IPb	2N+1IPb	33	21	402	348	54		709		2.6	NO											YES				1.6
80999382532	2015	YES	VIH		YES	YES	NO	2015	MWW	H	66	64	NonAIDS	5.73	5.73	11	11	3	84	SIDEFF	IPb	2N+1IPb	16	29	158	113	45		672		2.2	NO					1.3		YES
80999382536	2015	YES	VIH		NO	NO	NO	2015	MWM	H	25	23	NonAIDS	4.5	4.5	1000.3	1000.3	14	406		INNTI	2N+1NN	9	334			343		649
80999382561	2016	YES	VIH		NO	NO	NO	2015	MWM	H	34	32	NonAIDS	3.1	3.1	599	599	7	190	Simplification	IPb	2N+1IPb	66	20	206	120	86		595																1.3	YES
80999382570	2016	NO	VIH		YES	YES	NO	2015	MWM	H	29	27	NonAIDS	4.7	4.7	185.8	185.8	23	683		IPb	2N+1IPb	21	36	306	249	57		714
80999382571	2016	YES	VIH		NO	NO	NO	2015	MWM	H	36	34	NonAIDS	4.6	4.1	411	294.9	1	56	Simplification	INSTI	2N+1II	20	111	168	37	131		553									YES					NO				1.78	1.6
80999382596	2016	YES	VIH		NO	NO	NO	2015	Woman	F	70	68	NonAIDS	4.5	4.5	432.6	432.6	3	112	Simplification	INSTI	2N+1II	35	42	181	104	77		604								1.6	YES	YES				YES				1.6	1.6
80999382791	2016	NO	VIH		ND	ND	NO	2010	Woman	F	46	40	NonAIDS		1.62		297.4	16	467		INNTI	2N+1NN	2269	21			2290		36
80999383405	2011	YES	VIH		YES	NO	NO	2011	Woman	F	29	24	NonAIDS	4.61	4.61	254.9	305.3	12	380	SIDEFF	IPb	2N+1IPb	6	14	110	90	20		1822		2.67	NO		1.6	YES		1.6		YES		1.6	YES	YES				1.6
80999383407	2011	NO	VIH		YES	YES	NO	2011	MWW	H	37	36	AIDS	6.07	6.07	18.2	18.2	75	2254		IPb	2N+1IPb	0	19			19	1	243		4.6	NO						NO										3.57
80999383412	2010	NO	VIH		YES	YES	NO	2010	Woman	F	62	57	NonAIDS	5.14	5.14	48.8	48.8	23	704	Other	IPb	2N+1IPb	3	16	447	428	19		1848															319	1.3	YES
80999383433	2011	YES	VIH		YES	YES	NO	2011	Woman	F	59	57	AIDS	6.39	6.34	57.2	85.6	61	1843		IPb	2N+1IPb	0	357			357	0	433									NO										6.27
80999383442	2012	NO	VIH		NO	NO	NO	2010	Woman	F	64	57	NonAIDS	4.17	4.05	511	310.6	62	1861		INNTI	2N+1NN	1009	14	1458	435	1023		1555
80999383447	2012	YES	VIH		YES	YES	NO	2012	Woman	F	42	37	NonAIDS	4.73	5.4	32.8	53	5	171	Simplification	IPb	2N+1IPb	1	26	83	56	27		1899	127	2.34	NO						YES			1.6	YES						1.6
80999383448	2012	YES	VIH		YES	NO	NO	2012	MWM	H	31	27	NonAIDS	4.44	4.44	281.7	281.7	11	328	Simplification	INNTI	2N+1NN	10	10	80	60	20		1346		1.73	NO				335	1.6	YES	YES					318	3.3	NO		1.6
80999383468	2010	YES	VIH		YES	YES	NO	2010	MWW	H	57	50	NonAIDS	5.47	5.47	190.3	279.1	10	284	Simplification	IPb	2N+1IPb	11	8	175	156	19		2815									NO										1.67
80999383480	2012	YES	VIH		NO	NO	NO	2012	MWW	H	42	38	NonAIDS	4.3	4.29	468.9	391.2	59	1795		INNTI	2N+1NN	15	252	523	256	267		1559		1.81	NO
80999383482	2011	NO	VIH		YES	NO	NO	2011	Woman	F	43	37	NonAIDS	4.63	5.3	256.3	4.9	48	1441		IPb	2N+1IPb	0	1072	1232	160	1072		2261
80999383484	2012	YES	VIH		YES	YES	NO	2012	MWW	H	78	73	AIDS	5.14	5.14	38.8	38.8	8	248	Failure	INNTI	2N+1NN	0	17	283	266	17	0	1679		2.25	NO					1.63	NO	NO						1.6	YES		1.63
80999383529	2011	YES	VIH		NO	NO	NO	2011	Woman	F	36	33	NonAIDS	1.86	1.86	562.3	562.3	3	76	Other	IPb	2N+1IPb	0	1	48	47	1		1289																2.02	NO
80999383560	2011	NO	VIH		ND	ND	NO	2011	MWW	H	52	46	AIDS		4.6		39	6	164		INSTI	2N+1II	0	2146	2247	101	2146	2145	2255
80999383562	2011	YES	VIH		YES	NO	NO	2011	MWW	H	64	58	NonAIDS	3.47	3.47	314.8	314.8	22	664	SIDEFF	IPb	2N+1IPb	18	23	221	180	41		2237		2.57	NO					1.6		YES				YES				1.6
80999383625	2011	NO	VIH		YES	YES	NO	2011	MWW	H	62	56	AIDS	5.33	5.33	7	7	76	2299		INNTI	2N+1NN	3	10			13	13	2149
80999383662	2010	YES	VIH		YES	YES	NO	2010	MWM	H	50	43	NonAIDS	4.98	4.98	9	9	7	215	Simplification	IPb	2N+1IPb	11	0	212	201	11		2734												1.6	YES	YES				1.6
80999383670	2011	YES	VIH		YES	YES	NO	2011	MWW	H	44	41	AIDS	5.38	5.38	14.6	14.6	33	1030	Simplification	IPb	2N+1IPb	2	23	167	142	25	22	1093									YES										1.6
80999383676	2010	NO	VIH		YES	YES	NO	2010	MWW	H	53	52	AIDS	4.98	4.98	3	3	0	10	SIDEFF	INNTI	2N+1NN	0	37	180	143	37	0	298									YES										1.6
80999383683	2010	NO	VIH&HEP	VHB	YES	YES	NO	2010	MWM	H	30	23	NonAIDS	6.96	6.96	189.3	189.3	22	682	Other	IPb	2N+1IPb	3	13	2489	2473	16		2557
80999383686	2011	YES	VIH		NO	NO	NO	2011	Woman	F	53	48	NonAIDS	3.56	3.9	732.1	761.5	40	1193		INNTI	2N+1NN	2	1227	1458	229	1229		1969		2.1	NO
80999383694	2013	YES	VIH		YES	YES	NO	2013	MWW	H	46	45	AIDS	5.3	5.4	279	320.2	5	159	Failure	INNTI	2N+1NN	0	79			79	0	506									NO										3.2
80999383699	2011	YES	VIH		NO	NO	NO	2011	Woman	F	60	54	NonAIDS	4.19	4.19	449.6	449.6	29	888	SIDEFF	IPb	2N+1IPb	1	31	182	150	32		2352		2.12	NO		2.12	NO			YES										1.6
80999383768	2010	YES	VIH		YES	YES	NO	2010	Woman	F	44	37	NonAIDS	4.51	4.51	79.4	79.4	21	651	Other	IPb	2N+1IPb	2	16	158	140	18		2834		2.63	NO				136	1.67	NO	NO		2.29	NO	NO		4.93	NO	2.29	1.67
80999383778	2011	YES	VIH		YES	YES	NO	2011	MWW	H	58	52	NonAIDS	4.26	4.26	161.3	161.3	3	91	Simplification	INNTI	2N+1NN	30	42	154	82	72		2437		2.16	NO		1.6	YES		1.6		YES						1.6	YES
80999383800	2011	YES	VIH		NO	NO	NO	2011	MWW	H	23	17	NonAIDS	3.32	3.27	1325.3	765.1	74	2251		Other	2N	21	99	167	47	120		2067					1.6	YES			YES										1.6
80999383814	2012	NO	VIH		YES	YES	NO	2012	MWW	H	49	49	AIDS	5.38	5.38	132	132	4	116	Simplification	IPb	2N+1IPb	0	27	117	90	27	0	235				243	1.6	YES
80999383852	2012	NO	VIH		NO	NO	NO	2012	MWW	H	34	29	NonAIDS	3.69	3.69	402.6	402.6	12	363	Simplification	IPb	2N+1IPb	15	0	171	156	15		1927									YES										1.3
80999383860	2012	YES	VIH		YES	NO	NO	2012	Woman	F	41	36	NonAIDS	4.31	4.31	234.7	234.7	0	8	Other	IPb	2N+1IPb	2	0	247	245	2		1871					4.16	NO		1.59	YES	YES		2.5	NO	NO		1.6	YES	2.5	1.59
80999383872	2010	YES	VIH		YES	YES	NO	2010	Woman	F	43	36	AIDS	5.58	5.58	86	86	5	160	Other	IPb	2N+1IPb	35	0	755	720	35	385	2623				169	1.69	NO								NO		1.61	NO	4.07
80999383881	2012	YES	VIH		NO	NO	NO	2012	Woman	F	57	52	NonAIDS	2.7	2.2	540	950.8	1	30	SIDEFF	IPb	2N+1IPb	113	332	467	22	445		1545		1.6	YES	1452	1.6	YES						1.6	YES			1.6	YES
80999383899	2010	YES	VIH		YES	YES	NO	2010	Woman	F	56	49	NonAIDS	4.49	4.49	102.9	102.9	1	35	SIDEFF	IPb	2N+1IPb	7	21	148	120	28		2527
80999383905	2011	YES	VIH		NO	NO	NO	2011	Woman	F	55	49	NonAIDS	5.02	4.6	550.3	446	3	92	Other	IPb	2N+1IPb	0	162	195	33	162		2486		1.6	YES						YES										1.6
80999383921	2010	YES	VIH		YES	NO	NO	2010	Woman	F	50	43	NonAIDS	5.15	5.15	225.5	225.5	83	2528	Other	IPb	2N+1IPb	8	61	250	181	69		2589		2.76	NO					1.6		YES		1.6	YES			1.6	YES
80999383931	2012	YES	VIH		YES	YES	NO	2012	MWW	H	64	60	AIDS	5.83	5.8	296.9	308.6	9	266	Simplification	INNTI	2N+1NN	7	56	468	405	63	24	1706									NO					YES				1.6	2.97
80999383981	2011	YES	VIH		NO	NO	NO	2011	MWW	H	24	18	NonAIDS	4.12	3.47	432.3	306.9	2	60	SIDEFF	IPb	2N+1IPb	10	183	254	61	193		2447									NO										3.47
80999383995	2012	YES	VIH&HEP	VHB	ND	ND	NO	2011	Woman	F	66	60	NonAIDS		6.11		59.6	9	286	Other	IPb	2N+1IPb	322	14	581	245	336		1895				167	2	NO
80999384007	2012	YES	VIH		YES	NO	NO	2012	MWW	H	49	44	AIDS	4.85	4.86	423.4	254.3	5	155	Other	INNTI	2N+1NN	1	85	545	459	86	9	1722		3.01	NO									2.1	NO	NO				2.4
80999384016	2012	YES	VIH		NO	NO	NO	2012	MWM	H	26	21	NonAIDS	4.29	4.22	456.3	549.1	62	1861		INNTI	2N+1NN	0	61	75	14	61		1597									YES			1.6	YES						1.6
80999384045	2010	YES	VIH		YES	YES	NO	2010	Woman	F	59	52	AIDS	5.84	5.84	25	25	92	2798		IPb	2N+1IPb	35	14	183	134	49	22	2478									NO		242	4.93	NO						1.67
80999384059	2010	YES	VIH		YES	YES	NO	2010	MWW	H	43	36	NonAIDS	4.98	4.98	51.7	51.7	5	142	Simplification	IPb	2N+1IPb	4	41	179	134	45		2830									NO		215	1.6	YES						1.67
80999384072	2012	YES	VIH		ND	ND	NO	2010	MWW	H	48	43	NonAIDS		4.89		157.9	36	1070	Simplification	IPb	2N+1IPb	814	79	962	69	893		1149		2.77	NO													1.6	YES
80999384081	2012	NO	VIH		YES	YES	NO	2012	Woman	F	35	30	NonAIDS	4.16		85.7	85.7	0	3	Other	Other	2N+1IPb+1II	0	0	165	165	0		1672								1.6	YES	YES									1.6
80999384084	2013	YES	VIH		NO	NO	NO	2013	MWW	H	58	54	NonAIDS	4.96	4.96	824	824	0	15	SIDEFF	INNTI	2N+1NN	8	36	286	242	44		1512					2.5	NO		2		NO
80999384099	2010	YES	VIH		YES	NO	NO	2010	MWW	H	45	38	NonAIDS	4.17	4.19	211	211	93	2805		INNTI	2N+1NN	19	0	70	51	19		2753														NO				1.86
80999384107	2012	YES	VIH		YES	NO	NO	2012	Woman	F	65	60	NonAIDS	4.61	4.58	294.3	321.9	0	2	Other	INNTI	2N+1NN	28	67	223	128	95		1841	399	2.55	NO
80999384129	2012	YES	VIH		YES	YES	NO	2012	MWW	H	55	50	AIDS	4.17	4.16	98.6	94	55	1661		INSTI	2N+1II	11	227	297	59	238	271	1863		2.2	NO				57	1.6		YES						1.6	YES
80999384154	2011	YES	VIH		NO	NO	NO	2011	MWW	H	38	32	NonAIDS	2.23	2.23	672.1	672.1	29	859	Failure	INNTI	2N+1NN	12	198	283	73	210		2204														YES		1.6	YES	1.6
80999384157	2011	YES	VIH		NO	NO	NO	2011	Woman	F	41	35	NonAIDS	4.86	4.86	354.5	354.5	3	85	Other	IPb	2N+1IPb	8	4	302	290	12		2243		2.39	NO													1.6	YES
80999384161	2012	YES	VIH		YES	YES	NO	2012	MWW	H	64	59	NonAIDS	6.47	6.47	53.5	53.5	34	1046	Simplification	IPb	2N+1IPb	35	22	639	582	57		1967		3.9	NO		2.9	NO						2.1	NO			1.9	NO
80999384185	2010	YES	VIH		YES	NO	NO	2010	Woman	F	54	47	NonAIDS	5.21	5.21	244.5	244.5	51	1535	Simplification	IPb	2N+1IPb	2	48	148	98	50		2654		2.84	NO		1.6	YES		1.6		YES				YES		1.6	YES	1.6
80999384196	2010	YES	VIH		YES	YES	NO	2010	MWW	H	51	44	NonAIDS	5.48	5.48	105.3	105.3	18	544	Other	IPb	2N+1IPb	0	22	163	141	22		2807		3.11	NO											YES				1.6
80999384223	2011	YES	VIH		YES	YES	NO	2011	MWW	H	31	25	AIDS	4.85	4.85	34.2	34.2	73	2226	Simplification	IPb	2N+1IPb	0	22	189	167	22	0	2257		2.56	NO				234	1.6	YES	YES				YES				1.6	1.6
80999384229	2010	YES	VIH&HEP	VHB	YES	YES	NO	2010	MWW	H	56	49	AIDS	4.66	4.66	11.9	11.9	46	1397	Other	IPb	2N+1IPb	0	31	94	63	31	0	2575								1.6		YES		3.31	NO			1.6	YES
80999384239	2011	YES	VIH		YES	YES	NO	2011	Woman	F	57	53	NonAIDS	5.98	4.33	75.7	75.7	39	1188	Other	INSTI	2N+1II	27	10	65	28	37		1516		1.6	YES		1.6	YES		1.6		YES				YES		1.6	YES	1.6
80999384257	2012	NO	VIH		NO	NO	NO	2012	Woman	F	40	35	NonAIDS	3.86	4.1	436	374	3	81		INNTI	2N+1NN	0	2004	2037	33	2004		2039		1.6	YES		1.6	YES
80999384268	2012	YES	VIH		YES	NO	NO	2012	MWW	H	68	63	NonAIDS	4.44	4.44	272.2	272.2	11	347	SIDEFF	IPb	2N+1IPb	20	58	172	94	78		1982					1.6	YES			YES			1.6	YES						1.6
80999384285	2012	YES	VIH&HEP	VHB	YES	NO	NO	2012	MWW	H	41	38	NonAIDS	4.37	4.37	250.3	250.3	0	11	SIDEFF	INNTI	2N+1NN	2	42	191	147	44		1286		2.42	NO				518	1.6	YES	YES						1.6	YES		1.6
80999384300	2011	YES	VIH		YES	YES	NO	2011	MWM	H	23	20	AIDS	5.21	5.21	3.7	3.7	22	656	Simplification	IPb	2N+1IPb	16	37	185	132	53	0	1169		2.55	NO		2.26	NO			YES			1.6	YES						1.3
80999384307	2011	YES	VIH		YES	YES	NO	2011	MWW	H	54	48	NonAIDS	2.78		1.7	2	78	2365		IPb	2N+1IPb	9	10	385	366	19		2232		2.78	NO					2.03		NO		1.6	YES
80999384333	2013	YES	VIH		NO	NO	NO	2013	Woman	F	56	52	NonAIDS	2.38	3.9	731	553.2	40	1207		INNTI	2N+1NN	16	588	721	117	604		1755		1.7	NO
80999384355	2010	NO	VIH		YES	NO	NO	2010	MWW	H	34	33	NonAIDS	5.45	5.45	301.1	301.1	87	2638		IPb	2N+1IPb	6	25	114	83	31		221		2.73	NO		1.6	YES		1.6		YES
80999384357	2000	NO	VIH		YES	NO	NO	2010	MWW	H	71	64	NonAIDS	4.68	3.7	302.4	99.7	24	744	Failure	INNTI	2N+1NN	22	1943	2131	166	1965		2721		2.9	NO					1.3		YES
80999384363	2013	YES	VIH		NO	NO	NO	2013	Woman	F	34	30	NonAIDS	3.98	3.98	759	759	6	180	Other	IPb	2N+1IPb	7	22	76	47	29		1763								1.6	YES	YES				YES		1.6	YES	1.6	1.6
80999384393	2010	YES	VIH		YES	NO	NO	2010	MWW	H	38	31	NonAIDS	5.95	5.95	202.5	202.5	87	2636		IPb	2N+1IPb	7	36	351	308	43		2623		3.53	NO											YES				1.6
80999384395	2011	YES	VIH		YES	YES	NO	2011	MWM	H	32	27	NonAIDS	4.72	4.72	141.5	141.5	78	2351		IPb	2N+1IPb	0	15	403	388	15		1669
80999384403	2010	NO	VIH		NO	NO	NO	2010	MWW	H	40	40	NonAIDS	5.06	5.88	355.2	68.9	1	14	SIDEFF	Other	1NN+1IPb	2	117			119		172									NO										5.31
80999384406	2010	YES	VIH		NO	NO	YES	2010	MWM	H	46	39	NonAIDS	4.21	3.4	734.5	913.7	19	565		INNTI	2N+1NN	150	2022	2263	91	2172		2575		1.4	YES		1.6	YES						1.6	YES			1.6	YES
80999384446	2011	NO	VIH		ND	ND	NO	2011	MWW	H	69	63	AIDS		4.9		13	11	341	Simplification	IPb	2N+1IPb	8	1742	1820	70	1750	1730	2414		2.4	NO					1.6		YES
80999384480	2010	YES	VIH		NO	NO	NO	2010	Woman	F	45	38	NonAIDS	4.21	4.11	946.8	1141.1	1	54	Other	IPb	2N+1IPb	7	72	106	27	79		2602		1.67	NO											NO				3.32
80999384483	2013	NO	VIH		NO	NO	NO	2013	MWW	H	37	37	NonAIDS	3	3	792.7	792.7	60	1803		INSTI	2N+1II	5	7	33	21	12		76		1.6	YES
80999384502	2013	YES	VIH&HEP	VHB	NO	NO	NO	2013	Woman	F	34	30	NonAIDS	3.1	3.7	539.9	556	1	49	SIDEFF	INNTI	2N+1NN	2	237	258	19	239		1670									NO			1.6	YES			1.6	YES		3.7
80999384520	2013	YES	VIH		YES	YES	NO	2013	MWW	H	59	55	NonAIDS	5.2	5.2	118.6	118.6	43	1315	Simplification	IPb	2N+1IPb	13	24	224	187	37		1592		3	NO					1.6		YES		2.3	NO	NO				2.8
80999384524	2013	NO	VIH		YES	YES	NO	2013	Woman	F	50	50	AIDS	5.9	5.9	27	27	53	1599		INNTI	2N+1NN	20	24			44	20	49
80999384531	2013	YES	VIH&HEP	VHB	YES	YES	NO	2013	MWW	H	58	54	NonAIDS	3.9	3.8	169	190.9	23	697	Failure	INNTI	2N+1NN	7	242	284	35	249		1564		1.6	YES		1.6	YES		1.6		YES		1.6	YES			1.6	YES
80999384542	2013	YES	VIH		YES	YES	NO	2013	MWW	H	62	58	NonAIDS	4.8	4.8	131.3	207	11	336	SIDEFF	INNTI	2N+1NN	0	31	192	161	31		1388		2.2	NO						YES					YES				1.6	1.6
80999384545	2013	YES	VIH		YES	NO	NO	2013	MWW	H	54	50	NonAIDS	4.1	4.1	217	217	52	1566		INNTI	2N+1NN	0	27	117	90	27		1462				264	1.6	YES					428	1.6	YES		465	1.6	YES
80999384549	2013	NO	VIH		YES	YES	NO	2013	MWW	H	60	56	NonAIDS	5.1	5.1	83.7	83.7	1	30	Other	INNTI	2N+1NN	0	14			14		1564
80999384564	2013	NO	VIH		NO	NO	NO	2013	MWM	H	16	16	NonAIDS	2.5	2.5	749.2	749.2	0	4	Other	Other	2N	18	12			30		161
80999384568	2013	YES	VIH		NO	NO	NO	2013	Woman	F	69	66	NonAIDS	4.4	4.4	460.6	263.2	46	1391		INNTI	2N+1NN	9	146	209	54	155		1107				534	1.6	YES									899	1.6	YES
80999384569	2013	NO	VIH		ND	ND	NO	2013	Woman	F	47	43	NonAIDS		4.5		333.3	26	792	Simplification	IPb	2N+1IPb	196	749	1039	94	945		1444		2.5	NO		1.3	YES		1.3		YES
80999384572	2013	YES	VIH		YES	NO	NO	2013	MWM	H	35	31	NonAIDS	4	4	317.2	297	7	210	SIDEFF	INNTI	2N+1NN	74	50	257	133	124		1495	335	2.2	NO
80999384583	2013	YES	VIH		NO	NO	NO	2013	Woman	F	39	35	NonAIDS	2.9	4.8	1154	689	37	1117		IPb	2N+1IPb	32	374	516	110	406		1457		2.7	NO				891	1.3		YES				NO				4.8
80999384588	2013	YES	VIH		YES	NO	NO	2013	Woman	F	48	45	NonAIDS	3.3	4.3	297.5	186.6	43	1310		INNTI	2N+1NN	7	170	434	257	177		819
80999384589	2013	YES	VIH		NO	NO	YES	2011	MWM	H	32	26	NonAIDS	4.7	5.3	1154	687.5	1	44	Failure	INNTI	2N+1NN	909	250	1539	380	1159		1395		3.1	NO									1.3	YES			1.6	YES
80999384596	2014	NO	VIH		ND	ND	NO	2014	MWM	H	22	22	NonAIDS	4.5	4.5			46	1393		INNTI	2N+1NN	12	47			59		117
80999384625	2014	YES	VIH		YES	YES	NO	2014	Woman	F	64	61	NonAIDS	5.1	5.1	183.6	183.6	12	370	Simplification	IPb	2N+1IPb	6	19	160	135	25		1273																1.6	YES
80999384626	2014	YES	VIH		YES	YES	NO	2014	MWW	H	46	43	NonAIDS		5	56.4	56.4	21	637	Simplification	IPb	2N+1IPb	107	9	554	438	116		1276				144	5.1	NO
80999384628	2014	YES	VIH		NO	NO	NO	2014	Woman	F	65	62	AIDS	4.7	4.7	405.9	405.9	10	315	SIDEFF	IPb	2N+1IPb	6	26	184	152	32	950	1288									YES					YES	782	1.6	YES	1.3	1.6
80999384631	2014	YES	VIH		YES	NO	NO	2014	Woman	F	42	39	NonAIDS	5	5	216	216	43	1284		IPb	2N+1IPb	7	4	136	125	11		1246		3.5	NO					1.6		YES						1.6	YES
80999384632	2014	YES	VIH		YES	NO	NO	2014	MWW	H	54	51	AIDS	5.1	5.8	233.9	241.3	4	129	Failure	INNTI	2N+1NN	0	88	312	224	88	902	962
80999384636	2014	YES	VIH		NO	NO	NO	2014	Woman	F	47	44	NonAIDS	3.3	2.9	832	915.7	5	148	Failure	Other	2N	1	285	312	26	286		1151		1.6	YES
80999384638	2014	YES	VIH		YES	NO	NO	2014	MWW	H	30	27	NonAIDS	5.4	5.4	217.5	217.5	39	1188		IPb	2N+1IPb	9	69	328	250	78		1112		2.4	NO				447	2.1		NO						1.3	YES
80999384639	2014	YES	VIH		YES	NO	NO	2014	MWW	H	55	52	NonAIDS	5.5	5.5	256.5	256.5	6	170	Simplification	IPb	2N+1IPb	9	6	209	194	15		1219		3.2	NO					1.3		YES		1.3	YES
80999384640	2014	YES	VIH		YES	YES	NO	2014	Woman	F	69	66	NonAIDS	4.9	4.9	157.3	157.3	41	1239		INNTI	2N+1NN	6	13	77	58	19		1121
80999384642	2014	YES	VIH		YES	YES	NO	2014	Woman	F	35	32	AIDS	6	6	37.3	37.3	1	26	SIDEFF	IPb	2N+1IPb	12	6	212	194	18	83	1219		3.8	NO				99	1.6		YES		1.3	YES
80999384643	2014	YES	VIH		ND	ND	NO	2010	Woman	F	30	23	NonAIDS		4.9		330.5	1	36	Simplification	Other	2N+1IPb+1II	1515	3	1614	96	1518		1239	451	2.1	NO		1.6	YES										1.6	YES
80999384647	2014	YES	VIH		YES	NO	NO	2014	MWM	H	39	36	NonAIDS	6.1	6.1	221	221	4	148	Simplification	IPb	2N+1IPb	34	0	131	97	34		1171		2.8	NO	430	1.6	YES		1.7	YES	NO									1.6
80999384649	2014	YES	VIH		YES	NO	NO	2014	MWM	H	29	26	NonAIDS	4.4	4.4	236.2	236.2	40	1195		INNTI	2N+1NN	0	19	145	126	19		1168											470	1.6	YES
80999384650	2014	YES	VIH		NO	NO	NO	2014	Woman	F	50	47	NonAIDS	4.7	4.7	375	375	31	954	Failure	INSTI	2N+1II	18	0	60	42	18		1195					1.6	YES		1.6		YES		1.6	YES
80999384651	2014	YES	VIH		NO	NO	NO	2013	Woman	F	30	26	NonAIDS	1.6	2.6	674	765.1	7	203	Simplification	IPb	2N+1IPb	456	12	15	-453	468		1191		1.6	YES					1.6		YES						1.3	YES
80999384656	2014	YES	VIH		NO	NO	NO	2014	MWM	H	22	19	NonAIDS	4.6	4.5	407.8	407.8	15	446	Other	INNTI	2N+1NN	1	182	501	318	183		1190														NO				1.9
80999384662	2014	NO	VIH		YES	YES	NO	2014	MWW	H	70	68	AIDS	5.7	4.9	33	19	18	556	Other	IPb	2N+1IPb	0	15			15	0	571
80999384665	2014	YES	VIH		ND	ND	NO	2013	MWW	H	60	56	NonAIDS		6.6		86.7	16	473	Other	IPb	2N+1IPb	355	9	598	234	364		1015														NO	82	5.4	NO	6.6
80999384666	2014	YES	VIH		YES	NO	NO	2014	Woman	F	42	39	NonAIDS	3.6	3.7	219.6	234.4	8	266	Simplification	IPb	2N+1IPb	34	13	130	83	47		946					1.6	YES			YES										1.6
80999384667	2014	NO	VIH		YES	YES	NO	2014	MWW	H	20	17	NonAIDS	5.8	5.8	117.3	117.3	37	1109		INSTI	2N+1II	1	28	818	789	29		879		3.2	NO
80999384668	2014	YES	VIH		YES	NO	NO	2014	Woman	F	37	34	NonAIDS	4.5	4.5	208.5	208.5	5	143	SIDEFF	INSTI	2N+1II	0	56	157	101	56		1106														YES		2.1	NO	1.6
80999384684	2015	NO	VIH		YES	YES	NO	2014	MWW	H	43	40	NonAIDS	4.9	6.2	69	14.8	2	47		IPb	2N+1IPb	36	1028	1083	19	1064		1061
80999384691	2015	NO	VIH		ND	ND	NO	2014	MWM	H	23	20	NonAIDS		2.6		406.7	15	445		INNTI	2N+1NN	173	617	832	42	790		1058								1.3	NO	YES									2.6
80999384697	2015	NO	VIH		YES	YES	NO	2015	MWW	H	66	64	AIDS	4.3	4.3	90	90	29	881	Other	INSTI	2N+1II	7	20	125	98	27	886	901		1.6	YES		1.3	YES
80999384709	2015	YES	VIH		NO	NO	NO	2015	MWW	H	57	55	NonAIDS	4.2	4.2	368	368	1	27	SIDEFF	INSTI	2N+1II	15	16	181	150	31		981								1.6	YES	YES									1.6
80999384710	2015	YES	VIH		YES	NO	NO	2015	MWW	H	63	61	NonAIDS	4.7	4.7	263.4	263.4	14	415	Simplification	INSTI	2N+1II	2	13	199	184	15		672		2.2	NO					1.6		YES
80999384713	2015	YES	VIH		YES	NO	NO	2015	Woman	F	58	56	NonAIDS	4.8	4.8	306.8	306.8	30	903		INNTI	2N+1NN	60	79	246	107	139		937
80999384715	2015	YES	VIH		YES	NO	NO	2015	MWW	H	63	61	NonAIDS	4.2	4.2	279.4	279.4	30	913		IPb	2N+1IPb	13	58	315	244	71		903												1.6	YES
80999384719	2015	YES	VIH&HEP	VHB	YES	YES	NO	2015	Woman	F	46	44	NonAIDS	5.3	2.1	32.1	179	12	378	Simplification	IPb	2N+1IPb	2	127	171	42	129		764									YES						144	1.6	YES		1.6
80999384725	2015	YES	VIH		NO	NO	NO	2015	MWM	H	33	32	NonAIDS	4.8	4.4	352.8	202	13	376		INNTI	2N+1NN	5	548			553		548
80999384732	2015	YES	VIH		YES	YES	NO	2015	Woman	F	44	42	NonAIDS	5.5	4.3	115.5	61.8	27	819		IPb	2N+1IPb	16	60	416	340	76		797					3.8	NO			NO										3.8
80999384739	2015	YES	VIH		YES	YES	NO	2015	Woman	F	38	36	NonAIDS	5.2	5.2	194	194	8	259	Failure	INSTI	2N+1II	2	51	89	36	53		723	314	1.6	YES				454	2.9		NO
80999384741	2015	YES	VIH		NO	NO	NO	2015	Woman	F	62	60	NonAIDS	3.8	3.8	633.5	633.5	27	816		INNTI	2N+1NN	17	38	144	89	55		843					1.6	YES	657	1.3		YES		1.6	YES
80999384742	2015	YES	VIH		NO	NO	NO	2015	Woman	F	45	44	NonAIDS	4.1	4.1	444.6	444.6	27	805		INSTI	2N+1II	2	46	155	107	48		370														YES				1.6
80999384744	2015	YES	VIH		YES	NO	NO	2015	Woman	F	52	50	NonAIDS	4.1	4.1	272.2	272.2	26	775		IPb	2N+1IPb	3	69	246	174	72		707		3	NO		1.7	NO		1.3		YES				NO				1.9
80999384746	2015	YES	VIH		NO	NO	NO	2015	MWW	H	53	51	NonAIDS	3.8	3.8	432	432	26	775		INNTI	2N+1NN	0	69	134	65	69		799		2.1	NO					1.3		YES
80999384747	2015	YES	VIH		YES	YES	NO	2015	MWW	H	58	56	NonAIDS	5.9	5.9	101.2	101.2	15	443	Simplification	IPb	2N+1IPb	0	84	408	324	84		758								2.1		NO
80999384748	2015	YES	VIH		NO	NO	NO	2015	Woman	F	61	59	NonAIDS	5.5	5.5	435.4	435.4	21	639	Other	IPb	2N+1IPb	7	44	677	626	51		790								2.1		NO
80999384766	2015	YES	VIH		NO	NO	NO	2015	Woman	F	31	29	NonAIDS	3.2	3.2	705.7	705.7	9	267	Simplification	IPb	2N+1IPb	7	4	40	29	11		722		1.6	YES		1.3	YES										1.6	YES
80999384767	2015	YES	VIH		YES	YES	NO	2015	Woman	F	41	39	NonAIDS	4.8	4.8	154.7	154.7	3	98	Simplification	IPb	2N+1IPb	11	3	66	52	14		740					1.6	YES
80999384772	2015	YES	VIH		YES	YES	NO	2015	Woman	F	52	50	NonAIDS	4.3	4.3	107.6	107.6	24	724		INSTI	2N+1II	1	31	155	123	32		709		1.7	NO									1.6	YES			1.6	YES
80999384773	2015	YES	VIH		ND	ND	NO	2014	MWM	H	41	38	NonAIDS					25	749		INNTI	2N+1NN	360	4	416	52	364		669														NO				1.9
80999384776	2015	YES	VIH		NO	NO	NO	2015	Woman	F	64	62	NonAIDS	1.6	1.4	863	556.9	19	572		Other	2N	21	162	0	-183	183		682								1.6		YES				YES				1.6
80999384779	2016	YES	VIH		NO	NO	NO	2015	MWM	H	39	37	NonAIDS	3.9	4.4	426.8	426.8	22	665		INNTI	2N+1NN	55	56	419	308	111		695								1.3		YES					732	1.3	YES
80999384780	2016	YES	VIH		YES	NO	NO	2015	Woman	F	36	34	NonAIDS	4	4	292.3	287.8	1	17	SIDEFF	IPb	2N+1IPb	47	14	289	228	61		420	403	1.4	YES
80999384817	2016	YES	VIH		NO	NO	NO	2015	MWM	H	32	30	NonAIDS	4.9	4.3	421	458	10	301		INNTI	2N+1NN	242	236			478		413									NO										4.4
80999384877	2013	YES	VIH		NO	NO	YES	2013	MWM	H	48	44	NonAIDS	5.17	4.14	606	513	11	357	Simplification	IPb	2N+1IPb	19	35	274	220	54		1500															695	1.3	YES
80999384878	2013	YES	VIH		YES	NO	NO	2013	MWM	H	46	42	NonAIDS	4.89	4.84	306	353	5	166	Simplification	Other	2N+1II+1IE	11	72	195	112	83		1499	574	1.86	NO				690	1.3	YES	YES	643	1.63	NO	YES				1.3	1.34
80999385089	2017	NO	VIH		ND	ND	NO	2015	MWW	H	58	56	AIDS		5.4		307.4	4	108	SIDEFF	IPb	2N+1IPb	875	77	1076	124	952	994	131
80999385226	2017	NO	VIH		ND	ND	NO	2013	MWM	H	53	49	NonAIDS		1.6		283.5	1	25		INSTI	2N+1II	1654	0	1402	-252	1654		0
110000003609	2011	YES	VIH		ND	ND	NO	2010	Woman	F	25	18	NonAIDS		1.3		610	0	14	SIDEFF	Other	1IPb	1264	1119	347	-2036	2383		1148	770	1.3	YES
110000004387	2011	NO	VIH		ND	ND	NO	2012	MWM	H	50	47	NonAIDS		3.46		798	9	279	Simplification	IPb	2N+1IPb	908	9	993	76	917		288
110121532619	2010	YES	VIH		NO	NO	NO	2010	MWM	H	34	27	NonAIDS	4.05	4.32	828	890	32	959		INSTI	2N+1II	1491	427	2205	287	1918		1064															1221	1.3	YES
110130001307	2012	NO	VIH		NO	NO	NO	2012	MWW	H	33	31	NonAIDS	3.33	3.39	800	819	45	1365		IPb	2N+1IPb	565	18			583		18
110327175319	2012	NO	VIH&HEP	VHB	YES	NO	NO	2012	Woman	F	34	31	NonAIDS	5	4.37	328	367	36	1077		INNTI	2N+1NN	864	7			871		7
110332073391	2012	YES	VIH		NO	NO	NO	2012	Woman	F	43	38	NonAIDS	3.82	4.76	543	200	9	260	Other	IPb	2N+1IPb	1238	54	1412	120	1292		859	244	2.43	NO				206	1.3		YES
110545910120	2012	YES	VIH&HEP	VHB	NO	NO	NO	2012	MWW	H	34	31	NonAIDS	2.33	2.96	615	665	48	1438		INNTI	2N+1NN	538	0			538		476
110631893396	2010	YES	VIH		NO	NO	NO	2010	MWW	H	53	46	NonAIDS	2.93	3.07	1136	956	30	900		Other	2N	1703	304	2047	40	2007		1005
110927944362	2010	YES	VIH		ND	ND	NO	2010	MWM	H	27	20	NonAIDS		2.94		498	26	788		Other	2N	1350	560	1993	83	1910		1316	447	1.38	YES	664	1.3	YES	574	1.3		YES	545	1.3	YES		694	1.3	YES
110999981296	2013	YES	VIH&HEP	VHC	NO	NO	NO	2014	MWM	H	34	31	NonAIDS	2.99	2.99	564	564	37	1100	Other	INSTI	2N+1II	4	2	37	31	6		1129	577	1.3	YES
110999981517	2013	YES	VIH		NO	NO	NO	2013	MWW	H	43	39	NonAIDS	2.8	2.52	445	936	26	814	Simplification	IPb	2N+1IPb	255	18	297	24	273		1368	982	1.3	YES	696	1.3	YES	756	1.3		YES	710	1.3	YES	YES				1.3
110999981753	2013	YES	VIH		NO	NO	NO	2013	Woman	F	33	29	NonAIDS	3.76	2.55	484	447	46	1390		Other	2N	119	65	477	293	184		1368									NO						806	1.3	YES		2.55
110999981906	2013	NO	VIH		ND	ND	NO	2012	MWW	H	51	49	NonAIDS		5.52		547	48	1445		IPb	2N+1IPb	595	0	766	171	595		241	789	3.26	NO	874	1.34	YES	918	1.3		YES
110999981971	2013	NO	VIH		NO	NO	NO	2013	Woman	F	63	62	NonAIDS	3.79	4.19	635	489	1	21	SIDEFF	INNTI	2N+1NN	23	57			80		83	341	1.94	NO
110999981986	2013	YES	VIH		NO	NO	YES	2013	MWM	H	54	50	NonAIDS	4.73	4.56	844	579	6	193	Other	IPb	2N+1IPb	25	4	218	189	29		1120	672	3.05	NO				705	1.3		YES				YES				1.3
110999981994	2014	NO	VIH		NO	NO	NO	2013	MWM	H	44	43	NonAIDS	3.28	3.28	489	489	0	7	SIDEFF	INNTI	2N+1NN	16	32			48		67
110999981998	2014	NO	VIH		YES	NO	NO	2013	MWW	H	37	34	NonAIDS	4.79	4.87	296	338	4	119	Other	IPb	2N+1IPb	38	11	203	154	49		1065	356	2.95	NO
110999982000	2014	YES	VIH		YES	NO	NO	2014	Woman	F	60	57	AIDS	1.3	4.85	358	402	33	1003	Failure	INNTI	2N+1NN	3	64	3	-64	67	3	1366							473	1.3		YES					503	1.3	YES
110999982001	2014	YES	VIH		ND	ND	NO	2013	MWM	H	41	39	NonAIDS		3.68		842	46	1390		Other	2N	98	65	184	21	163		609	903	1.3	YES	824	1.3	YES			YES		1281	1.3	YES		1042	1.3	YES		1.3
110999982011	2014	NO	VIH		YES	YES	NO	2014	MWW	H	51	50	AIDS	4.6	4.6	22	22	6	177	Failure	INNTI	2N+1NN	0	10	214	204	10	5	361	84	2.38	NO	54	3.5	NO	56	3.84	NO	NO									3.84
110999982018	2014	YES	VIH		NO	NO	YES	2013	MWM	H	55	51	NonAIDS	6.11	6.11	927	927	3	82	SIDEFF	INNTI	2N+1NN	14	6	194	174	20		1369															1236	1.3	YES
110999982026	2014	NO	VIH		YES	NO	NO	2014	Woman	F	39	36	NonAIDS	4.54	4.54	225	225	46	1388		INNTI	2N+1NN	7	60	296	229	67		1106
110999982044	2014	YES	VIH		NO	NO	NO	2014	MWM	H	47	44	NonAIDS	4.43	4.43	356	356	37	1137	SIDEFF	INNTI	2N+1NN	11	14	268	243	25		1403
110999982045	2014	YES	VIH		YES	YES	NO	2014	MWW	H	35	32	AIDS	5.2	5.2	192	192	6	172	Failure	INSTI	2N+1II	13	0	125	112	13	0	1346	10	1.74	NO				142	1.3	NO	YES	274	1.3	YES	YES	533	1.3	YES	1.3	2.44
110999982066	2014	YES	VIH		NO	NO	NO	2014	MWM	H	35	34	NonAIDS	4.48	4.48	535	535	47	1424		INNTI	2N+1NN	16	14	213	183	30		454	655	2.05	NO	759	2.1	NO	548	1.3		YES
110999982067	2014	NO	VIH		NO	NO	NO	2013	MWM	H	28	27	NonAIDS	3.92	4.7	479	299	48	1441		INSTI	2N+1II	25	0			25		163
110999982074	2014	YES	VIH		NO	NO	YES	2014	MWW	H	30	27	NonAIDS	6.67	6.67	352	352	12	365	Simplification	IPb	2N+1IPb	6	0	184	178	6		1282				616	2.15	NO	657	1.3	YES	YES	766	1.3	YES	YES	703	1.3	YES	1.3	1.3
110999982075	2014	YES	VIH		YES	YES	NO	2014	Woman	F	50	47	NonAIDS	4.71	4.71	137	137	35	1038	Other	INNTI	2N+1NN	13	0	112	99	13		1297				244	1.3	YES
110999982089	2014	YES	VIH		YES	YES	NO	2014	MWW	H	54	51	AIDS	5.4	5.4	248	248	47	1430		INNTI	2N+1NN	6	11	373	356	17	0	1283											575	1.3	YES	YES	617	1.3	YES	1.3
110999982090	2014	YES	VIH		YES	NO	NO	2013	MWM	H	56	52	NonAIDS	5.6	5.75	326	246	7	216	Other	IPb	2N+1IPb	78	0	674	596	78		1084	505	3.8	NO
110999982122	2014	YES	VIH		NO	NO	YES	2014	MWM	H	32	29	NonAIDS	7	7	460		47	1430		INNTI	2N+1NN	0	0	171	171	0		1390				460	1.71	NO	538	1.3	YES	YES	616	1.3	YES	YES				1.3	1.3
110999982127	2014	YES	VIH		YES	YES	NO	2014	MWM	H	27	24	NonAIDS	5.1	5.1	181	181	7	202	SIDEFF	INNTI	2N+1NN	1	7	199	191	8		1367	275	3.16	NO				319	1.3		YES				YES				1.3
110999982137	2014	YES	VIH		YES	YES	NO	2014	MWW	H	56	53	AIDS					0	0	Other	INNTI	2N+1NN	5	0	496	491	5	3	1335											98	5.61	NO	NO				5.61
110999982139	2014	NO	VIH		ND	ND	NO	2012	MWM	H	39	37	NonAIDS		3.7		473	45	1355		INNTI	2N+1NN	531	63			594		63
110999982141	2014	YES	VIH		YES	NO	NO	2013	MWM	H	49	45	NonAIDS	4.5	4.5	341	341	35	1053	Other	IPb	2N+1IPb	58	0	256	198	58		1383	366	2.48	NO	419	1.95	NO									425	1.3	YES
110999982157	2014	YES	VIH		YES	YES	NO	2014	Woman	F	40	37	AIDS	5.32	5.32	14	14	24	708	Other	IPb	2N+1IPb	0	4	108	104	4	0	1385	31	2.67	NO	104	1.63	NO									301	1.3	YES
110999982172	2014	YES	VIH		NO	NO	NO	2014	Woman	F	29	26	NonAIDS	4.63	4.63	390	390	36	1086	SIDEFF	INSTI	2N+1II	20	25	84	39	45		1300				697	1.3	YES	603	1.3		YES					929	1.3	YES
110999982181	2014	YES	VIH		ND	ND	NO	2013	MWM	H	42	38	NonAIDS		3.7		276	21	665	Other	INSTI	2N+1II	103	189	353	61	292		1279							721	1.6		YES				YES				1.6
110999982182	2014	YES	VIH		NO	NO	NO	2013	MWM	H	36	32	NonAIDS	4.32	3.6	817	844	0	9	SIDEFF	Other	3N+1IPb	78	747	869	44	825		1279															1235	1.3	YES
110999982190	2014	YES	VIH		YES	YES	NO	2014	Woman	F	82	79	AIDS	4.55	4.55	168	168	31	958	Simplification	INSTI	2N+1II	8	1	140	131	9	0	1288							110	1.82		NO
110999982193	2014	YES	VIH		NO	NO	NO	2014	MWM	H	31	28	NonAIDS	4.35	4.21	501	605	23	701	Failure	Other	2N	5	22	64	37	27		1167											480	1.9	NO
110999982197	2014	YES	VIH		ND	ND	NO	2012	MWW	H	34	31	NonAIDS		3.6		576	46	1379		INNTI	2N+1NN	708	14			722		470
110999982203	2014	YES	VIH		YES	NO	NO	2014	MWM	H	21	20	NonAIDS	4.97	4.97	284	284	46	1382		IPb	2N+1IPb	0	11			11		653															330	2.67	NO
110999982204	2014	YES	VIH		YES	YES	NO	2014	MWW	H	66	65	AIDS	5.02	5.02	349	349	46	1390		INNTI	2N+1NN	55	2	260	203	57	45	394
110999982236	2014	YES	VIH		YES	NO	NO	2014	MWM	H	65	62	NonAIDS	4.82	4.94	255	250	45	1354		INNTI	2N+1NN	11	30	370	329	41		1303														YES	535	1.3	YES	1.3
110999982278	2014	YES	VIH		ND	ND	NO	2010	MWW	H	82	75	AIDS		5.63		10	12	351	SIDEFF	IPb	2N+1IPb	1311	4	2214	899	1315	1310	1146	76	3.67	NO	83	1.9	NO
110999982281	2014	YES	VIH		NO	NO	YES	2014	MWM	H	53	50	NonAIDS	5.35	5.35	500	532	15	467	Other	INSTI	2N+1II	1	0	32	31	1		1349	772	1.3	YES	843	1.3	YES	719	1.3	YES	YES	979	1.3	YES	YES	872	1.3	YES	1.3	1.3
110999982284	2014	YES	VIH&HEP	VHB	YES	YES	NO	2014	MWW	H	29	26	NonAIDS	5.19	5.19	42	42	1	26	Other	IPb	2N+1IPb	0	4	101	97	4		1133				205	1.3	YES
110999982285	2014	YES	VIH		ND	ND	NO	2011	MWM	H	39	33	NonAIDS					42	1274		INNTI	2N+1NN	1186	91	1327	50	1277		1267											550	1.3	YES		585	1.3	YES
110999982289	2014	YES	VIH		NO	NO	NO	2014	MWM	H	48	45	NonAIDS	5.5	5.38	536	368	4	140	SIDEFF	IPb	2N+1IPb	6	35	573	532	41		1317	827	3.41	NO						NO						984	1.3	YES		2.17
110999982298	2014	NO	VIH		NO	NO	YES	2011	MWM	H	25	22	NonAIDS		4.27		755	44	1322		INNTI	2N+1NN	921	41	1021	59	962		244	882	2.26	NO				1086	1.3		YES
110999982300	2014	YES	VIH		NO	NO	NO	2014	MWM	H	37	34	NonAIDS	2.61	2.56	351	670	45	1362		Other	2N	9	0	55	46	9		1289							914	1.3	YES	YES									1.3
110999982302	2014	YES	VIH		YES	NO	NO	2014	MWM	H	37	34	NonAIDS	4.62	4.62	301	407	39	1187	Other	INSTI	2N+1II	13	0	185	172	13		1289							602	1.3	YES	YES									1.3
110999982307	2014	YES	VIH		YES	YES	NO	2014	MWW	H	67	64	AIDS	4.81	4.81	95	95	41	1243	Other	INSTI	2N+1II	0	13	129	116	13	0	1334	259	2.24	NO								458	1.3	YES	YES	408	1.3	YES	1.3
110999982308	2014	YES	VIH		NO	NO	NO	2014	MWM	H	30	27	NonAIDS	3.18	3.96	574	492	44	1333		INSTI	2N+1II	52	28	114	34	80		1197	614	1.3	YES	746	1.3	YES	664	1.3	YES	YES					686	1.3	YES		1.3
110999982312	2014	NO	VIH		NO	NO	NO	2014	MWW	H	37	34	NonAIDS	3.92	3.92	630	630	30	914	Other	INNTI	2N+1NN	0	0	140	140	0		1249	660	1.4	YES												980	1.3	YES
110999982319	2014	YES	VIH		NO	NO	NO	2014	Woman	F	34	31	NonAIDS	4.73	4.73	445	445	1	24	Other	Other	2N+1IPb+1II	40	0	96	56	40		1329
110999982331	2014	YES	VIH		NO	NO	YES	2014	MWM	H	46	43	NonAIDS	6.39	6.39	284	284	45	1350		INSTI	2N+1II	1	0	242	241	1		1294											553	1.3	YES	YES	578	1.3	YES	1.3
110999982342	2014	YES	VIH		ND	ND	NO	2013	MWM	H	49	45	NonAIDS		4.51		244	44	1335		INNTI	2N+1NN	253	12	422	157	265		1267	464	1.43	YES
110999982351	2014	YES	VIH		NO	NO	NO	2014	Woman	F	24	21	NonAIDS	2.77	2.77	388	388	5	132	Other	Other	2N	4	1	59	54	5		1326	492	1.59	YES	601	1.3	YES									528	1.34	YES
110999982353	2014	YES	VIH&HEP	VHB	YES	YES	NO	2014	Woman	F	36	33	NonAIDS	5.4	5.4	109	109	3	74	Other	IPb	2N+1IPb	14	19	572	539	33		1336	164	3.46	NO	145	4.65	NO	129	4.54		NO	282	1.81	NO	NO	262	1.3	YES	1.93
110999982368	2014	YES	VIH		NO	NO	NO	2014	MWM	H	44	41	NonAIDS	2.9	3.95	577	588	0	0	Other	Other	2N	6	53	555	496	59		1307
110999982379	2014	YES	VIH		YES	YES	NO	2014	Woman	F	38	35	NonAIDS	4.4	4.4	18	17	7	195	Other	IPb	2N+1IPb	50	7	168	111	57		1140									YES		76	1.3	YES						1.3
110999982384	2014	YES	VIH		NO	NO	NO	2014	Woman	F	38	35	NonAIDS	4.36	4.72	548	512	6	189	Simplification	IPb	2N+1IPb	35	22	174	117	57		1239	514	2.56	NO						YES		730	1.3	YES						1.3
110999982398	2014	YES	VIH&HEP	VHB	YES	NO	NO	2014	MWW	H	57	54	NonAIDS	4	3.98	248	301	38	1161	Other	INSTI	2N+1II	0	16	45	29	16		1177	425	1.3	YES	493	3.57	NO	598	1.3	YES	YES									1.3
110999982426	2014	YES	VIH		NO	NO	NO	2014	MWW	H	44	41	NonAIDS	3.77	3.77	797	797	44	1314		Other	2N	13	0	97	84	13		1213
110999982454	2014	YES	VIH		YES	YES	NO	2014	MWW	H	38	35	NonAIDS	5.63	5.63	39	39	0	16	SIDEFF	Other	2N+1IPb+1II	6	4	213	203	10		991															338	1.3	YES
110999982462	2014	YES	VIH&HEP	VHB	YES	NO	NO	2014	Woman	F	27	24	NonAIDS	4.65	4.71	279	279	6	181	Other	IPb	2N+1IPb	1	0	127	126	1		1231							529	1.3	YES	YES					564	1.3	YES		1.3
110999982467	2014	YES	VIH		YES	NO	NO	2014	Woman	F	48	45	NonAIDS	3.86	4.3	279	469	1	31	SIDEFF	INNTI	2N+1NN	45	35	150	70	80		1223	381	1.81	NO				467	1.3		YES
110999982474	2014	YES	VIH		NO	NO	YES	2014	MWM	H	41	38	NonAIDS	7	7	146	146	35	1061	Other	INSTI	2N+1II	1	0	102	101	1		1257	476	2.82	NO								475	1.3	YES	YES	527	1.3	YES	1.3
110999982490	2014	NO	VIH		YES	NO	NO	2014	Woman	F	29	26	NonAIDS	4.38	4.38	222	253	4	114	Failure	IPb	2N+1IPb	74	0			74		1283	276	2.29	NO						YES										1.49
110999982495	2014	YES	VIH		YES	YES	NO	2014	MWW	H	48	45	NonAIDS	4.73	4.73	145	145	32	972	Failure	INNTI	2N+1NN	0	3	171	168	3		1253							326	1.3	YES	YES									1.3
110999982516	2014	YES	VIH		NO	NO	NO	2014	MWM	H	39	36	NonAIDS	4.41	4.41	502	355	44	1344	Other	INNTI	2N+1NN	4	1	106	101	5		1192
110999982519	2014	YES	VIH		NO	NO	NO	2014	MWM	H	36	33	NonAIDS	4	4.37	496	282	44	1344	Other	INNTI	2N+1NN	5	1	103	97	6		1192				626	1.3	YES
110999982533	2014	YES	VIH		YES	YES	NO	2014	Woman	F	27	24	NonAIDS	3.63	3.63	123	123	0	23	SIDEFF	IPb	2N+1IPb	1	5	57	51	6		1224									YES						312	1.3	YES		1.3
110999982538	2014	YES	VIH		YES	NO	NO	2014	MWM	H	42	39	NonAIDS	4.7	4.7	276	276	3	112	Simplification	IPb	2N+1IPb	4	4	140	132	8		1261	547	2.67	NO	734	2.32	NO
110999982539	2014	NO	VIH		ND	ND	NO	2014	MWM	H	38	38	NonAIDS					42	1270		IPb	2N+1IPb	0	4			4		0
110999982540	2014	YES	VIH		NO	NO	NO	2014	MWM	H	52	49	NonAIDS	4.68	5.1	438	323	38	1148		INNTI	2N+1NN	0	126	333	207	126		1199
110999982550	2014	YES	VIH		YES	NO	NO	2014	MWW	H	59	56	NonAIDS	5.3	5.3	331	362	4	119	SIDEFF	IPb	2N+1IPb	5	2	510	503	7		987
110999982552	2014	YES	VIH&HEP	VHB	YES	NO	NO	2014	Woman	F	43	42	AIDS	2.4	2.4	411	411	42	1272		INSTI	2N+1II	26	0	57	31	26	24	476	367	1.3	YES	171	1.3	YES
110999982555	2014	NO	VIH		NO	NO	NO	2014	MWM	H	29	28	NonAIDS	4.99	4.62	563	493	42	1260		INSTI	2N+1II	6	11	103	86	17		355				761	1.3	YES								YES				1.3
110999982576	2014	YES	VIH		NO	NO	NO	2014	MWW	H	38	35	NonAIDS	4.29	4.34	616	594	7	222	SIDEFF	INNTI	2N+1NN	36	84	169	49	120		1225	838	2.15	NO						YES					YES				1.3	1.3
110999982582	2014	YES	VIH		YES	NO	NO	2014	MWW	H	49	46	NonAIDS	4.54	4.54	276	276	8	249	Simplification	IPb	2N+1IPb	24	0	196	172	24		1068				415	1.68	NO	486	1.3		YES	506	1.3	YES	YES				1.3
110999982592	2014	YES	VIH		YES	NO	NO	2014	Woman	F	43	40	NonAIDS	4.8	5.4	301	480	9	263	SIDEFF	INSTI	2N+1II	13	35	104	56	48		1236							700	1.6		YES
110999982597	2014	YES	VIH		ND	ND	NO	2011	MWM	H	49	45	NonAIDS		4.23		465	40	1204		Other	1II	1139	49			1188		455
110999982600	2014	NO	VIH		YES	YES	NO	2014	Woman	F	41	41	NonAIDS	5.3	5.3	11	11	42	1250		INSTI	2N+1II	2	0			2		70
110999982608	2014	YES	VIH		NO	NO	NO	2014	Woman	F	31	28	NonAIDS	3.84	3.84	412	412	30	941	SIDEFF	INSTI	2N+1II	8	34	84	42	42		1115														YES				1.3
110999982611	2014	YES	VIH		ND	ND	NO	2010	Woman	F	32	25	NonAIDS		5.4		41	19	604	Other	INSTI	2N+1II	1507	3	1595	85	1510		1232	203	2.31	NO	194	1.3	YES									395	1.3	YES
110999982621	2014	YES	VIH		NO	NO	NO	2014	MWM	H	62	59	NonAIDS	4.6	4.56	428	428	38	1163	Other	INNTI	2N+1NN	57	0	164	107	57		1164															643	1.3	YES
110999982650	2014	YES	VIH		YES	YES	NO	2014	MWW	H	56	53	AIDS	5.82	5.82	40	40	1	26	Simplification	INSTI	2N+1II	5	2	183	176	7	4	1156	67	2.1	NO				200	1.3	YES	YES				YES				1.3	1.3
110999982663	2014	NO	VIH		NO	NO	YES	2014	MWM	H	32	32	NonAIDS	5.52	5.52	702	702	41	1231		INSTI	2N+1II	1	0			1		3
110999982674	2014	NO	VIH		NO	NO	NO	2014	MWW	H	41	38	NonAIDS	4.3	4.3	483	483	5	150	Other	Other	2N	37	5			42		1131	465	4.29	NO
110999982676	2014	YES	VIH		NO	NO	NO	2014	MWM	H	27	24	NonAIDS	4.8	4.87	374	277	41	1225		INNTI	2N+1NN	222	0	371	149	222		1204	423	2.4	NO						NO					YES				1.3	4.8
110999982696	2014	YES	VIH		NO	NO	YES	2014	MWM	H	30	27	NonAIDS	5.98	5.82	185	230	1	41	SIDEFF	INSTI	2N+1II	4	6	345	335	10		999	402	3.64	NO	398	3.62	NO	412	2.13	NO	NO									2.13
110999982697	2014	NO	VIH		ND	ND	NO	2011	MWM	H	27	23	NonAIDS		1.3		517	2	42	SIDEFF	IPb	2N+1IPb	1019	0	1019	0	1019		287				533	1.3	YES
110999982698	2014	YES	VIH		NO	NO	NO	2014	MWW	H	39	36	NonAIDS	4.22	4.22	588	588	40	1214		IPb	2N+1IPb	34	4	218	180	38		1176	857	2.1	NO	978	1.69	NO	925	1.3		YES
110999982701	2014	YES	VIH		ND	ND	NO	2011	MWW	H	49	45	AIDS		4.42		13	11	316	Simplification	INSTI	2N+1II	1174	21			1195	1174	368
110999982714	2014	NO	VIH		NO	NO	NO	2014	MWM	H	32	32	NonAIDS	4.44	4.44	838	838	40	1215		IPb	2N+1IPb	2	0			2		28
110999982722	2014	YES	VIH		NO	NO	NO	2014	Woman	F	34	31	NonAIDS	4.87	4.87	496	496	10	306	Other	INNTI	2N+1NN	0	4	190	186	4		1208	493	2.3	NO	734	1.58	YES	752	1.3	YES	YES	465	1.3	YES	YES	616	1.54	YES	1.3	1.3
110999982726	2014	YES	VIH		YES	YES	NO	2014	Woman	F	27	24	NonAIDS	5.29	5.71	7	5	7	203	Other	INSTI	2N+1II	28	17	125	80	45		1178				107	1.3	YES					221	1.3	YES	YES				1.3
110999982732	2014	YES	VIH		NO	NO	YES	2014	MWM	H	53	50	NonAIDS	7	7	482	482	32	973	Other	INSTI	2N+1II	7	0	98	91	7		1134	541	2.43	NO	617	1.3	YES	721	1.3	YES	YES	1011	1.3	YES	YES				1.3	1.3
110999982740	2014	NO	VIH		YES	NO	NO	2014	MWM	H	29	28	NonAIDS	4.77	4.77	219	219	40	1196		INSTI	2N+1II	11	8	159	140	19		333	302	1.97	NO
110999982743	2014	YES	VIH		NO	NO	NO	2014	MWM	H	47	44	NonAIDS	3.22	3.22	643	643	40	1196		INNTI	2N+1NN	7	8	35	20	15		1129
110999982748	2014	YES	VIH		NO	NO	YES	2014	Woman	F	51	48	NonAIDS	2.55	2.78	774	774	9	273	Other	INSTI	2N+1II	15	1	37	21	16		1142				1180	1.3	YES					1124	1.3	YES		1268	1.3	YES
110999982754	2014	NO	VIH&HEP	VHB	ND	ND	NO	2011	MWW	H	36	30	NonAIDS		1.3		751	40	1202		INNTI	2N+1NN	1190	0	1190	0	1190		895
110999982767	2014	YES	VIH		NO	NO	NO	2014	MWW	H	63	61	NonAIDS	4.82	4.82	396	396	39	1186		IPb	2N+1IPb	69	11	196	116	80		779														YES				1.3
110999982773	2014	YES	VIH		NO	NO	NO	2014	MWM	H	23	20	NonAIDS	4.53	4.53	780	780	38	1150	Simplification	INNTI	2N+1NN	12	28	152	112	40		1178
110999982798	2014	YES	VIH		YES	NO	NO	2014	MWW	H	58	55	NonAIDS	5	5	216	216	31	951	Other	INNTI	2N+1NN	30	14	251	207	44		1112															336	1.3	YES
110999982799	2014	YES	VIH		YES	NO	NO	2014	Woman	F	43	40	NonAIDS	4.26	4.26	304	304	33	1001	Simplification	IPb	2N+1IPb	42	14	169	113	56		1015									YES										1.3
110999982808	2014	NO	VIH		NO	NO	NO	2014	Woman	F	27	27	NonAIDS	3.04	3.04	392	392	39	1181		INSTI	2N+1II	8	0			8		0
110999982811	2014	YES	VIH		YES	YES	NO	2014	MWM	H	34	31	AIDS	5	5.12	13	26	5	159	Failure	INSTI	2N+1II	4	36	159	119	40	0	1146	59	2.24	NO												234	1.3	YES
110999982814	2014	YES	VIH		YES	YES	NO	2014	MWW	H	53	50	NonAIDS	1.3	1.3	193	254	4	116	Other	INNTI	2N+1NN	7	98	0	-105	105		1134											260	1.38	YES	YES				1.3
110999982824	2014	YES	VIH		YES	NO	NO	2014	MWM	H	71	68	NonAIDS	4.48	4.43	283	283	39	1161		INSTI	2N+1II	60	14	255	181	74		1148	485	1.38	YES				467	1.3		YES					335	1.3	YES
110999982862	2014	YES	VIH		ND	ND	NO	2014	Woman	F	35	32	NonAIDS		4.27		760	26	788	SIDEFF	INNTI	2N+1NN	138	0	201	63	138		1136														YES	806	1.3	YES	1.3
110999982867	2014	YES	VIH		YES	YES	NO	2014	Woman	F	44	41	AIDS	5.13		25	25	2	61	Other	INSTI	2N+1II	8	9	203	186	17	0	982	138	1.83	NO	52	4.92	NO	114	1.3		YES
110999982876	2014	YES	VIH		YES	NO	NO	2014	Woman	F	52	49	NonAIDS	5.16	5.16	302	302	39	1167		INNTI	2N+1NN	11	4	239	224	15		856
110999982883	2014	YES	VIH		NO	NO	NO	2014	MWM	H	30	27	NonAIDS	5.22	5.22	625	625	2	35	Simplification	IPb	2N+1IPb	2	5	191	184	7		1153	761	3.37	NO				1062	1.3	YES	YES									1.3
110999982891	2014	NO	VIH		NO	NO	YES	2014	MWM	H	52	49	NonAIDS	5.79	5.79	348	348	5	129	Simplification	IPb	2N+1IPb	10	2	184	172	12		1069				465	2.88	NO	575	1.3	YES	YES	586	1.3	YES	YES	628	1.3	YES	1.3	1.3
110999982916	2014	YES	VIH		NO	NO	NO	2014	MWM	H	28	25	NonAIDS	4.2	3.6	432	542	23	683	Other	INSTI	2N+1II	7	29	58	22	36		1126									YES						857	1.6	YES		1.6
110999982966	2014	YES	VIH		YES	NO	NO	2014	Woman	F	35	32	NonAIDS	3.05	3.05	319	319	38	1138		Other	2N	0	12	39	27	12		978	513	1.3	YES						YES		552	1.3	YES						1.3
110999982967	2014	YES	VIH		YES	NO	NO	2014	MWW	H	49	46	NonAIDS	2.8	2.95	298	241	24	749	SIDEFF	Other	2N	9	23	70	38	32		1075							422	1.3		YES				YES				1.3
110999982986	2014	YES	VIH		NO	NO	NO	2014	MWM	H	51	48	NonAIDS	5.03	5.03	599	599	29	894	Other	INSTI	2N+1II	4	0	102	98	4		1097	894	1.83	NO	583	1.3	YES
110999982987	2014	YES	VIH		NO	NO	NO	2014	MWM	H	48	45	NonAIDS	3.18	3.18	714	714	29	894	Other	INSTI	2N+1II	4	0	35	31	4		1097	783	1.3	YES	899	1.3	YES
110999982990	2014	YES	VIH		YES	NO	NO	2014	MWW	H	47	44	AIDS	4.25	4.25	267	267	28	855	Other	INNTI	2N+1NN	0	14	1031	1017	14	896	1116														NO				1.78
110999982994	2014	YES	VIH		NO	NO	NO	2014	MWM	H	28	25	NonAIDS	4.6	4.6	380	380	2	83	Simplification	IPb	2N+1IPb	5	21	214	188	26		1078				430	1.43	YES
110999983038	2014	NO	VIH		NO	NO	NO	2014	MWM	H	30	29	NonAIDS	3.76	3.76	781		37	1127		INSTI	2N+1II	0	0	8	8	0		319	914	1.3	YES
110999983039	2014	YES	VIH&HEP	VHB	YES	YES	NO	2014	MWW	H	58	55	AIDS	2.42	2.98	13	13	0	4	Other	INNTI	2N+1NN	16	5	82	61	21	13	975	34	1.46	YES	53	1.3	YES	81	1.3		YES				NO				3.44
110999983045	2014	NO	VIH		NO	NO	NO	2014	MWM	H	44	41	NonAIDS	4.64	4.64	440	440	6	189	Simplification	IPb	2N+1IPb	10	0	97	87	10		1437				686	1.3	YES	727	1.3	YES	YES				YES	872	1.3	YES	1.3	1.3
110999983046	2014	NO	VIH		ND	ND	NO	2013	MWW	H	50	49	AIDS		5.7		35	47	1427		IPb	2N+1IPb	94	7	251	150	101	101	168	101	2.89	NO						NO										2.29
110999983047	2014	YES	VIH		NO	NO	NO	2014	MWM	H	30	29	NonAIDS	2.16	1.98	519	432	10	297	SIDEFF	INNTI	2N+1NN	8	14	80	58	22		443
110999983049	2014	YES	VIH		NO	NO	NO	2014	Woman	F	39	36	NonAIDS	4.91	4.91	399		7	210	Simplification	IPb	2N+1IPb	32	0	202	170	32		1359	489	2.88	NO	591	1.83	NO	663	1.3		YES	703	1.3	YES		646	1.3	YES
110999983051	2014	NO	VIH		NO	NO	NO	2014	MWM	H	35	35	NonAIDS	4.8	4.8	1038	1038	39	1161		INNTI	2N+1NN	11	28			39		66
110999983074	2014	YES	VIH		YES	NO	NO	2014	MWW	H	30	27	NonAIDS	4.79	4.79	209	209	15	480	Simplification	IPb	2N+1IPb	15	0	196	181	15		1035	410	2.67	NO	427	1.82	NO	496	1.3		YES
110999983075	2014	YES	VIH		ND	ND	NO	2012	Woman	F	31	26	NonAIDS		3.6		406	18	552	Other	IPb	2N+1IPb	782	4	816	30	786		1069	514	1.3	YES	592	1.3	YES	772	1.3		YES					750	1.3	YES
110999983089	2014	YES	VIH		YES	NO	NO	2014	MWW	H	51	48	NonAIDS	4.86	4.86	323	323	37	1115		INNTI	2N+1NN	3	0	275	272	3		1090				485	2.05	NO									683	1.85	NO
110999983091	2014	NO	VIH		NO	NO	NO	2014	MWM	H	46	43	NonAIDS	4.6	4.63	432	432	31	959	SIDEFF	INSTI	2N+1II	5	0	173	168	5		959							635	1.3	YES	YES									1.3
110999983103	2014	YES	VIH		NO	NO	NO	2014	MWW	H	55	52	NonAIDS	5.68	5.68	372	372	4	119	Simplification	INSTI	2N+1II	0	2	112	110	2		1031	337	1.79	NO				431	2.42	YES	NO				YES				1.3	1.3
110999983106	2014	YES	VIH		NO	NO	NO	2014	MWM	H	47	44	NonAIDS	4.3	4.3	1054	1054	37	1109		INNTI	2N+1NN	31	3	115	81	34		1012	1150	2.02	NO	1004	1.3	YES			YES										1.3
110999983111	2014	YES	VIH		NO	NO	NO	2014	MWW	H	53	50	NonAIDS	1.3	1.3	576	576	18	554	Simplification	IPb	2N+1IPb	7	26	7	-26	33		936									YES					YES				1.3	1.3
110999983112	2014	YES	VIH		YES	NO	NO	2014	MWW	H	33	30	NonAIDS	5.04	5.04	293	293	39	1188	Other	INSTI	2N+1II	0	4	212	208	4		912
110999983125	2014	YES	VIH		NO	NO	NO	2014	MWW	H	59	56	NonAIDS	2.83	3.21	617		39	1187	Other	INNTI	2N+1NN	7	7	88	74	14		1026
110999983126	2014	YES	VIH		YES	NO	NO	2014	MWW	H	71	68	NonAIDS	5.3	5.14	290	150	15	437	SIDEFF	IPb	2N+1IPb	0	3	301	298	3		902	323	3.22	NO								508	1.3	YES	YES	288	1.34	YES	1.3
110999983138	2014	YES	VIH		YES	YES	NO	2014	Woman	F	55	52	AIDS	5.24	5	31	31	9	271	Simplification	INSTI	2N+1II	25	9	104	70	34	19	1039	22	1.58	YES	87	1.36	YES	109	1.3		YES				YES				1.3
110999983145	2015	YES	VIH&HEP	VHB	YES	NO	NO	2014	MWW	H	50	47	NonAIDS	5.19	5.19	238	238	9	288	SIDEFF	IPb	2N+1IPb	27	0	226	199	27		1065	356	3.63	NO												538	1.3	YES
110999983152	2015	YES	VIH		YES	NO	NO	2014	Woman	F	22	19	NonAIDS		4.63	300	300	27	828	Other	INNTI	2N+1NN	91	7	350	252	98		1075	344	2.87	NO											YES				1.3
110999983156	2015	NO	VIH		NO	NO	NO	2015	MWM	H	39	39	NonAIDS	4.11	4.11	378	378	36	1090		Other	1IPb+1II	0	0			0		7
110999983161	2014	NO	VIH&HEP	VHB	YES	YES	NO	2014	MWW	H	50	50	AIDS	4.9	4.9			38	1154		Other	2N+1IPb+1II	4	4			8	10	0
110999983181	2015	YES	VIH		YES	NO	NO	2014	MWW	H	44	42	NonAIDS	4.28	3.95	227	227	36	1078		IPb	2N+1IPb	47	5	426	374	52		384				334	1.46	YES					325	1.3	YES
110999983190	2015	YES	VIH		YES	YES	NO	2015	MWM	H	44	42	AIDS	6.39	6.39	201	201	33	984	Other	INSTI	2N+1II	4	3			7	4	987				610	2.75	NO					987	2	NO	NO	1045	1.92	NO	2
110999983208	2015	YES	VIH&SS		YES	NO	NO	2015	MWM	H	26	24	NonAIDS	4.8	4.75	232	232	15	435	SIDEFF	INNTI	2N+1NN	4	4	156	148	8		1032															702	1.3	YES
110999983209	2015	YES	VIH&HEP	VHC	ND	ND	NO	2014	MWW	H	56	53	NonAIDS		4.5		592	34	1020		INNTI	2N+1NN	368	54	614	192	422		734							611	1.3		YES				NO	760	2.29	NO	4.5
110999983245	2015	YES	VIH&HEP	VHB	NO	NO	NO	2015	Woman	F	50	48	NonAIDS	4.44	4.44	422	422	35	1053		INSTI	2N+1II	6	10	174	158	16		1011	490	1.9	NO						YES						607	1.48	YES		1.3
110999983246	2015	NO	VIH		YES	YES	NO	2015	MWW	H	35	35	NonAIDS	5.49	5.49	164	164	35	1063		IPb	2N+1IPb	0	0			0		169
110999983265	2015	YES	VIH&HEP	VHC	NO	NO	NO	2015	MWM	H	30	28	NonAIDS	4.14	4.14	528	528	35	1054		INSTI	2N+1II	26	2	148	120	28		1042	695	1.9	NO	646	1.79	NO
110999983267	2015	NO	VIH		NO	NO	NO	2015	MWW	H	46	44	NonAIDS	4.2	4.2	357	357	35	1055		IPb	2N+1IPb	27	0	211	184	27		741							469	1.3		YES
110999983281	2015	YES	VIH		YES	NO	NO	2015	MWM	H	68	66	NonAIDS	4.78	4.78	226	226	37	1120	Other	INSTI	2N+1II	0	10	60	50	10		990															478	1.3	YES
110999983290	2015	YES	VIH		ND	ND	NO	2014	Woman	F	32	29	NonAIDS		3.74		376	9	288	Simplification	IPb	2N+1IPb	94	15	171	62	109		997	789	2.23	NO	595	1.3	YES			YES						771	1.43	YES		1.3
110999983293	2015	YES	VIH&HEP	VHC	ND	ND	NO	2011	Woman	F	37	31	NonAIDS		4.06		214	0	16	Other	IPb	2N+1IPb	1322	36			1358		1053
110999983301	2015	YES	VIH		YES	YES	NO	2015	MWM	H	52	50	AIDS	5	5	209	209	18	534	SIDEFF	INNTI	2N+1NN	10	0	187	177	10	10	1021							389	1.3	YES	YES				YES	384	1.45	YES	1.3	1.3
110999983320	2015	YES	VIH		YES	NO	NO	2015	MWM	H	59	57	NonAIDS	5.89	5.89	350	350	5	133	Simplification	INSTI	2N+1II	0	0	81	81	0		994	439	1.7	NO	566	2	NO	605	1.7	NO	NO					723	1.3	YES		1.7
110999983325	2015	YES	VIH		NO	NO	NO	2015	MWM	H	27	25	NonAIDS	3.8	4.51	550	485	21	620		INNTI	2N+1NN	0	419	564	145	419		951															844	1.3	YES
110999983328	2015	YES	VIH&HEP	VHC	NO	NO	NO	2015	MWM	H	75	73	NonAIDS	4.35	3.98	573	614	7	237	Simplification	INSTI	2N+1II	29	34	132	69	63		1007							904	1.41	YES	YES	967	1.3	YES	YES	1013	1.3	YES	1.3	1.3
110999983329	2015	NO	VIH		YES	NO	NO	2015	MWW	H	32	32	NonAIDS	4.57	4.36	240	285	30	907		INNTI	2N+1NN	13	131			144		131
110999983330	2015	YES	VIH		YES	NO	NO	2015	MWW	H	31	29	NonAIDS	4.69	4.69	292	292	36	1092	Other	INNTI	2N+1NN	13	7	195	175	20		952	331	2.45	NO				452	1.3	YES	YES					472	1.3	YES		1.3
110999983343	2015	YES	VIH&HEP		ND	ND	NO	2010	MWW	H	34	27	NonAIDS		3.92		573	34	1034		IPb	2N+1IPb	1723	0	1814	91	1723		1002				460	1.3	YES
110999983358	2015	YES	VIH		YES	YES	NO	2015	MWM	H	49	47	NonAIDS	5.27	5.27	100	100	23	700	Failure	Other	1IPb+1II	6	8	212	198	14		990											381	1.3	YES		442	1.49	YES
110999983370	2015	YES	VIH		YES	NO	NO	2015	Woman	F	35	33	NonAIDS	4.53	4.53	270	270	20	623	Other	INSTI	2N+1II	16	3	78	59	19		1022	449	3.54	NO				469	1.3		YES
110999983380	2015	YES	VIH		NO	NO	YES	2015	MWM	H	32	30	NonAIDS	4.79	4.79	491	491	0	7	Other	Other	2N+1IPb+1II	0	0	31	31	0		834	908	1.3	YES	903	1.3	YES					982	1.3	YES	YES				1.3
110999983387	2015	YES	VIH		NO	NO	YES	2015	MWM	H	20	18	NonAIDS	6.05	6.05	729	729	34	1019		INSTI	2N+1II	0	2	28	26	2		968	801	1.3	YES
110999983397	2015	YES	VIH		YES	YES	NO	2015	MWW	H	22	20	NonAIDS	6	5.8	156	105	8	238	Intensification	IPb	2N+1IPb	3	19	294	272	22		923	267	3.65	NO				347	1.45		YES				YES				1.3
110999983405	2015	YES	VIH		YES	YES	NO	2015	MWW	H	56	55	NonAIDS	3.58	3.58	198	198	15	449	Failure	INNTI	2N+1NN	5	26	137	106	31		664	175	1.81	NO				191	1.3		YES	211	1.91	NO		236	4.33	NO
110999983406	2015	NO	VIH		ND	ND	NO	2014	MWM	H	29	26	NonAIDS		4.47		303	33	993		INNTI	2N+1NN	372	21	549	156	393		973	835	2.05	NO											NO				4.47
110999983428	2015	YES	VIH		NO	NO	NO	2015	MWW	H	37	35	NonAIDS	3.92	3.92	606	606	33	1000		INNTI	2N+1NN	7	8	91	76	15		840	568	1.78	NO						YES						658	1.3	YES		1.3
110999983437	2015	NO	VIH		ND	ND	NO	2014	Woman	F	24	23	NonAIDS		2.44		397	3	64	Failure	INSTI	2N+1II	141	0	226	85	141		115									NO										3.1
110999983458	2015	YES	VIH		NO	NO	NO	2015	Woman	F	41	39	NonAIDS	1.3	5.02	670	298	16	494	Other	INNTI	2N+1NN	0	169	0	-169	169		960	470	3.17	NO						NO						643	1.3	YES		3.55
110999983466	2015	YES	VIH		NO	NO	YES	2015	MWM	H	47	45	NonAIDS	3.97	4.93	789	729	0	10	Intensification	Other	1II	0	278	430	152	278		943															1233	1.3	YES
110999983470	2015	YES	VIH		NO	NO	NO	2015	Woman	F	25	23	NonAIDS	4.59	4.59	431	431	23	694	Other	INNTI	2N+1NN	8	9	181	164	17		901									YES										1.3
110999983474	2015	YES	VIH		ND	ND	NO	2013	Woman	F	37	33	NonAIDS		4.08		281	5	147	Intensification	Other	2N	668	23	752	61	691		917	335	2.08	NO
110999983492	2015	YES	VIH		ND	ND	NO	2011	Woman	F	40	34	AIDS		1.6		947	3	104	Other	Other	1IPb	1406	14	1406	-14	1420	1508	968
110999983494	2015	YES	VIH		ND	ND	NO	2014	Woman	F	26	24	NonAIDS		1.3		421	8	238	Other	IPb	2N+1IPb	157	188	325	-20	345		525	431	1.3	YES											YES				1.3
110999983524	2015	YES	VIH		NO	NO	NO	2015	Woman	F	68	66	NonAIDS	4.3	4.19	630	632	0	13	Simplification	INNTI	2N+1NN	31	5	60	24	36		880	691	1.3	YES												740	1.3	YES
110999983530	2015	YES	VIH		ND	ND	NO	2014	MWW	H	36	33	AIDS		4.32		78	4	130	Simplification	Other	3N+1IE	316	25	435	94	341	298	861				169	1.3	YES
110999983543	2015	YES	VIH		NO	NO	NO	2015	MWM	H	37	35	NonAIDS	6.1	4.75	459	448	33	1002	Other	INSTI	2N+1II	35	0	154	119	35		772	471	2.2	NO								448	4.8	NO
110999983557	2015	NO	VIH		ND	ND	NO	2012	MWW	H	39	36	NonAIDS		5.19		203	30	900		INSTI	2N+1II	1061	65	1061	-65	1126		65
110999983558	2015	YES	VIH		YES	YES	NO	2015	Woman	F	33	31	AIDS	5.75	6.02	79	46	10	320	Other	INSTI	2N+1II	0	30	191	161	30	6	637	225	2.94	NO	173	1.56	YES			YES					YES				1.3	1.3
110999983562	2015	YES	VIH		YES	YES	NO	2015	MWW	H	44	42	AIDS	4.88	5.09	10	11	16	492	Simplification	IPb	2N+1IPb	6	26	174	142	32	0	868	21	2.67	NO	58	2.09	NO			YES						281	1.3	YES		1.3
110999983564	2015	YES	VIH		YES	YES	NO	2015	MWW	H	51	49	AIDS	5.31	5.31	133	118	10	316	Simplification	IPb	2N+1IPb	17	0	235	218	17	14	925	242	3.51	NO
110999983607	2015	YES	VIH		NO	NO	NO	2015	MWM	H	36	34	NonAIDS	4.15	4.15	384	436	2	82	Simplification	INSTI	2N+1II	15	51	274	208	66		919
110999983633	2015	YES	VIH		YES	NO	NO	2015	MWM	H	33	31	NonAIDS	4.51	4.51	264	264	31	930		INNTI	2N+1NN	50	12	951	889	62		926							734	1.3	YES	YES									1.4
110999983634	2015	YES	VIH		NO	NO	NO	2015	MWM	H	37	35	NonAIDS	5.17	5.17	522	522	3	105	SIDEFF	INSTI	2N+1II	16	7	56	33	23		833	519	1.3	YES	465	1.3	YES								YES				1.3
110999983637	2015	YES	VIH		ND	ND	NO	2013	Woman	F	30	26	NonAIDS		5.05		87	31	934		INSTI	2N+1II	720	7	1082	355	727		846							197	1.41		YES	259	1.3	YES
110999983657	2015	YES	VIH		YES	YES	NO	2015	Woman	F	37	35	NonAIDS	4.88	4.88	151	151	31	933		IPb	2N+1IPb	23	0	119	96	23		885	298	2.66	NO	250	1.3	YES	258	1.3		YES	296	1.3	YES		422	1.3	YES
110999983694	2015	YES	VIH		ND	ND	NO	2015	Woman	F	30	28	AIDS	1.3	1.3		602	0	2	SIDEFF	Other	2N	23	174	49	-148	197	246	891									YES		497	1.3	YES	YES				1.3	1.3
110999983713	2015	YES	VIH		NO	NO	YES	2015	MWM	H	51	49	NonAIDS	8	5.99	307	307	5	129	SIDEFF	INSTI	2N+1II	8	0	70	62	8		874							672	1.3	YES	YES									1.3
110999983719	2015	YES	VIH		NO	NO	NO	2015	Woman	F	34	32	NonAIDS	4.53	4.7	487	495	18	561	Other	INNTI	2N+1NN	14	70	260	176	84		793				580	1.66	NO	770	1.3	NO	YES	743	1.3	YES	YES	1000	1.3	YES	1.3	1.66
110999983724	2015	YES	VIH		ND	ND	NO	2015	Woman	F	58	57	NonAIDS	5.86	5.86			10	326	Failure	INSTI	2N+1II	22	6			28		430									NO										2.1
110999983732	2015	YES	VIH		NO	NO	NO	2015	MWM	H	37	35	NonAIDS	4.62	4.62	534	534	18	571	Other	INNTI	2N+1NN	22	3	288	263	25		840														YES	918	1.52	YES	1.3
110999983750	2015	YES	VIH		YES	NO	NO	2015	MWW	H	60	58	NonAIDS	5.11	5.49	263	197	27	817		INSTI	2N+1II	15	84			99		874														NO				1.7
110999983754	2015	YES	VIH		YES	YES	NO	2015	MWM	H	32	30	NonAIDS	5.25	5.25	162	162	23	694	Intensification	INNTI	2N+1NN	42	4	231	185	46		805	369	3.34	NO	444	2.58	NO	357	1.3		YES	379	1.46	YES		592	1.48	YES
110999983763	2015	YES	VIH		ND	ND	NO	2015	Woman	F	49	47	NonAIDS		4.43		92	20	600	Simplification	IPb	2N+1IPb	93	13	203	97	106		823	142	2.47	NO	103	1.3	YES	152	1.3		YES					302	1.3	YES
110999983766	2015	YES	VIH		NO	NO	NO	2015	Woman	F	35	33	NonAIDS	4.26	4.23	1528	1558	29	867		Other	2N	67	32	215	116	99		778	1589	1.79	NO
110999983775	2015	YES	VIH		NO	NO	NO	2015	MWM	H	30	28	NonAIDS	4.7	4.7	415	415	27	827	Other	INSTI	2N+1II	12	0	102	90	12		827	540	1.67	NO	474	1.3	YES	586	1.3	YES	YES									1.3
110999983819	2015	YES	VIH		ND	ND	NO	2012	Woman	F	32	27	NonAIDS		3.58		444	13	406	SIDEFF	INSTI	2N+1II	975	91	1283	217	1066		868	850	1.3	YES												1088	1.3	YES
110999983826	2015	NO	VIH		NO	NO	NO	2015	MWM	H	45	44	NonAIDS	5.2	5.2	1081	1081	29	874		INSTI	2N+1II	11	6	108	91	17		189	703	1.34	YES	735	1.3	YES
110999983829	2015	YES	VIH		YES	YES	NO	2015	MWM	H	33	31	NonAIDS	5.3	5.3	180	180	7	216	Simplification	IPb	2N+1IPb	46	8	872	818	54		828	258	3.3	NO
110999983832	2015	YES	VIH		YES	NO	NO	2015	MWM	H	32	30	NonAIDS	4.67	4.67	239	239	4	115	Simplification	IPb	2N+1IPb	5	6	119	108	11		783
110999983842	2015	YES	VIH		NO	NO	NO	2015	MWW	H	48	46	NonAIDS	4.74	4.74	358	358	22	645	Simplification	Other	1NN+1II	9	20	146	117	29		843							432	1.43		YES	441	1.3	YES
110999983854	2015	YES	VIH&HEP	VHC	YES	YES	NO	2015	MWW	H	46	44	AIDS	4.84	4.84	11	11	29	872		IPb	2N+1IPb	29	0	387	358	29	4	770	162	3.58	NO								215	1.3	YES
110999983860	2015	YES	VIH		YES	NO	NO	2015	MWM	H	52	50	NonAIDS	4.8	4.77	212	212	31	945	Other	INNTI	2N+1NN	21	11	129	97	32		698	379	2.2	NO	359	1.3	YES	599	1.3		YES
110999983861	2015	YES	VIH		YES	NO	NO	2015	MWM	H	23	21	NonAIDS	4.11	4.11	340	340	29	865		Other	2N	0	6	106	100	6		787	796	2.42	NO	984	1.3	YES
110999983863	2015	YES	VIH		NO	NO	NO	2015	MWM	H	28	26	NonAIDS	4.35	4.35	893	893	27	812	Other	INNTI	2N+1NN	5	14	181	162	19		830									YES					YES	1011	1.3	YES	1.3	1.3
110999983871	2015	YES	VIH		ND	ND	NO	2010	MWM	H	42	35	AIDS		5.14		44	2	49	Other	INSTI	2N+1II	1890	0	1911	21	1890	1887	752	44	1.3	YES				114	1.3		YES
110999983891	2015	YES	VIH		YES	NO	NO	2015	MWM	H	34	32	NonAIDS	4.25	4.6	254	263	23	672	Other	IPb	2N+1IPb	0	35	91	56	35		847							314	1.6		YES				YES				1.6
110999983927	2015	YES	VIH&HEP	VHB	YES	YES	NO	2015	MWW	H	49	47	AIDS	5.31	5.31	162	316	4	128	SIDEFF	IPb	2N+1IPb	73	27	237	137	100	84	821	306	3.2	NO	158	2.4	NO	145	1.3	NO	YES	421	1.83	NO	NO				1.8	2.3
110999983964	2015	YES	VIH&SS		NO	NO	NO	2015	MWM	H	36	34	NonAIDS	4.75	4.75	433	433	25	745	Other	INSTI	2N+1II	8	4	77	65	12		769	598	1.66	NO	765	1.3	YES	912	1.3		YES
110999983969	2015	YES	VIH		YES	YES	NO	2015	MWW	H	51	49	NonAIDS	5.39	5.39	151	151	28	825		INSTI	2N+1II	0	8	113	105	8		696	244	1.9	NO				349	1.3		YES
110999983985	2015	YES	VIH		YES	NO	NO	2015	Woman	F	43	41	NonAIDS	3.95	3.95	293	293	29	869	Other	INNTI	2N+1NN	22	3	87	62	25		816											633	1.3	YES		548	1.7	NO
110999983986	2015	YES	VIH		NO	NO	NO	2015	Woman	F	46	44	NonAIDS	4.4	4.4	466	466	29	872	Other	INNTI	2N+1NN	11	16	120	93	27		720	422	2.28	NO	546	1.3	YES					557	1.3	YES	YES				1.3
110999984015	2015	YES	VIH		NO	NO	NO	2015	MWM	H	26	24	NonAIDS	4	4	457	457	21	657	SIDEFF	INNTI	2N+1NN	1	3	186	182	4		758	683	2.43	NO	617	1.79	NO	523	1.3	YES	YES									1.3
110999984025	2015	YES	VIH		YES	YES	NO	2015	MWM	H	41	39	AIDS	5	5	28	28	23	708	Other	INSTI	2N+1II	6	7	116	103	13	14	771
110999984040	2015	YES	VIH		NO	NO	NO	2015	MWW	H	44	42	NonAIDS	4.5	4.47	382	259	29	888	Other	INNTI	2N+1NN	14	0	131	117	14		607	371	2.08	NO				379	1.3	YES	YES									1.3
110999984047	2015	YES	VIH		ND	ND	NO	2010	MWM	H	35	28	NonAIDS		4.88		354	26	787		INSTI	2N+1II	1828	20			1848		444
110999984049	2015	YES	VIH		NO	NO	NO	2015	MWW	H	45	43	NonAIDS	4.9	4.9	577	577	17	512	Other	INSTI	2N+1II	49	0	197	148	49		752											623	6.5	NO	YES				1.3
110999984078	2015	YES	VIH		NO	NO	YES	2015	MWM	H	28	27	NonAIDS	3.43	3.43	497	497	27	795		INSTI	2N+1II	21	2	37	14	23		415				690	1.6	YES	607	1.3		YES
110999984080	2015	YES	VIH		NO	NO	NO	2015	MWM	H	31	29	NonAIDS	7	6.3	539	539	6	211	Simplification	IPb	2N+1IPb	0	5	259	254	5		715
110999984112	2015	YES	VIH		NO	NO	NO	2015	Woman	F	39	37	NonAIDS	4.76	4.76	433		26	786		INNTI	2N+1NN	4	0	381	377	4		692	433	2.42	NO								390	1.3	YES
110999984130	2015	YES	VIH		NO	NO	NO	2015	MWM	H	49	47	NonAIDS	3.63	3.63	951	951	25	761		INNTI	2N+1NN	9	14	85	62	23		707							1083	1.3		YES				YES	1361	1.3	YES	1.3
110999984136	2015	YES	VIH		NO	NO	NO	2015	Woman	F	42	40	NonAIDS	4.4	4.12	380	380	2	45	Other	Other	2N	10	3	189	176	13		676							536	1.3	YES	YES									1.3
110999984137	2015	YES	VIH		NO	NO	NO	2015	MWM	H	37	35	NonAIDS	3.53	3.53	421	421	24	725		Other	2N	24	47	161	90	71		620				411	1.3	YES
110999984138	2015	NO	VIH		YES	YES	NO	2015	Woman	F	51	51	AIDS	6.03	6.03	107	106	0	10	Other	Other	2N+1II+1IE	51	11			62	62	0
110999984150	2015	YES	VIH		ND	ND	NO	2014	Woman	F	45	42	AIDS		4.8		197	0	7	Failure	INSTI	2N+1II	408	12	593	173	420	497	444				286	1.66	NO	312	1.3		YES
110999984153	2015	YES	VIH		YES	NO	NO	2015	MWM	H	39	37	NonAIDS	4.61	4.65	229	215	5	162	Other	IPb	2N+1IPb	6	7	443	430	13		639	355	3.09	NO
110999984156	2015	YES	VIH		YES	NO	NO	2015	MWM	H	31	30	NonAIDS	5.39	5.31	259	271	25	756		IPb	2N+1IPb	13	7			20		365	316	3.38	NO
110999984178	2015	YES	VIH		YES	NO	NO	2015	MWM	H	35	34	NonAIDS	4.43	4.34	300	260	23	689		INSTI	2N+1II	3	69			72		69
110999984179	2015	YES	VIH		YES	YES	NO	2015	MWW	H	26	24	NonAIDS	5.45	5.45	153	153	8	240	SIDEFF	IPb	2N+1IPb	4	7	685	674	11		717	285	2.96	NO												273	1.34	YES
110999984201	2015	YES	VIH		YES	YES	NO	2015	Woman	F	47	45	NonAIDS	5.19	6.1	198	232	16	509	Other	Other	4N+2IPb	20	39	227	168	59		717	380	3.1	NO	305	2.3	NO	211	1.3		YES					312	1.3	YES
110999984203	2015	YES	VIH		NO	NO	NO	2015	MWM	H	28	26	NonAIDS	4.85	4.85	383	383	25	748		INSTI	2N+1II	30	4			34		657	589	2.15	NO
110999984225	2015	YES	VIH		NO	NO	NO	2015	MWM	H	37	35	NonAIDS	4.72	4.3	724	484	16	504	Other	Other	3N+1IPb	1	47	300	252	48		721	491	3	NO	625	2.57	NO	467	1.38		YES					519	1.3	YES
110999984235	2015	YES	VIH		NO	NO	NO	2015	MWM	H	21	19	NonAIDS	4.54	4.7	576	477	0	10	SIDEFF	Other	4N+1IPb	44	47	153	62	91		734	418	1.79	NO								438	1.3	YES
110999984236	2015	YES	VIH		YES	NO	NO	2015	MWM	H	29	27	NonAIDS	4.59	4	263	216	17	504	Other	Other	4N+1IPb	9	39	132	84	48		711	273	2.24	NO	341	1.3	YES									460	1.3	YES
110999984237	2015	YES	VIH		ND	ND	NO	2015	MWM	H	29	27	NonAIDS		4.8		593	16	504	Other	IPb	2N+1IPb	127	53	684	504	180		725	538	2.57	NO	650	2.2	NO	853	2	NO	NO					515	1.3	YES		2.53
110999984242	2015	YES	VIH&HEP	VHB	YES	YES	NO	2015	Woman	F	43	41	NonAIDS	4.1	4.03	9	19	26	790	Failure	Other	1N+1IPb	6	21	41	14	27		756				44	1.3	YES			YES										1.3
110999984248	2015	NO	VIH		YES	YES	NO	2015	MWM	H	35	34	AIDS	4.67	4.67	49	49	25	738		INSTI	2N+1II	20	1	82	61	21	0	299							188	1.3	YES	YES	251	1.3	YES						1.3
110999984253	2015	YES	VIH		ND	ND	NO	2011	MWM	H	40	34	NonAIDS		4.97		440	22	671		INNTI	2N+1NN	1779	62	2445	604	1841		719
110999984297	2016	YES	VIH		NO	NO	NO	2015	MWW	H	64	62	NonAIDS	4.32	4.6	950	950	20	586		INNTI	2N+1NN	86	137			223		670
110999984311	2016	YES	VIH		YES	NO	NO	2015	MWW	H	42	40	NonAIDS	4.78	4.78	306	306	7	198	Simplification	IPb	2N+1IPb	90	14	702	598	104		622							533	1.43		YES					519	1.9	NO
110999984371	2014	YES	VIH		ND	ND	NO	2014	Woman	F	26	23	NonAIDS		3.73		360	13	394	Simplification	INNTI	2N+1NN	172	42	271	57	214		776	448	2	NO						NO										3.73
110999984423	2016	YES	VIH		ND	ND	NO	2015	Woman	F	53	51	NonAIDS		3.94		782	4	145	SIDEFF	Other	2N	337	17	471	117	354		414	938	1.99	NO
110999984513	2016	YES	VIH		NO	NO	NO	2015	Woman	F	68	66	AIDS	3.9	3.2	390	369	16	474		IPb	2N+1IPb	170	195	394	29	365	167	433	247	1.6	YES
110999984561	2016	YES	VIH		ND	ND	NO	2015	MWW	H	46	44	NonAIDS		4.99		352	21	627		INSTI	2N+1II	113	14	195	68	127		498	485	1.57	YES				463	1.3	YES	YES									1.3
110999984584	2016	YES	VIH		ND	ND	NO	2015	Woman	F	32	30	NonAIDS		3.21		919	1	32	Simplification	IPb	2N+1IPb	383	4	450	63	387		545				837	1.3	YES					875	1.3	YES		893	1.3	YES
110999984699	2016	YES	VIH		ND	ND	NO	2010	MWW	H	60	53	NonAIDS					15	453	Intensification	IPb	2N+1IPb	2324	0	2908	584	2324		593				338	1.61	NO									266	1.36	YES
110999984982	2016	YES	VIH		ND	ND	NO	2015	MWM	H	34	32	NonAIDS		4.49		971	16	469		INNTI	2N+1NN	512	25			537		424				1789	1.92	NO
110999985052	2016	YES	VIH		ND	ND	NO	2015	MWM	H	30	28	NonAIDS		4.49		222	5	168	Failure	Other	1IPb	279	19	580	282	298		446
110999985117	2016	YES	VIH		ND	ND	NO	2015	MWM	H	36	34	NonAIDS		5		1142	9	281	Simplification	IPb	2N+1IPb	330	17	533	186	347		417				994	1.85	NO	1132	1.3		YES	981	1.3	YES
110999985120	2016	YES	VIH		ND	ND	NO	2014	Woman	F	20	17	NonAIDS		4.11		388	6	197	Simplification	IPb	2N+1IPb	843	0	941	98	843		441	452	1.89	NO	383	1.3	YES	453	1.3		YES
110999985154	2016	YES	VIH		ND	ND	NO	2015	MWM	H	25	23	NonAIDS		3.38		261	14	413		Other	2N	330	35	395	30	365		372
110999985277	2016	NO	VIH		ND	ND	NO	2010	MWM	H	47	40	NonAIDS		4.58		480	1	37	Simplification	Other	2N+1IE	2518	0	2587	69	2518		188	682	2.02	NO
110999985335	2014	NO	VIH&AUTRE		YES	YES	NO	2014	MWW	H	42	39	AIDS	5.2	5.2	256	256	3	79	SIDEFF	INNTI	2N+1NN	0	29	212	183	29	0	1048		2.1	NO					1.3		YES
110999985342	2016	YES	VIH		ND	ND	NO	2013	Woman	F	21	17	NonAIDS		5.97		92	3	91	Other	INSTI	2N+1II	1274	4	1641	363	1278		367	223	2.76	NO	227	3.47	NO	248	2.29		NO	394	1.3	YES
110999985347	2016	NO	VIH		ND	ND	NO	2012	Woman	F	37	32	NonAIDS		1.3		477	3	83	Simplification	IPb	2N+1IPb	1809	0	1809	0	1809		125	457	1.3	YES
110999985503	2014	NO	VIH		YES	YES	NO	2014	MWW	H	37	34	NonAIDS	5.6	5.6	81	81	33	980	Simplification	IPb	2N+1IPb	5	14			19		1038	156	3.5	NO	189	2.05	NO			NO										2.5
110999985519	2015	YES	VIH		NO	NO	NO	2015	MWM	H	25	23	NonAIDS	4.53	4.53	972	972	26	783		INSTI	2N+1II	0	14	43	29	14		706	1419	1.6	YES	1320	1.6	YES									1261	1.3	YES
110999985617	2017	NO	VIH		ND	ND	NO	2010	Woman	F	29	22	NonAIDS		3.4		1078	10	280		INNTI	2N+1NN	2452	25			2477		162
110999985714	2017	NO	VIH		ND	ND	NO	2010	Woman	F	24	17	AIDS		6.1		11	0	13	SIDEFF	IPb	2N+1IPb	2457	125	2784	202	2582	2449	256	32	3.1	NO	25	2.61	NO	24	1.53		YES
110999985757	2017	NO	VIH&AUTRE		ND	ND	NO	2010	MWW	H	42	35	AIDS		6.29		89	1	25	SIDEFF	IPb	2N+1IPb	2649	40			2689	2670	260	4	2.58	NO	58	2.59	NO	77	2.42		NO
110999985839	2017	NO	VIH&HEP	VHB	ND	ND	NO	2015	Woman	F	22	20	AIDS		2.06		453	1	12	Failure	INSTI	2N+1II	701	5	896	190	706	700	202	305	1.83	NO	379	2.55	NO
110999985866	2017	NO	VIH		ND	ND	NO	2013	MWW	H	35	31	NonAIDS		1.3		307	7	195		IPb	2N+1IPb	1439	27	1459	-7	1466		139
110999985911	2017	NO	VIH		ND	ND	NO	2011	MWM	H	35	29	AIDS		5.62		30	7	206		INSTI	2N+1II	2184	2	2470	284	2186	2186	125	91	2.45	NO
110999986017	2017	NO	VIH		ND	ND	NO	2014	Woman	F	34	31	NonAIDS		6.3			6	195	Other	INSTI	2N+1II	1281	7	1379	91	1288		104	214	2.42	NO	261	1.3	YES
110999986187	2017	NO	VIH		YES	NO	NO	2015	MWM	H	38	36	AIDS		4.81	237	61	1	21	Other	INSTI	2N+1II	938	5			943	949	40	116	2.56	NO
110999986326	2015	YES	VIH		ND	ND	NO	2015	MWM	H	25	23	NonAIDS		2.78		455	19	580	Other	INSTI	2N+1II	99	13	132	20	112		819				664	1.3	YES									580	1.3	YES
110999986658	2017	NO	VIH		ND	ND	NO	2013	MWW	H	40	36	NonAIDS					1	23		INSTI	2N+1II	1629	9			1638		21
110999986744	2017	NO	VIH		ND	ND	NO	2013	MWM	H	35	31	AIDS		6.02		31	1	3		INSTI	2N+1II	1652	6			1658	1651	5	197	2.39	NO
120006474793	2011	YES	VIH		YES	YES	NO	2011	Trans H vers F	Trans H vers F	34	28	NonAIDS	5.62	5.62	44	44	30	887	SIDEFF	IPb	2N+1IPb	14	0	209	195	14		2273							236	1.3		YES	312	1.6	YES		440	1.3	YES
120008281887	2013	NO	VIH		ND	ND	NO	2010	MWW	H	37	31	NonAIDS		3.14		136	59	1781		IPb	2N+1IPb	976	0	1169	193	976		1110	101	1.94	NO	150	1.34	YES	130	1.3		YES
120013149441	2012	YES	VIH		NO	NO	NO	2012	MWW	H	50	45	NonAIDS	3.56	3.56	773	773	11	329	Simplification	IPb	2N+1IPb	36	21	359	302	57		1932									YES		800	1.3	YES	YES				1.3	1.3
120015377224	2012	NO	VIH		ND	ND	NO	2011	Woman	F	36	34	NonAIDS		1.3		297	61	1848		IPb	2N+1IPb	370	21	379	-12	391		164														YES				1.3
120015606106	2012	YES	VIH		YES	NO	NO	2012	MWW	H	51	46	AIDS	2.57		479		6	211	SIDEFF	IPb	2N+1IPb	3	15	341	323	18	3	1976															420	1.3	YES
120015697957	2011	YES	VIH		NO	NO	NO	2011	Trans H vers F	Trans H vers F	44	38	NonAIDS	4.58	4.45	561	490	55	1657		INNTI	2N+1NN	98	665	1240	477	763		2254	560	2.35	NO	550	1.71	NO			NO					NO				4.48	4.19
120017177821	2012	YES	VIH		NO	NO	NO	2012	MWM	H	27	25	NonAIDS	5.72	5.71	810	512	60	1798		IPb	2N+1IPb	34	210			244		623				771	3.4	NO	648	2.3		NO
120017559231	2011	YES	VIH		YES	NO	NO	2011	Woman	F	25	22	NonAIDS	4.61	4.64	319	254	6	182	SIDEFF	IPb	2N+1IPb	22	41	226	163	63		979
120021740139	2012	YES	VIH		NO	NO	NO	2012	MWM	H	24	22	NonAIDS	5.13	5.07	671	854	7	212	Simplification	Other	2N+1IPb+1II	18	152	214	44	170		819							800	1.3		YES				YES				1.3
120023763538	2011	YES	VIH		NO	NO	NO	2011	MWW	H	39	35	NonAIDS	5.52	5.76	519	477	72	2169		IPb	2N+1IPb	24	159	591	408	183		1294	707	3.38	NO	603	3.37	NO	618	2.05		NO	733	1.6	YES	NO				2.05
120024501980	2012	YES	VIH		ND	ND	NO	2012	Woman	F	43	38	NonAIDS		4.32		140	8	264	SIDEFF	IPb	2N+1IPb	238	392	712	82	630		1807				220	1.3	YES
120028759182	2010	YES	VIH		NO	NO	NO	2010	Woman	F	30	23	NonAIDS	3.09	4.45	764	470	12	343	SIDEFF	INNTI	2N+1NN	14	1099	1313	200	1113		2603									NO						710	1.3	YES		2.96
120031536341	2012	YES	VIH		NO	NO	NO	2012	Woman	F	38	33	NonAIDS	3.08	2.64	889	750	1	27	SIDEFF	INNTI	2N+1NN	29	970	845	-154	999		1852											753	2.6	NO		830	2.6	NO
120031898141	2010	YES	VIH		NO	NO	NO	2010	Woman	F	51	44	NonAIDS		3.82	1195	1500	39	1158		INNTI	2N+1NN	154	1589	1951	208	1743		2667	1820	2.7	NO	1350	1.83	NO								NO				4.1
120032615126	2013	YES	VIH		ND	ND	NO	2012	Woman	F	33	28	NonAIDS		3.06		590	3	93	Other	INNTI	2N+1NN	113	147	290	30	260		1752	660	1.3	YES				540	1.6		YES					730	1.56	YES
120033077419	2011	YES	VIH&HEP	VHB	NO	NO	NO	2011	MWW	H	50	44	NonAIDS	4.98	5.33	429	292	73	2210		INSTI	2N+1II	8	21	192	163	29		2141	791	1.74	NO	693	1.94	NO			YES										1.3
120033153713	2010	YES	VIH		NO	NO	NO	2010	Woman	F	39	32	NonAIDS	4.61	4.5	719	640	23	693	Simplification	IPb	2N+1IPb	40	385	530	105	425		2757	820	2.37	NO						NO					NO	1198	1.3	YES	4.17	4.4
120033758045	2012	NO	VIH		ND	ND	NO	2010	MWM	H	31	28	NonAIDS		4.13			0	7	SIDEFF	INNTI	2N+1NN	658	7			665		343
120034675241	2012	YES	VIH		YES	YES	NO	2012	MWW	H	42	37	AIDS	5.4	5.45	32	32	66	1991		INSTI	2N+1II	50	38	210	122	88	50	1995	162	2.16	NO	129	1.69	NO	198	1.72	NO	NO	220	1.34	YES		370	1.6	YES		1.69
120040798367	2012	YES	VIH		NO	NO	NO	2012	MWM	H	36	32	NonAIDS	4.59	4.13	820	580	52	1580		INNTI	2N+1NN	132	420	622	70	552		1472									NO										5.29
120044674159	2010	NO	VIH		ND	ND	NO	2010	MWW	H	45	38	NonAIDS		5.25		70	6	189	Failure	INSTI	2N+1II	98	1612	2088	378	1710		2614	150	2.68	NO	130	1.91	NO	120	1.98		NO	160	1.3	YES		240	2.1	NO
120046337367	2012	YES	VIH		NO	NO	NO	2012	Trans H vers F	Trans H vers F	32	28	NonAIDS	3.38	3.4	386	320	5	161	Simplification	IPb	2N+1IPb	102	763	1069	204	865		1582	300	1.3	YES												610	1.3	YES
120050040842	2010	YES	VIH&HEP	VHC	YES	YES	NO	2010	MWW	H	35	28	AIDS	5.46	5.46	11	11	3	90	Other	INNTI	2N+1NN	0	13	217	204	13	0	2777														YES				1.3
120050609768	2011	YES	VIH		YES	YES	NO	2011	MWW	H	45	39	NonAIDS	4.97	4.69	166	183	8	242	Simplification	INNTI	2N+1NN	13	15	157	129	28		2428														YES				1.3
120050792873	2010	NO	VIH		ND	ND	NO	2010	Woman	F	28	21	NonAIDS		4.42		246	39	1179	Simplification	IPb	2N+1IPb	118	0	191	73	118		2603									YES										1.3
120052403748	2012	NO	VIH		NO	NO	NO	2012	Woman	F	32	27	NonAIDS	4.8	4.8	456	456	63	1909		IPb	2N+1IPb	56	0			56		1847
120053326130	2012	YES	VIH&HEP	VHC	YES	NO	NO	2011	MWM	H	47	41	NonAIDS	5.56	5.56	333	250	68	2063		INSTI	2N+1II	128	35	315	152	163		1840											507	1.5	YES
120057781399	2011	NO	VIH		ND	ND	NO	2011	MWM	H	60	54	NonAIDS		4.3		691	33	987	Other	INSTI	2N+1II	170	1300	2134	664	1470		2287									NO										3.71
120061687649	2012	YES	VIH		YES	NO	NO	2012	MWW	H	76	73	NonAIDS	5.1	5.1	233	233	0	1	Other	INNTI	2N+1NN	53	0			53		1183														NO				5.1
120065238595	2010	YES	VIH		NO	NO	YES	2010	MWM	H	36	29	NonAIDS		4.86		457	39	1202	Simplification	INSTI	2N+1II	170	261	660	229	431		2540									NO						725	1.3	YES		4.99
120065284193	2010	NO	VIH&HEP	VHB	NO	NO	NO	2010	Trans H vers F	Trans H vers F	36	29	NonAIDS	4.62	5.7	646	540	14	434	SIDEFF	IPb	2N+1IPb	116	2240	2631	275	2356		2716	340	3	NO	370	2.9	NO
120068380237	2011	YES	VIH		NO	NO	YES	2011	MWM	H	30	24	NonAIDS	5.3	5.11	555	440	39	1196	SIDEFF	INNTI	2N+1NN	22	54	236	160	76		2223
120070379138	2011	YES	VIH&HEP	VHC&VHB	NO	NO	NO	2011	MWM	H	47	41	NonAIDS	4.52	4.6	529	539	24	742	Other	INSTI	2N+1II	34	321	440	85	355		2383	440	2.01	NO	477	1.3	YES	535	1.3		YES	790	1.3	YES		450	1.3	YES
120070385158	2012	YES	VIH		NO	NO	YES	2012	MWW	H	50	45	AIDS	6.5	6.85	18	19	10	292	SIDEFF	IPb	2N+1IPb	12	25	739	702	37	3	1842	63	3.26	NO	117	2.06	NO	380	1.87		NO	320	1.3	YES	YES	260	1.4	YES	1.6
120070411325	2010	YES	VIH		YES	YES	NO	2010	MWW	H	47	40	NonAIDS	4.35	4.35	106	106	45	1399	Failure	INNTI	2N+1NN	43	18	158	97	61		2559	241	1.61	NO	182	1.3	YES								YES	146	1.3	YES	1.3
120071880520	2010	YES	VIH		YES	YES	NO	2010	MWW	H	54	47	NonAIDS	4.97	4.97	93	93	50	1519	Simplification	IPb	2N+1IPb	4	14	158	140	18		2709	216	2.56	NO
120072612942	2010	YES	VIH		NO	NO	NO	2010	MWM	H	40	33	NonAIDS	3.92	3.69	933	1010	10	290		INSTI		1	2298	2327	28	2299		2508	1050	1.3	YES
120073696316	2011	YES	VIH&HEP	VHB	YES	YES	NO	2011	MWW	H	36	30	AIDS	3.83				20	616	Simplification	IPb	2N+1IPb	7	3	101	91	10	19	2118				63	1.3	YES	91	1.3		YES					250	1.5	YES
120073979676	2011	YES	VIH		ND	ND	NO	2010	Woman	F	30	23	NonAIDS		3.96		118	3	91	Simplification	INNTI	2N+1NN	408	84	1290	798	492		2317
120074213565	2010	YES	VIH		NO	NO	NO	2010	MWM	H	46	39	NonAIDS	4.53	5.11	631	604	74	2246		INNTI	2N+1NN	63	599	880	218	662		2827	540	2.86	NO				833	2.15	NO	NO					1030	1.3	YES		4.53
120079855621	2012	YES	VIH		ND	ND	NO	2012	MWM	H	28	23	NonAIDS					61	1843		INNTI	2N+1NN	30	61	405	314	91		1830															490	1.3	YES
120080013454	2010	YES	VIH		YES	NO	NO	2010	Woman	F	34	27	NonAIDS	4.17	3.51	242	174	78	2395	Simplification	IPb	2N+1IPb	47	15	180	118	62		2619									YES						239	1.3	YES		1.3
120080120266	2012	YES	VIH		YES	NO	NO	2012	MWW	H	67	62	NonAIDS	6.69	5.77	267	480	37	1113	SIDEFF	INSTI	2N+1II	30	26	169	113	56		2066	507	1.99	NO	472	2.02	NO			NO										1.7
120080235780	2013	YES	VIH		NO	NO	NO	2013	MWM	H	32	31	NonAIDS	3.87	4.23	543	610	54	1623		INNTI	2N+1NN	11	168	615	436	179		616	560	1.43	YES								700	1.3	YES	YES				1.3
120082287014	2011	YES	VIH		ND	ND	NO	2010	Woman	F	32	25	NonAIDS		6.07		420	82	2479	Simplification	IPb	2N+1IPb	172	7	1650	1471	179		2444	665	3.14	NO	753	3.09	NO			NO										6.07
120085068465	2011	YES	VIH		ND	ND	NO	2010	Woman	F	40	33	NonAIDS		2.19		461	7	216	Simplification	IPb	2N+1IPb	249	21	360	90	270		2344											445	1.3	YES	YES	652	1.3	YES	1.3
120089916408	2010	YES	VIH		NO	NO	NO	2010	MWW	H	36	29	NonAIDS	3.21	3.5	429	360	51	1543		INNTI	2N+1NN	27	1337	1392	28	1364		2863	410	1.3	YES	410	1.3	YES			NO										3.33
120096676112	2012	YES	VIH		YES	YES	NO	2012	MWM	H	31	26	AIDS	5.79	5.79	16	16	9	281	Simplification	IPb	2N+1IPb	2	19	166	145	21	2	2005									YES										1.3
120098964870	2010	YES	VIH		NO	NO	NO	2010	MWM	H	28	26	NonAIDS	6.48	6.48	383	383	11	343	Other	IPb	2N+1IPb	35	0	568	533	35		744	724	4.24	NO											NO	709	1.3	YES	1.8
120099529744	2011	YES	VIH		NO	NO	YES	2011	MWM	H	43	38	NonAIDS	5.92	5.2	853	532	49	1475		INNTI	2N+1NN	36	1036	1257	185	1072		2043	569	2.7	NO				863	1.3		YES
120099834621	2012	YES	VIH		ND	ND	NO	2012	Woman	F	33	28	NonAIDS		5.06		280	31	930	Simplification	IPb	2N+1IPb	127	61	447	259	188		1992	431	3.26	NO	452	2.45	NO			NO										5.06
120103724063	2011	YES	VIH		YES	NO	NO	2011	MWW	H	50	44	NonAIDS	5.17	5.17	347	347	29	875	Simplification	INNTI	2N+1NN	50	21	1106	1035	71		1909				515	2.86	NO			NO										2.86
120104351223	2011	YES	VIH		NO	NO	NO	2011	Woman	F	33	27	NonAIDS	4.52	4.69	504	398	33	987	Simplification	IPb	2N+1IPb	27	407	545	111	434		2394	429	2.26	NO
120106380701	2011	YES	VIH		ND	ND	NO	2010	Woman	F	35	28	NonAIDS	4.68	4.75			2	44	SIDEFF	IPb	2N+1IPb	64	0	688	624	64		2317	384	4.59	NO						NO		638	2.04	NO	NO				2.54	2.29
120106407285	2011	YES	VIH		NO	NO	NO	2011	MWW	H	32	26	NonAIDS	3.8	4.43	717	693	19	581	SIDEFF	INNTI	2N+1NN	6	357	551	188	363		2021							910	1.3		YES					820	1.3	YES
120107401431	2010	YES	VIH		YES	YES	NO	2010	MWW	H	33	26	NonAIDS	6.34	6.34	147	147	3	98	Other	IPb	2N+1IPb	18	0			18		2440	413	4.02	NO						NO						928	2.59	NO		2.83
120109717966	2013	YES	VIH		NO	NO	NO	2013	MWM	H	37	35	NonAIDS	5.33	4.8	485	300	4	112	Other	Other	2N	7	521	584	56	528		895	502	1.7	NO				630	1.7		NO
120112438381	2011	NO	VIH&HEP		YES	NO	NO	2011	Woman	F	28	28	NonAIDS	4.75	4.87	294	256	80	2407		INNTI	2N+1NN	43	0			43		0
120114177883	2011	YES	VIH		NO	NO	NO	2011	MWW	H	40	34	NonAIDS	2.1	5.76	451	285	64	1960	Other	IPb	2N+1IPb	15	106	932	811	121		2485
120118673206	2011	YES	VIH		NO	NO	NO	2011	MWM	H	38	32	NonAIDS	2.97	6	755	411	12	357	Simplification	IPb	2N+1IPb	29	581	841	231	610		2442															760	1.3	YES
120126288832	2010	YES	VIH		YES	YES	NO	2010	Woman	F	42	35	NonAIDS	3.56	3.56	123	123	58	1775	Other	INNTI	2N+1NN	25	41	101	35	66		2691	155	1.6	YES								207	1.3	YES	YES	230	1.3	YES	1.3
120130306483	2011	YES	VIH		NO	NO	NO	2011	MWM	H	43	37	NonAIDS	5.41	5.18	610	652	12	364	Simplification	IPb	2N+1IPb	20	85	341	236	105		2167	521	3.12	NO								1448	1.53	YES
120132802308	2010	YES	VIH		ND	ND	NO	2010	MWW	H	32	31	NonAIDS					94	2839		INNTI	2N+1NN	41	28			69		574
120137447536	2012	YES	VIH		NO	NO	NO	2012	MWM	H	32	27	NonAIDS	4.86	4.47	744	485	64	1930		INNTI	2N+1NN	6	211	574	357	217		2120											580	1.3	YES		690	1.3	YES
120141185940	2011	YES	VIH		YES	YES	NO	2010	MWW	H	45	38	AIDS	5.37	5.38	274	326	3	98	Other	INNTI	2N+2NN	64	55	426	307	119	68	2520	403	3.82	NO	351	2.23	NO
120142530799	2012	NO	VIH		NO	NO	NO	2011	MWM	H	51	47	NonAIDS	3.64	4.37	387	413	41	1252	Other	INNTI	2N+1NN	197	1	306	108	198		1302	441	1.88	NO						NO										4.51
120143001736	2011	YES	VIH		NO	NO	NO	2011	Woman	F	45	39	NonAIDS	5.45	5.79	502	412	38	1163	SIDEFF	IPb	2N+1IPb	8	147	290	135	155		2262	443	3.05	NO	517	1.93	NO			NO					YES				1.3	3.74
120144019544	2012	YES	VIH		NO	NO	NO	2012	MWM	H	37	32	NonAIDS	3.65	3.87	840	1040	55	1666	Simplification	INNTI	2N+1NN	49	329	763	385	378		1813														NO	1101	1.3	YES	3.87
120144812286	2012	YES	VIH&HEP	VHC	YES	YES	NO	2012	Trans H vers F	Trans H vers F	35	30	AIDS	6.26	5.9	185	215	0	8	Other	IPb	2N+1IPb	13	43	334	278	56	79	1891							355	1.58		YES					440	1.3	YES
120149135769	2011	YES	VIH		YES	NO	NO	2011	MWM	H	24	19	NonAIDS	7.23	7.23	272	272	47	1421	Simplification	IPb	2N+1IPb	5	12	202	185	17		1826	506	2.97	NO	675	2.36	NO	493	1.3		YES	703	1.3	YES		535	1.54	YES
120152355373	2011	YES	VIH		YES	YES	NO	2011	MWW	H	36	34	AIDS	5.74	5.74	6	6	76	2314		IPb	2N+1IPb	0	9			9	281	671	65	2.88	NO	89	3.33	NO	223	3.85	NO	NO	526	2.31	NO	NO	526	2.79	NO	2.31	3.85
120154323757	2012	YES	VIH		YES	YES	NO	2011	MWW	H	69	63	NonAIDS	5.37	5.61	176	197	17	525	SIDEFF	IPb	2N+1IPb	20	7	188	161	27		2091	317	2.86	NO	357	2.46	NO	335	1.3	YES	YES				YES	600	1.3	YES	1.3	1.3
120154533029	2010	YES	VIH		NO	NO	NO	2010	MWM	H	30	23	NonAIDS	4.05	4.4	989	808	42	1253		Other	2N	26	1344	1398	28	1370		2545	815	1.7	NO								870	1.3	YES		960	1.3	YES
120161007405	2011	YES	VIH&HEP	VHB	YES	YES	NO	2011	MWW	H	51	45	NonAIDS	5.18		120	120	83	2505		INNTI	2N+1NN	26	0	152	126	26		2468	167	3.05	NO	229	2.41	NO			NO						314	1.96	NO		2.18
120163259387	2010	YES	VIH		YES	YES	NO	2010	MWW	H	59	52	AIDS	5.97	6.27	25	25	5	163	Failure	INNTI	2N+1NN	4	14	367	349	18	2	2742				159	2.69	NO	173	2.28	NO	NO				YES				1.3	2.56
120167965114	2010	YES	VIH		YES	YES	NO	2010	Woman	F	62	55	NonAIDS	4.98	4.77	58	138	49	1493	Failure	IPb	2N+1IPb	8	34	162	120	42		2570	148	2.76	NO				164	1.3		YES				YES	96	1.3	YES	1.3
120167973817	2012	NO	VIH		NO	NO	YES	2012	Woman	F	34	34	NonAIDS		5.3	394	355	62	1872		IPb	2N+1IPb	40	101			141		101
120168621242	2012	YES	VIH&HEP	VHB	NO	NO	YES	2012	MWM	H	45	40	NonAIDS	4.78	4.78	291	291	8	245	SIDEFF	IPb	2N+1IPb	28	0	137	109	28		1729														YES	300	1.3	YES	1.3
120171276272	2011	YES	VIH		YES	YES	NO	2011	Trans H vers F	Trans H vers F	30	24	NonAIDS	4.97	4.97	113	113	36	1106	Simplification	IPb	2N+1IPb	39	49	270	182	88		2477	138	2.8	NO	141	2.01	NO	225	1.3	NO	YES	144	1.3	YES	YES				1.3	2.01
120172813535	2010	YES	VIH		YES	NO	NO	2010	Trans H vers F	Trans H vers F	39	32	NonAIDS	4.47	4.11	275	411	0	14	SIDEFF	INNTI	2N+1NN	28	192	742	522	220		2526														NO	492	1.3	YES	1.82
120177848280	2011	YES	VIH		ND	ND	NO	2011	Woman	F	27	21	NonAIDS		1.56		716	2	83	Other	IPb	2N+1IPb	123	63	123	-63	186		2205				723	1.3	YES			YES										1.56
120180640638	2012	YES	VIH		ND	ND	NO	2011	MWW	H	39	33	NonAIDS		5.52		407	33	1001	Simplification	IPb	2N+1IPb	539	189	1273	545	728		1913	367	4.13	NO	460	3.63	NO					720	1.3	YES		1020	1.3	YES
120180782497	2012	YES	VIH		YES	NO	NO	2012	Trans H vers F	Trans H vers F	37	32	NonAIDS	5.52	5.34	274	356	63	1909		IPb	2N+1IPb	22	62	293	209	84		1888									NO										2.19
120183330715	2012	YES	VIH		NO	NO	NO	2012	MWM	H	30	27	NonAIDS	5.59	5.59	511	511	1	33	Other	INNTI	2N+1NN	54	0	253	199	54		1134									YES						950	1.3	YES		1.38
120183722914	2010	YES	VIH		YES	NO	NO	2010	MWM	H	44	37	NonAIDS	5.08	5.12	346	373	28	858	Simplification	IPb	2N+1IPb	2	332	775	441	334		2736	431	2.93	NO	337	2.71	NO								NO				2.93
120184230984	2010	YES	VIH		YES	YES	NO	2010	Woman	F	48	41	NonAIDS	2.61		33	33	74	2260	Simplification	IPb	2N+1IPb	30	0	441	411	30		2533	155	2.61	NO											YES	234	1.3	YES	1.32
120188778162	2012	YES	VIH		ND	ND	NO	2012	Woman	F	33	29	NonAIDS		3.61		535	3	70	Other	IPb	2N+1IPb	349	56	601	196	405		1358
120190975368	2010	YES	VIH		NO	NO	NO	2010	MWW	H	36	29	NonAIDS	2.63	2.76	390	583	43	1316	Simplification	IPb	2N+1IPb	10	652	688	26	662		2509	681	1.3	YES
120191021204	2011	YES	VIH		ND	ND	NO	2011	MWW	H	37	31	NonAIDS		5.33		525	38	1134	Simplification	IPb	2N+1IPb	183	180	576	213	363		2309	571	2.68	NO	634	2.48	NO	1022	1.87	NO	NO				NO				5.33	4.26
120194667995	2011	YES	VIH		NO	NO	YES	2011	MWM	H	45	39	NonAIDS	4.09	4.6	577	386	44	1339	Other	INNTI	2N+1NN	10	205	362	147	215		2291	457	2.4	NO	421	1.61	NO			NO					YES	400	1.3	YES	1.3	4.86
120195808053	2010	YES	VIH		YES	NO	NO	2010	Woman	F	38	31	NonAIDS	4.73	4.53	307	362	3	91	Other	IPb	2N+1IPb	24	60	897	813	84		2707	463	2.25	NO	441	1.69	NO			NO						423	4.9	NO		1.69
120197689236	2010	YES	VIH		ND	ND	NO	2010	MWM	H	39	35	NonAIDS				341	82	2483		INNTI	2N+1NN	1	117	160	42	118		1386							520	1.3		YES					504	1.3	YES
120198476672	2010	YES	VIH		YES	YES	NO	2010	Woman	F	49	42	NonAIDS	6	6	51	32	48	1470	SIDEFF	IPb	2N+1IPb	15	7	295	273	22		2611	256	3.54	NO	261	2.42	NO			NO		345	2.05	NO		433	1.3	YES		1.9
120210720241	2012	YES	VIH		YES	YES	NO	2012	MWW	H	48	43	AIDS	2.87		111		3	87	Other	INNTI	2N+2NN	45	15	214	154	60	40	1943	111	2.87	NO	95	2.16	NO			NO						360	1.6	YES		1.72
120211742580	2011	YES	VIH		NO	NO	NO	2011	Woman	F	39	33	NonAIDS	2.77	3.58	1047	950	0	21	Other	IPb	2N+1IPb	28	1823	1977	126	1851		2344									NO		990	1.3	YES	NO				2.42	3.01
120212209046	2012	YES	VIH		NO	NO	NO	2011	Woman	F	36	33	NonAIDS	3.16	3.37	405	234	4	128	Simplification	IPb	2N+1IPb	29	378	78	-329	407		842							370	1.6		YES
120212215603	2011	YES	VIH		ND	ND	NO	2010	MWM	H	35	28	NonAIDS		6.03		193	60	1821	SIDEFF	INNTI	2N+1NN	463	32	1643	1148	495		2201	338	2.84	NO	371	2.73	NO
120212886989	2010	YES	VIH		YES	NO	NO	2010	Woman	F	31	24	NonAIDS	5.02	5.02	318	318	6	188	Other	IPb	2N+1IPb	23	18	411	370	41		2629				563	1.91	NO					590	1.38	YES	YES				1.48
120213695705	2011	YES	VIH		YES	NO	NO	2011	Woman	F	34	28	NonAIDS	4.84	4.78	229	163	76	2296		IPb	2N+1IPb	78	41	305	186	119		2233
120214519680	2012	YES	VIH		ND	ND	NO	2011	Woman	F	46	40	NonAIDS		5.44		19	10	308	Other	INNTI	2N+1NN	219	5	329	105	224		2010	116	3.1	NO				87	1.3		YES	108	0	YES	YES	130	1.3	YES	1.34
120218029201	2012	YES	VIH		NO	NO	NO	2012	MWM	H	36	31	NonAIDS	3.5	3.63	641	641	61	1862	Other	INNTI	2N+1NN	14	28	126	84	42		1865	838	2.36	NO	861	1.3	YES	870	1.3		YES
120219112635	2011	YES	VIH		YES	YES	NO	2011	MWW	H	42	36	AIDS	5.98	6.18	64	74	64	1949	Other	IPb	2N+1IPb	7	19	272	246	26	0	2176	293	2.96	NO	261	1.81	NO			YES					YES	510	1.3	YES	1.43	1.36
120220647693	2012	YES	VIH&HEP	VHC	ND	ND	NO	2012	MWM	H	32	27	NonAIDS		5.35		525	15	456	Other	IPb	2N+1IPb	183	0	483	300	183		1890				500	2.78	NO	504	1.79		NO				NO				1.79
120223308742	2010	YES	VIH		NO	NO	NO	2010	MWM	H	33	26	NonAIDS	4.95	4.51	423	238	75	2271		INNTI	2N+1NN	7	385	493	101	392		2651	353	2.91	NO
120226207912	2010	YES	VIH		YES	NO	NO	2010	MWM	H	47	40	NonAIDS	5.17	5.01	314	247	25	763	Other	INNTI	2N+1NN	160	21	405	224	181		2506	342	2.11	NO						NO										5.01
120229040802	2011	YES	VIH&HEP	VHB	NO	NO	NO	2010	Trans H vers F	Trans H vers F	31	24	NonAIDS	4	5.31	471	317	1	43	SIDEFF	IPb	2N+1IPb	208	385	722	129	593		2443				470	2.11	NO
120231223524	2010	YES	VIH		YES	YES	NO	2010	MWM	H	40	33	AIDS			218	215	3	98	Other	INNTI	2N+2NN	41	71	357	245	112	0	2555	254	1.85	NO	250	1.3	YES			YES					YES	365	1.3	YES	1.3	1.3
120233937562	2011	YES	VIH		NO	NO	NO	2011	MWW	H	47	41	NonAIDS	4	4	374	374	80	2436		IPb	2N+1IPb	40	49	342	253	89		2450	401	2.35	NO												451	1.3	YES
120238811672	2010	YES	VIH		YES	YES	NO	2010	MWW	H	38	31	NonAIDS	4.9	4.9	144	144	25	777	Other	IPb	2N+1IPb	15	0	205	190	15		2746	231	2.48	NO	301	2.05	NO	369	1.3		YES	385	1.3	YES
120240383327	2010	YES	VIH		YES	YES	NO	2010	MWM	H	33	26	NonAIDS	4.95	4.95	151	151	0	7	Other	IPb	2N+1IPb	0	12	200	188	12		2559				397	1.97	NO	359	1.3		YES	576	1.3	YES
120241360188	2013	YES	VIH		YES	YES	NO	2013	MWW	H	47	43	NonAIDS	4.26	4.26	179	179	45	1370	Simplification	IPb	2N+1IPb	12	23	96	61	35		1779	272	2.36	NO				250	1.3		YES	300	1.3	YES	NO	420	1.3	YES	1.66
120243206203	2010	YES	VIH		YES	YES	NO	2010	Woman	F	50	43	NonAIDS	6.07	6.07	84	84	1	42	SIDEFF	INNTI	2N+1NN	29	0	245	216	29		2807	308	2.97	NO												297	1.3	YES
120244350612	2012	YES	VIH		YES	YES	NO	2012	MWW	H	38	33	NonAIDS	6.15	6.15	11	11	21	647	Simplification	IPb	2N+1IPb	0	11	1145	1134	11		1566	113	3.57	NO												300	2.5	NO
120247997761	2011	YES	VIH		YES	YES	NO	2011	MWM	H	49	43	NonAIDS	4.26	4.32	150	180	29	858	Simplification	IPb	2N+1IPb	35	66	286	185	101		2457	134	2.39	NO	179	1.64	NO	263	1.3	NO	YES	280	1.36	YES	YES	401	1.3	YES	1.3	1.64
120250103176	2010	YES	VIH		YES	NO	NO	2010	Woman	F	38	31	NonAIDS	5.28	5.44	256	83	3	92	SIDEFF	IPb	2N+1IPb	9	62	394	323	71		2890							374	1.57		YES	379	1.53	YES	NO				1.62
120252662122	2011	YES	VIH		YES	YES	NO	2011	MWM	H	36	31	NonAIDS	5.05	4.95	151	195	6	181	Simplification	INNTI	2N+1NN	28	29	233	176	57		1901	258	2.79	NO				272	1.3		YES	274	1.3	YES		474	1.3	YES
120254935682	2010	YES	VIH		NO	NO	NO	2010	Woman	F	37	32	NonAIDS	4.61	4.53	422	380	17	519	SIDEFF	IPb	2N+1IPb	43	384	543	116	427		1843	520	2.15	NO						NO						590	1.3	YES		4.43
120257207215	2010	NO	VIH		ND	ND	NO	2010	Woman	F	47	45	NonAIDS					94	2835		IPb	2N+1IPb	9	0			9		953
120263012111	2012	YES	VIH		ND	ND	NO	2012	MWW	H	48	43	AIDS		5.76		14	11	320	Failure	IPb	2N+1IPb	126	7	258	125	133	153	1789	219	2.84	NO	158	2.11	NO	220	1.8		NO	310	1.3	YES
120271572292	2011	YES	VIH		YES	YES	NO	2011	Woman	F	47	41	AIDS	3.35		98		17	525	Simplification	IPb	2N+1IPb	2	8	243	233	10	0	2018	98	3.35	NO
120275641859	2012	YES	VIH		YES	YES	NO	2012	MWW	H	39	34	NonAIDS	5.28	5.28	105	113	39	1197	Simplification	IPb	2N+1IPb	22	0	572	550	22		2079	151	3.41	NO				275	1.52		YES	316	1.74	NO		290	1.3	YES
120279637575	2012	YES	VIH		NO	NO	NO	2012	MWW	H	32	31	NonAIDS	5.19	5.19	480	480	2	59	Simplification	INNTI	2N+1NN	34	28	240	178	62		504							540	1.3		YES
120281440377	2012	YES	VIH		NO	NO	NO	2012	MWM	H	23	21	NonAIDS	4.96	4.89	355	429	68	2068		IPb	2N+1IPb	11	28	547	508	39		773	337	2.61	NO
120283092678	2012	NO	VIH&HEP	VHB	YES	NO	NO	2012	MWW	H	61	60	AIDS	4.97	4.97	469	469	60	1796		IPb	2N+1IPb	2	42	244	200	44	8	315	545	2.9	NO
120284252346	2010	YES	VIH		NO	NO	NO	2010	MWM	H	46	39	NonAIDS	5.48	4.95	597	642	57	1754	Other	IPb	2N+1IPb	14	14	536	508	28		2636				603	2.18	NO								YES				1.4
120284496486	2012	YES	VIH		ND	ND	NO	2011	MWW	H	44	42	NonAIDS		3.9		453	52	1559		INNTI	2N+1NN	379	546			925		546														NO				4.5
120285349429	2012	YES	VIH		YES	YES	NO	2012	Woman	F	41	36	NonAIDS	4.57	4.57	143	143	7	197	Simplification	IPb	2N+1IPb	16	0	123	107	16		1855							433	1.3	YES	YES					470	1.3	YES		1.3
120285939515	2011	YES	VIH		YES	NO	NO	2011	MWM	H	38	36	NonAIDS	4.24	4.39	253	320	72	2191		INNTI	2N+1NN	56	28	591	507	84		535
120286159694	2011	YES	VIH		NO	NO	NO	2010	MWW	H	59	52	NonAIDS	4.96	5.53	371	12	3	99	SIDEFF	IPb	2N+1IPb	338	43	576	195	381		2137	28	4.84	NO	64	1.51	YES	109	1.3		YES
120287191272	2011	YES	VIH		ND	ND	NO	2011	MWM	H	33	27	NonAIDS		4.89		567	59	1768		INNTI	2N+1NN	265	465	869	139	730		2229														NO				4.76
120288245619	2011	YES	VIH		YES	YES	NO	2011	MWW	H	45	39	NonAIDS	5.66	5.81	62	67	20	622	Simplification	IPb	2N+1IPb	49	37	449	363	86		2108	172	3.26	NO				189	2		NO	203	1.3	YES	YES				1.36
120288433254	2010	YES	VIH		NO	NO	YES	2010	MWM	H	49	42	NonAIDS	5.6	5	658	417	22	685	Simplification	IPb	2N+1IPb	20	596	776	160	616		2537
120290212512	2011	YES	VIH		YES	NO	NO	2011	MWM	H	33	27	NonAIDS	5.67	5.45	336	343	2	49	SIDEFF	INNTI	2N+1NN	72	21	954	861	93		2263							516	2.56	NO	NO	623	1.93	NO						3.38
120290752590	2010	YES	VIH		YES	YES	NO	2010	MWW	H	49	44	AIDS					3	105	Simplification	INNTI	2N+2NN	4	11	274	259	15	1	1780							72	1.73	NO	NO	111	1.3	YES	YES	74	1.56	YES	1.3	1.73
120295788050	2011	YES	VIH		NO	NO	NO	2011	Woman	F	37	32	NonAIDS	1.3	1.3	629	509	1	29	Simplification	INNTI	2N+1NN	69	297	16	-350	366		1709														YES				1.3
120297008693	2012	YES	VIH		NO	NO	NO	2012	Woman	F	59	54	NonAIDS	5.34	5.34	421	421	23	698	Simplification	IPb	2N+1IPb	20	70	1042	952	90		2072				437	2.6	NO	440	2.06	NO	NO				NO				2.88	2.4
120297527492	2010	YES	VIH		ND	ND	NO	2010	MWM	H	36	34	AIDS		6.93		40	1	21	Other	Other	2N+1IPb+1II	228	13			241	229	850				247	2.53	NO	444	2.32		NO				NO				1.99
120299541652	2011	YES	VIH		NO	NO	NO	2011	Woman	F	43	37	NonAIDS	3.53	4	588	400	0	17	SIDEFF	IPb	2N+1IPb	65	1273	1746	408	1338		2196											380	1.78	NO
120299701512	2011	NO	VIH&HEP	VHC	YES	YES	NO	2011	MWM	H	23	23	NonAIDS	5.54	5.54	147	147	79	2390		IPb	2N+1IPb	27	11			38		126	277	3.81	NO	283	1.73	NO
120310268581	2012	NO	VIH		ND	ND	NO	2010	Woman	F	70	64	AIDS					0	14	Other	INNTI	2N+1NN	659	22	722	41	681	659	1434	288	1.4	YES
120310924709	2012	YES	VIH		YES	NO	NO	2012	MWM	H	38	34	AIDS	5.88	5.7	503	415	8	260	Other	INSTI	2N+1II	43	88	236	105	131	58	1449
120311672390	2012	YES	VIH		NO	NO	YES	2012	MWM	H	30	25	NonAIDS	5.5	4.9	621	550	42	1271		INSTI	2N+1II	5	632			637		1609							520	4.43		NO				NO				4.98
120317527414	2013	YES	VIH&HEP	VHB	YES	YES	NO	2012	MWW	H	47	42	NonAIDS	6.04	6.04	112	112	30	884	Failure	IPb	2N+1IPb	24	7	745	714	31		1777							310	1.72		NO	300	2.1	NO		470	1.5	YES
120319103480	2010	YES	VIH		YES	NO	NO	2010	Woman	F	33	26	NonAIDS	4.15	4.32	294	338	12	364	Simplification	IPb	2N+1IPb	20	24	111	67	44		2604	310	2.21	NO						YES										1.53
120321331203	2012	YES	VIH		ND	ND	NO	2012	MWW	H	63	58	NonAIDS		5.86		407	66	1990		INNTI	2N+1NN	156	17	701	528	173		1967	583	3.45	NO				923	1.86		NO				NO	1050	1.3	YES	1.86
120321416736	2012	YES	VIH		NO	NO	NO	2012	Trans H vers F	Trans H vers F	32	27	NonAIDS	3.49	3.8	529	590	21	652	SIDEFF	INNTI	2N+1NN	51	587	745	107	638		1784														NO				3.69
120323086024	2010	YES	VIH		NO	NO	YES	2010	MWM	H	37	30	NonAIDS	6.95	4.73	327	481	22	654	Other	Other	2N+1IPb+1II+1IE	18	8	452	426	26		2548							672	1.45	YES	YES				NO				1.92	1.45
120324733913	2010	YES	VIH		YES	NO	NO	2010	Woman	F	39	32	NonAIDS	4.52	4.61	219	262	7	234	Simplification	IPb	2N+1IPb	0	102	220	118	102		2726
120324915469	2010	YES	VIH		YES	NO	NO	2010	MWW	H	42	35	NonAIDS	5.36	5.36	339	339	93	2840	Simplification	INSTI	2N+1II	14	35	821	772	49		2833
120330318928	2011	YES	VIH		NO	NO	NO	2011	MWM	H	65	59	NonAIDS	5.38	5.48	1335	729	17	518	SIDEFF	INNTI	2N+1NN	23	202	428	203	225		2330									NO						1760	1.43	YES		5.48
120337195993	2011	YES	VIH		YES	NO	NO	2011	MWW	H	63	57	NonAIDS	4.64	4.64	269	269	1	40	SIDEFF	IPb	2N+1IPb	45	31	256	180	76		2452							417	1.3		YES				YES	702	1.3	YES	1.3
120337353230	2011	YES	VIH		YES	NO	NO	2011	Woman	F	33	27	NonAIDS	5.3	5.3	248	248	29	875	SIDEFF	IPb	2N+1IPb	69	56	356	231	125		2254	214	3.56	NO				305	1.56		YES	453	1.3	YES	YES				1.3
120338604152	2010	YES	VIH		NO	NO	NO	2010	MWM	H	66	59	NonAIDS	4.3	4.08	705	387	73	2242	Other	INNTI	2N+1NN	19	361	435	55	380		2690	673	2.31	NO	701	1.32	YES	744	1.3	NO	YES				NO				4.43	4.16
120338771999	2012	YES	VIH		YES	NO	NO	2012	MWM	H	36	31	AIDS	4.99	4.98	369	310	23	700	Simplification	IPb	2N+1IPb	41	133	359	185	174	14	2081							389	1.3	NO	YES	910	1.3	YES	YES	530	1.3	YES	1.3	3.57
120339504421	2008	YES	VIH		NO	NO	YES	2010	MWW	H	43	36	NonAIDS	5.93	5.24	666	758	60	1851	Other	INSTI	2N+1II	0	414	459	45	414		2413				895	1.43	YES			NO					NO	1160	1.3	YES	5.24	5.14
120341060877	2010	YES	VIH		NO	NO	NO	2010	MWM	H	39	32	NonAIDS	4.18	5.1	374	306	71	2161		INNTI	2N+1NN	0	548	752	204	548		2516
120341803968	2010	YES	VIH		NO	NO	NO	2010	Woman	F	48	41	NonAIDS	4.34	4.14	423	415	50	1534	Simplification	IPb	2N+1IPb	67	595	732	70	662		2710									NO						640	1.3	YES		4.38
120342739582	2011	YES	VIH		NO	NO	YES	2011	MWW	H	49	43	NonAIDS					4	98	SIDEFF	INSTI	2N+1II	43	1123	1228	62	1166		2355														NO				2.3
120345546961	2012	YES	VIH		NO	NO	NO	2011	MWM	H	49	43	NonAIDS	4.73	4.84	541	632	36	1086	SIDEFF	INNTI	2N+1NN	42	286	455	127	328		2150	609	4.6	NO	649	1.73	NO								NO				4.6
120347591579	2013	YES	VIH		YES	NO	NO	2013	Woman	F	56	52	NonAIDS	4.4	4.4	241	309	1	40	SIDEFF	INSTI	2N+1II	19	8	875	848	27		1540															530	1.3	YES
120349508166	2010	YES	VIH		ND	ND	NO	2010	Woman	F	37	30	NonAIDS					86	2590		IPb	2N+1IPb	74	210	601	317	284		2731
120351999819	2011	YES	VIH		NO	NO	NO	2011	Woman	F	57	55	NonAIDS	4.82	4.55	495	295	72	2180		IPb	2N+1IPb	37	295	616	284	332		991	480	2.73	NO								617	1.3	YES	NO				2.73
120352566004	2010	YES	VIH		NO	NO	NO	2010	MWW	H	34	27	NonAIDS	4.68	4.59	415	499	19	575	Other	INNTI	2N+1NN	19	118	256	119	137		2740									NO						489	1.3	YES		1.72
120352611721	2010	NO	VIH		YES	YES	NO	2010	MWW	H	57	50	NonAIDS	5.23	5.23	5	5	52	1589	Other	IPb	2N+1IPb	45	17	202	140	62		2703
120355428040	2011	YES	VIH&HEP	VHB	NO	NO	NO	2011	MWM	H	35	29	NonAIDS	4.9	3.79	528	369	7	217	SIDEFF	IPb	2N+1IPb	20	490	580	70	510		2353									NO		580	1.3	YES						4.57
120355541408	2010	YES	VIH		NO	NO	NO	2010	MWM	H	40	33	NonAIDS	5	5	648	648	16	494	Other	IPb	2N+1IPb	9	0	290	281	9		2513	802	2.91	NO												827	1.3	YES
120357280910	2013	YES	VIH		NO	NO	NO	2013	Woman	F	35	31	NonAIDS	3.21	3.21	458	458	59	1774		IPb	2N+1IPb	14	9	78	55	23		1745	434	1.66	NO	410	1.3	YES			YES					YES				1.3	1.6
120359717965	2011	YES	VIH&HEP	VHC	NO	NO	NO	2011	MWM	H	48	42	NonAIDS	5.32	5.05	496	423	20	626	Intensification	Other	1IPb+1IE	5	215	340	120	220		2151	514	3.28	NO	627	1.48	YES	643	1.71	NO	NO	630	1.3	YES	NO	710	1.5	YES	1.7	4.99
120361004055	2010	YES	VIH		YES	NO	NO	2010	Trans H vers F	Trans H vers F	30	27	NonAIDS	4.66	4.36	345	267	4	113	Other	INNTI	2N+1NN	21	94	193	78	115		1376							577	1.58	YES	YES	662	1.79	NO		732	1.3	YES		1.3
120366436184	2012	YES	VIH		YES	YES	NO	2012	Trans H vers F	Trans H vers F	38	33	AIDS	6.01	6.01	49	49	1	22	Failure	INNTI	2N+1NN	32	6	2048	2010	38	130	2023	42	5.08	NO	81	3.93	NO			NO					NO				2.82	3
120369252503	2010	YES	VIH		YES	NO	NO	2010	MWM	H	31	24	NonAIDS	4.74	4.74	303	377	86	2596		INNTI	2N+1NN	14	111	271	146	125		2585	330	2.35	NO						NO						467	1.3	YES		1.75
120374355495	2013	YES	VIH		NO	NO	NO	2012	MWM	H	34	30	NonAIDS	5.2	5.2	553	553	4	105	SIDEFF	IPb	2N+1IPb	24	14	339	301	38		1282									YES		1210	1.3	YES						1.41
120379100978	2010	YES	VIH		YES	YES	NO	2010	MWW	H	42	35	AIDS		4.69		207	56	1687	SIDEFF	IPb	2N+1IPb	61	198	713	454	259	15	2739	337	5.13	NO												415	3.45	NO
120379238308	2012	YES	VIH		ND	ND	NO	2012	MWW	H	27	22	NonAIDS		5.21		770	16	462	Simplification	IPb	2N+1IPb	138	313	906	455	451		1940				460	2.19	NO
120384516299	2011	YES	VIH		ND	ND	NO	2011	MWM	H	35	33	NonAIDS	3.56	4.53		433	6	197	Simplification	Other	2N+1IE	48	728	984	208	776		974														NO				4.18
120387731433	2010	YES	VIH		NO	NO	NO	2010	MWM	H	31	24	NonAIDS	3.81	4.49	747	331	53	1585		INSTI		6	991	1053	56	997		2513	372	1.4	YES	460	1.3	YES	574	1.3		YES
120389034450	2012	YES	VIH&HEP	VHC	ND	ND	NO	2011	MWM	H	37	31	NonAIDS		4.89		461	63	1908		INNTI	2N+1NN	182	195	593	216	377		2048	498	3.17	NO						NO		770	1.3	YES	NO	760	1.3	YES	4.89	4.19
120393352747	2010	NO	VIH		YES	YES	NO	2010	MWW	H	55	49	NonAIDS	1.82	1.3	200	215	80	2423		INNTI	2N+1NN	11	187	104	-94	198		2165											424	1.4	YES		366	1.51	YES
120395504177	2011	YES	VIH		NO	NO	NO	2011	Woman	F	39	33	NonAIDS	4.96	4.96	352	395	69	2089	Simplification	IPb	2N+1IPb	25	151	482	306	176		2310	437	2.62	NO	521	1.34	YES								YES				1.6
120399105251	2013	NO	VIH&HEP	VHB	YES	YES	NO	2013	MWW	H	36	36	NonAIDS	5.11	5.11	189		59	1795		INSTI	2N+1II	15	7			22		102				190	1.72	NO
120402386189	2010	YES	VIH		NO	NO	NO	2010	Woman	F	32	25	NonAIDS	4.45	4.27	539	478	2	88	Other	IPb	2N+1IPb	25	77	783	681	102		2668									NO						386	3.79	NO		1.72
120403890491	2011	YES	VIH&HEP	VHB	YES	YES	NO	2011	Woman	F	38	36	NonAIDS	6.16	6.16	58	58	18	542	Simplification	IPb	2N+1IPb	27	4	374	343	31		717	131	3.4	NO						NO					YES	325	1.3	YES	1.3	1.65
120411643624	2012	YES	VIH		YES	YES	NO	2012	MWW	H	46	44	NonAIDS	2.29		193		64	1938		IPb	2N+1IPb	49	0	191	142	49		485	203	1.38	YES						YES										1.3
120412120998	2010	YES	VIH		YES	NO	NO	2010	MWM	H	54	47	NonAIDS	6.11	5.79	223	76	10	298	Failure	IPb	2N+1IPb	25	78	1613	1510	103		2602							832	2.4		NO	968	2.14	NO		989	2.01	NO
120413601101	2011	YES	VIH		YES	YES	NO	2011	Woman	F	45	39	NonAIDS	5.25	5.43	8	14	78	2373		IPb	2N+1IPb	0	21	470	449	21		2346	274	3.09	NO	212	2.78	NO	221	2.11	NO	NO				YES	555	1.6	YES	1.53	2.11
120414693713	2011	YES	VIH&HEP	VHC	NO	NO	NO	2011	MWM	H	35	29	NonAIDS		4.87	529	367	22	665	Simplification	IPb	2N+1IPb	117	50	355	188	167		2202	729	2.6	NO	769	1.92	NO	683	1.3	NO	YES				YES	830	1.3	YES	1.3	2.6
120415779233	2011	YES	VIH		YES	NO	NO	2010	MWW	H	43	36	AIDS		5.34	340	11	17	509	Other	IPb	2N+1IPb	167	287			454		2332														NO				5.85
120422370553	2011	NO	VIH		YES	NO	NO	2011	MWW	H	30	30	NonAIDS	5.41	3.34	304	532	83	2505		IPb	2N+1IPb	1	35			36		317
120423676252	2012	YES	VIH		NO	NO	NO	2012	Woman	F	40	35	NonAIDS	3.06	3.24	423	464	63	1917		INNTI	2N+1NN	6	112	211	93	118		1975	634	1.71	NO	490	1.3	YES	501	1.92		NO	540	1.3	YES
120424053371	2010	YES	VIH		ND	ND	NO	2010	MWW	H	54	47	NonAIDS		5.68		194	92	2776		IPb	2N+1IPb	94	21	395	280	115		2728	302	3.23	NO	310	2.26	NO	272	1.7	NO	NO	369	1.3	YES						2.95
120426449001	2011	YES	VIH		NO	NO	YES	2011	MWW	H	37	31	NonAIDS	6.9	6.9	388	375	1	10	Intensification	IPb	2N+1IPb	15	25	429	389	40		1896	581	4.51	NO						NO		812	1.38	YES	NO				1.78	2.46
120426627755	2010	YES	VIH		NO	NO	NO	2010	Trans H vers F	Trans H vers F	38	31	NonAIDS	4.02	4.35	533	680	54	1644		INNTI	2N+1NN	42	1141	1312	129	1183		2772	1020	2.15	NO						NO		1140	1.3	YES	NO	1170	1.3	YES	4.34	4.01
120427604318	2010	YES	VIH		YES	NO	NO	2010	MWM	H	43	36	NonAIDS	4.54	4.63	333	345	18	535	SIDEFF	INNTI	2N+1NN	8	73	274	193	81		2698	459	2.57	NO											NO	573	1.52	YES	2.71
120428371608	2013	YES	VIH		YES	NO	NO	2012	Woman	F	36	31	NonAIDS	5.53	5.53	271	271	2	63	Failure	IPb	2N+1IPb	47	0	288	241	47		1766
120432242990	2012	YES	VIH		NO	NO	NO	2012	Woman	F	34	32	NonAIDS	4.26	4.68	493	366	59	1770		IPb	2N+1IPb	62	208	395	125	270		789	328	2.61	NO						NO										4.53
120432395577	2011	YES	VIH		NO	NO	YES	2011	MWM	H	44	42	NonAIDS		4.7	553	330	65	1970		IPb	2N+1IPb	30	386			416		875														NO				4.7
120434597254	2011	YES	VIH		NO	NO	NO	2010	Woman	F	36	29	NonAIDS			831		-1	-35		INNTI	2N+1NN	245	2464	2731	22	2709		2317	740	1.3	YES
120435283840	2010	YES	VIH		YES	YES	NO	2010	MWW	H	48	41	AIDS	5.4	5.3	41	36	11	334	Other	INNTI	2N+2NN	35	1	176	140	36	0	2722	168	2.88	NO						YES					YES				1.3	1.3
120435709536	2012	YES	VIH		NO	NO	NO	2012	MWM	H	25	20	NonAIDS	5.21	5.3	565	420	10	278		INSTI		75	1673	2105	357	1748		1855											530	1.3	YES
120436818957	2010	YES	VIH		NO	NO	NO	2010	MWM	H	34	27	NonAIDS		5.34	551	378	84	2553		Other	1IPb+1II	119	236	690	335	355		2765	618	2.49	NO	819	2.03	NO								NO	762	1.3	YES	2.42
120438305080	2011	YES	VIH		ND	ND	NO	2011	Woman	F	39	33	NonAIDS	3.92	4.33		266	7	224	Other	INNTI	2N+1NN	42	200	327	85	242		2422	371	2.4	NO	376	1.3	YES			NO										4.21
120439612985	2011	YES	VIH		NO	NO	NO	2011	MWM	H	53	47	NonAIDS	4.13	4.35	460	348	43	1303	Simplification	IPb	2N+1IPb	65	49	386	272	114		2324									NO										2.43
120440528512	2010	YES	VIH		NO	NO	NO	2010	MWW	H	43	41	NonAIDS	5.88	5.59	383	365	87	2636		INNTI	2N+1NN	40	133	545	372	173		749											480	1.3	YES
120440609455	2010	YES	VIH		YES	NO	NO	2010	MWW	H	24	22	NonAIDS	4.53	4.32	338	338	0	3	SIDEFF	INNTI	2N+1NN	14	24	282	244	38		736	416	2.51	NO								445	1.3	YES
120440639675	2012	YES	VIH		NO	NO	NO	2012	MWM	H	49	44	NonAIDS	5.74	5.74	474	474	42	1274	Simplification	IPb	2N+1IPb	21	7	210	182	28		2101							694	1.3		YES
120441677272	2011	YES	VIH		NO	NO	NO	2011	MWM	H	29	23	NonAIDS	5.44	5.39	491	482	7	209	Simplification	IPb	2N+1IPb	20	429			449		2257				729	2.36	NO
120443844020	2012	YES	VIH		YES	NO	NO	2012	MWM	H	33	28	NonAIDS	4.57	4.65	208	230	24	751	Other	INNTI	2N+1NN	39	84	272	149	123		1871	262	2.65	NO
120446102321	2010	YES	VIH		NO	NO	NO	2010	Woman	F	62	55	NonAIDS	5.85	3.97	586	412	21	671	Other	INNTI	2N+1NN	70	13	551	468	83		2393
120446254909	2010	YES	VIH		NO	NO	NO	2010	MWM	H	33	27	NonAIDS	4.31	4.65	675	400	34	1021		INSTI	2N+1II	105	1701	2004	198	1806		2290				840	1.78	NO									790	1.3	YES
120448513210	2010	YES	VIH&HEP	VHC	NO	NO	NO	2010	MWW	H	36	29	NonAIDS			357	357	91	2756		INNTI	2N+1NN	16	63	323	244	79		2737									NO						203	1.3	YES		1.65
120453786194	2012	YES	VIH		NO	NO	NO	2012	MWM	H	36	31	NonAIDS	6.8	6.8	679	679	28	870	Other	IPb	2N+1IPb	1	32	341	308	33		2034	640	3.27	NO	953	1.94	NO									1010	1.41	YES
120454342067	2010	YES	VIH		YES	YES	NO	2010	Woman	F	46	39	AIDS	5.95	5.48	122	163	26	784	Simplification	IPb	2N+1IPb	0	94	316	222	94	0	2744	205	3.31	NO						NO										2.42
120459209621	2012	YES	VIH&HEP	VHB	NO	NO	NO	2012	Woman	F	58	53	NonAIDS	4.25	1.9	498	900	6	182	Simplification	Other	1N+1IPb	20	843	898	35	863		2113	610	1.3	YES				830	1.3	NO	YES	780	1.3	YES	NO	780	1.3	YES	2.92	2.93
120461734593	2012	YES	VIH&HEP	VHB	NO	NO	NO	2011	MWW	H	52	46	NonAIDS	4.81	3.82	848	786	60	1810		INNTI	2N+1NN	22	364	415	29	386		2079	760	1.3	YES						NO					NO				3.82	4.48
120465491891	2010	YES	VIH		YES	YES	NO	2010	MWW	H	67	60	NonAIDS	5.03	4.93	15	7	38	1145	Other	IPb	2N+1IPb	26	41	201	134	67		2512	44	2.39	NO						NO		48	1.6	YES						1.61
120467236042	2012	YES	VIH		YES	YES	NO	2012	Woman	F	34	29	NonAIDS	5.01	5.29	86	81	38	1175	Simplification	IPb	2N+1IPb	31	85	731	615	116		1793				110	2.38	NO			NO					NO				1.87	2.84
120469799221	2012	YES	VIH		NO	NO	NO	2011	MWM	H	55	50	NonAIDS	5.74	5.58	406	390	70	2118		INSTI	2N+1II	52	63	154	39	115		1793				514	1.72	NO	638	1.34	NO	YES				NO				1.7	1.71
120476238489	2011	YES	VIH		YES	NO	NO	2011	Woman	F	39	33	NonAIDS	4.69	4.69	300	300	26	792	Simplification	IPb	2N+1IPb	28	0	254	226	28		2345
120484432399	2010	YES	VIH		NO	NO	NO	2010	Woman	F	50	43	NonAIDS	4.51	4.07	355	286	4	124	Other	IPb	2N+1IPb	50	0	148	98	50		2795	438	2.41	NO	488	1.3	YES								NO	371	4.01	NO	3.94
120484478176	2011	YES	VIH		YES	YES	NO	2010	MWW	H	58	51	AIDS					49	1511	Simplification	IPb	2N+1IPb	5	1	61	55	6	4	2550									YES		84	1.3	YES	YES	118	1.3	YES	1.3	1.3
120486822009	2011	YES	VIH		ND	ND	NO	2010	MWM	H	51	44	NonAIDS		4.75		491	1	40	Other	INSTI	2N+1II	400	918	2418	1100	1318		2353														NO				4.95
120490910828	2010	YES	VIH		ND	ND	NO	2010	MWM	H	35	31	NonAIDS					4	101	Simplification	INNTI	2N+1NN	21	66	349	262	87		1392							858	1.64		NO	357	1.3	YES
120493679285	2011	YES	VIH		YES	NO	NO	2011	MWM	H	37	31	NonAIDS	3.7	5.68	234	306	3	84	Simplification	INNTI	2N+1NN	17	126	365	222	143		2415											748	1.3	YES	YES				1.3
120499776185	2012	YES	VIH		YES	NO	NO	2012	Trans H vers F	Trans H vers F	38	33	NonAIDS	5.41	5.41	266	266	11	316	Simplification	IPb	2N+1IPb	6	5	196	185	11		1986	555	3.07	NO				528	1.6		YES
120500423610	2012	YES	VIH		YES	NO	NO	2012	MWM	H	31	27	NonAIDS	4.85	4.93	214	233	16	491	Simplification	IPb	2N+1IPb	40	34	163	89	74		1525	258	2.73	NO	295	1.3	YES	308	1.3		YES
120500560939	2012	YES	VIH		YES	YES	NO	2012	MWM	H	50	45	AIDS	6.06	6.06	16	16	27	831	Simplification	Other	1N+1IPb+1II	5	7	115	103	12	0	1860	45	2.39	NO				202	1.97	NO	NO									1.97
120502208889	2011	YES	VIH		YES	NO	NO	2011	MWM	H	55	49	NonAIDS	5.12	5.08	331	359	78	2348		INNTI	2N+1NN	39	52	270	179	91		2374	406	2.63	NO	361	1.74	NO	358	1.3	NO	YES				YES	696	1.3	YES	1.3	1.74
120507809162	2010	NO	VIH&HEP		YES	NO	NO	2010	MWW	H	32	31	NonAIDS	2.17	2.17	247	247	83	2510		INNTI	2N+1NN	75	78			153		78
120511684597	2011	YES	VIH&HEP	VHB	YES	YES	NO	2011	MWW	H	69	63	NonAIDS	4.49	4.49	178	435	15	463	Simplification	IPb	2N+1IPb	8	23	151	120	31		2223														YES				1.3
120514812648	2012	YES	VIH		NO	NO	NO	2012	MWM	H	53	48	NonAIDS	5.05	4.39	672	521	64	1936		INNTI	2N+1NN	40	59	244	145	99		1808	633	2.29	NO						NO					YES				1.5	1.61
120515773952	2011	YES	VIH		NO	NO	YES	2011	MWM	H	55	49	NonAIDS	2.95	4.73	713	450	28	857	Simplification	INSTI	2N+1II	7	1144	1316	165	1151		2218				590	1.43	YES	490	1.3		YES					620	1.6	YES
120517707467	2011	YES	VIH		YES	NO	NO	2011	Woman	F	38	32	NonAIDS	3.87	4.76	210	205	37	1127	Simplification	IPb	2N+1IPb	5	89	185	91	94		2048	206	2.19	NO	234	1.3	YES	222	1.3	YES	YES					290	1.3	YES		1.3
120519085109	2013	YES	VIH		YES	YES	NO	2013	Woman	F	33	29	NonAIDS	5.2	5.2	41	41	20	607	Simplification	IPb	2N+1IPb	4	11	369	354	15		1785	75	3.2	NO								160	1.3	YES	YES				1.3
120519741237	2010	YES	VIH&HEP	VHC	YES	NO	NO	2010	MWW	H	71	64	AIDS		4.15	364	395	51	1555	SIDEFF	INNTI	2N+1NN	14	193	335	128	207	0	2736									NO										4.15
120523006618	2012	YES	VIH		YES	YES	NO	2012	Woman	F	33	28	NonAIDS	5.26	5.2	52	52	3	88	Other	INNTI	2N+1NN	7	9	135	119	16		1934	219	1.9	NO												500	1.3	YES
120525763929	2010	YES	VIH		ND	ND	NO	2010	MWW	H	39	32	NonAIDS		5.3		254	64	1931		INNTI	2N+1NN	203	686	1057	168	889		2506							588	1.3		YES	650	1.3	YES
120529088318	2011	YES	VIH&HEP	VHB	NO	NO	NO	2011	Woman	F	52	46	NonAIDS	3.14	1.3	601	716	45	1362	SIDEFF	IPb	2N+1IPb	27	221	152	-96	248		2311														YES	980	1.3	YES	1.3
120533214748	2010	YES	VIH		YES	YES	NO	2010	Woman	F	63	56	NonAIDS	5.4	5.4	58	58	76	2295	SIDEFF	IPb	2N+1IPb	0	21	187	166	21		2567							203	1.3	YES	YES									1.3
120533443689	2011	YES	VIH		YES	YES	NO	2011	MWM	H	41	35	NonAIDS	5.2	5.32	127	125	53	1614	Simplification	IPb	2N+1IPb	32	48	256	176	80		2283	194	2.94	NO	204	1.99	NO	259	1.3	NO	YES									1.99
120534801662	2012	YES	VIH		NO	NO	NO	2012	MWM	H	35	31	NonAIDS	4.57	4.78	711	620	24	720		INSTI	2N+1II	35	1392			1427		1707	750	1.48	YES
120535152674	2010	YES	VIH		NO	NO	NO	2010	MWM	H	35	28	NonAIDS	4.95	4.4	419	470	55	1655		INNTI	2N+1NN	67	1113	1270	90	1180		2646	550	1.62	NO	490	1.3	YES								NO				4.54
120536510646	2013	YES	VIH&HEP	VHB	ND	ND	NO	2012	Woman	F	49	44	NonAIDS		4.4		281	58	1768	SIDEFF	INNTI	2N+1NN	231	9	482	242	240		1777
120544332385	2011	NO	VIH		NO	NO	NO	2011	Woman	F	31	31	NonAIDS	4.62	4.62	827	827	80	2429		IPb	2N+1IPb	6	0	51	45	6		57
120548458338	2011	YES	VIH		YES	NO	NO	2011	MWM	H	60	54	NonAIDS	5.23	5.62	308	394	11	322	Simplification	IPb	2N+1IPb	20	238	365	107	258		2278	412	3.06	NO											YES				1.3
120549443543	2011	YES	VIH		YES	NO	NO	2011	Woman	F	48	42	NonAIDS	5.87	5.87	329	304	16	484	Simplification	IPb	2N+1IPb	85	55	471	331	140		2183	530	3.52	NO	521	2.32	NO			NO						790	1.3	YES		3.52
120551449001	2011	YES	VIH&HEP	VHB	YES	NO	NO	2011	Woman	F	35	29	NonAIDS	5.05	5.26	308	308	3	86	SIDEFF	IPb	2N+1IPb	14	0	498	484	14		2350	445	3.24	NO	454	2.38	NO
120552852809	2012	YES	VIH		ND	ND	NO	2012	Woman	F	38	33	NonAIDS		4.8			1	22	SIDEFF	INNTI	2N+1NN	129	8	287	150	137		1709									NO		400	1.53	YES						4.4
120561199367	2011	YES	VIH		NO	NO	NO	2011	Woman	F	46	40	NonAIDS	3.8	3.6	808	720	9	266	Other	INNTI	2N+1NN	18	765	813	30	783		2424	860	1.3	YES												1240	1.3	YES
120562932312	2011	YES	VIH		ND	ND	NO	2011	MWW	H	39	33	NonAIDS		4.4		312	32	964		INSTI	2N+1II	106	1380	205	-1281	1486		2297									NO										3.93
120564617336	2013	YES	VIH&HEP	VHC	NO	NO	NO	2012	Trans H vers F	Trans H vers F	49	46	NonAIDS	4.3	4.16	611	500	44	1314		INSTI	2N+1II	49	477	633	107	526		848
120564854920	2012	YES	VIH		YES	NO	NO	2012	Woman	F	31	26	NonAIDS	5.1	5.1	331	331	48	1472	Simplification	IPb	2N+1IPb	67	21	347	259	88		1927	363	3.13	NO	316	2.01	NO			NO						600	1.3	YES		2.01
120566677272	2012	NO	VIH		NO	NO	NO	2012	MWM	H	41	36	NonAIDS	5.22	4.4	778	750	11	319		INSTI		47	1766	1839	26	1813		2079	749	1.7	NO	896	1.7	NO					1170	1.7	NO
120567164004	2010	YES	VIH		NO	NO	YES	2010	MWM	H	49	42	NonAIDS	6.39	6.39	204	204	7	210	Failure	IPb	2N+1IPb	26	21	853	806	47		2542	328	4.16	NO	388	3.23	NO	367	2.42	NO	NO				NO	377	1.7	NO	2.2	2.85
120568233669	2011	YES	VIH		NO	NO	YES	2011	MWM	H	28	25	NonAIDS	4.6	4.43	172	180	83	2504		IPb	2N+1IPb	25	22	161	114	47		1385											280	1.3	YES
120569973171	2012	YES	VIH		NO	NO	NO	2012	MWW	H	37	32	NonAIDS	4.8	4.59	572	620	27	819	Other	INSTI	2N+1II	50	957	1091	84	1007		1979	600	1.4	YES	820	1.3	YES
120570079982	2011	YES	VIH		NO	NO	NO	2011	MWM	H	68	62	NonAIDS	4.43	4.78	677	677	0	1	SIDEFF	INSTI	2N+1II	13	21	83	49	34		2156							580	1.3		YES	870	1.3	YES
120571708321	2010	YES	VIH		YES	YES	NO	2010	Woman	F	63	56	NonAIDS	5.05	5.05	140	140	23	708	Simplification	IPb	2N+1IPb	17	31	189	141	48		2607									YES					YES				1.3	1.3
120572514832	2010	YES	VIH		NO	NO	YES	2010	MWM	H	35	30	NonAIDS	5.77	4.4	720	610	6	164	SIDEFF	INNTI	2N+1NN	27	1187	1333	119	1214		1877
120573543727	2010	NO	VIH		NO	NO	YES	2010	MWM	H	33	33	NonAIDS	6.03	5.06	352	311	91	2758		INNTI	2N+1NN	8	27			35		132	549	2.89	NO	360	1.76	NO
120576732814	2011	YES	VIH		ND	ND	NO	2011	MWM	H	30	25	NonAIDS		5.58		529	74	2251		INNTI	2N+1NN	103	162	455	190	265		1785							884	1.6	NO	YES				NO	990	1.97	NO	2.73	5.9
120578975856	2012	YES	VIH		NO	NO	NO	2012	Woman	F	28	23	NonAIDS	4.28	4.28	887		12	364	Other	IPb	2N+1IPb	28	0	154	126	28		1841	887	2.18	NO	756	2.94	NO			YES		1170	1.3	YES		1050	1.3	YES		0
120583255589	2010	YES	VIH		NO	NO	YES	2010	MWM	H	50	43	NonAIDS	7	6.2	296	296	24	708	Other	Other	2N+1IPb+1II+1IE	5	0	85	80	5		2569	753	2.36	NO	642	1.3	YES			YES						721	1.8	NO		1.3
120586828887	2011	YES	VIH		YES	YES	NO	2010	MWW	H	57	52	AIDS	5.13	5.49	133	7	72	2182		IPb	2N+1IPb	493	27	613	93	520	594	1327	176	2.81	NO	67	1.3	YES	89	4.62		NO
120591330945	2010	YES	VIH		NO	NO	NO	2010	MWW	H	47	40	NonAIDS	3.68	3.68	433	433	72	2199	SIDEFF	INSTI	2N+1II	10	63	313	240	73		2633									YES					YES				1.3	1.3
120592739284	2012	YES	VIH&HEP	VHB	ND	ND	NO	2010	MWW	H	35	28	NonAIDS		1.3		304	10	317	Other	INNTI	2N+1NN	862	167	862	-167	1029		1826											1300	1.3	YES		750	1.3	YES
120593068957	2010	YES	VIH&HEP	VHB	YES	YES	NO	2010	Woman	F	32	25	NonAIDS	3.94	2.67	198	216	58	1749	Simplification	IPb	2N+1IPb	0	77	161	84	77		2585				226	1.3	YES									283	1.68	NO
120594092071	2012	YES	VIH		NO	NO	NO	2012	MWM	H	37	32	NonAIDS	4.73	4.73	445	445	2	70	SIDEFF	IPb	2N+1IPb	3	21	137	113	24		2002	780	2.79	NO
120597027004	2012	YES	VIH		ND	ND	NO	2012	MWM	H	32	27	NonAIDS					51	1550		INNTI	2N+1NN	21	359	504	124	380		1549	590	2	NO								770	1.3	YES	NO				3.7
120597082019	2011	YES	VIH		ND	ND	NO	2011	Woman	F	42	36	NonAIDS		6.09		137	62	1863	Failure	IPb	2N+1IPb	183	73	841	585	256		2230	164	3.67	NO	187	2.51	NO	228	1.89		NO
120597240925	2010	YES	VIH		NO	NO	NO	2010	Woman	F	32	25	NonAIDS	4.27	4.88	553	418	19	592	Other	IPb	2N+1IPb	59	368	609	182	427		2550							649	1.3	NO	YES	689	1.3	YES						4.45
120597326159	2010	YES	VIH		NO	NO	NO	2010	MWW	H	43	41	NonAIDS	4.7	5.23	595	439	71	2133		IPb	2N+1IPb	198	455			653		581	569	3.82	NO						NO										4.72
120602077663	2010	YES	VIH		YES	YES	NO	2010	MWW	H	53	46	AIDS	3.52		254		49	1500	Simplification	IPb	2N+1IPb	6	17	534	511	23	0	2694	254	3.52	NO						NO										1.79
120604641139	2012	YES	VIH		NO	NO	NO	2012	MWM	H	41	36	NonAIDS	4.66	5.39	363	214	12	357	Simplification	IPb	2N+1IPb	22	318	634	294	340		2093
120607798159	2012	YES	VIH		NO	NO	NO	2011	MWM	H	22	20	NonAIDS	5.47	5.57	360	588	70	2119		IPb	2N+1IPb	36	50	252	166	86		534	687	2.63	NO	608	2.04	NO	524	1.67	NO	NO									2.19
120608572662	2011	YES	VIH		NO	NO	NO	2011	MWM	H	49	43	NonAIDS	5.79	4.64	684	350	53	1614		INNTI	2N+1NN	9	784	920	127	793		2183	490	2.12	NO
120610267281	2011	YES	VIH		YES	YES	NO	2011	MWW	H	32	26	NonAIDS	5.02	5.19	56	34	72	2183		IPb	2N+1IPb	41	49	175	85	90		2058				78	1.3	YES	90	1.3	YES	YES									1.3
120613811672	2010	NO	VIH		ND	ND	NO	2010	Woman	F	30	23	NonAIDS		2.9		693	1	28	SIDEFF	IPb	2N+1IPb	8	1400	1436	28	1408		2345	686	1.3	YES				694	1.3		YES
120614162624	2010	YES	VIH		YES	YES	NO	2010	MWM	H	58	51	AIDS	3.52		207		19	577	SIDEFF	IPb	2N+1IPb	1	3	476	472	4	32	2722	207	3.52	NO	190	2.26	NO	156	2	NO	NO					182	1.95	NO		2
120616893947	2011	YES	VIH		YES	NO	NO	2011	Woman	F	39	33	NonAIDS	4.43	4.61	270	268	50	1533	Other	INNTI	2N+1NN	112	45	242	85	157		2187				409	1.3	YES								YES				1.3
120619300306	2012	YES	VIH		YES	NO	NO	2012	MWW	H	51	46	NonAIDS	5.26	5.26	215	215	60	1842	Failure	INNTI	2N+1NN	15	22	343	306	37		2037	309	3.15	NO				353	2.12		NO
120621135950	2012	YES	VIH		NO	NO	NO	2012	Woman	F	25	24	NonAIDS	4.92	5.15	440	495	0	28	Simplification	INNTI	2N+1NN	35	104	287	148	139		454									YES					YES				1.3	1.53
120626812219	2011	YES	VIH		NO	NO	NO	2011	Woman	F	38	32	NonAIDS	3.22	4.26	441	545	68	2043		IPb	2N+1IPb	41	453	614	120	494		2395	516	1.65	NO				646	1.3		YES				NO				4.33
120627677560	2012	YES	VIH		NO	NO	NO	2012	MWM	H	31	26	NonAIDS	4.89	4.98	703	670	13	404	Simplification	IPb	2N+1IPb	29	57	238	152	86		1847	667	2.56	NO								910	1.3	YES		1170	1.3	YES
120631191432	2012	NO	VIH		YES	YES	NO	2012	MWW	H	51	51	AIDS					0	12	Simplification	Other	2N+1IPb+1IF+1II	4	9			13	4	81
120631368518	2011	YES	VIH		NO	NO	NO	2011	Woman	F	39	33	NonAIDS	5.27	4.85	594	349	69	2077		IPb	2N+1IPb	20	244	479	215	264		2225	548	3.15	NO											NO	620	1.3	YES	2.64
120633831203	2012	YES	VIH		NO	NO	NO	2012	MWM	H	38	33	NonAIDS	2.56		527		1	31	Other	IPb	2N+1IPb	0	0	1925	1925	0		1752				899	4.66	NO
120640896022	2012	YES	VIH&HEP	VHB	YES	YES	NO	2012	Woman	F	42	37	AIDS	4.23	4.23	5	5	71	2155		IPb	2N+1IPb	37	0	228	191	37	0	2150	40	1.79	NO	58	1.49	YES	45	1.3		YES	37	1.3	YES	YES	20	1.3	YES	1.3
120641216457	2010	YES	VIH		YES	YES	NO	2010	MWW	H	50	43	NonAIDS	5	5	94	94	15	441	SIDEFF	IPb	2N+1IPb	5	7	172	160	12		2841									YES										1.3
120641643703	2010	YES	VIH&HEP	VHC	YES	YES	NO	2010	MWW	H	58	51	AIDS					1	21	Simplification	IPb	2N+1IPb	55	6	413	352	61	70	2448				193	2.49	NO	254	2.14		NO	247	1.7	NO		194	1.43	YES
120644172788	2010	YES	VIH		ND	ND	NO	2010	MWM	H	40	33	NonAIDS					14	421	Simplification	Other	1N+1IPb+1II+1IE	98	1140	1321	83	1238		2607				706	1.3	YES	684	1.3		YES				NO				4.62
120645076930	2011	NO	VIH		YES	NO	NO	2011	MWW	H	48	47	NonAIDS	5.86	6.18	275	248	72	2180		IPb	2N+1IPb	12	30			42		84
120651561916	2010	YES	VIH		YES	YES	NO	2010	MWW	H	31	24	AIDS	5.78	5.78	6	6	36	1096	Other	INNTI	2N+1NN	30	21	150	99	51	31	2652	44	1.76	NO	50	1.3	YES	80	1.3	YES	YES									1.3
120656672060	2011	YES	VIH		NO	NO	NO	2011	MWW	H	35	29	NonAIDS		3.65	536	434	68	2068		INNTI	2N+1NN	91	128	343	124	219		1876	562	1.96	NO						NO		340	1.3	YES						3.65
120657650173	2010	NO	VIH		YES	YES	NO	2010	MWW	H	36	36	NonAIDS	5.37	5.37	32	32	91	2754		IPb	2N+1IPb	6	11			17		14	148	5	NO
120671215236	2011	YES	VIH		ND	ND	NO	2010	Woman	F	64	58	NonAIDS		1.3		363	80	2436		IPb	2N+1IPb	122	91	164	-49	213		1974														NO				2
120673107326	2011	YES	VIH		NO	NO	NO	2010	Woman	F	52	45	NonAIDS	5.04	4.51	817	1035	4	122	SIDEFF	IPb	2N+1IPb	92	129	292	71	221		2487							1098	1.3		YES	1570	1.3	YES
120673656642	2011	YES	VIH&HEP	VHB	YES	YES	NO	2011	Woman	F	35	29	AIDS	6.35	6.35	1	1	1	45	SIDEFF	Other	2N+1NN+1IF	63	12	407	332	75	75	2182														YES				1.43
120674083888	2011	NO	VIH		YES	YES	NO	2011	MWW	H	53	52	AIDS	5.15	5.15	45	45	74	2237		IPb	2N+1IPb	7	1			8	0	173	107	3.82	NO						NO										1.9
120686269104	2011	YES	VIH		YES	NO	NO	2011	MWM	H	45	41	NonAIDS	6.19	6.19	231	231	82	2482		INNTI	2N+1NN	22	0			22		1414	459	3.65	NO
120686467469	2010	NO	VIH		YES	YES	NO	2010	MWW	H	35	34	AIDS	6.1	6.1	41	41	92	2777		IPb	2N+1IPb	0	14			14	0	280
120688069641	2012	YES	VIH		NO	NO	NO	2012	MWW	H	51	46	NonAIDS	4.75	5.02	554	533	20	601	Simplification	IPb	2N+1IPb	36	204	582	342	240		1974	755	3.23	NO	880	1.95	NO	702	1.73		NO
120697626650	2012	YES	VIH		ND	ND	NO	2011	Woman	F	44	39	NonAIDS		4.61		377	40	1196	Simplification	IPb	2N+1IPb	130	122	388	136	252		1773	509	3.07	NO												738	1.3	YES
120699640214	2010	NO	VIH		NO	NO	NO	2010	MWM	H	32	27	NonAIDS	4.36	4.35	580	350	4	126	Simplification	IPb	2N+1IPb	41	1287	1455	127	1328		1847															600	1.3	YES
120702247262	2012	YES	VIH		NO	NO	NO	2012	Woman	F	36	31	NonAIDS	3.95	3.83	358	196	62	1862	Simplification	IPb	2N+1IPb	11	126	250	113	137		1988	324	2.25	NO						NO										2.25
120702415108	2010	YES	VIH		YES	YES	NO	2010	MWW	H	40	33	NonAIDS	2.8		161	161	88	2696	Simplification	IPb	2N+1IPb	27	11	2762	2724	38		2855				245	2.15	NO	302	1.66		NO	288	1.75	NO
120702565491	2010	YES	VIH		YES	YES	NO	2010	MWW	H	62	55	AIDS	5.78	5.78	29	29	20	614	Failure	INNTI	2N+1NN	10	1	371	360	11	0	2778				225	2.77	NO					257	1.3	YES	YES	381	2.11	NO	1.3
120702903390	2012	YES	VIH		NO	NO	NO	2012	MWM	H	35	34	NonAIDS	3.72	3.5	487	500	58	1740		INNTI	2N+1NN	21	143			164		416	519	2	NO
120705868006	2010	YES	VIH		NO	NO	NO	2010	Woman	F	61	54	NonAIDS	4.36	4.91	706	523	2	48	Simplification	INNTI	2N+1NN	154	414	655	87	568		2506				594	1.3	YES	632	1.3		YES
120708431423	2011	YES	VIH		YES	NO	NO	2011	MWW	H	60	54	NonAIDS	5.41	5.41	220	220	11	345	SIDEFF	IPb	2N+1IPb	51	0	183	132	51		2269	299	2.98	NO	313	2.25	NO			YES										1.3
120709682643	2012	YES	VIH		NO	NO	YES	2012	MWW	H	42	37	NonAIDS	6.71	5.16	654	359	15	443	Other	Other	1IPb+1IE	48	35	257	174	83		2079	453	3.61	NO				484	1.3		YES					631	1.6	YES
120711040675	2012	YES	VIH		NO	NO	NO	2012	Woman	F	45	40	NonAIDS	3.69	4.42	451	430	30	913	Simplification	IPb	2N+1IPb	32	1035	1271	204	1067		1948	500	3.31	NO						NO										3.67
120715764880	2011	YES	VIH&HEP	VHC	YES	NO	NO	2011	Woman	F	32	26	NonAIDS	5.09	4.95	228	257	35	1064	Simplification	IPb	2N+1IPb	15	91	1503	1397	106		2262											157	4.06	NO	NO				2.97
120721477687	2010	YES	VIH		NO	NO	NO	2010	Trans H vers F	Trans H vers F	36	29	NonAIDS	4.35	4.13	432	306	76	2288		INNTI	2N+1NN	35	441	728	252	476		2688	308	2.1	NO
120725567043	2012	YES	VIH		YES	YES	NO	2012	MWM	H	43	38	AIDS	5.86	6.24	49	193	12	376	Simplification	IPb	2N+1IPb	8	23	282	251	31	0	2100	328	2.81	NO	215	1.74	NO	248	1.3		YES	350	1.3	YES	YES	380	1.3	YES	1.3
120728202283	2012	YES	VIH		NO	NO	NO	2012	MWW	H	49	44	NonAIDS	1.3	1.3	836	609	1	42	Simplification	INNTI	2N+1NN	55	126	58	-123	181		1911									YES						850	1.3	YES		1.3
120733161568	2011	YES	VIH		YES	NO	NO	2011	Woman	F	70	64	NonAIDS	2.41		270		2	49	SIDEFF	IPb	2N+1IPb	11	0	102	91	11		2086	270	2.41	NO	272	1.3	YES	284	1.3	YES	YES									1.3
120735363185	2013	YES	VIH		NO	NO	NO	2013	Woman	F	80	76	NonAIDS	5.39	5.3	690	562	21	623	Simplification	IPb	2N+1IPb	5	261	673	407	266		1633					2.1	NO			NO					NO				2.1	5.3
120736457467	2010	YES	VIH		NO	NO	NO	2010	MWM	H	37	35	NonAIDS	4.64	4.39	378	486	10	294	SIDEFF	INNTI	2N+1NN	59	371	584	154	430		784
120737327218	2010	YES	VIH		NO	NO	NO	2010	MWM	H	51	44	NonAIDS	5.5	4.91	600	810	52	1581	Other	IPb	2N+1IPb	19	557	799	223	576		2719	681	3.18	NO								894	1.3	YES	NO				4.71
120737621486	2011	YES	VIH		NO	NO	NO	2011	Woman	F	54	48	NonAIDS	2	1.6	562	1050	8	215	SIDEFF	INSTI	2N+1II	42	1344	54	-1332	1386		2339	880	1.6	YES						NO										2
120740001857	2012	YES	VIH		YES	YES	NO	2012	MWW	H	74	69	AIDS	5.9	6.93	39	33	26	783	Other	IPb	2N+1IPb	0	41	301	260	41	0	1856	77	3.03	NO	221	2.35	NO								YES				1.3
120740514099	2011	YES	VIH		YES	NO	NO	2011	MWW	H	30	24	NonAIDS	4.53	4.1	310	410	34	1016	Other	INSTI	2N+1II	74	1149	1251	28	1223		2388	460	1.3	YES								640	1.3	YES
120741477430	2010	YES	VIH		NO	NO	NO	2010	MWW	H	46	40	NonAIDS	4.44	4.76	517	557	22	658	Simplification	INNTI	2N+1NN	57	84	231	90	141		2190	608	2.1	NO	632	1.3	YES			NO					YES	635	1.3	YES	1.3	2.1
120748267770	2010	YES	VIH&HEP	VHC	YES	NO	NO	2010	Woman	F	23	18	NonAIDS	6.63	6.5	241	209	13	408	Simplification	IPb	2N+1IPb	0	58	456	398	58		2157	307	3.97	NO				393	1.63	NO	NO					426	1.3	YES		2.14
120751057923	2010	YES	VIH		NO	NO	NO	2010	MWM	H	45	38	NonAIDS	5.23	4.85	354	284	43	1295	SIDEFF	IPb	2N+1IPb	42	0	331	289	42		2857	389	2.82	NO	443	2.1	NO	475	1.32		YES	465	1.3	YES
120751415431	2011	YES	VIH		ND	ND	NO	2011	MWM	H	39	37	NonAIDS		4.77		428	3	91	Simplification	INNTI	2N+1NN	146	77	537	314	223		406	367	2.52	NO
120751821398	2010	YES	VIH&HEP	VHB	YES	NO	NO	2010	Woman	F	53	46	NonAIDS	3.95	4.18	231	260	1	20	Other	INNTI	2N+1NN	21	21	160	118	42		2825															295	1.3	YES
120753566921	2011	YES	VIH		ND	ND	NO	2011	Woman	F	39	33	NonAIDS	5.02	4.95		317	15	451	Other	INNTI	2N+1NN	9	144	237	84	153		2429	464	2.53	NO	389	1.3	YES			NO					YES				1.3	2.53
120756965101	2012	YES	VIH		NO	NO	NO	2011	MWM	H	36	30	NonAIDS	4.17	4.98	499	495	36	1096	Other	INSTI	2N+1II	108	603	767	56	711		2170	613	1.97	NO	715	1.3	YES	640	1.3		YES
120759543121	2010	YES	VIH		YES	YES	NO	2010	Woman	F	32	27	NonAIDS	4.13	4.17	140	147	13	371	Simplification	IPb	2N+1IPb	7	52	212	153	59		1925	193	1.75	NO								440	1.3	YES
120760280788	2012	YES	VIH		YES	NO	NO	2012	Woman	F	37	32	NonAIDS	4.82	5.04	248	232	5	146	Simplification	INSTI	2N+1II	33	89	261	139	122		1896									NO		530	1.3	YES	YES				1.3	1.65
120762432277	2012	YES	VIH		YES	YES	NO	2012	MWM	H	31	26	AIDS	4.84	5	3	6	30	893	SIDEFF	IPb	2N+1IPb	1	15	167	151	16	16	2010	38	1.63	NO	60	1.94	NO	77	1.3	YES	YES	180	1.3	YES	YES	230	1.3	YES	1.3	1.3
120764516175	2010	YES	VIH		NO	NO	NO	2010	MWW	H	61	54	NonAIDS	4.41	4.31	564	498	72	2191	SIDEFF	INNTI	2N+1NN	13	203	378	162	216		2750														YES	542	1.3	YES	1.3
120765235543	2011	YES	VIH		ND	ND	NO	2011	MWW	H	36	30	NonAIDS	5.18	4.26		16	31	945	Simplification	IPb	2N+1IPb	34	106	260	120	140		2163	53	2.84	NO	55	2	NO	87	1.52	NO	YES				YES				1.3	2.84
120768001735	2012	YES	VIH		NO	NO	NO	2012	MWM	H	36	31	NonAIDS	4.05	3.93	641	680	31	937	Other	INSTI	2N+1II	10	951	1171	210	961		1729									NO										4.01
120771969020	2012	YES	VIH		YES	YES	NO	2012	Woman	F	53	52	AIDS	4.91	5.36	97	92	67	2021		IPb	2N+1IPb	2	51	2154	2101	53	0	506				237	4.16	NO
120774907946	2010	YES	VIH		ND	ND	NO	2010	MWW	H	43	36	NonAIDS					85	2573		IPb	2N+1IPb	304	0			304		2247															212	4.47	NO
120775722980	2011	YES	VIH		YES	NO	NO	2011	Woman	F	57	51	NonAIDS	4.42	4.42	347	347	68	2065	Other	INNTI	2N+1NN	35	28	196	133	63		2382
120776134670	2011	YES	VIH		NO	NO	NO	2011	Woman	F	49	43	NonAIDS	4.41	4.4	446	244	2	71	Simplification	INNTI	2N+1NN	5	387	512	120	392		2278									NO										4.37
120778018772	2010	YES	VIH		NO	NO	NO	2010	Trans H vers F	Trans H vers F	35	30	NonAIDS	5.41	5.34	399	302	91	2764		INNTI	2N+1NN	21	126	364	217	147		2135	398	2.57	NO						NO					YES	734	1.3	YES	1.3	2.57
120781562447	2011	YES	VIH		NO	NO	NO	2010	MWM	H	54	47	NonAIDS	4.2	5.08	529	403	67	2033		INNTI	2N+1NN	105	483	763	175	588		2443							521	1.3		YES	750	1.3	YES
120783440590	2012	YES	VIH		NO	NO	NO	2012	Trans H vers F	Trans H vers F	28	23	NonAIDS	4.93	5.22	701	684	2	53	Other	INNTI	2N+1NN	17	141	468	310	158		1872									NO		1060	3.9	NO	NO				2.39	2.56
120783733546	2011	YES	VIH		NO	NO	NO	2011	MWM	H	47	41	NonAIDS	4.73	4.37	642	577	6	174	SIDEFF	IPb	2N+1IPb	56	204	427	167	260		2261	735	2.16	NO	740	1.84	NO	1132	1.3		YES				NO				1.84
120786525905	2010	YES	VIH		YES	YES	NO	2010	MWM	H	51	46	NonAIDS	5.52	5.52	72		10	301	Failure	INNTI	2N+1NN	24	0	816	792	24		1710														YES				1.48
120787594020	2011	YES	VIH		NO	NO	NO	2010	MWM	H	41	34	NonAIDS	5.67	4.68	618	386	47	1428	Simplification	INSTI	2N+1II	353	1	383	29	354		2465	665	1.7	NO	572	1.7	NO	760	1.7		NO				NO				2.33
120793979466	2010	YES	VIH		ND	ND	NO	2010	MWW	H	43	36	AIDS		4.5		502	12	362	Other	IPb	2N+1IPb	195	21	180	-36	216	2043	2345									YES						342	2.94	NO		1.6
120799694299	2012	YES	VIH		ND	ND	NO	2011	Woman	F	43	37	NonAIDS		1.69		369	69	2078		INNTI	2N+1NN	175	0	687	512	175		1736				299	1.3	YES			NO										1.69
120800816834	2010	NO	VIH		YES	YES	NO	2010	Woman	F	55	48	NonAIDS	1.75		10		9	273	Other	IPb	2N+1IPb	6	9	107	92	15		2260				8	1.3	YES	17	1.3		YES
120806621730	2011	YES	VIH		YES	NO	NO	2010	Woman	F	37	30	NonAIDS	4.65	4.65	331	331	83	2499		IPb	2N+1IPb	86	12	311	213	98		2478									YES						744	1.3	YES		1.45
120807155847	2011	YES	VIH		NO	NO	NO	2011	Woman	F	37	33	NonAIDS	3.6	4.8	646	714	4	109	Other	IPb	2N+1IPb	21	566	668	81	587		1368				716	1.3	YES	700	4.5		NO
120814510524	2010	YES	VIH		NO	NO	NO	2010	MWW	H	44	37	NonAIDS	4.69	4.19	685	530	36	1092		INSTI	2N+1II	7	1708	1746	31	1715		2744	680	1.3	YES												840	1.3	YES
120818142116	2012	YES	VIH		NO	NO	NO	2012	MWM	H	37	32	NonAIDS	4	4.02	756	756	21	626	Simplification	IPb	2N+1IPb	40	56	173	77	96		2079	748	2.29	NO						YES										1.3
120822201013	2011	NO	VIH		YES	YES	NO	2011	Woman	F	48	47	NonAIDS	5.42	5.42	149	149	72	2180		IPb	2N+1IPb	47	87			134		91
120824230373	2012	YES	VIH		NO	NO	NO	2012	MWM	H	29	28	NonAIDS	5.26	5.27	997	928	70	2117		IPb	2N+1IPb	0	72	323	251	72		530	917	3.08	NO	1590	2.65	NO	1506	1.66	NO	NO									2.43
120834873020	2011	YES	VIH&HEP	VHB	YES	YES	NO	2011	MWW	H	51	45	NonAIDS	5.96	5.63	13	9	2	59	Other	IPb	2N+1IPb	29	7	389	353	36		2122	72	2.82	NO	190	2.26	NO	365	1.81		NO	579	1.3	YES
120834957301	2010	YES	VIH		YES	NO	NO	2010	MWM	H	29	27	NonAIDS	4.69	4.76	265	360	81	2457		INNTI	2N+1NN	18	402			420		675
120835598170	2012	YES	VIH		ND	ND	NO	2010	MWW	H	39	32	NonAIDS		5.55		11	68	2049		IPb	2N+1IPb	706	2	1813	1105	708		2045											10	4.62	NO
120837841212	2012	YES	VIH&HEP	VHC	YES	NO	NO	2012	MWM	H	58	53	NonAIDS	5.1	5.1	212	212	1	3	Other	INSTI	2N+1II	13	68	404	323	81		1775	476	2	NO				523	1.3	NO	YES									1.7
120839519679	2011	YES	VIH		NO	NO	YES	2011	MWM	H	45	39	NonAIDS	4.3		672		-2	-74		INSTI		15	2544	1106	-1453	2559		2372									NO					NO				1.84	1.66
120842388332	2011	YES	VIH		YES	YES	NO	2011	MWM	H	30	24	AIDS	6.23	6.23	51	51	26	790	Simplification	IPb	2N+1IPb	3	22	837	812	25	6	2395				170	3.58	NO								NO	416	1.65	NO	2
120848440051	2010	YES	VIH		NO	NO	YES	2010	MWM	H	30	23	NonAIDS	5.38	5.42	301	332	24	707	Simplification	Other	2N+1IPb+1II+1IE	15	10	116	91	25		2727	500	2.07	NO	573	1.3	YES	572	2.35		NO	552	1.3	YES		622	1.3	YES
120849224269	2011	YES	VIH		NO	NO	NO	2011	MWM	H	41	35	NonAIDS	4.93	4.9	400	468	47	1428	Other	INSTI	2N+1II	6	164	197	27	170		2225	642	1.7	NO	739	1.3	YES			NO					YES				1.3	2.37
120854595363	2011	YES	VIH		YES	YES	NO	2011	MWW	H	52	46	NonAIDS	5.58	5.46	28	24	66	1991	Simplification	IPb	2N+1IPb	40	27	308	241	67		2142	111	2.68	NO	213	2.43	NO			NO						470	1.3	YES		2.29
120855480373	2012	YES	VIH		YES	YES	NO	2012	MWW	H	43	38	NonAIDS	5.19	5.19	1	1	35	1056	Simplification	INNTI	2N+1NN	19	14	141	108	33		1995									NO						230	1.3	YES		1.78
120855534851	2012	YES	VIH		NO	NO	NO	2012	MWW	H	28	23	NonAIDS	4.95	4.4	655	435	57	1721		INNTI	2N+1NN	284	168	648	196	452		1863														NO	490	1.3	YES	4.68
120855693996	2010	YES	VIH		YES	YES	NO	2010	MWW	H	45	38	AIDS			2	2	76	2331	Simplification	IPb	2N+1IPb	2	49	110	59	51	0	2545									YES		185	1.3	YES		206	1.54	YES		1.3
120856572449	2012	NO	VIH		ND	ND	NO	2011	MWW	H	44	42	NonAIDS		4.5		27	60	1819		INNTI	2N+1NN	519	54			573		54
120859517395	2010	YES	VIH		NO	NO	NO	2010	Trans H vers F	Trans H vers F	55	48	NonAIDS	5.38	5.22	353	352	21	632	Simplification	IPb	2N+1IPb	25	77	545	443	102		2562														NO	628	1.3	YES	1.85
120864618837	2010	YES	VIH		NO	NO	NO	2010	Woman	F	33	26	NonAIDS	4.26	4.1	379	355	0	1	Other	INNTI	2N+1NN	6	203	2625	2416	209		2687														NO	537	1.84	NO	3.84
120878726780	2010	YES	VIH		YES	YES	NO	2010	Trans H vers F	Trans H vers F	35	28	AIDS	5.36	4.89	146	69	46	1393	Failure	IPb	2N+1IPb	77	190	2199	1932	267	925	2698	119	3.37	NO	206	2.78	NO			NO					NO				2.78	5.1
120882137477	2010	YES	VIH		ND	ND	NO	2010	MWM	H	36	29	NonAIDS		3.68		884	38	1143	Simplification	IPb	2N+1IPb	18	471	1163	674	489		2734
120885014832	2011	YES	VIH		NO	NO	NO	2011	MWM	H	35	29	NonAIDS	4.6	4.6	554		12	351	SIDEFF	IPb	2N+1IPb	31	0	235	204	31		2213	554	2.82	NO											YES	709	1.3	YES	1.3
120885524928	2011	YES	VIH		YES	YES	NO	2011	Woman	F	64	58	NonAIDS	5.63	5.45	181	230	6	181	Simplification	IPb	2N+1IPb	20	40	236	176	60		2265	299	3.3	NO	229	2.41	NO	272	1.3		YES				YES	310	1.4	YES	1.3
120886501550	2010	NO	VIH		NO	NO	NO	2010	MWM	H	37	30	NonAIDS	7.2	4.5	374	303	67	2015		INNTI	2N+1NN	10	848	1489	631	858		2760
120887746691	2010	YES	VIH		NO	NO	NO	2010	Trans H vers F	Trans H vers F	45	38	NonAIDS	5.26	4.38	503	322	3	84	Simplification	INNTI	2N+1NN	21	99	204	84	120		2724				475	1.3	YES	521	1.3		YES					526	2.02	NO
120891109645	2010	YES	VIH&HEP	VHB	NO	NO	NO	2010	MWW	H	43	37	NonAIDS	4.85	5.06	548	382	80	2418		IPb	2N+1IPb	14	238	655	403	252		2218															557	1.3	YES
120898815393	2012	YES	VIH		ND	ND	NO	2012	MWW	H	37	32	NonAIDS		4.76		527	4	126	SIDEFF	INNTI	2N+1NN	42	189	447	216	231		2030	820	2.46	NO
120901622951	2012	YES	VIH		YES	YES	NO	2012	Woman	F	44	39	NonAIDS	5.62	5.5	4	1	14	411	Intensification	IPb	2N+1IPb	8	42	489	439	50		1615	22	3.1	NO	60	2.42	NO	80	1.43	NO	YES	300	1.7	NO	NO				1.79	1.63
120903118312	2011	YES	VIH		YES	YES	NO	2011	MWW	H	39	33	NonAIDS	5.73	5.73	122	122	12	363	Simplification	IPb	2N+1IPb	3	24	373	346	27		2172	250	3.85	NO				328	1.88	NO	NO				YES				1.3	1.88
120903377711	2010	YES	VIH		YES	YES	NO	2010	MWM	H	48	41	AIDS	6.01	6.01	3	3	11	335	SIDEFF	IPb	2N+1IPb	3	6	1083	1074	9	0	2664				274	2.79	NO			NO						326	1.9	NO		1.99
120907940089	2011	YES	VIH		YES	NO	NO	2011	Woman	F	41	35	NonAIDS	5.34	5.34	348	348	23	707	Simplification	IPb	2N+1IPb	8	57	203	138	65		2255	359	2.59	NO
120908321559	2011	YES	VIH&HEP	VHC	YES	NO	NO	2011	MWM	H	56	50	NonAIDS	4.4	4.4	288	288	49	1490	SIDEFF	INNTI	2N+1NN	102	0	206	104	102		2296	336	2.15	NO
120908698678	2012	YES	VIH		YES	YES	NO	2012	MWW	H	71	66	AIDS	5.6	4.93	54	79	35	1074	Simplification	IPb	2N+1IPb	3	11	142	128	14	3	2066	242	2.9	NO	335	2.48	NO	254	1.3	YES	YES				YES	430	1.3	YES	1.3	1.3
120908788025	2012	YES	VIH		YES	NO	NO	2011	MWW	H	58	52	NonAIDS	4.91	4.95	329	484	54	1660	SIDEFF	INNTI	2N+1NN	72	202	463	189	274		2056	513	2.81	NO	464	1.86	NO	643	1.3	NO	YES				NO				1.86	4.77
120914052844	2010	YES	VIH		YES	YES	NO	2010	MWW	H	45	38	NonAIDS	4.63	4.63	199	199	4	151	Other	IPb	2N+1IPb	24	0	546	522	24		2671	287	2.38	NO	307	2.12	NO	265	4.55	NO	NO	339	1.43	YES		326	1.3	YES		4.55
120914074182	2012	YES	VIH		ND	ND	NO	2012	Woman	F	40	35	NonAIDS		4.2		719	48	1486	Simplification	IPb	2N+1IPb	185	0	374	189	185		1796	663	2.37	NO				830	1.3	NO	YES				YES				1.3	4.2
120915340602	2011	NO	VIH		YES	YES	NO	2011	MWW	H	51	50	NonAIDS	5.8	4.96	23	54	74	2252		IPb	2N+1IPb	12	20	200	168	32		195	54	3.25	NO	49	2.21	NO	71	1.3		YES
120916773378	2011	YES	VIH		NO	NO	NO	2011	Woman	F	30	24	NonAIDS	3.58	4.25	699	399	15	455	Simplification	IPb	2N+1IPb	24	381	657	252	405		2436															570	2.2	NO
120917974352	2010	YES	VIH		NO	NO	NO	2010	Woman	F	40	33	NonAIDS	4.65	4.65	384	384	8	235	Simplification	IPb	2N+1IPb	7	4	276	265	11		2594	392	2.75	NO	529	2.17	NO	546	1.63	NO	NO	455	1.3	YES		534	1.3	YES		1.63
120923839747	2010	NO	VIH		YES	NO	NO	2010	MWM	H	39	39	NonAIDS	6.8	6.8	272	385	91	2770		IPb	2N+1IPb	2	13			15		111	883	3.4	NO	887	2.62	NO
120923848986	2011	YES	VIH		ND	ND	NO	2010	Woman	F	29	24	NonAIDS		4.56		344	81	2460		IPb	2N+1IPb	339	50	445	56	389		1569	435	1.88	NO	466	1.71	NO								NO	504	1.3	YES	4.56
120926052272	2012	YES	VIH&HEP	VHB	YES	YES	NO	2012	Woman	F	41	40	NonAIDS	5.15	5.48	95	122	17	516	Other	IPb	2N+1IPb	18	30	278	230	48		546	160	3.55	NO	200	2.31	NO					260	1.3	YES
120931484401	2011	NO	VIH		ND	ND	NO	2011	Woman	F	35	29	NonAIDS		4.95		868	6	160	Other	IPb	2N+1IPb	164	0	276	112	164		1967	932	3.08	NO	828	2.1	NO			NO						747	4.8	NO		3.08
120932537257	2011	YES	VIH		NO	NO	NO	2010	MWM	H	38	31	NonAIDS	4.15	4.5	957	520	24	735	Other	INSTI	2N+1II	23	1833	2074	218	1856		2427	870	1.77	NO
120936153590	2013	YES	VIH		NO	NO	NO	2012	Woman	F	31	26	NonAIDS	3.2	4.92	748	736	1	18	SIDEFF	IPb	2N+1IPb	44	105	248	99	149		1778				670	1.3	YES	750	1.3	NO	YES	770	1.3	YES	YES	1050	1.94	NO	1.3	3.02
120936626613	2012	YES	VIH		YES	YES	NO	2012	Woman	F	41	36	AIDS	5.72		12		1	33	Other	IPb	2N+1IPb	0	17	527	510	17	22	1947	10	5.24	NO				46	2.59		NO					370	1.3	YES
120937160670	2011	YES	VIH		NO	NO	YES	2011	MWW	H	61	55	NonAIDS	7.36	3		678	11	329	Other	INNTI	2N+1NN	1	815	922	106	816		2141
120937893092	2011	YES	VIH		NO	NO	NO	2011	MWM	H	55	49	NonAIDS	3.38	5.1	1044	420	26	802	SIDEFF	INNTI	2N+1NN	20	1004	1071	47	1024		2291
120938656091	2011	YES	VIH		NO	NO	NO	2011	MWM	H	31	25	NonAIDS	4.77	5.02	461	486	31	959	Simplification	IPb	2N+1IPb	69	162	478	247	231		2045	531	2.16	NO
120942745387	2011	YES	VIH		NO	NO	NO	2011	MWM	H	28	26	NonAIDS	5.92	5.98	417	437	71	2148		INSTI	2N+1II	5	50	229	174	55		497							824	1.3		YES				YES				1.3
120946067273	2011	YES	VIH		NO	NO	NO	2011	MWM	H	40	34	NonAIDS	3.12	3.5	736	774	8	238	SIDEFF	INNTI	2N+1NN	39	1162	1428	227	1201		2401	1097	1.9	NO
120946753919	2011	NO	VIH		NO	NO	NO	2011	MWW	H	42	41	NonAIDS	1.3	1.3	358	358	79	2392		IPb	2N+1IPb	26	14	13	-27	40		559
120953864693	2010	YES	VIH&HEP	VHB	YES	NO	NO	2010	Woman	F	39	37	NonAIDS	3.73	3.73	227	227	90	2715		IPb	2N+1IPb	15	26	202	161	41		553				284	2.02	NO
120954292416	2010	NO	VIH		YES	NO	NO	2010	Woman	F	29	28	NonAIDS	4.37	4.37	229	229	87	2639		IPb	2N+1IPb	10	11	137	116	21		188							320	1.3	YES	YES									1.3
120955333948	2010	YES	VIH&HEP	VHB	NO	NO	NO	2011	MWW	H	47	41	NonAIDS	4.18	3	544	517	40	1217		INNTI	2N+1NN	0	1327	1468	141	1327		2377	593	1.5	YES
120956807434	2009	YES	VIH		NO	NO	NO	2014	MWM	H	36	34	NonAIDS	3.76	3.89	820	980	33	991		INSTI	2N+1II	17	154	228	57	171		573
120957271754	2011	YES	VIH		ND	ND	NO	2010	MWM	H	39	32	AIDS		5.8		11	2	82	Failure	IPb	2N+1IPb	321	4	965	640	325	321	2300				42	1.81	NO					212	2.21	NO	NO	369	1.38	YES	2.85
120957363307	2012	YES	VIH		NO	NO	NO	2012	MWW	H	73	68	NonAIDS	4.77	2.68	757	440	48	1457		INSTI	2N+1II	93	521	864	250	614		1810											620	2.08	NO		690	1.3	YES
120960003137	2012	NO	VIH		ND	ND	NO	2012	Woman	F	51	50	NonAIDS					69	2077		INNTI	2N+1NN	5	5	134	124	10		327
120960552454	2011	YES	VIH		NO	NO	NO	2011	Woman	F	40	34	NonAIDS	4.55	4.55	362	362	34	1022	Other	INNTI	2N+1NN	18	0	200	182	18		2338							419	1.3		YES					599	1.3	YES
120966243922	2009	YES	VIH		ND	ND	NO	2010	MWM	H	47	40	NonAIDS		5.08		452	21	645	Simplification	IPb	2N+1IPb	66	461	802	275	527		2583
120967277169	2011	YES	VIH&HEP	VHC	NO	NO	YES	2011	MWM	H	37	31	NonAIDS	6.82	5.51	417	682	24	721	Other	Other	2N+1IPb+1II+1IE	3	6	182	173	9		2449	908	2.16	NO	660	1.54	YES	762	1.3	YES	YES	830	1.3	YES	YES	974	1.3	YES	1.3	1.3
120967586696	2012	YES	VIH		YES	NO	NO	2012	MWM	H	40	35	NonAIDS	5.55	5.55	230	230	42	1281	Simplification	IPb	2N+1IPb	80	14	299	205	94		1897	499	3.37	NO												600	1.3	YES
120968059718	2010	YES	VIH		YES	NO	NO	2010	Woman	F	30	23	NonAIDS	5.83	5.83	242	296	11	330	Simplification	IPb	2N+1IPb	13	14	1631	1604	27		2816														NO	592	2.59	NO	1.81
120968349695	2010	YES	VIH&HEP	VHB	NO	NO	NO	2010	Woman	F	49	42	NonAIDS	4.12	4.21	476	441	32	1000	Simplification	IPb	2N+1IPb	0	558	780	222	558		2588	540	3.09	NO
120969799220	2012	NO	VIH		NO	NO	NO	2012	MWM	H	30	25	NonAIDS	4.91	4	613	850	46	1400		INSTI	2N+1II	21	748	331	-438	769		2015	900	1.3	YES
120970128357	2013	NO	VIH		YES	YES	NO	2012	MWM	H	51	49	NonAIDS	4.64	4.82	161	207	23	686	Simplification	IPb	2N+1IPb	136	0	668	532	136		686															342	1.3	YES
120970287501	2010	YES	VIH		NO	NO	NO	2010	Woman	F	39	32	NonAIDS	4.96	5.2	448	412	69	2079	Simplification	IPb	2N+1IPb	66	251	541	224	317		2463									NO					NO	641	1.3	YES	2.97	5.12
120970618665	2011	YES	VIH		NO	NO	NO	2011	MWM	H	34	30	NonAIDS	3.49	4.28	386	338	69	2083		IPb	2N+1IPb	7	156	350	187	163		1190	495	1.54	YES	712	1.69	NO	479	1.3	YES	YES				YES	530	1.3	YES	1.3	1.54
120971264064	2012	YES	VIH		NO	NO	NO	2012	MWM	H	48	43	NonAIDS	4.88	3.8	601	470	51	1540	Simplification	INNTI	2N+1NN	42	553	713	118	595		2093	660	1.79	NO											NO				4.27
120971503853	2010	YES	VIH		YES	YES	NO	2010	Woman	F	31	24	NonAIDS	5.02	5.02	42	42	1	9	Other	IPb	2N+1IPb	14	0	398	384	14		2593	49	2.05	NO				117	1.81	NO	NO									1.81
120972347438	2012	YES	VIH		ND	ND	NO	2011	MWW	H	31	25	NonAIDS		4.7		590	41	1228		INNTI	2N+1NN	279	777	1173	117	1056		1918														NO	1290	1.99	NO	4.72
120973461329	2012	YES	VIH		NO	NO	NO	2012	Woman	F	49	44	NonAIDS	3.41	4.2	993	890	42	1264		Other	2N	16	785	829	28	801		2043	1109	1.7	NO				1063	1.7		NO	1382	1.7	NO		1100	1.3	YES
120976903796	2012	NO	VIH		ND	ND	NO	2010	MWM	H	36	29	NonAIDS		4.84		232	2	48	Simplification	INNTI	2N+1NN	773	14	899	112	787		1841	246	2.55	NO												261	1.3	YES
120976940333	2010	YES	VIH		YES	NO	NO	2010	Woman	F	34	31	NonAIDS	5.04	5.04	306	306	32	974	Failure	INNTI	2N+1NN	6	21	133	106	27		1330	291	2.45	NO												551	1.49	YES
120982945740	2010	YES	VIH		NO	NO	NO	2010	MWM	H	49	44	NonAIDS	5.37	4.31	541	337	30	934	Other	IPb	2N+1IPb	16	278	462	168	294		1842	457	2.45	NO	628	1.51	YES	507	1.3	NO	YES				YES	577	1.3	YES	1.51	4.54
120983771741	2010	NO	VIH		ND	ND	NO	2010	MWM	H	34	27	NonAIDS		5.3		163	12	354		INSTI	2N+1II	19	2234			2253		2568	240	2	NO						NO										4.1
120983927309	2010	YES	VIH		YES	YES	NO	2010	MWM	H	42	35	NonAIDS	5.33	5.33	137	142	8	266	Simplification	IPb	2N+1IPb	22	30	211	159	52		2810	210	3.07	NO
120985729396	2012	YES	VIH&HEP	VHC	YES	NO	NO	2012	Woman	F	48	43	AIDS	5.49	5.49	225	216	14	435	Simplification	INSTI	2N+1II	26	30	124	68	56	237	1750	460	2.18	NO				300	1.3		YES				YES				1.3
120994880318	2011	NO	VIH		YES	YES	NO	2011	MWM	H	49	49	AIDS	5.46	5.46	51	51	73	2216		IPb	2N+1IPb	21	2			23	21	15
120997112512	2012	NO	VIH		YES	YES	NO	2012	MWW	H	25	24	NonAIDS	5.2	5.27	30	30	61	1839		IPb	2N+1IPb	30	0			30		84
120999900470	2013	NO	VIH		ND	ND	NO	2010	MWW	H	47	40	NonAIDS					58	1749		INNTI	2N+1NN	980	28	1792	784	1008		1738
120999900471	2013	YES	VIH		YES	NO	NO	2013	MWW	H	39	35	NonAIDS	2.49		316		39	1204	Failure	IPb	2N+1IPb	7	0	248	241	7		1771	316	2.49	NO	340	2.45	NO					490	1.3	YES	YES				1.3
120999900486	2013	NO	VIH		YES	YES	NO	2013	MWM	H	25	25	NonAIDS	5.8	5.8	37	37	58	1764		IPb	2N+1IPb	31	0			31		22
120999900495	2013	YES	VIH		YES	NO	NO	2012	MWM	H	36	32	NonAIDS	4.62	4.62	295	295	57	1714		INNTI	2N+1NN	80	48	247	119	128		1209	310	2.52	NO
120999900496	2013	YES	VIH		NO	NO	NO	2013	MWM	H	34	30	NonAIDS	3.2	3.8	1316	782	52	1588	Failure	INNTI	2N+1NN	35	225	517	257	260		1710														YES				1.6
120999900499	2013	YES	VIH&HEP	VHB	YES	YES	NO	2013	MWW	H	53	49	AIDS	5.4	5.4	121	121	58	1753		IPb	2N+1IPb	6	8	846	832	14	0	1755
120999900506	2013	YES	VIH		YES	YES	NO	2012	Woman	F	37	32	AIDS		5.2		154	37	1128	Simplification	IPb	2N+1IPb	147	16	270	107	163	0	1652											810	1.3	YES	YES				1.3
120999900508	2013	NO	VIH		YES	YES	NO	2013	MWM	H	39	38	NonAIDS	4.6	4.76	99	113	18	553	Simplification	IPb	2N+1IPb	12	28	550	510	40		581
120999900516	2013	YES	VIH		NO	NO	YES	2013	Woman	F	25	21	NonAIDS	6.5	6.5	464	464	32	957	Simplification	IPb	2N+1IPb	8	7	107	92	15		1736	830	2.26	NO	550	1.3	YES									950	1.3	YES
120999900519	2013	YES	VIH		NO	NO	YES	2013	MWM	H	45	41	NonAIDS	4.4	4.4	518	518	14	407	Simplification	IPb	2N+1IPb	15	10	207	182	25		1649							500	1.3		YES
120999900525	2013	NO	VIH		NO	NO	NO	2013	MWM	H	59	59	NonAIDS	5.9	5.9	979	490	57	1714		INSTI	2N+1II	25	35			60		84
120999900526	2013	YES	VIH		NO	NO	NO	2013	MWW	H	73	69	NonAIDS	5.1	5.29	400	390	9	273	Failure	Other	2N+1IPb+1II	63	71	540	406	134		1700	370	2.51	NO	590	1.68	NO			NO		650	2.1	NO	NO				2.76	2.31
120999900531	2013	YES	VIH		ND	ND	NO	2012	MWW	H	47	42	NonAIDS		5.3		186	22	693	SIDEFF	INNTI	2N+1NN	90	14			104		1652
120999900532	2013	YES	VIH		NO	NO	NO	2012	Woman	F	51	46	NonAIDS	3.37	3.98	686	390	52	1559	SIDEFF	INNTI	2N+1NN	429	98	672	145	527		1712	460	1.83	NO
120999900533	2013	YES	VIH		YES	NO	NO	2013	MWM	H	29	25	NonAIDS	4.39	4.39	350	398	57	1714		INNTI	2N+1NN	32	35	213	146	67		1722	480	2.2	NO
120999900535	2013	YES	VIH		ND	ND	NO	2012	Trans H vers F	Trans H vers F	43	38	NonAIDS		4.27		196	19	559	SIDEFF	INNTI	2N+1NN	140	98	273	35	238		1490	230	1.6	YES												260	1.3	YES
120999900536	2013	YES	VIH&HEP	VHB	YES	NO	NO	2013	Woman	F	35	34	NonAIDS	5.18	5.42	329	80	54	1642		IPb	2N+1IPb	34	105			139		382				250	2	NO
120999900538	2013	YES	VIH		ND	ND	NO	2012	MWW	H	46	41	NonAIDS		5.3			0	7	Failure	INNTI	2N+1NN	96	14	654	544	110		1573									NO										2.4
120999900541	2013	YES	VIH		YES	YES	NO	2013	MWM	H	44	40	NonAIDS	5.4	5.4	28	30	25	764	Simplification	IPb	2N+1IPb	7	12	333	314	19		1651									YES						250	1.3	YES		1.51
120999900543	2013	YES	VIH		YES	YES	NO	2013	MWW	H	61	57	AIDS	6.6	6.6	110	110	19	572	Failure	INSTI	2N+1II	13	19	682	650	32	15	1722	330	3.25	NO						YES						340	2.1	NO		1.4
120999900545	2013	YES	VIH		NO	NO	YES	2012	MWM	H	28	23	NonAIDS	5.7	4.84	390	353	1	50	SIDEFF	INNTI	2N+1NN	271	7	372	94	278		1662	520	2.4	NO	380	1.3	YES								YES				1.3
120999900549	2013	YES	VIH		ND	ND	NO	2012	Woman	F	39	34	NonAIDS		3.55		510	34	1014		INNTI	2N+1NN	145	728	988	115	873		1673									NO										2.77
120999900551	2013	YES	VIH		NO	NO	NO	2013	Woman	F	27	24	NonAIDS	3.8	3.5	488	332	14	422	Other	INNTI	2N+1NN	51	120	317	146	171		1345	590	1.36	YES	440	3.5	NO									640	1.79	NO
120999900552	2013	NO	VIH		ND	ND	NO	2013	MWM	H	54	54	NonAIDS					55	1657		INNTI	2N+1NN	21	84			105		84
120999900555	2013	YES	VIH		NO	NO	YES	2013	MWM	H	28	24	NonAIDS	6.6	6.6	160	160	1	35	Simplification	Other	1N+1IPb+1II	2	8			10		1702	360	3.2	NO				430	2.5		NO
[truncated: 5,246 more rows]
